# Supplementary material for: The Interaction Between CitMYB52 and CitbHLH2 Negatively Regulates Citrate Accumulation by Activating CitALMT in Citrus Fruit
Source: Front Plant Sci. 2022 Mar 21;13:848869. doi: 10.3389/fpls.2022.848869 (PMC8978962; doi:10.3389/fpls.2022.848869)
Supplement: Supplementary file 3 [file Data_Sheet_1.XLSX]

## Sheet: citric acid Physiological data
	GC1	GC2	GC3	SM1	SM2	SM3
citric acid (mg/g)	16.0184	23.5228	19.4916	12.9114	25.2094	6.85295
	PK1	PK2	PK3
citric acid (mg/g)	30.129	12.51	8.066

## Sheet: GC-SM-DEGs
Gene_id	GC001A(75d)S1_RPKM	GC002A(105d)S3_RPKM	GC003A(195d)S6_RPKM	SM001A(60d)S1_RPKM	SM002A(90d)S3_RPKM	SM003A(180d)S6_RPKM
Ciclev10000010m	16.8287	18.8907	16.3752	17.8816	25.8349	10.8864
Ciclev10000029m	2.08197	2.37601	0.875355	4.61527	2.67015	0.521024
Ciclev10000062m	20.3403	9.28257	18.2951	39.2981	16.8282	42.8376
Ciclev10000066m	10.1263	7.42727	3.21548	17.3012	12.8214	4.61767
Ciclev10000081m	26.44	20.8536	12.6037	23.9056	20.1317	11.1777
Ciclev10000093m	7.54924	6.1804	4.2928	11.412	6.83432	2.72732
Ciclev10000098m	0.551807	0.533426	7.29157	2.25827	1.32024	25.8712
Ciclev10000102m	26.2549	18.3638	13.1998	25.4977	11.5699	16.9252
Ciclev10000103m	80.6247	96.3476	37.4418	128.501	64.5676	27.9029
Ciclev10000109m	11.7239	5.10001	3.59288	18.8082	5.73136	8.68453
Ciclev10000111m	15.4236	12.4615	10.9116	15.9549	14.9934	6.17734
Ciclev10000115m	5.55546	3.04806	1.68343	8.57199	9.27712	2.12568
Ciclev10000129m	65.2021	60.9139	177.778	40.7199	48.3022	221.052
Ciclev10000132m	58.3326	46.3772	68.066	4.11028	4.83029	21.3128
Ciclev10000155m	41.7225	21.3696	17.4217	94.6148	47.4084	12.6326
Ciclev10000174m	1.69958	2.40433	3.02098	3.42687	5.70417	0.569079
Ciclev10000176m	11.6273	5.38846	3.66191	14.5428	5.99244	0.523109
Ciclev10000182m	5.48107	4.94785	8.35941	14.0525	5.32686	6.84679
Ciclev10000183m	13.5613	8.44836	8.91165	12.4257	19.4386	10.1813
Ciclev10000188m	9.09262	7.02442	5.03328	11.0545	7.43938	3.29692
Ciclev10000195m	50.7612	28.0178	22.7833	34.756	45.3678	20.8045
Ciclev10000207m	5.85179	3.51643	1.95055	9.32049	3.11414	0.508879
Ciclev10000218m	12.5298	16.5288	17.1419	8.81171	5.81493	11.4494
Ciclev10000220m	4.96642	1.01968	5.12479	5.1802	19.178	94.9546
Ciclev10000223m	10.5505	5.84215	5.85709	11.025	6.58392	2.24115
Ciclev10000235m	1.14512	7.26178	13.9174	5.99863	2.98564	2.39739
Ciclev10000236m	5.32576	2.48541	0.0514756	5.74956	4.98767	2.59994
Ciclev10000240m	13.4217	15.659	6.01928	11.2887	3.89658	2.6606
Ciclev10000254m	12.8018	18.3529	18.9029	4.6658	6.99741	8.12413
Ciclev10000260m	34.7603	46.0231	30.3924	57.8587	32.0154	83.8069
Ciclev10000273m	8.14987	4.71699	0.407405	11.3019	5.82727	0.222698
Ciclev10000281m	81.836	66.279	64.454	126.123	139.299	27.8302
Ciclev10000311m	27.5851	40.7118	128.847	53.2145	41.4148	128.551
Ciclev10000313m	5.45404	13.7735	15.7852	11.4545	12.4395	21.657
Ciclev10000329m	7.36478	9.05635	4.7358	1.24107	1.32366	1.39392
Ciclev10000333m	3.03796	3.7199	11.5241	9.78054	4.35459	26.8048
Ciclev10000337m	0.523568	2.19322	6.71809	3.61879	9.00573	11.3805
Ciclev10000352m	18.5396	12.7532	3.13757	25.6866	9.09318	5.40249
Ciclev10000353m	0.105975	0.409778	1.24758	6.41878	3.26192	21.8682
Ciclev10000358m	16.5713	12.1289	19.2165	32.3589	17.4451	8.49043
Ciclev10000363m	61.1458	189.443	223.468	236.923	233.346	157.224
Ciclev10000364m	9.39343	4.56507	0.517957	5.96597	1.99818	4.36018
Ciclev10000378m	6.52716	8.1199	19.0752	9.67779	14.5304	99.2467
Ciclev10000379m	11.439	10.2605	13.9351	0.135041	0.34851	0.566242
Ciclev10000387m	43.3126	40.4848	40.8386	63.6412	28.0862	29.1724
Ciclev10000392m	5.64903	26.2387	12.8732	4.66133	13.8454	18.9544
Ciclev10000415m	8.6262	95.1665	322.55	0.0398901	0	0.125448
Ciclev10000416m	16.9576	22.1964	15.7061	18.061	33.0396	14.4144
Ciclev10000418m	0.921072	1.66948	1.16178	12.4864	4.065	0.691508
Ciclev10000422m	6.2554	13.1265	24.0054	9.53245	9.57646	16.6253
Ciclev10000425m	65.2308	133.069	172.911	54.7296	92.6995	110.021
Ciclev10000433m	27.2414	33.4858	62.2939	42.8298	39.5207	67.7246
Ciclev10000437m	41.6685	15.4027	23.958	67.8312	13.8778	75.0917
Ciclev10000450m	1.1374	1.09951	5.54452	2.71194	4.74553	12.6868
Ciclev10000454m	40.7576	21.2199	17.698	50.3178	51.6905	29.3098
Ciclev10000459m	27.4658	13.5646	12.6836	15.4472	15.2635	13.0664
Ciclev10000464m	1.90806	4.87901	4.62364	6.34777	5.23783	0.686547
Ciclev10000479m	1.42458	0.90374	0.14974	3.57095	0.806047	0.114592
Ciclev10000510m	223.702	508.181	770.778	131.817	249.532	382.682
Ciclev10000511m	8.40766	13.7497	9.78093	18.4719	12.0753	3.09168
Ciclev10000513m	14.7473	11.0694	7.19737	27.9756	14.8167	5.45835
Ciclev10000518m	17.495	5.63741	1.1012	17.9373	5.22384	1.26409
Ciclev10000521m	4.89962	3.08417	0.383259	8.34711	4.4872	0.635482
Ciclev10000532m	21.0092	7.22545	3.28414	17.9401	10.4699	2.29661
Ciclev10000547m	8.98231	10.0431	8.73615	11.6481	9.1114	2.92493
Ciclev10000557m	22.6555	1.08899	0.280674	26.381	5.38246	0.590681
Ciclev10000564m	20.8173	22.567	15.3985	32.0638	23.6326	10.4716
Ciclev10000566m	5.57422	5.15923	0.465406	8.44549	4.1337	1.47554
Ciclev10000572m	6.966	6.50623	6.52735	9.33753	13.9226	15.0146
Ciclev10000576m	7.69073	6.00672	34.0341	22.7616	12.4955	28.9298
Ciclev10000591m	4.99818	5.61219	3.49166	9.75551	8.56241	2.21024
Ciclev10000592m	5.59403	9.0128	14.3178	9.98993	6.80351	22.6898
Ciclev10000597m	9.81341	7.7143	2.2368	6.75241	6.24814	2.12815
Ciclev10000599m	6.67038	1.22569	0.618078	12.5438	0.898318	0
Ciclev10000603m	33.8646	33.9321	34.4688	29.2126	37.4289	56.0914
Ciclev10000605m	13.8722	8.8671	10.2208	24.7944	14.7114	10.4451
Ciclev10000610m	0.282961	0.136768	0	6.42702	1.28082	0.0606964
Ciclev10000617m	231.725	224.183	328.351	114.385	182.316	123.755
Ciclev10000618m	3.05205	4.55385	8.10845	12.4905	7.98872	3.70035
Ciclev10000625m	41.3814	44.5679	81.2753	82.5648	94.4056	116.083
Ciclev10000627m	1.98141	18.7816	32.2121	4.86535	6.87611	7.46147
Ciclev10000637m	19.648	16.66	12.5251	44.3861	33.2369	20.3263
Ciclev10000648m	27.3387	32.6259	11.9616	34.5517	19.874	10.0782
Ciclev10000654m	2.34294	3.31023	6.66821	19.9146	9.57197	5.46384
Ciclev10000656m	36.8019	47.0889	74.7043	81.1021	96.8905	76.5941
Ciclev10000671m	40.3558	34.8431	49.9569	47.1487	52.8993	87.7032
Ciclev10000672m	31.6146	31.3702	17.2874	27.5886	40.7939	17.4344
Ciclev10000673m	12.135	5.86538	3.76583	175.459	95.7334	7.01882
Ciclev10000682m	375.027	286.255	438.486	321.519	642.414	896.842
Ciclev10000690m	29.7124	21.4036	19.1889	8.43635	17.2796	8.07937
Ciclev10000692m	7.68224	3.20683	0.326258	7.90754	2.95049	0.249678
Ciclev10000693m	11.2202	12.0957	30.824	13.3188	20.3152	31.4519
Ciclev10000702m	55.0306	36.5765	22.0571	112.408	43.7687	21.0419
Ciclev10000706m	22.188	9.56682	10.2852	16.2376	11.1275	5.2344
Ciclev10000707m	20.2353	22.8319	29.253	21.6219	21.3819	41.926
Ciclev10000709m	43.8026	72.4473	36.1233	74.7477	144.863	83.349
Ciclev10000740m	29.1667	25.0554	9.63902	16.3149	14.9318	10.3818
Ciclev10000747m	187.885	173.464	64.2158	194.574	140.853	22.8995
Ciclev10000751m	1.99197	9.90317	26.5612	34.7049	38.2564	7.32491
Ciclev10000754m	33.3968	15.7904	0.0906635	63.4073	36.9691	0.208148
Ciclev10000756m	20.4689	12.202	5.9013	23.5352	18.3099	16.6009
Ciclev10000761m	154.697	183.725	418.345	167.173	267.251	408.964
Ciclev10000764m	33.5312	36.2315	18.1595	25.1445	20.6613	11.9446
Ciclev10000770m	55.0676	20.9647	1.44825	29.7704	11.3861	0.349992
Ciclev10000781m	61.6594	44.4851	33.7871	20.7113	24.9851	18.084
Ciclev10000783m	5.19699	1.65492	0	10.7094	0.774913	0.05246
Ciclev10000784m	34.3369	38.3339	67.6477	31.4903	45.766	54.8111
Ciclev10000788m	2.02754	1.0163	15.4076	10.5719	9.4496	1.09535
Ciclev10000804m	81.8717	49.5996	29.421	61.7562	65.5663	28.2367
Ciclev10000808m	17.4452	5.44001	1.26189	21.8213	2.86568	1.26747
Ciclev10000809m	4.34459	3.74051	6.31721	36.8385	17.6992	2.97054
Ciclev10000815m	17.1782	6.60536	3.93792	5.74961	4.04685	5.91761
Ciclev10000821m	4.86831	2.71508	1.60949	11.2389	6.49791	2.51696
Ciclev10000822m	1.43543	0.693806	1.52891	6.28572	2.98883	10.6535
Ciclev10000825m	49.4347	95.3254	86.2255	62.4701	65.6928	88.3339
Ciclev10000827m	4.49373	6.23275	13.7276	6.39674	4.83464	28.2193
Ciclev10000828m	32.1333	19.4009	2.9919	13.2416	11.1227	5.62866
Ciclev10000835m	55.7918	22.0957	8.26944	63.1788	14.8087	4.32337
Ciclev10000841m	22.7668	12.1046	1.05106	16.7712	3.57657	0.91926
Ciclev10000842m	7.31918	9.09102	17.7482	11.7725	8.74485	8.2516
Ciclev10000843m	36.9809	28.0885	46.88	57.4265	27.4713	64.7319
Ciclev10000846m	0.0739265	0.0714639	5.63621	0.0605089	0.870033	6.78703
Ciclev10000848m	0.373437	0.938593	0.167477	54.6518	8.45181	0
Ciclev10000849m	4.43729	8.57895	0.497503	10.0656	2.98411	0.271948
Ciclev10000852m	35.9729	50.1323	68.1099	29.5012	30.919	69.9576
Ciclev10000865m	21.3884	14.0596	7.67372	20.6307	12.3923	7.11478
Ciclev10000866m	22.0597	15.4366	1.38431	38.0655	12.5189	1.48313
Ciclev10000876m	12.5978	14.4439	25.4241	27.8646	22.6505	19.2554
Ciclev10000878m	29.524	16.9819	23.508	49.3512	23.7526	19.4488
Ciclev10000881m	30.093	17.7948	11.6056	17.1632	14.5394	15.4281
Ciclev10000891m	26.3098	32.2964	28.1604	59.1347	32.8379	60.6075
Ciclev10000895m	4.55527	3.96318	3.06439	13.0497	3.57404	2.3451
Ciclev10000906m	40.1014	51.961	68.6865	29.0275	51.6175	57.2153
Ciclev10000917m	8.80375	10.0302	25.1173	34.2279	19.4269	46.3342
Ciclev10000918m	6.20002	12.1368	53.7863	6.59714	13.3306	65.1001
Ciclev10000931m	24.5574	22.1044	36.1044	37.8194	50.2817	43.0119
Ciclev10000947m	16.9042	14.8242	11.5156	28.4896	21.7605	11.9338
Ciclev10000948m	55.5582	104.387	143.996	60.9649	72.117	130.541
Ciclev10000950m	4.92111	14.7472	33.1049	4.83352	11.7317	28.4308
Ciclev10000963m	21.0785	6.01864	4.12105	15.6564	14.3967	5.47077
Ciclev10000964m	158.432	129.915	85.5021	63.4407	176.432	130.414
Ciclev10000967m	0.38801	2.93817	9.06316	1.6938	5.62025	6.93582
Ciclev10000980m	12.8464	20.9016	17.7505	14.8096	11.7118	0.54336
Ciclev10000982m	116.33	79.7476	57.1865	53.4685	50.9361	51.6464
Ciclev10000991m	0.231817	1.23252	0.519819	7.77943	1.67891	3.6797
Ciclev10000998m	7.08325	1.10663	0.641749	9.31137	1.42499	0.613894
Ciclev10001015m	5.67632	2.51223	0.383386	5.48572	2.29078	1.05623
Ciclev10001035m	51.4938	74.3378	112.067	54.6865	72.02	98.9715
Ciclev10001037m	0.47935	0.405459	0.13436	1.17704	0.542444	6.73488
Ciclev10001042m	20.0953	7.64393	3.46625	13.1876	6.35115	3.26478
Ciclev10001045m	27.7915	19.1992	12.3118	12.6498	7.24106	9.30559
Ciclev10001054m	530.791	800.322	1738.11	399.371	740.309	1597.07
Ciclev10001082m	4.03812	11.339	32.7704	12.1191	6.78917	29.4506
Ciclev10001093m	0.148091	0.357895	12.2868	0	3.35167	35.9593
Ciclev10001096m	16.7884	15.0084	15.075	16.1126	13.6518	3.69679
Ciclev10001100m	70.1041	74.9927	108.867	47.4792	77.2491	51.8152
Ciclev10001114m	3.43651	0.86373	3.08238	21.0959	7.77769	0.353831
Ciclev10001122m	2.05718	1.01462	5.88388	19.3122	2.77454	4.97108
Ciclev10001131m	9.20333	5.90265	2.7781	18.4702	7.13007	0.379645
Ciclev10001136m	10.4789	7.64513	5.98522	13.324	10.0235	3.84523
Ciclev10001142m	73.093	66.9675	78.4988	129.33	158.71	84.3245
Ciclev10001147m	18.9393	17.4122	12.4734	15.7729	12.6495	4.88644
Ciclev10001149m	3.5479	1.35593	0.555049	13.7094	1.19513	0
Ciclev10001155m	11.1611	70.6294	93.3797	19.7294	86.4374	172.859
Ciclev10001181m	14.8388	6.55307	19.2703	8.21357	9.51948	20.2429
Ciclev10001187m	63.344	115.903	250.875	65.6263	134.632	215.295
Ciclev10001192m	18.7379	4.86321	0.735712	13.4273	2.50821	1.43884
Ciclev10001200m	76.4738	53.929	46.7568	56.7848	91.7445	40.9745
Ciclev10001207m	11.0005	6.55767	8.11963	21.7595	6.30721	13.3714
Ciclev10001212m	196.422	7.71797	0	175.387	32.4087	1.03123
Ciclev10001223m	20.9794	15.3269	9.19241	26.1028	24.4502	16.2937
Ciclev10001231m	4.37129	2.51257	2.98036	12.9578	5.82904	2.88901
Ciclev10001232m	4.30003	2.42041	2.86827	7.21736	4.87833	12.0025
Ciclev10001247m	27.7065	34.3563	45.9491	25.7825	29.935	58.7242
Ciclev10001249m	19.4875	7.98318	3.78267	14.2607	6.74683	2.03067
Ciclev10001250m	21.0649	14.1411	13.941	29.5743	36.2861	6.71502
Ciclev10001255m	17.0121	17.349	1.25761	58.2225	25.2171	0.160403
Ciclev10001261m	26.8419	16.2769	12.3223	30.1585	27.744	18.0136
Ciclev10001262m	69.6707	53.0755	65.0339	163.865	66.1009	119.277
Ciclev10001266m	2.51355	4.1397	27.8685	4.34328	9.10207	27.7971
Ciclev10001268m	19.5334	21.0856	37.0484	11.1917	10.3891	29.0506
Ciclev10001272m	37.8829	56.8828	88.3184	31.9212	51.3263	73.7055
Ciclev10001273m	19.7928	23.7942	64.3931	33.3009	31.4721	44.6337
Ciclev10001305m	46.6436	27.7022	26.4044	17.6541	16.7664	11.5093
Ciclev10001308m	12.5017	7.45683	15.1102	37.0842	7.86624	5.40136
Ciclev10001310m	21.8504	26.0809	15.4121	43.41	16.7165	8.80188
Ciclev10001314m	327.499	339.601	573.964	171.568	234.334	203.901
Ciclev10001318m	32.5744	35.4171	29.8044	32.919	36.8464	15.3633
Ciclev10001330m	19.2364	26.3732	41.249	24.725	28.8038	45.3107
Ciclev10001331m	23.6827	22.1733	30.5449	22.8409	20.6153	42.4165
Ciclev10001335m	2.7148	27.837	1.6306	3.49182	2.80881	8.90142
Ciclev10001340m	0.1872	0.0904821	4.51256	1.83868	0.423681	8.51291
Ciclev10001348m	6.34789	7.48345	7.72472	4.11858	5.32624	14.6792
Ciclev10001352m	51.5475	32.1457	17.4131	23.9424	13.8014	9.97393
Ciclev10001364m	74.7676	80.1618	146.72	89.1901	103.636	150.834
Ciclev10001371m	146.421	94.1716	72.3087	209.488	233.695	181.186
Ciclev10001374m	12.9596	26.1873	57.8391	27.6477	58.1316	98.4257
Ciclev10001380m	15.2105	22.7836	35.3739	46.4709	33.5388	80.8893
Ciclev10001382m	1101.01	322.544	215.27	471.529	468.955	183.163
Ciclev10001388m	22.4271	44.8801	98.5386	0.948312	1.72315	26.2725
Ciclev10001390m	12.3369	16.2773	25.5143	3.20672	3.99956	3.07544
Ciclev10001393m	16.8935	57.5265	53.4008	3.21152	9.07755	40.9599
Ciclev10001394m	25.4879	21.1191	10.206	15.3026	15.6575	12.1962
Ciclev10001396m	24.4039	16.5309	33.5525	18.0792	25.6943	40.2476
Ciclev10001398m	1.423	2.52193	15.5113	4.33538	4.86669	34.526
Ciclev10001405m	149.633	183.996	206.669	570.663	571.905	376.004
Ciclev10001415m	200.334	444.649	1052.14	218.072	548.448	1484.81
Ciclev10001416m	45.4491	4.42456	0.540179	38.3832	2.68969	0.0688977
Ciclev10001426m	3.06195	2.54885	6.29387	2.64545	2.54099	12.2603
Ciclev10001427m	45.7188	48.6985	76.4069	32.7873	44.2436	63.4526
Ciclev10001434m	25.2818	27.6688	52.2648	25.1674	26.874	77.7141
Ciclev10001436m	69.8899	85.8347	70.7374	71.9303	59.2183	34.2159
Ciclev10001439m	0.842973	7.42458	46.6264	0	5.00283	69.5961
Ciclev10001440m	114.751	144.539	311.179	267.333	200.249	484.137
Ciclev10001443m	49.1478	16.1902	59.5747	60.3005	68.9513	277.738
Ciclev10001445m	103.855	46.0756	16.6799	27.8439	15.1838	3.33346
Ciclev10001459m	129.276	134.967	227.415	66.9794	95.675	221.842
Ciclev10001478m	5.79516	10.9534	6.59443	19.8937	6.57752	13.8038
Ciclev10001479m	504.706	331.073	191.038	462.844	228.487	97.6471
Ciclev10001480m	67.3393	75.2778	17.907	29.0426	20.5552	6.96302
Ciclev10001482m	9.08317	1.84855	0	6.10419	0.432789	0
Ciclev10001487m	54.7223	75.099	99.1617	48.7732	67.1612	102.549
Ciclev10001488m	26.3374	22.3795	32.6817	16.4172	22.3159	36.7518
Ciclev10001502m	2.49168	0	0	2.19051	2.08863	9.8977
Ciclev10001511m	1.9826	9.90218	17.1345	2.50175	0.29914	11.8368
Ciclev10001524m	156.967	68.4277	133.27	87.7872	62.3692	75.8638
Ciclev10001527m	38.8234	49.3987	59.1538	55.5419	113.326	113.884
Ciclev10001538m	13.9354	27.7001	32.1271	28.3727	24.8371	38.8595
Ciclev10001546m	50.5255	25.9531	25.7113	68.5183	29.9593	23.3555
Ciclev10001550m	66.8857	45.2909	67.6514	28.5351	42.4147	25.1077
Ciclev10001551m	66.9825	60.4461	36.8876	38.0131	28.7974	52.1694
Ciclev10001561m	44.8087	51.3129	20.2244	36.4879	22.3629	3.74608
Ciclev10001563m	397.91	135.458	57.8189	217.656	83.2864	75.7146
Ciclev10001564m	22.6997	42.8079	27.2238	16.8284	34.0255	99.3793
Ciclev10001565m	13.0213	18.6962	89.5283	11.3633	5.54739	44.1972
Ciclev10001575m	54.3697	63.5789	168.346	94.4264	75.2426	285.168
Ciclev10001576m	31.089	30.4018	28.3904	25.9627	35.5686	50.1024
Ciclev10001578m	0	0	15.8998	0	0	0.506989
Ciclev10001601m	12.4318	6.59035	13.9384	13.4579	22.7269	14.9334
Ciclev10001604m	66.2045	83.4542	75.4528	23.1065	24.8973	13.9863
Ciclev10001618m	10.1955	5.69651	1.67795	8.03878	2.96375	0.481536
Ciclev10001630m	0.555044	4.72168	11.2015	1.09033	1.90943	12.3822
Ciclev10001639m	28.1922	41.6019	56.8511	35.1431	34.8115	67.8671
Ciclev10001649m	0.195426	0.755664	1.09554	2.71926	11.6767	15.2588
Ciclev10001658m	31.8848	42.776	62.09	20.4589	7.19633	48.4254
Ciclev10001660m	7.38999	3.83847	3.83362	9.93073	4.59324	22.0506
Ciclev10001661m	4.42555	0	0	21.7339	0.231141	0.073023
Ciclev10001676m	23.1829	39.5343	77.0618	64.9434	50.1039	177.341
Ciclev10001682m	12.7076	11.8025	36.4104	15.9077	17.369	53.8752
Ciclev10001683m	9.93679	10.0861	4.31713	4.57497	22.1521	6.1813
Ciclev10001687m	14.0976	12.6852	9.34446	7.11204	2.00669	5.17313
Ciclev10001690m	62.7264	40.6837	24.9454	117.018	65.6034	7.59004
Ciclev10001701m	0.285058	11.941	22.4787	5.59968	9.4623	52.4226
Ciclev10001702m	32.6278	25.7423	12.8393	11.3816	6.82911	3.35319
Ciclev10001705m	75.1517	58.7057	58.1941	69.5114	57.7265	29.1469
Ciclev10001713m	74.4959	108.559	205.466	22.7519	41.3614	66.0869
Ciclev10001722m	18.7965	38.1855	99.7022	52.4807	79.8997	98.8131
Ciclev10001726m	35.1262	28.7697	1.58894	34.5507	15.5791	0.260567
Ciclev10001734m	16.9033	11.5537	39.1478	18.3074	14.9934	47.6119
Ciclev10001739m	24.8333	10.6852	19.9939	34.5604	33.1554	19.0313
Ciclev10001740m	11.036	7.11223	16.0682	23.7742	11.5866	45.7671
Ciclev10001742m	15.8781	15.4445	16.9177	7.66858	8.4818	22.1702
Ciclev10001756m	4.4069	3.18337	8.19873	18.5109	6.5762	13.0887
Ciclev10001759m	26.0385	24.6279	9.55631	27.2923	16.8739	17.9214
Ciclev10001768m	47.5424	69.9928	55.3137	19.8395	34.3615	34.3056
Ciclev10001800m	10.0192	12.5279	48.1082	128.894	21.0985	98.4877
Ciclev10001802m	64.1667	46.5947	51.3394	32.3013	41.7266	34.2054
Ciclev10001807m	44.0635	40.7045	75.515	54.7471	32.2161	92.7195
Ciclev10001812m	10.249	1.33673	6.11029	15.7123	10.6775	32.1043
Ciclev10001818m	8.32957	13.5804	47.2525	16.1795	21.7219	64.8555
Ciclev10001821m	67.9705	60.6977	63.2109	40.3238	32.5158	18.8372
Ciclev10001822m	10.7167	3.15934	13.2084	13.9351	3.7844	68.6046
Ciclev10001844m	11.5322	2.26273	0.128018	7.75692	0.206735	0.293906
Ciclev10001847m	21.4973	22.0965	13.2208	69.6398	58.8772	31.8313
Ciclev10001849m	24.7862	13.742	4.69976	39.6799	11.9619	1.32918
Ciclev10001851m	78.4606	40.3348	81.2569	78.6975	36.5416	129.504
Ciclev10001854m	506.104	86.2077	188.592	1844.79	322.313	1662.03
Ciclev10001864m	6.85509	5.46706	2.78611	12.5544	6.28348	1.10283
Ciclev10001867m	33.3544	6.86771	13.9056	41.493	5.34148	2.99618
Ciclev10001872m	10.8561	7.87088	0.608588	10.3075	4.22606	6.61347
Ciclev10001885m	7.64245	17.3876	17.2238	49.4742	41.7918	12.2536
Ciclev10001901m	1.95616	0.490258	2.43691	58.8263	18.2338	8.82723
Ciclev10001942m	107.719	171.201	117.781	51.9106	106.698	63.5753
Ciclev10001944m	0.199527	2.411	12.7513	0	0.0903157	5.30712
Ciclev10001946m	5.94185	6.27576	61.8078	22.0655	36.5583	316.183
Ciclev10001961m	35.703	33.9959	20.4151	43.5422	34.5305	45.1337
Ciclev10001965m	46.4503	26.1254	55.9854	55.9925	32.5899	46.4675
Ciclev10001968m	63.9229	21.5892	89.1717	124.041	38.2701	387.937
Ciclev10001970m	0.222915	0.107745	3.49901	2.46316	0.504512	21.1348
Ciclev10001976m	13.1429	10.41	14.3553	36.9918	26.0226	22.4809
Ciclev10001979m	53.3275	31.1011	40.8483	78.6998	24.2052	121.512
Ciclev10001981m	0.289649	0.980001	0.974252	2.84494	1.04888	18.018
Ciclev10001994m	1.17907	0.835851	0	22.7757	6.40449	1.28144
Ciclev10001997m	23.8266	22.1702	64.9341	14.097	15.7535	17.2278
Ciclev10002005m	82.2359	61.3066	116.424	137.187	134.596	149.292
Ciclev10002007m	9.0029	8.95165	10.863	0	0	0
Ciclev10002010m	283.112	495.814	1036.36	214.15	661.273	1227.39
Ciclev10002078m	22.1392	4.48539	8.91815	18.555	93.3722	78.9407
Ciclev10002080m	73.4629	96.4647	112.932	50.2498	65.6581	115.083
Ciclev10002083m	42.7637	27.7881	21.5857	31.4438	34.6177	12.1799
Ciclev10002098m	10.7444	11.1794	13.7017	18.6627	28.8837	15.6932
Ciclev10002100m	55.9308	60.6785	105.427	78.8645	69.8706	159.476
Ciclev10002113m	60.5465	48.4123	28.7052	27.5397	33.8273	22.3385
Ciclev10002114m	35.8818	23.9652	14.7511	32.4842	24.6089	15.3003
Ciclev10002116m	22.3578	29.898	54.8346	33.3973	34.9148	57.7099
Ciclev10002119m	40.1244	10.5126	0.700731	22.0992	4.52643	0.965255
Ciclev10002129m	18.7507	11.3409	3.70995	5.49883	0.907755	0.258103
Ciclev10002139m	31.8343	48.0772	38.1055	21.5127	23.2813	45.4915
Ciclev10002142m	40.0129	55.4782	0	0.280719	0.206992	0
Ciclev10002164m	26.5861	12.356	5.92339	26.364	5.70853	0.292453
Ciclev10002169m	46.6335	12.74	2.50058	49.7864	17.8047	28.2696
Ciclev10002179m	0	0	21.4343	1.45869	6.74683	112.876
Ciclev10002182m	28.4274	27.4804	13.7734	39.8878	16.4522	11.0632
Ciclev10002200m	50.7893	67.4124	78.4423	40.7303	48.666	92.2484
Ciclev10002215m	13.851	20.0074	27.3105	7.03678	18.5927	28.6864
Ciclev10002228m	1.65805	7.3976	14.0138	3.34059	7.85154	18.1659
Ciclev10002231m	14.9208	30.972	40.9796	14.9582	27.3297	65.2025
Ciclev10002237m	80.6689	47.648	4.04745	137.624	35.572	0.595656
Ciclev10002239m	22.561	4.95191	4.64355	35.9512	3.15741	8.04235
Ciclev10002246m	55.4907	26.6835	33.5006	34.5884	64.1471	41.752
Ciclev10002276m	19.1302	18.6023	0.380742	17.9743	21.3151	2.03961
Ciclev10002290m	58.2577	35.9775	5.21593	58.9343	48.8162	2.63085
Ciclev10002292m	11.4755	19.5143	38.2227	29.6178	50.427	38.9533
Ciclev10002294m	1.87423	0.679423	30.0757	1.62994	0.106046	53.872
Ciclev10002297m	10.1603	8.90819	50.5999	80.1645	48.7714	189.56
Ciclev10002301m	6.69286	7.99916	16.5087	23.2073	8.042	2.50586
Ciclev10002311m	36.2659	30.9131	39.2087	18.1319	24.9875	35.0638
Ciclev10002312m	12.5935	10.6523	5.00073	23.7295	9.50077	3.71438
Ciclev10002332m	94.9268	91.638	125.368	60.9793	90.6785	125.375
Ciclev10002342m	14.2583	1.35372	0	23.7577	0.461002	0
Ciclev10002349m	966.254	1560.3	2099.71	1464.97	1701.39	2784.72
Ciclev10002359m	11.686	14.4059	25.9639	22.0258	26.4968	54.7332
Ciclev10002362m	1.16644	14.433	34.7873	0	0	1.00082
Ciclev10002391m	41.5329	20.8038	7.7798	55.3957	20.9393	9.05997
Ciclev10002395m	127.001	364.649	272.226	69.9746	202.957	859.74
Ciclev10002406m	40.6838	60.4244	142.522	47.8445	42.899	89.0741
Ciclev10002416m	14.2067	6.27816	6.52306	36.9888	21.5581	8.12641
Ciclev10002418m	266.947	327.114	216.034	154.672	340.029	126.332
Ciclev10002425m	37.9247	9.93104	1.18412	78.0357	14.5155	1.15332
Ciclev10002433m	59.7612	46.4675	8.37543	55.2948	21.0232	3.48343
Ciclev10002438m	107.062	57.0126	2.44259	17.1949	13.665	0
Ciclev10002464m	2.05973	7.96446	23.5264	1.26442	3.49626	22.8642
Ciclev10002475m	18.5932	33.6628	78.2623	24.1175	29.528	98.0178
Ciclev10002523m	8.50515	17.7418	27.1019	12.2742	16.4125	172.357
Ciclev10002529m	5.17743	9.26844	32.4642	13.0271	9.02705	43.436
Ciclev10002536m	75.4518	91.2238	277.94	44.7268	123.199	256.702
Ciclev10002540m	128.838	64.8455	29.5564	120.042	107.338	10.7253
Ciclev10002557m	99.2541	88.6209	86.1932	12.5552	1.1436	0.464518
Ciclev10002566m	79.9301	69.0156	161.542	84.2664	93.905	129.617
Ciclev10002567m	72.0157	36.6915	16.0641	42.7942	18.091	6.03888
Ciclev10002584m	4.87654	1.49994	0.745569	20.683	3.61205	0.570566
Ciclev10002591m	16.2986	38.4246	0.372934	21.0997	7.07644	2.85398
Ciclev10002596m	143.891	43.4572	8.13586	31.2907	16.0226	0
Ciclev10002599m	133.633	185.698	135.421	53.8479	70.0274	58.9833
Ciclev10002604m	29.0083	7.41341	0	23.6069	2.11297	0
Ciclev10002605m	29.2683	30.0168	80.1224	18.2407	30.8006	87.9581
Ciclev10002608m	41.4755	31.6724	36.5219	18.834	19.4597	28.4369
Ciclev10002610m	21.1112	43.3306	116.216	7.5342	11.8657	126.453
Ciclev10002611m	26.4042	31.5954	76.3305	39.7192	46.1278	91.9682
Ciclev10002624m	64.5274	61.16	100.752	49.7224	66.9066	109.77
Ciclev10002627m	31.9101	20.9552	8.75558	27.9919	24.2563	14.4406
Ciclev10002632m	91.5249	60.9789	57.4052	1.78039	0.302952	0.574259
Ciclev10002644m	354.915	849.271	307.653	340.201	430.397	122.225
Ciclev10002646m	44.5508	55.8507	28.3925	31.8588	42.7942	24.5447
Ciclev10002672m	61.7654	16.2932	2.11273	44.2143	3.98047	4.2217
Ciclev10002683m	0.430853	4.44267	6.76293	54.4262	8.97117	3.82002
Ciclev10002686m	19.4829	13.7457	4.66827	21.0909	12.5172	2.35921
Ciclev10002687m	93.6846	30.53	6.54627	135.767	32.3153	1.36628
Ciclev10002689m	640.529	577.451	566.742	297.478	433.757	421.961
Ciclev10002692m	167.639	160.337	123.698	90.9096	80.4402	56.2897
Ciclev10002693m	12.922	2.78829	0.129357	2.54973	1.56673	0
Ciclev10002698m	52.1253	28.8229	7.34972	77.6271	16.0806	0.453594
Ciclev10002714m	755.664	737.677	367.635	779.052	505.56	207.792
Ciclev10002725m	8.26647	12.1294	16.385	43.8589	38.7545	54.0824
Ciclev10002731m	263.298	173.022	113.062	389.15	384.582	53.7634
Ciclev10002732m	1.41606	5.8489	28.7224	6.95429	9.55643	12.4814
Ciclev10002733m	9.95261	47.4451	26.584	22.0427	69.4307	45.7115
Ciclev10002743m	514.095	579.503	776.229	430.028	255.509	682.904
Ciclev10002746m	91.107	71.5516	157.559	157.743	137.361	131.177
Ciclev10002747m	169.672	241.206	278.975	273.574	325.279	121.683
Ciclev10002749m	75.2947	220.947	167.713	88.4716	94.2181	56.7081
Ciclev10002758m	0	2.27829	7.59694	0	2.93372	32.6076
Ciclev10002760m	53.9437	51.8555	79.0645	42.4264	42.9696	35.6831
Ciclev10002762m	1.12641	4.35556	18.9438	8.48213	5.71055	11.9844
Ciclev10002766m	362.55	204.68	144.486	126.437	150.416	121.194
Ciclev10002778m	112.022	96.9165	67.2577	94.1314	72.7595	43.3662
Ciclev10002788m	93.9214	97.1394	105.917	73.143	42.2658	53.6719
Ciclev10002793m	200.557	96.5457	81.0232	218.787	69.5384	14.7697
Ciclev10002796m	25.4601	2.29434	0	7.59392	0.976653	0
Ciclev10002801m	47.1644	32.3236	37.4332	22.3064	20.302	20.7516
Ciclev10002803m	0.720339	1.39269	14.2144	12.1457	5.99953	16.8113
Ciclev10002805m	12.7504	280.241	477.725	5.16079	185.956	388.554
Ciclev10002812m	15.3771	2.77142	9.35085	18.7726	3.77516	0.670873
Ciclev10002813m	291.134	96.3901	17.9425	115.704	38.6336	89.9553
Ciclev10002819m	1256.45	2013.09	1610.43	851.889	1259.11	697.458
Ciclev10002820m	37.2106	1.24755	0	48.2382	0.973606	0
Ciclev10002831m	34.7314	38.6614	36.9736	0	0	0
Ciclev10002836m	26.1657	13.6199	3.61066	20.5929	11.4795	4.31742
Ciclev10002840m	93.2851	1.98629	0	92.8357	10.2308	0
Ciclev10002841m	72.6889	112.967	72.1219	62.304	101.911	35.3236
Ciclev10002843m	252.331	536.747	360.775	168.483	323.411	98.0122
Ciclev10002850m	0.643264	2.69462	18.5113	10.1792	6.01758	14.5342
Ciclev10002854m	38.5751	46.0809	92.7488	53.7834	54.1756	70.0975
Ciclev10002859m	7.69097	17.1204	41.8493	10.511	21.9738	91.9619
Ciclev10002862m	0	0	0	26.3938	16.6652	21.1323
Ciclev10002869m	25.2867	19.9338	3.88141	76.8754	15.2614	0
Ciclev10002870m	357.245	363.306	497.122	199.603	257.087	661.233
Ciclev10002885m	6.04577	4.41892	4.1883	0.120694	0.177991	0.0421737
Ciclev10002897m	6.00348	2.20132	0	22.5359	0.749648	0.355247
Ciclev10002899m	262.103	246.578	214.374	125.031	171.973	170.618
Ciclev10002900m	52.5449	6.36783	0	156.61	26.0727	0
Ciclev10002906m	141.189	11.8096	0	615.099	192.28	0.149743
Ciclev10002927m	25.1975	134.889	272.649	80.551	244.683	866.834
Ciclev10002928m	39.9106	64.0096	87.3152	51.3336	16.0713	23.9041
Ciclev10002937m	61.9859	46.4828	81.762	79.6473	66.6375	138.437
Ciclev10002941m	3.17355	3.06783	40.7209	29.1503	14.6843	54.1566
Ciclev10002945m	69.9029	105.41	128.216	71.0581	111.401	163.073
Ciclev10002947m	49.3275	50.7172	134.257	75.7559	80.9491	323.187
Ciclev10002949m	214.004	309.168	104.552	32.7963	145.097	91.4187
Ciclev10002953m	38.6838	54.0792	45.1511	22.7322	7.36326	15.1489
Ciclev10002973m	115.465	161.288	197.627	57.476	52.459	99.6833
Ciclev10002977m	102.514	126.641	157.433	110.767	220.847	159.33
Ciclev10002978m	61.7222	25.5712	17.9746	206.343	118.285	52.9587
Ciclev10002979m	1002.46	645.282	202.081	1111.33	891.755	606.685
Ciclev10002981m	237.703	284.331	324.907	8.98614	3.69826	2.40976
Ciclev10002984m	314.941	360.047	121.015	223.764	338.609	439.221
Ciclev10002988m	0.168138	1.30029	5.08987	7.84439	25.4199	25.6792
Ciclev10002998m	0	0.224756	6.64726	0	1.68386	25.3352
Ciclev10003023m	13.4448	22.7652	37.1571	18.7848	19.1488	30.4928
Ciclev10003025m	163.581	115.918	125.56	82.7272	80.8198	183.414
Ciclev10003027m	15.7706	7.23763	29.1124	7.17124	10.4554	9.22596
Ciclev10003038m	12.8526	5.46675	1.46721	5.73809	3.30023	0
Ciclev10003063m	12.475	16.4447	29.9717	0	0	0
Ciclev10003066m	107.832	127.862	164.887	103.307	118.728	206.78
Ciclev10003072m	22.3751	2.47197	2.62812	18.6628	9.25994	2.92544
Ciclev10003080m	12.3101	13.8473	16.1859	0	0	0
Ciclev10003086m	9.03098	6.75131	17.1457	2.75963	3.37931	2.89286
Ciclev10003101m	19.0271	20.94	134.889	49.1169	99.111	117.544
Ciclev10003123m	78.4861	306.66	281.057	101.613	268.814	150.304
Ciclev10003131m	15.8973	45.9635	90.8205	11.6516	13.476	37.8204
Ciclev10003138m	23.8069	26.4159	39.1095	51.2566	35.8894	18.5617
Ciclev10003142m	74.5928	56.046	32.5017	157.121	84.8111	49.1389
Ciclev10003185m	0.368398	1.24644	2.375	3.76918	2.41795	15.8046
Ciclev10003220m	12.7999	14.7303	7.24386	23.5477	8.3873	5.12517
Ciclev10003263m	11.1789	82.8498	58.9544	0.338886	1.4993	0.710494
Ciclev10003275m	1.76083	0.0851087	0.0987109	4.68403	0.557927	58.3177
Ciclev10003286m	39.7914	36.1375	58.5486	21.1346	23.463	111.684
Ciclev10003289m	0.0485297	5.62957	9.95719	0.0794433	3.73438	2.83147
Ciclev10003304m	1418.94	1079.73	1362.25	476.586	1047.94	1212.9
Ciclev10003326m	45.6438	37.1884	91.0396	12.2574	13.3137	60.6683
Ciclev10003364m	24.431	25.9294	53.6341	36.6375	40.9868	88.8329
Ciclev10003376m	0	0.811977	4.43967	0.0982151	2.28124	9.26611
Ciclev10003381m	0.15474	0.29917	3.81682	0.253309	0	14.6046
Ciclev10003400m	4.2163	14.2655	16.0727	63.1541	38.5518	41.603
Ciclev10003448m	3.1357	2.74707	8.6794	4.97274	3.45973	23.6258
Ciclev10003496m	38.8691	29.4084	26.6245	89.9796	44.6537	27.0655
Ciclev10003559m	64.8963	74.6955	63.9842	162.247	193.625	93.8146
Ciclev10003568m	8.96337	20.5592	23.1141	15.6735	32.4581	24.1908
Ciclev10003587m	21.0252	26.2603	66.3385	25.5852	36.7206	38.4746
Ciclev10003627m	26.547	33.389	73.9302	80.8402	70.2899	311.541
Ciclev10003648m	11.0161	39.9341	37.6321	10.7073	23.218	6.7936
Ciclev10003672m	1370.25	980.407	1590.34	408.667	982.373	1209.39
Ciclev10003675m	0	0	0.469852	0	0	38.2339
Ciclev10003676m	18.2451	36.9112	47.0984	16.9864	22.5907	22.4329
Ciclev10003681m	8.95018	36.9413	189.985	6.33799	15.4769	184.651
Ciclev10003688m	14.1714	45.579	185.022	73.0647	123.018	85.3423
Ciclev10003705m	1.09423	81.449	63.7954	0.895628	0.495303	0.938868
Ciclev10003722m	23.3713	21.3282	19.5549	38.5443	26.6843	13.5432
Ciclev10003732m	7.43433	22.2134	66.6821	22.1273	31.8159	53.9297
Ciclev10003734m	31.7526	32.7142	21.5477	80.7043	31.7714	22.9425
Ciclev10003772m	127.111	169.974	340.144	152.132	126.265	509.752
Ciclev10003800m	73.3434	12.476	0.352925	145.57	19.9478	0
Ciclev10003803m	36.8013	34.6392	97.6251	10.2328	7.41246	3.92814
Ciclev10003810m	37.3406	43.1927	33.9936	0	0.577853	1.09535
Ciclev10003829m	0	0	16.5316	0.156735	0.173356	51.0979
Ciclev10003897m	58.1652	47.5505	11.2716	29.0939	59.8078	4.92906
Ciclev10003913m	10.4224	17.4636	24.3168	8.61196	19.1403	26.4019
Ciclev10003923m	0	1.26532	1.14142	12.4991	11.0597	22.8359
Ciclev10003990m	0	0	0.280802	0	0	13.6456
Ciclev10004012m	6.38794	13.8941	3.38209	14.9594	6.10427	0.152249
Ciclev10004016m	5.28857	2.50507	0.474358	2.68379	0.861793	0.408391
Ciclev10004041m	43.6482	101.579	62.1432	65.4034	61.4673	28.3359
Ciclev10004042m	12.1433	23.3872	11.8345	7.03396	10.8665	3.36618
Ciclev10004044m	24.8248	22.6441	76.8862	82.9089	72.0316	87.3849
Ciclev10004051m	82.8195	64.0948	44.2811	32.5225	52.2235	28.1367
Ciclev10004054m	40.2555	48.8694	36.5461	38.4175	23.692	21.3592
Ciclev10004064m	4.83765	5.19611	5.12258	33.6568	18.4913	14.2971
Ciclev10004073m	38.5036	8.93952	19.7939	25.047	12.9383	12.5511
Ciclev10004079m	18.363	22.4074	32.8513	47.1437	45.6933	58.4599
Ciclev10004080m	42.55	37.1261	26.951	64.0006	42.2725	16.3577
Ciclev10004081m	41.5672	25.6308	23.2064	79.8065	93.0702	60.0293
Ciclev10004099m	6.25173	0.863353	1.25167	66.3389	2.93091	0.287362
Ciclev10004103m	2.10378	4.57583	70.5093	5.47334	9.99891	75.1043
Ciclev10004104m	2.03775	0.754416	1.89581	3.83261	2.15877	9.2629
Ciclev10004110m	144.94	11.343	112.722	57.9525	82.3257	49.1952
Ciclev10004130m	34.6931	25.2647	18.6719	57.5489	34.555	22.3828
Ciclev10004136m	84.5006	80.6702	76.1768	200.818	171.48	76.2456
Ciclev10004137m	6.55901	9.47195	16.5687	11.3945	8.65232	9.92319
Ciclev10004152m	10.488	11.7378	7.31435	11.1904	15.4007	6.99018
Ciclev10004154m	1.43427	0.560497	0.410574	14.9367	1.8786	0.261836
Ciclev10004156m	26.4419	15.1821	6.7006	29.0086	31.8646	4.05455
Ciclev10004171m	8.11597	12.2608	10.9047	7.63803	5.44361	3.04483
Ciclev10004179m	13.4568	11.2302	14.9348	19.8539	13.2311	30.1078
Ciclev10004181m	8.16905	5.61837	7.85577	14.2185	9.76315	6.26117
Ciclev10004191m	5.17851	4.1403	0.0436547	4.30235	4.33561	0.334079
Ciclev10004196m	9.86745	10.8827	11.8236	31.64	19.3395	6.98263
Ciclev10004215m	0.722952	0.727989	2.90452	9.61573	7.03575	3.20491
Ciclev10004216m	13.6882	8.99346	4.01843	25.2787	11.4599	1.40674
Ciclev10004218m	13.0219	14.1295	12.8122	14.291	17.7553	6.65822
Ciclev10004230m	27.769	21.8323	17.4381	35.5389	32.3261	15.3189
Ciclev10004236m	33.8613	32.531	41.3437	49.2302	37.4752	20.7936
Ciclev10004238m	45.3381	36.7185	30.9434	18.7531	9.3283	5.92874
Ciclev10004243m	14.1019	8.26516	4.68931	13.239	9.44918	3.08049
Ciclev10004245m	25.5887	12.8234	6.86441	11.6286	9.37988	4.07457
Ciclev10004250m	4.74099	5.73914	4.93243	1.53822	1.00534	0.329825
Ciclev10004254m	7.06471	4.08044	0.797067	4.80055	1.89055	0.6481
Ciclev10004255m	5.26029	4.86397	9.95782	9.5783	10.2835	26.1974
Ciclev10004263m	63.9442	50.0263	66.6915	111.458	66.2738	124.75
Ciclev10004276m	13.9217	7.88915	2.20677	5.18666	1.43417	0.16476
Ciclev10004281m	13.5711	19.1226	4.38419	11.974	4.248	0.907854
Ciclev10004287m	1.5884	4.24818	4.92713	0.130011	0.287595	0.0454291
Ciclev10004289m	5.27553	12.5138	13.5196	3.41088	5.89968	8.3683
Ciclev10004304m	6.92847	17.0454	15.0841	15.8727	40.2558	45.1675
Ciclev10004310m	7.87846	5.66873	10.9411	9.9659	8.10496	53.5795
Ciclev10004317m	5.13302	1.24051	2.81999	0.462152	0.185877	1.32127
Ciclev10004322m	11.1283	6.66401	8.06031	13.8643	4.10111	2.78844
Ciclev10004330m	11.7873	9.58466	8.20617	17.2757	11.2874	7.923
Ciclev10004332m	3.62711	6.88882	10.2863	0.279416	0.424939	0.951944
Ciclev10004362m	6.44968	5.63697	9.06388	8.67792	17.3567	7.2017
Ciclev10004367m	31.9029	31.3573	17.8845	25.2766	38.8758	15.6061
Ciclev10004369m	0.558601	0.638174	37.6347	0.623476	3.7238	58.0376
Ciclev10004372m	3.98389	6.43489	4.69285	27.2836	37.5727	15.1009
Ciclev10004373m	25.7941	39.5869	55.4343	33.5184	42.9831	54.3698
Ciclev10004375m	9.65591	7.15162	7.91758	10.5378	17.5265	14.4265
Ciclev10004381m	161.908	58.8863	0.247231	97.5529	22.957	0
Ciclev10004383m	5.14861	7.30246	10.4568	11.2607	6.53309	16.7289
Ciclev10004384m	22.9186	16.6663	12.0957	32.1521	20.8417	7.26348
Ciclev10004385m	2.67562	0.912878	11.9112	32.0126	39.2544	8.47392
Ciclev10004394m	31.3348	16.7141	9.91227	6.68668	33.7875	2.25648
Ciclev10004410m	198.828	72.6357	14.4777	55.4675	46.668	17.099
Ciclev10004418m	12.8169	7.72493	4.77067	24.7189	28.1389	4.18515
Ciclev10004419m	8.02996	4.49149	11.0981	13.3518	2.78894	21.4062
Ciclev10004430m	6.41857	4.78792	5.26982	12.9892	10.6606	15.8279
Ciclev10004441m	6.58398	2.15751	0.938373	36.2615	5.05125	0.909611
Ciclev10004446m	5.45366	1.26383	6.36585	12.1685	14.9468	6.15364
Ciclev10004453m	10.3269	5.86713	20.3129	14.0505	7.42173	27.3592
Ciclev10004456m	8.39743	32.9561	86.3219	337.8	100.646	57.2495
Ciclev10004465m	0.954964	0.173091	0.200755	10.3079	1.35083	0.204844
Ciclev10004474m	5.55268	4.72358	7.4707	20.5428	9.29965	11.5296
Ciclev10004479m	20.7526	33.6941	23.2675	19.8952	9.75695	7.47659
Ciclev10004491m	0.355212	0.490542	2.16198	1.03836	1.51599	7.75006
Ciclev10004499m	12.5153	5.10709	1.03514	10.4117	3.94694	2.42052
Ciclev10004502m	119.806	204.366	366.042	147.745	225.098	539.167
Ciclev10004503m	0.748293	1.26589	13.4236	0.306239	0.451619	13.2155
Ciclev10004505m	25.6986	0.124213	0	27.6076	1.62854	0.0551246
Ciclev10004506m	8.11275	9.32622	11.6034	19.3107	15.5226	22.1619
Ciclev10004519m	39.0531	23.007	43.3866	55.5259	34.5488	119.418
Ciclev10004521m	0.509932	0.123236	0.786128	6.88677	2.48132	0.656296
Ciclev10004530m	4.14858	0.520829	0.0604069	3.83661	0.585305	0
Ciclev10004534m	25.3047	16.8489	7.33628	33.5562	16.8274	17.6378
Ciclev10004535m	20.4855	24.7539	28.4835	39.602	30.5635	18.0395
Ciclev10004539m	13.1716	13.6127	36.9194	6.79286	8.48266	35.7419
Ciclev10004551m	2.05861	2.88032	8.26053	12.6817	7.45465	10.412
Ciclev10004563m	6.13818	13.8888	4.08385	0	0	0
Ciclev10004565m	19.7887	10.9907	25.898	10.1305	12.7683	10.99
Ciclev10004573m	34.4012	22.1701	15.7889	22.3393	24.4655	13.4063
Ciclev10004574m	1.85956	3.27422	28.742	6.74051	9.01852	108.439
Ciclev10004581m	3.89999	2.97358	0.123172	5.7099	0.994552	0.188522
Ciclev10004605m	35.1065	37.6868	53.7842	31.9498	38.0494	65.5101
Ciclev10004606m	6.26436	3.0829	7.78972	9.18269	12.7343	9.47942
Ciclev10004611m	5.47418	5.04569	4.21066	18.5998	14.5792	3.11309
Ciclev10004618m	20.4719	17.0603	11.1415	23.201	16.9109	10.5298
Ciclev10004620m	33.7253	39.6593	93.9512	287.834	132.361	226.949
Ciclev10004629m	4.52506	7.92846	16.2509	7.46541	11.2655	10.9198
Ciclev10004635m	13.2216	46.513	277.07	107.773	153.383	254.664
Ciclev10004641m	10.3186	4.60381	0.177986	1.55923	1.14972	0
Ciclev10004660m	7.68585	5.93555	9.19496	14.4093	16.326	18.1627
Ciclev10004676m	6.98556	8.6721	20.7757	7.46309	7.78854	13.9433
Ciclev10004678m	14.4496	8.14813	27.4736	22.1756	18.4772	132.917
Ciclev10004687m	8.81541	10.851	12.8488	35.1631	14.7907	25.3134
Ciclev10004689m	65.7347	142.755	193.043	613.129	374.035	195.275
Ciclev10004694m	130.011	99.553	79.9667	84.7518	50.8417	76.4355
Ciclev10004696m	4.83994	4.67872	4.91316	13.2764	17.5856	23.0646
Ciclev10004698m	5.50178	3.09585	0.0920675	9.54412	2.00717	0.140914
Ciclev10004707m	13.5762	22.3328	18.2274	52.526	30.7264	14.0469
Ciclev10004709m	175.319	128.227	24.6271	251	142.927	11.9462
Ciclev10004717m	25.9567	10.744	107.339	52.97	75.0808	108.218
Ciclev10004720m	1.56476	1.00843	8.96688	4.83843	3.14795	17.0808
Ciclev10004728m	199.981	60.5216	28.3853	145.719	56.3395	129.426
Ciclev10004732m	5.15551	4.69898	5.69771	12.1168	7.80102	26.4779
Ciclev10004733m	13.6445	25.3064	32.1081	37.9843	39.7143	35.53
Ciclev10004738m	79.5907	17.6676	0.0944296	54.391	2.5924	0
Ciclev10004753m	627.117	396.805	215.802	587.039	543.816	156.656
Ciclev10004755m	73.0936	41.934	21.1566	108.411	78.4765	30.4583
Ciclev10004760m	15.2607	12.6045	14.029	30.8206	22.5495	9.83303
Ciclev10004777m	25.3402	21.5506	38.8873	36.4941	30.1122	99.3436
Ciclev10004783m	54.0452	94.3457	141.66	45.5269	102.357	108.825
Ciclev10004785m	43.3447	18.4988	5.16994	151.032	45.8495	3.23109
Ciclev10004786m	0.499238	7.88259	135.364	16.8218	64.7809	487.468
Ciclev10004792m	12.4669	21.1875	55.3847	21.1215	26.5773	38.6465
Ciclev10004793m	208.925	225.519	309.98	209.278	308.144	395.827
Ciclev10004829m	14.3507	15.6882	19.9233	10.603	8.58848	8.38783
Ciclev10004832m	39.9255	21.6512	47.4025	29.3581	26.888	86.5471
Ciclev10004833m	5.59036	6.96677	7.47608	0.110258	0	0
Ciclev10004836m	21.9688	43.3689	52.7539	56.6313	81.7631	51.1322
Ciclev10004838m	97.4551	77.629	14.9811	70.0274	48.6266	62.571
Ciclev10004839m	30.6734	63.8698	197.164	132.903	323.416	415.203
Ciclev10004842m	70.2131	38.0386	9.42979	54.2119	31.1361	0.644321
Ciclev10004848m	40.666	31.1828	43.9687	42.7189	87.8045	67.2342
Ciclev10004868m	3.37279	9.22464	6.64072	25.8557	19.2884	11.9285
Ciclev10004870m	95.0175	74.7298	64.2897	25.6783	23.7131	8.6292
Ciclev10004874m	94.9137	88.0789	89.3754	71.7843	73.0084	26.1478
Ciclev10004881m	351.696	497.16	649.259	308.036	154.565	291.388
Ciclev10004899m	67.8725	6.3129	0	46.8453	25.3087	0
Ciclev10004900m	27.4033	25.8132	49.3159	62.8285	51.1669	49.6969
Ciclev10004905m	86.7331	103.698	23.1184	63.4232	18.9632	5.89732
Ciclev10004908m	6.1564	2.79198	0.170431	9.39373	1.51376	3.52153
Ciclev10004909m	173.84	190.376	154.285	46.9002	46.5268	40.0123
Ciclev10004916m	15.9896	10.4991	8.28718	35.929	30.8627	19.2848
Ciclev10004921m	1.06803	0.938593	0.10886	20.8215	12.0421	0.083308
Ciclev10004927m	191.49	105.293	62.0846	176.981	148.863	67.831
Ciclev10004929m	28.077	24.3561	58.8171	68.9432	48.6958	91.1004
Ciclev10004935m	0.330103	0	181.476	0	50.4545	1260.63
Ciclev10004948m	102.979	51.0633	38.2923	118.064	84.2393	122.238
Ciclev10004949m	32.7274	33.6085	53.9808	39.3262	45.4778	77.8833
Ciclev10004951m	43.8724	63.0666	65.3122	106.731	208.665	111.535
Ciclev10004955m	4.10708	4.82462	7.22778	14.5955	16.661	10.1258
Ciclev10004956m	55.3237	33.067	4.01129	81.2086	49.9265	1.64718
Ciclev10004977m	48.2755	27.8923	3.49488	43.1117	26.121	1.30299
Ciclev10004978m	13.8994	17.6262	15.9189	24.8941	18.6041	9.10473
Ciclev10004979m	91.9153	95.8017	188.607	64.1796	86.6287	144.897
Ciclev10004981m	44.3781	16.0324	2.65639	38.5612	13.2818	3.12749
Ciclev10004985m	85.3943	88.9285	51.353	172.769	114.064	27.9757
Ciclev10004997m	22.6765	0.398565	0	28.8197	2.91139	0
Ciclev10005012m	18.5879	26.8788	24.8019	11.002	24.1288	25.7025
Ciclev10005021m	64.7899	51.9425	70.8013	117.869	133.028	79.7543
Ciclev10005028m	11.0334	6.31417	4.65129	14.4493	8.15062	2.57497
Ciclev10005036m	46.1881	26.9368	16.745	53.4251	42.0019	17.2047
Ciclev10005040m	29.8541	11.5154	2.4733	89.2562	16.7753	6.68774
Ciclev10005061m	15.9384	17.4927	32.6495	10.4463	41.8224	56.4496
Ciclev10005062m	53.719	54.8801	62.6734	26.9096	38.2896	31.2018
Ciclev10005072m	11.2791	10.3696	3.7142	17.9474	7.28333	6.09082
Ciclev10005087m	22.3533	19.351	2.71195	16.726	12.0059	6.65557
Ciclev10005100m	13.9168	15.6432	12.8818	44.4377	39.994	11.5937
Ciclev10005110m	24.7651	26.0525	21.3497	10.9868	10.4563	6.24967
Ciclev10005111m	226.913	134.382	107.495	198.718	141.174	141.272
Ciclev10005113m	13.0822	7.53401	2.0805	8.65734	1.42791	0.398039
Ciclev10005117m	1.39388	1.87471	4.34866	1.53773	1.59107	8.9438
Ciclev10005126m	36.2676	47.5291	49.0468	34.2755	47.7264	66.9683
Ciclev10005127m	29.9766	12.0742	7.32511	96.4133	13.7428	6.59497
Ciclev10005135m	28.2459	14.8793	9.08762	25.1297	17.8627	8.57023
Ciclev10005137m	73.4681	39.4255	44.2024	65.6973	69.0233	29.7444
Ciclev10005149m	22.5039	18.1443	77.0152	3.21737	31.6711	232.042
Ciclev10005151m	0.0587193	0	0.987529	2.54728	0.106317	4.43363
Ciclev10005152m	18.3831	13.7217	0.521793	0.66662	0.842642	0
Ciclev10005157m	0	0	4.63413	0.322196	0	9.03484
Ciclev10005160m	21.2425	19.7481	36.1359	17.1872	49.8086	40.2239
Ciclev10005161m	99.4261	57.1201	14.8398	33.7258	15.5485	1.62236
Ciclev10005172m	41.7319	45.31	12.6769	103.314	26.6134	5.40922
Ciclev10005186m	0.120413	0.116402	6.21025	0.295675	0.43604	24.0727
Ciclev10005189m	16.388	10.5901	3.89449	7.1442	5.88604	0.611356
Ciclev10005198m	11.8589	2.59184	0	9.95976	1.77375	0
Ciclev10005200m	38.5695	15.6056	31.4054	90.8507	67.938	93.7394
Ciclev10005203m	2.17123	3.93544	17.9533	11.9958	4.09502	44.0898
Ciclev10005215m	51.9391	35.1288	52.6729	70.9274	117.796	125.183
Ciclev10005216m	34.3856	35.3496	49.2288	36.3174	34.4218	80.3968
Ciclev10005220m	7.54808	6.05466	3.24107	31.022	13.5939	4.75394
Ciclev10005225m	107.477	168.523	155.855	87.2721	562.445	110.498
Ciclev10005226m	3.03788	7.68055	18.8642	0	0	0
Ciclev10005228m	25.8512	22.0225	37.5584	28.7413	23.6468	46.8106
Ciclev10005233m	4.15875	3.33882	10.748	8.76947	13.0177	15.6036
Ciclev10005234m	1.30213	1.18471	1.11642	13.2284	10.8174	4.86333
Ciclev10005242m	8.40597	11.7536	5.38552	17.1393	7.06636	3.60623
Ciclev10005243m	7.78996	4.4457	9.68106	15.7482	9.60126	32.2117
Ciclev10005244m	14.8928	14.2201	33.4977	25.4266	34.6574	28.4572
Ciclev10005251m	1368.74	293.344	133.872	1092.24	660.426	502.46
Ciclev10005252m	5.24814	0	0	26.4896	1.0888	0
Ciclev10005259m	1.13077	2.49852	1.72059	5.42099	3.36353	20.0974
Ciclev10005261m	12.9484	24.8578	3.88498	7.16503	6.76914	0.312956
Ciclev10005283m	39.1968	17.7396	2.7072	29.711	23.3165	5.24845
Ciclev10005284m	12.7297	8.45622	14.7116	23.4568	17.4341	38.8163
Ciclev10005288m	10.7575	7.70063	1.6794	14.1549	4.19136	2.92092
Ciclev10005290m	70.9876	66.6401	25.3969	56.4246	38.2684	27.317
Ciclev10005308m	28.5223	25.8985	40.2545	22.4505	27.8011	63.9572
Ciclev10005316m	3.06165	12.6979	21.5927	0.161675	0.98351	0.16948
Ciclev10005338m	2.44811	2.04384	0	16.941	5.3392	0
Ciclev10005347m	42.0277	51.1533	71.1478	39.4518	59.5201	89.7941
Ciclev10005353m	68.9792	57.4384	45.3694	312.414	319.499	137.928
Ciclev10005358m	5.53362	6.10271	9.61218	7.91029	7.973	21.8673
Ciclev10005366m	6.88042	4.43415	2.07691	17.8335	6.06912	2.7247
Ciclev10005370m	631.607	450.871	96.5884	345.011	147.788	26.339
Ciclev10005375m	37.9517	61.1458	85.3075	52.2228	56.101	56.7104
Ciclev10005376m	35.0343	13.2474	12.2917	50.9138	10.2485	6.95265
Ciclev10005384m	14.6414	25.2849	50.1021	25.778	34.3107	122.747
Ciclev10005385m	0	0	2.11342	0	1.21891	53.9501
Ciclev10005397m	47.2105	35.0038	46.5594	90.7896	83.7365	68.3513
Ciclev10005403m	2.03352	14.3109	16.8717	5.72568	27.3933	22.5428
Ciclev10005408m	22.1097	21.8773	14.967	34.8279	18.5053	9.93268
Ciclev10005411m	17.4239	13.5212	13.9795	20.8689	28.2917	7.40644
Ciclev10005413m	27.2206	21.0185	13.3227	32.1441	26.8553	9.83401
Ciclev10005422m	1.36612	3.35232	6.59798	0.516079	1.80755	11.1805
Ciclev10005425m	32.081	5.66805	1.03305	11.0381	0.530811	0.431217
Ciclev10005441m	43.4027	41.7716	32.1194	26.8987	25.6745	11.1803
Ciclev10005443m	32.7869	44.7879	40.8446	49.6965	54.0363	23.2427
Ciclev10005453m	0.873074	2.25064	7.34159	4.10902	5.99382	6.67959
Ciclev10005457m	33.3122	57.0158	58.7218	47.6577	58.1793	100.97
Ciclev10005470m	40.5232	44.6393	41.3132	3.31682	4.60703	5.09414
Ciclev10005481m	131.878	255.351	288.669	352.463	584.76	396.123
Ciclev10005496m	14.5302	15.6303	4.28712	21.9081	16.5169	2.81214
Ciclev10005522m	12.3957	6.78271	2.49113	49.198	9.31623	4.31449
Ciclev10005525m	88.4995	84.0205	222.576	61.2283	116.889	143.475
Ciclev10005529m	95.9833	55.0551	55.7183	73.8829	43.2975	29.6215
Ciclev10005534m	0.679735	2.08079	15.8773	1.20546	3.07682	47.0468
Ciclev10005538m	306.229	148.054	76.6458	204.043	99.377	33.2755
Ciclev10005543m	2.99027	3.20038	2.27501	8.91605	4.54405	0.549794
Ciclev10005544m	47.0527	22.6959	12.3492	16.6071	23.3539	6.71485
Ciclev10005547m	32.1337	30.7978	14.2418	16.0731	16.348	18.0274
Ciclev10005548m	42.386	54.0821	60.9182	58.9858	34.0798	163.289
Ciclev10005552m	11.766	26.9768	17.0817	41.9789	46.294	31.0628
Ciclev10005561m	168.166	36.7348	34.0847	680.337	130.728	281.783
Ciclev10005563m	82.5059	33.32	24.9862	158.491	126.161	25.6651
Ciclev10005570m	171.908	479.043	1096.64	112.14	302.181	505.472
Ciclev10005574m	41.5425	78.8041	92.3437	11.1371	16.0245	81.7233
Ciclev10005587m	34.5977	36.3491	45.6427	88.0071	93.0261	94.4779
Ciclev10005594m	45.8711	88.7698	17.5638	84.3712	76.2375	70.7705
Ciclev10005596m	44.3607	28.1312	5.47102	49.0901	31.7262	1.29411
Ciclev10005598m	265.365	239.611	394.823	491.686	583.321	1546.87
Ciclev10005606m	8.89	9.80001	9.79248	5.87224	14.8255	25.8274
Ciclev10005613m	816.779	1509.28	792.762	565.997	784.944	569.867
Ciclev10005624m	173.075	932.016	185.415	233.602	374.338	74.6699
Ciclev10005637m	80.6408	152.457	133.229	44.9773	141.249	127.829
Ciclev10005641m	16.6128	26.6813	55.1447	16.0601	29.8422	79.1268
Ciclev10005650m	24.9579	22.1071	17.8742	47.7854	67.6835	61.6014
Ciclev10005652m	6.03906	5.3973	7.28193	18.0932	12.9974	1.07543
Ciclev10005658m	61.4872	73.1251	79.1825	153.205	125.114	74.2272
Ciclev10005675m	103.101	121.912	69.6752	42.9823	40.6571	24.7902
Ciclev10005680m	73.3594	59.7107	23.5976	60.0447	56.7472	47.8947
Ciclev10005684m	20.7705	33.0027	27.035	0.0977049	0	0
Ciclev10005687m	1.58335	0.824171	18.1619	3.38946	0.882094	25.0807
Ciclev10005694m	109.324	241.481	494.101	117.486	240.812	520.236
Ciclev10005696m	10.9601	21.0696	16.0586	0	0	3.63334
Ciclev10005701m	46.8908	36.8719	50.0885	21.386	63.3585	57.147
Ciclev10005712m	101.956	75.2437	106.164	52.6744	72.5632	85.0403
Ciclev10005716m	110.188	84.4057	111.691	214.142	181.869	198.493
Ciclev10005724m	59.4346	92.3468	52.4804	97.2946	119.505	36.879
Ciclev10005734m	51.9158	41.712	35.869	34.5723	8.96699	7.03337
Ciclev10005737m	0.568314	0.219753	0.127437	14.4201	1.54348	0.0975246
Ciclev10005750m	44.3291	54.7174	49.3003	101.437	50.2717	38.7508
Ciclev10005751m	9.46369	7.65359	28.0174	8.75859	6.21562	12.8434
Ciclev10005759m	101.545	90.8351	73.1214	83.5833	52.5679	37.7962
Ciclev10005771m	16.0688	22.6481	26.5429	5.52198	5.10814	4.63086
Ciclev10005779m	24.5778	22.6128	23.8096	3.17636	1.85419	1.94233
Ciclev10005780m	3.24314	4.43503	5.23253	22.2073	9.09448	22.7364
Ciclev10005783m	15.5622	14.1735	33.1658	18.5275	22.7045	43.9201
Ciclev10005795m	54.1362	23.8272	15.7736	30.4923	26.7973	11.6849
Ciclev10005805m	84.5804	6.31502	0	181.985	36.4177	5.21177
Ciclev10005808m	0	0.282673	0	24.7718	20.3836	20.8243
Ciclev10005809m	3.22592	24.2697	23.9027	28.7002	48.2505	88.0912
Ciclev10005812m	140.718	116.901	99.0422	49.4377	39.693	33.7358
Ciclev10005815m	2.95259	34.8713	33.5358	2.10147	7.78649	42.2963
Ciclev10005821m	60.089	18.8873	11.5729	26.6533	18.5778	0.73804
Ciclev10005827m	119.119	151.577	183.006	90.1088	130.318	177.893
Ciclev10005842m	389.885	342.745	146.355	238.377	280.796	139.827
Ciclev10005849m	13.84	4.7145	6.94581	22.0088	21.9562	15.6071
Ciclev10005858m	15.6441	27.5606	40.6534	17.3522	23.6926	28.2258
Ciclev10005863m	63.3507	41.6171	13.2891	171.615	138.26	12.9753
Ciclev10005869m	0.275746	0.26656	2.16414	0.564246	0.499265	14.4323
Ciclev10005873m	22.6451	37.0802	3.79976	27.3612	19.9427	7.79837
Ciclev10005883m	27.6717	8.44734	1.45147	62.5174	27.1021	5.13733
Ciclev10005888m	18.0527	20.1888	79.3742	2.89728	1.76249	7.5929
Ciclev10005892m	44.1614	45.7396	5.01026	21.0853	6.66322	0.902172
Ciclev10005894m	282.376	253.227	125.046	454.207	248.722	118.094
Ciclev10005897m	755.579	1483.46	1195.63	878.545	1839.12	3684.6
Ciclev10005900m	288.919	253.208	177.811	215.335	262.137	115.115
Ciclev10005901m	0.107378	3.63303	9.63123	0.527333	5.92975	7.73908
Ciclev10005911m	71.527	44.3804	31.1422	37.6949	44.9495	28.6482
Ciclev10005917m	34.7636	44.0461	86.2779	35.6366	37.5824	110.623
Ciclev10005926m	841.661	717.799	92.6391	464.402	222.412	11.641
Ciclev10005931m	249.032	329.712	335.991	192.538	337.314	478.947
Ciclev10005932m	44.5354	23.8461	13.7538	68.7572	20.5211	4.69071
Ciclev10005946m	398.463	46.0862	0.659899	309.161	140.535	12.4989
Ciclev10005954m	106.571	38.2651	3.82357	134.881	27.2347	1.46304
Ciclev10005965m	16.3607	21.7466	106.239	0.278984	0.771423	10.5283
Ciclev10005967m	1.03405	0.499801	0.57968	16.6453	7.95704	7.39358
Ciclev10005968m	1812.94	1565.11	2036.56	1834.59	723.37	308.215
Ciclev10005970m	466.149	337.931	763.386	355.275	497.05	633.718
Ciclev10005974m	0.692133	1.60579	6.36329	36.8233	19.1736	114.615
Ciclev10005979m	42.6602	13.3479	1.38638	30.7004	9.88829	0
Ciclev10005986m	30.5486	18.7498	21.2028	1.05837	2.19489	5.26999
Ciclev10005995m	61.9796	25.6778	89.5224	92.0135	65.2709	190.063
Ciclev10005998m	7.21691	4.21497	2.52859	52.425	5.17232	1.93507
Ciclev10006004m	29.3116	0.62967	0	0	0	0
Ciclev10006006m	0.801587	0.154977	3.59491	1.3122	2.90271	290.929
Ciclev10006010m	78.8984	46.8407	11.0798	103.847	69.9837	9.43643
Ciclev10006012m	109.306	66.144	41.0427	64.6853	52.652	27.1526
Ciclev10006024m	334.662	435.528	232.125	132.706	189.066	188.759
Ciclev10006032m	176.044	71.7804	170.976	56.7355	34.2127	110.313
Ciclev10006037m	16.3117	6.94559	1.0886	7.78818	0	0.333232
Ciclev10006039m	59.8659	73.3041	64.2733	29.2517	62.7366	74.4028
Ciclev10006044m	4.74023	7.2008	7.5924	14.6327	30.7749	15.804
Ciclev10006049m	963.36	891.637	407.146	751.611	840.826	270.269
Ciclev10006057m	44.1637	44.8348	0	0	0	0
Ciclev10006071m	2484.97	5015.98	1528.79	2234.79	3690.08	1389.93
Ciclev10006077m	146.403	191.49	181.558	46.5776	54.0525	57.7833
Ciclev10006092m	8.4675	15.837	16.5107	39.7759	23.3302	424.07
Ciclev10006094m	70.6267	72.1254	13.9421	33.3014	37.3793	9.21932
Ciclev10006096m	205.832	174.28	169.108	162.871	41.2735	8.28501
Ciclev10006097m	642.062	807.172	60.9999	1015.38	904.553	66.9059
Ciclev10006103m	35.6858	21.229	6.15545	30.2236	29.3403	7.82571
Ciclev10006105m	0	0	0	0	1.47421	47.0395
Ciclev10006124m	78.0054	73.3225	95.8489	68.4155	57.4132	135.275
Ciclev10006128m	14.8428	26.1459	119.942	8.72916	16.5227	285.083
Ciclev10006135m	67.3159	29.6446	0.838596	42.6501	17.8309	1.17656
Ciclev10006148m	30.7856	23.84	7.42287	19.3727	8.99037	0.994095
Ciclev10006149m	8.74498	4.31677	471.88	14.9247	9.09593	521.402
Ciclev10006155m	340.503	276.528	296.288	389.889	386.612	592.157
Ciclev10006161m	14.3948	9.70239	1.03646	11.3498	9.32536	2.49286
Ciclev10006172m	65.7138	66.2337	58.5964	30.7353	49.5967	53.9792
Ciclev10006173m	185.711	126.122	65.4961	56.4727	72.9957	24.4058
Ciclev10006176m	874.456	770.68	398.665	393.638	337.724	174.032
Ciclev10006177m	162.875	196.028	144.204	61.0979	79.2208	71.9891
Ciclev10006192m	321.906	86.8963	25.877	371.193	242.118	41.8644
Ciclev10006194m	8.06078	35.8769	71.9245	5.91049	8.36163	30.5469
Ciclev10006198m	41.0608	43.7505	32.635	30.6956	69.6361	66.3123
Ciclev10006201m	410.809	432.255	821.423	471.023	389.881	804.936
Ciclev10006214m	176.195	170.739	73.2101	174.706	126.173	68.1496
Ciclev10006215m	6.94054	2.176	0	29.0184	7.30218	0.160949
Ciclev10006220m	0.194187	0.187719	2.39492	0.158943	1.75798	83.1414
Ciclev10006235m	132.224	18.0892	15.8342	59.2422	16.1414	5.60436
Ciclev10006241m	52.8412	62.4714	275.25	579.756	235.556	319.768
Ciclev10006243m	158.976	53.0401	226.351	386.048	182.608	392.313
Ciclev10006246m	13.5261	5.68109	2.51012	23.3639	8.27605	7.8438
Ciclev10006252m	75.0591	44.0614	5.33916	32.6669	24.6348	3.11309
Ciclev10006253m	411.892	602.682	298.513	229.703	441.938	73.5963
Ciclev10006262m	24.7538	4.45195	0.322717	26.3864	2.86635	0
Ciclev10006265m	18.8168	14.62	102.726	81.1823	73.3933	60.054
Ciclev10006284m	1.15214	1.36126	1.00471	36.359	99.5517	4.83295
Ciclev10006290m	64.0404	122.868	93.9784	53.3789	185.983	233.402
Ciclev10006291m	414.291	371.884	322.233	196.523	264.651	222.553
Ciclev10006298m	36.1602	16.6367	2.16804	46.5325	14.1797	2.82055
Ciclev10006301m	12.9658	9.56785	11.5409	18.3086	10.0355	4.84059
Ciclev10006302m	11.4894	13.0383	1.68023	41.9096	16.2804	0.214307
Ciclev10006304m	34.2897	19.6813	9.34429	46.7769	20.8027	4.39273
Ciclev10006308m	12175.2	15384.6	13312.3	3640.25	8311.92	3972.65
Ciclev10006325m	160.191	37.8746	0	110.684	8.68027	0.141843
Ciclev10006350m	11.8831	10.7953	16.2126	89.6465	54.5666	72.5999
Ciclev10006362m	8.13677	9.39516	28.889	11.8399	15.5509	517.018
Ciclev10006368m	9.24342	8.2771	26.8363	55.1902	61.4833	5.67694
Ciclev10006385m	45.8713	198.167	917.608	266.214	738.809	2278.78
Ciclev10006390m	141.541	144.51	154.239	56.7999	123.986	108.592
Ciclev10006402m	15.3003	21.1999	119.51	12.6625	16.4678	188.896
Ciclev10006421m	30.9972	24.5544	12.3086	29.1593	33.3233	9.51181
Ciclev10006433m	1.20941	4.34246	24.2139	0.28283	4.22311	28.4625
Ciclev10006449m	291.391	154.312	101.684	110.248	134.332	111.795
Ciclev10006451m	1.29095	0.665569	0.289478	9.79153	2.18156	3.69218
Ciclev10006475m	28.5009	49.2482	57.1192	27.3375	29.0271	37.7512
Ciclev10006522m	8.52674	8.59196	1.05323	5.55966	0.850426	0.186002
Ciclev10006552m	0	6.09779	88.9095	0	0	0
Ciclev10006578m	43.5835	2.45904	0	17.6283	0.921154	0
Ciclev10006602m	0.129276	0.937273	3.18874	0.370344	1.98957	19.9103
Ciclev10006738m	14.4221	6.17038	3.36551	17.3397	7.30906	4.38138
Ciclev10006791m	330.625	147.915	134.274	23.0124	24.4738	13.6854
Ciclev10006828m	1.30685	4.21106	20.1468	1.42621	12.0281	20.2769
Ciclev10006846m	8.77473	1.16633	0.491905	2.6933	0.794376	0.0941108
Ciclev10006856m	179.74	106.996	80.6628	124.469	113.489	72.8778
Ciclev10006881m	267.48	260.168	288.774	148.301	243.048	288.793
Ciclev10006902m	0.636533	0.86146	8.27859	0.729404	4.72527	36.4832
Ciclev10006920m	87.1058	136.896	206.708	208.64	238.022	193.265
Ciclev10006927m	1.86603	4.43236	7.05359	1.87646	5.50234	8.73735
Ciclev10006961m	16.1739	1.33471	0	39.3923	7.32113	0.338476
Ciclev10006969m	29.3694	18.4016	17.0741	0	0	0
Ciclev10006974m	7.32658	7.08252	403.255	77.4134	177.275	509.193
Ciclev10006980m	11.4079	27.7273	77.8388	0.533566	0	9.22887
Ciclev10006984m	12.9763	4.70401	20.6108	17.7018	13.7053	75.6175
Ciclev10007003m	171.451	171.641	104.195	189.47	205.878	93.7066
Ciclev10007064m	82.8195	60.1612	47.7699	10.5796	22.5363	12.3226
Ciclev10007068m	0.64127	0	63.0308	23.6196	4.64433	335.451
Ciclev10007136m	147.979	333.782	357.183	63.81	203.453	90.8391
Ciclev10007157m	14.9279	35.1847	42.3124	25.6725	30.3689	24.4654
Ciclev10007177m	8.72839	22.2134	1.99717	72.7542	38.5415	13.2206
Ciclev10007213m	65.8076	66.3474	51.8289	123.919	79.8605	49.7091
Ciclev10007215m	17.1321	40.2206	56.939	14.3566	13.1094	9.62478
Ciclev10007237m	3.32498	5.21761	32.6577	4.77195	14.4114	36.9313
Ciclev10007238m	11.9569	17.4568	16.8815	8.41737	16.66	10.6814
Ciclev10007245m	15.2775	13.1493	11.3653	7.82427	5.67347	3.71692
Ciclev10007249m	10.0479	8.32181	1.09611	11.5139	8.67838	1.53784
Ciclev10007266m	3.88334	4.44916	3.2574	1.45976	0.598952	0.0740438
Ciclev10007271m	3.42359	2.71856	1.12413	5.78457	1.37258	1.07009
Ciclev10007273m	13.5183	11.2891	23.6871	15.7861	17.2039	21.953
Ciclev10007292m	5.94079	6.67853	4.49038	7.62162	9.48737	0.945004
Ciclev10007305m	7.98788	11.5298	18.9342	7.73226	9.9721	14.9906
Ciclev10007309m	13.6877	6.74069	5.91521	16.9712	15.6647	6.58438
Ciclev10007312m	0.589021	3.82311	33.7277	1.48078	1.86634	16.8584
Ciclev10007313m	10.0893	23.1109	34.1328	18.7065	24.026	27.2502
Ciclev10007320m	26.2029	26.1228	27.2889	83.7445	42.2466	28.463
Ciclev10007324m	15.6115	10.3361	20.3759	27.1778	25.39	32.5347
Ciclev10007331m	4.78561	1.87342	0.931212	5.14717	2.1125	0.780504
Ciclev10007334m	0.045086	0.0871682	1.87034	0.110709	0.0816326	3.32687
Ciclev10007337m	46.5725	27.5556	7.56692	11.2197	6.98273	0.575481
Ciclev10007338m	2.87911	5.40961	12.4574	8.66283	14.7944	35.3152
Ciclev10007341m	0.0923772	13.2164	43.1378	0.113416	2.63431	20.8853
Ciclev10007350m	15.1547	19.9307	12.8027	36.4914	24.8867	13.0937
Ciclev10007364m	13.1655	10.9088	28.0587	25.4476	27.5555	37.9065
Ciclev10007366m	33.0406	18.7959	0.711419	26.1905	9.64229	0.311104
Ciclev10007367m	7.36253	9.4772	3.56258	7.32663	9.19108	16.2584
Ciclev10007376m	3.35934	5.09667	5.80661	13.7863	10.6442	6.52537
Ciclev10007378m	16.6064	14.4777	14.2235	53.7566	40.4357	35.9805
Ciclev10007387m	0.28061	3.75246	0.052436	2.02884	2.66738	8.18611
Ciclev10007397m	3.50843	1.3324	0	5.09377	1.17216	0
Ciclev10007403m	7.17806	9.86291	11.7935	24.24	22.6419	8.94783
Ciclev10007406m	0.0970936	0.328507	1.0886	0	0.0439494	4.20705
Ciclev10007426m	1.45818	2.33313	6.8778	0.164623	0.955924	4.52999
Ciclev10007428m	1.34172	1.16285	9.75211	25.3343	18.6806	16.9507
Ciclev10007429m	27.5075	17.6329	6.39387	13.0079	13.7799	7.12374
Ciclev10007435m	8.33759	9.18553	7.46795	12.1237	11.6804	18.424
Ciclev10007447m	27.0555	27.6001	57.857	24.5935	23.0596	38.1994
Ciclev10007452m	0.793894	0.682176	0.989004	7.68934	4.67163	3.33019
Ciclev10007455m	9.08297	6.92637	10.1837	14.78	19.0337	11.2398
Ciclev10007457m	5.31839	1.46892	0.113579	11.0279	4.31034	1.26033
Ciclev10007465m	6.33975	7.99939	13.3931	2.34875	5.67896	14.6583
Ciclev10007466m	8.74694	3.36354	0.433456	10.2446	9.62481	1.11953
Ciclev10007469m	0.149808	0.627542	3.1353	0.245235	1.08497	6.29834
Ciclev10007470m	109.228	192.661	234.191	196.805	206.155	239.064
Ciclev10007483m	54.9817	36.7825	24.9291	96.7823	51.2067	15.1663
Ciclev10007502m	1.956	5.09073	8.04115	3.11988	4.2226	9.63936
Ciclev10007508m	13.1613	8.93152	7.73752	10.7725	7.47669	4.07699
Ciclev10007510m	59.2975	6.4396	3.16858	84.3477	4.43162	2.20833
Ciclev10007516m	19.3347	3.18433	0.642304	4.64995	0.907598	0.122885
Ciclev10007520m	0.914134	2.59907	13.5048	5.32557	6.13372	27.775
Ciclev10007524m	76.0127	58.5427	107.315	63.6491	70.7609	316.404
Ciclev10007531m	13.2369	9.96645	21.8941	23.8857	26.4978	23.9144
Ciclev10007536m	28.9686	14.5275	30.3177	51.6703	25.1065	100.228
Ciclev10007545m	15.1282	36.0384	44.7718	57.7714	56.5609	48.8445
Ciclev10007548m	9.36351	6.55779	4.07075	12.7473	8.95252	2.82831
Ciclev10007552m	0.0866853	0	6.17159	0.425712	1.17714	14.8755
Ciclev10007562m	16.5158	8.35316	7.0633	21.3225	14.2967	6.46453
Ciclev10007564m	9.65163	6.87218	0.930862	9.3864	5.1674	0.178092
Ciclev10007570m	49.9927	20.3644	1.88012	108.474	51.0936	11.8702
Ciclev10007572m	0.514451	0.149194	0.0576796	9.72693	3.16698	2.20704
Ciclev10007581m	13.5134	15.0492	17.4032	7.17452	13.6802	16.2169
Ciclev10007586m	0	3.31993	24.0833	0.153328	5.25721	16.2873
Ciclev10007591m	0.168001	0.21654	1.38131	1.05424	0	7.83203
Ciclev10007592m	20.8357	26.9679	27.9546	17.9103	11.207	38.111
Ciclev10007602m	0.943493	0.277584	1.19581	2.2496	1.03983	5.73712
Ciclev10007624m	6.09956	5.1176	10.1936	4.99249	7.55358	14.8119
Ciclev10007635m	16.1942	13.7516	26.3806	13.5409	12.3034	25.8554
Ciclev10007637m	17.0172	15.2057	17.9498	11.6835	8.66569	6.7722
Ciclev10007641m	13.1211	10.0009	8.48726	23.4621	7.40126	6.06209
Ciclev10007645m	3.77882	0.887143	0.0605252	7.29057	2.05258	0
Ciclev10007651m	21.5167	28.5218	3.20966	28.4957	9.32151	1.58469
Ciclev10007657m	5.11825	7.83395	12.6128	5.58573	10.3772	32.7079
Ciclev10007659m	14.4675	14.9249	25.5416	24.6996	24.973	47.3375
Ciclev10007668m	22.5664	13.682	26.4664	50.0247	19.3989	20.9759
Ciclev10007670m	19.3609	13.6116	40.0596	19.3044	18.1116	152.226
Ciclev10007673m	37.2197	27.6619	7.79637	25.8374	11.3222	4.97913
Ciclev10007687m	5.07649	3.29018	6.98526	8.07415	9.71374	2.27685
Ciclev10007694m	31.7399	16.4009	11.8621	24.9649	9.3623	2.61702
Ciclev10007702m	9.98505	17.2593	49.377	26.142	23.5265	47.2622
Ciclev10007703m	16.9621	18.4467	14.0756	15.2079	10.5066	5.12255
Ciclev10007708m	22.4938	18.8869	10.6679	26.9553	26.0086	14.0689
Ciclev10007718m	8.60484	1.19732	0	5.33566	2.18355	0.0559325
Ciclev10007723m	2.85648	1.77952	9.2521	5.19563	1.66652	39.5958
Ciclev10007726m	10.6017	8.41665	15.3892	14.4625	18.0826	30.2774
Ciclev10007739m	1.20434	0.651965	1.72837	6.54541	7.80647	3.84404
Ciclev10007747m	63.2179	76.2937	115.537	89.9347	106.066	202.077
Ciclev10007763m	0.066541	0.385946	15.5178	1.9607	6.02395	31.1159
Ciclev10007776m	3.67085	3.28765	2.78416	17.5857	8.35693	2.96438
Ciclev10007787m	11.2155	4.84105	0.99428	5.46526	5.6198	0.179035
Ciclev10007792m	114.933	111.951	62.7618	94.1684	118.634	41.9199
Ciclev10007801m	1.90401	0.920294	8.28787	2.29182	0.253486	4.13224
Ciclev10007803m	26.1398	10.3685	14.1759	15.2326	12.218	21.4532
Ciclev10007806m	1149.05	779.952	239.009	916.199	291.45	35.6264
Ciclev10007809m	25.4397	27.1256	113.804	44.3131	29.743	126.743
Ciclev10007810m	225.154	190.774	165.283	149.969	152.736	71.8589
Ciclev10007823m	134.11	101.964	65.5648	135.398	84.4617	42.4601
Ciclev10007844m	13.6246	14.9727	9.19584	7.98932	5.9524	9.50915
Ciclev10007846m	16.09	6.61278	6.21134	13.4063	15.9182	15.2522
Ciclev10007847m	6.47508	5.63345	8.29688	10.1076	15.1572	14.3655
Ciclev10007853m	13.1575	11.6321	21.0563	12.8865	7.63558	28.0305
Ciclev10007864m	10.3895	8.96957	0	13.2638	4.14083	0.0560651
Ciclev10007869m	2.78807	1.42687	2.57431	8.81494	6.28536	1.68862
Ciclev10007876m	44.5961	27.7803	12.3924	31.3885	39.8942	5.40152
Ciclev10007880m	29.3641	18.3997	11.7646	22.3701	16.0531	10.8875
Ciclev10007882m	51.2168	33.9122	34.3067	85.3095	91.7051	28.9718
Ciclev10007886m	31.2756	28.5192	47.5941	37.6003	46.8864	73.3525
Ciclev10007908m	55.5437	56.905	32.8834	58.0816	56.017	17.0587
Ciclev10007916m	19.5248	18.7455	22.1898	72.2147	32.4559	87.7081
Ciclev10007936m	6.41427	6.13533	9.31121	11.1081	7.51832	20.6818
Ciclev10007938m	0.726497	0	0.543026	8.52315	4.67696	3.60156
Ciclev10007940m	2.97721	2.74098	0	9.45728	1.4118	0
Ciclev10007953m	53.2181	28.7254	2.60153	63.8989	11.5194	0.578
Ciclev10007965m	10.0114	7.46751	8.45312	18.412	5.14706	12.1956
Ciclev10007969m	8.29005	7.29133	17.6751	10.8455	12.0572	39.5879
Ciclev10007977m	60.7811	75.7965	54.1239	37.1774	58.8656	71.5432
Ciclev10007989m	43.3963	42.4459	47.5887	17.1909	19.014	19.5279
Ciclev10007993m	26.7156	15.5517	27.9944	57.1396	5.27207	1.56147
Ciclev10007994m	9.91775	19.4105	25.8851	11.9769	22.9615	103.092
Ciclev10007997m	13.6177	11.4751	10.2555	20.3154	18.1433	8.99465
Ciclev10008006m	49.2447	26.1113	23.5546	56.8507	27.3919	16.7119
Ciclev10008008m	21.0043	28.4141	7.68239	26.8364	30.6099	8.90115
Ciclev10008009m	33.244	6.2673	0.0773293	18.0649	4.80783	0.35507
Ciclev10008010m	108.418	47.5037	76.8377	54.1099	28.1951	18.7814
Ciclev10008031m	16.2797	8.00795	20.7562	4.42199	8.15154	16.8113
Ciclev10008037m	7.50927	10.3982	36.2561	10.6869	27.6825	23.7988
Ciclev10008039m	3.4084	3.10104	3.29693	9.79157	17.4247	31.3663
Ciclev10008040m	18.2043	20.7355	24.5242	12.2436	19.0993	30.1495
Ciclev10008054m	19.2609	16.0236	11.637	23.6265	26.2255	11.9183
Ciclev10008071m	4.6474	5.06856	16.5671	3.60883	16.6134	21.8293
Ciclev10008080m	10.4129	4.08696	2.10673	9.03562	3.68566	0.201529
Ciclev10008085m	27.3728	11.3776	1.50811	20.7532	8.76759	0.807884
Ciclev10008086m	8.569	11.6288	10.9008	9.44156	12.2827	22.2927
Ciclev10008097m	71.272	81.3538	1387.35	102.368	212.523	2361.94
Ciclev10008099m	3.66359	2.302	7.73591	3.84827	5.25135	17.0792
Ciclev10008104m	30.9997	21.3053	6.40038	41.52	21.1298	1.05401
Ciclev10008109m	3.09381	4.06436	2.04567	12.5316	1.65177	7.07878
Ciclev10008115m	92.1522	78.6055	109.229	97.822	84.7121	182.273
Ciclev10008119m	6.86724	13.9335	18.9525	9.94456	11.9556	17.5471
Ciclev10008121m	11.9223	13.2636	14.9354	18.263	29.1238	24.5738
Ciclev10008122m	6.56142	0.722603	0	3.60302	0.150381	0
Ciclev10008123m	14.6628	17.6835	21.4674	11.5937	16.3672	31.0859
Ciclev10008125m	1.22178	0.635965	0.632234	10.4618	1.61657	5.16089
Ciclev10008130m	41.4175	27.6771	9.19385	20.5335	13.9663	7.87059
Ciclev10008147m	44.1924	45.6036	78.758	57.3961	37.1418	84.2966
Ciclev10008171m	8.80912	8.6477	45.938	16.1533	14.5279	85.5444
Ciclev10008172m	27.0309	37.2434	58.0877	31.4706	34.1751	50.7845
Ciclev10008176m	5.70095	2.90055	4.87797	4.66623	5.09316	17.249
Ciclev10008181m	62.8639	26.2991	39.8709	38.4117	34.8325	42.6837
Ciclev10008184m	16.9703	8.24329	1.51457	25.7763	7.33764	0.289767
Ciclev10008192m	22.9907	34.9542	46.3664	105.8	74.9413	92.2805
Ciclev10008193m	28.6636	20.6303	15.9984	39.1361	24.306	3.70518
Ciclev10008198m	0.0838134	0.324086	6.85984	0	0	0
Ciclev10008202m	21.8375	6.32566	20.7303	9.27954	7.3705	3.00313
Ciclev10008211m	10.3873	15.269	13.4471	6.70521	18.1771	24.3945
Ciclev10008218m	84.0034	60.987	50.0615	116.791	63.4047	51.5337
Ciclev10008224m	54.3501	64.8548	124.409	52.1364	67.97	92.6846
Ciclev10008225m	256.028	244.54	149.724	518.153	331.852	210.577
Ciclev10008234m	8.17429	0	0	0	0	0
Ciclev10008243m	9.58567	9.87672	10.876	0.798683	1.40301	1.42824
Ciclev10008255m	122.05	162.718	469.501	275.892	110.005	212.925
Ciclev10008257m	165.622	33.8036	3.21841	78.8164	12.4423	1.94052
Ciclev10008260m	31.0557	18.0825	28.7461	43.2717	54.8564	38.0485
Ciclev10008261m	1.85064	0	0	9.08852	0.209423	0
Ciclev10008268m	23.203	16.4975	29.6909	18.6476	18.8747	44.0008
Ciclev10008269m	147.337	159.074	131.031	149.932	124.65	64.3877
Ciclev10008287m	65.9608	20.0674	12.6302	21.3404	10.9038	15.0151
Ciclev10008293m	19.4363	0.555334	0	0	0	0
Ciclev10008296m	0.0791464	0.841608	0.887378	2.97994	0.501558	10.458
Ciclev10008306m	4.22599	1.53196	0	5.5728	2.23171	0.201443
Ciclev10008310m	14.8828	6.92711	1.54504	25.7168	8.23376	1.00502
Ciclev10008325m	0.57653	0.875796	2.95496	7.68507	2.16229	4.73472
Ciclev10008331m	2.02094	3.90724	6.96539	1.96046	2.77821	15.9913
Ciclev10008343m	34.2952	20.8134	13.4493	33.9869	41.4894	19.4633
Ciclev10008345m	48.0252	94.8208	98.9479	50.9127	71.0715	81.3484
Ciclev10008348m	12.5339	14.7986	34.3276	7.753	13.0793	34.1511
Ciclev10008350m	10.756	12.7179	20.9298	6.76659	13.9221	24.9408
Ciclev10008355m	228.579	235.52	337.977	256.732	87.8641	542.559
Ciclev10008366m	2.96501	0.843012	1.75994	46.6101	6.71055	1.27201
Ciclev10008369m	0.928959	4.04106	0.260384	11.8488	7.63895	0.199266
Ciclev10008378m	526.203	270.773	146.892	439.001	330.278	157.525
Ciclev10008382m	5.67911	5.70735	11.9782	10.8615	13.3368	25.2323
Ciclev10008387m	3.37001	1.43724	0.666778	9.49199	4.12764	1.02054
Ciclev10008390m	6.98872	2.58314	3.91783	11.3564	6.09427	3.17458
Ciclev10008397m	6.19484	11.3927	5.08212	24.4867	7.11282	7.51917
Ciclev10008422m	39.3514	43.712	48.3718	33.2047	43.2032	62.0647
Ciclev10008439m	6.48976	14.9498	9.36622	8.64593	11.6254	26.9531
Ciclev10008447m	39.0917	20.3935	16.6377	24.1107	31.6302	10.9271
Ciclev10008448m	26.0998	82.4992	109.805	20.2098	51.0817	77.4904
Ciclev10008452m	14.0485	7.0514	0.706773	47.2478	7.8265	0.38634
Ciclev10008459m	55.9588	167.348	158.052	7.4713	13.6529	205.471
Ciclev10008463m	58.5128	17.528	3.43732	28.0331	15.6219	5.03553
Ciclev10008480m	57.5989	15.2656	4.19934	15.9911	3.84896	7.73015
Ciclev10008496m	66.5502	76.9778	135.853	101.058	104.974	165.92
Ciclev10008515m	25.8381	33.9773	13.0186	31.5943	47.7295	20.1949
Ciclev10008520m	15.9151	10.9534	0.96977	11.469	4.69823	0
Ciclev10008523m	19.3005	22.6735	8.53933	31.6658	12.3798	11.956
Ciclev10008531m	75.1253	76.445	29.3936	70.1438	74.2361	18.8804
Ciclev10008537m	12.7432	5.1659	0.460886	6.52735	4.76341	2.04569
Ciclev10008555m	6.67244	8.06271	10.4084	6.05503	16.4146	22.1535
Ciclev10008562m	46.474	42.0189	90.0106	43.9314	66.8217	78.5782
Ciclev10008567m	2.49941	0.587713	2.65083	6.96668	7.58316	3.41967
Ciclev10008583m	12.7076	11.8025	30.5438	12.7125	16.0908	32.8525
Ciclev10008603m	8.37349	4.22546	11.4548	28.1045	10.7271	10.7091
Ciclev10008610m	44.7783	40.1871	40.5357	81.1754	91.4853	48.1917
Ciclev10008617m	17.5855	16.303	47.3521	9.85144	24.4021	34.0113
Ciclev10008633m	54.4701	50.7408	53.2191	109.838	77.5539	31.8049
Ciclev10008642m	517.475	570.781	824.469	21.7765	19.7848	15.3273
Ciclev10008646m	76.5192	103.656	65.4025	32.6032	70.697	35.473
Ciclev10008648m	20.0517	14.5713	17.1326	35.2017	36.4934	19.2218
Ciclev10008653m	111.084	103.972	268.067	198.651	44.3646	299.838
Ciclev10008655m	22.8814	29.3846	16.9468	7.65543	18.7489	15.1186
Ciclev10008659m	21.8986	19.6503	17.9464	28.8553	54.1404	28.6475
Ciclev10008661m	5.80715	5.6137	1.57522	10.043	4.23968	1.28584
Ciclev10008665m	0.099908	0	0.560077	12.1027	10.4918	15.773
Ciclev10008677m	13.6595	32.9638	72.4978	28.2324	42.1689	152.783
Ciclev10008680m	42.7816	20.448	19.2292	24.8003	6.72818	4.7417
Ciclev10008681m	402.845	476.388	115.69	229.355	298.322	39.232
Ciclev10008684m	8.66434	16.1532	7.63269	7.54204	40.5264	16.9333
Ciclev10008687m	170.57	161.577	136.688	31.3505	30.376	27.1863
Ciclev10008695m	90.1373	69.8301	40.4445	66.2295	35.8489	12.7218
Ciclev10008697m	42.7565	51.746	38.6687	21.1208	27.2162	22.9286
Ciclev10008705m	886.587	572.149	163.779	724.136	224.133	27.8995
Ciclev10008711m	12.5174	4.20885	0.711887	13.2895	5.00908	0
Ciclev10008717m	0	1.47	10.2296	0.0829773	1.5602	14.0913
Ciclev10008721m	20.0123	17.6518	32.8808	21.4376	22.2081	43.679
Ciclev10008731m	11.22	4.04436	1.3859	15.2541	1.03296	1.22377
Ciclev10008732m	36.2108	44.4541	59.3737	31.5866	49.788	60.3885
Ciclev10008748m	28.7306	104.192	424.384	76.1836	150.518	281.011
Ciclev10008754m	79.9432	92.451	206.069	42.243	54.4462	36.3297
Ciclev10008765m	872.071	2091.67	2560.86	815.141	1735.33	2702.82
Ciclev10008768m	2.75177	4.67811	12.6601	9.86362	4.20922	24.7504
Ciclev10008778m	0	0	0.647325	0.189027	0.418145	18.131
Ciclev10008781m	44.4226	39.4498	41.4653	60.4259	65.2303	128.996
Ciclev10008789m	13.6243	10.8065	6.65848	11.3421	4.00593	1.09905
Ciclev10008799m	16.9996	11.9515	18.3171	29.9064	20.2864	51.8084
Ciclev10008802m	13.5382	20.6254	2.67148	9.9286	11.5698	4.73933
Ciclev10008806m	51.4623	34.4338	8.93471	25.1474	22.1645	3.78947
Ciclev10008808m	15.6867	29.8716	14.7271	23.8229	9.41041	17.5946
Ciclev10008810m	13.4698	13.5791	28.6941	8.50503	8.10043	25.0959
Ciclev10008812m	8.49092	9.01542	123.368	389.304	77.8763	105.817
Ciclev10008813m	45.5344	40.3348	16.9836	51.3018	20.4469	5.68139
Ciclev10008821m	299.824	211.845	146.109	140.44	159.76	58.7991
Ciclev10008836m	29.8738	40.3696	20.4296	130.452	59.1161	8.6559
Ciclev10008839m	27.2061	45.7724	53.2944	19.1517	45.0895	36.8856
Ciclev10008842m	0.892382	7.1169	15.6332	0.182604	0.605904	2.39275
Ciclev10008860m	17.6508	20.1385	19.6199	19.7176	9.25835	7.21484
Ciclev10008862m	9.79852	30.1766	60.5686	11.3559	52.6741	57.1398
Ciclev10008863m	9.49719	23.638	35.8609	3.0379	22.3345	34.5619
Ciclev10008878m	72.715	55.6011	43.0229	54.3628	88.7093	31.4835
Ciclev10008889m	16.6123	20.8676	35.4621	21.6634	25.2352	47.3511
Ciclev10008898m	23.1542	16.1428	36.0296	29.2317	65.1713	55.1452
Ciclev10008902m	29.1184	26.9351	14.7756	13.9713	19.3729	20.7841
Ciclev10008914m	10.2597	0.407585	0.157575	0.460139	0.127234	0
Ciclev10008917m	137.519	139.268	135.432	72.7942	58.3224	78.2828
Ciclev10008922m	4.50942	0.556493	0.107572	7.14633	1.38974	0.164645
Ciclev10008931m	73.018	51.8553	67.5853	53.5244	48.8059	103.289
Ciclev10008947m	25.8452	12.7677	13.5299	55.2191	60.1286	20.9527
Ciclev10008951m	0.131936	0	1.62717	0.215979	0	38.2627
Ciclev10008969m	20.6664	21.1973	32.1999	15.1683	14.2296	67.3487
Ciclev10008993m	158.084	11.0038	21.097	11.5987	13.3544	128.562
Ciclev10008999m	7.28322	14.8999	22.7884	43.5315	16.4071	13.5155
Ciclev10009005m	0.60119	2.22779	8.98728	2.54239	5.7147	38.7733
Ciclev10009013m	18.2096	23.0381	18.3465	3.1595	4.55811	4.60805
Ciclev10009014m	10.8335	7.07128	0.311446	14.7788	5.61632	0.0794475
Ciclev10009025m	130.484	108.414	69.4252	157.484	83.1544	50.481
Ciclev10009028m	0	0.553413	0.213953	1.48383	2.59134	10.3971
Ciclev10009029m	42.1694	69.8685	48.8446	16.3195	36.1002	20.6999
Ciclev10009036m	88.2467	47.3928	37.5796	153.223	138.494	50.2206
Ciclev10009037m	204.375	195.963	40.3202	42.6581	84.5465	26.9634
Ciclev10009045m	12.0353	11.1926	10.9317	31.6726	21.1705	25.7509
Ciclev10009047m	13.4876	17.0435	40.9186	28.9338	24.5802	50.8285
Ciclev10009067m	27.2967	23.3063	5.86438	18.3288	15.7593	8.62512
Ciclev10009068m	35.808	30.1411	17.7523	16.8809	12.7169	8.01189
Ciclev10009070m	19.9078	2.95383	0	3.48627	0.586779	0.31779
Ciclev10009077m	36.5538	53.9572	146.872	40.8442	60.7375	83.8102
Ciclev10009083m	160.89	51.0317	27.8606	254.379	80.5501	77.1291
Ciclev10009087m	59.9327	21.2463	31.5789	48.3747	13.1254	10.3005
Ciclev10009090m	67.9823	95.2331	56.1627	83.5631	79.7917	28.0393
Ciclev10009114m	8.93811	6.05819	9.67573	5.2136	7.99866	27.5028
Ciclev10009122m	8.89744	6.36044	10.0595	21.4193	20.8478	17.8986
Ciclev10009133m	75.6888	61.2259	99.1808	96.3117	57.3378	114.255
Ciclev10009138m	28.434	69.3799	2.35767	67.5748	14.4847	0
Ciclev10009152m	30.5303	40.6342	50.5018	32.8842	52.9548	119.74
Ciclev10009158m	30.221	49.7432	32.7844	7.88875	6.35913	0.280325
Ciclev10009168m	11.8731	0.58559	0	6.54486	2.63233	0
Ciclev10009170m	10.3789	2.22959	0.143663	20.7659	5.22001	0.329825
Ciclev10009180m	280.057	490.662	952.563	556.527	326.149	1529.39
Ciclev10009186m	1.67509	5.48068	24.7041	2.74213	14.5813	10.7242
Ciclev10009189m	21.9014	23.9699	20.7695	46.2768	23.8452	23.4277
Ciclev10009191m	1.85844	1.45968	32.0362	21.7712	9.98951	106.039
Ciclev10009193m	39.863	58.5734	107.027	46.2012	31.0838	101.241
Ciclev10009203m	23.5999	19.6353	8.76534	13.9342	10.451	6.45714
Ciclev10009212m	5.7227	3.82989	5.92265	16.9346	25.4255	17.1478
Ciclev10009213m	17.5698	14.0178	9.4624	62.7987	47.5094	17.7742
Ciclev10009229m	33.5126	14.2888	21.4299	87.4007	40.2596	32.4716
Ciclev10009246m	35.1761	29.5827	10.8671	63.4665	40.7181	14.7638
Ciclev10009252m	0.47762	0.0769516	0	5.9943	0.288259	0
Ciclev10009261m	439.277	53.014	91.2425	127.451	276.749	322.672
Ciclev10009281m	105.132	147.408	268.009	174.235	183.584	260.118
Ciclev10009291m	92.754	10.9445	0	70.3591	2.80913	0
Ciclev10009294m	13.8781	5.14063	0.727099	0.849288	0	0
Ciclev10009298m	8.85314	1.82576	0	10.8212	3.41963	0.101282
Ciclev10009299m	38.9211	55.9585	46.5963	14.7136	14.9302	15.1409
Ciclev10009303m	15.0308	8.98221	15.3202	19.908	31.9154	23.6829
Ciclev10009304m	12.039	23.782	53.1703	32.1325	29.3797	72.218
Ciclev10009314m	22.3308	6.55318	4.80621	19.7466	9.38604	4.44791
Ciclev10009327m	4.5588	5.83622	8.28854	7.05938	7.36182	23.3635
Ciclev10009328m	52.5921	49.1837	43.3005	79.8359	74.5795	111.851
Ciclev10009331m	75.2983	163.021	413.932	105.508	183.353	39.8202
Ciclev10009334m	22.633	26.4372	19.5606	52.9511	51.6511	38.4345
Ciclev10009335m	31.0465	22.6705	15.3458	22.8841	29.9952	11.529
Ciclev10009338m	35.781	29.0407	21.4962	42.4809	33.9403	18.8605
Ciclev10009342m	17.4503	16.717	20.4463	0	0	0
Ciclev10009352m	142.298	46.12	88.3765	93.2675	55.2096	17.2047
Ciclev10009355m	40.347	40.319	61.0554	28.5668	31.2601	59.6796
Ciclev10009360m	76.1488	61.7759	46.6377	78.6649	84.2738	29.7902
Ciclev10009361m	58.1459	54.1552	55.0375	84.1106	64.1797	133.552
Ciclev10009370m	34.4682	15.8711	13.2406	11.3949	9.90882	4.20137
Ciclev10009387m	55.6071	6.9565	0	22.0879	7.10698	0
Ciclev10009394m	15.0999	11.4485	26.5566	56.8689	16.6184	76.635
Ciclev10009411m	74.0053	98.7351	180.724	101.544	111.623	250.947
Ciclev10009412m	65.4069	70.4786	114.39	48.3897	74.3905	107.887
Ciclev10009415m	302.287	494.636	255.913	293.156	502.427	151.377
Ciclev10009420m	12.9797	6.41306	0.646784	10.7419	3.0029	0.742452
Ciclev10009426m	32.1403	32.0376	49.5064	65.3984	69.6143	101.717
Ciclev10009440m	25.641	13.328	9.42569	33.2355	23.6694	10.9641
Ciclev10009443m	25.4003	31.242	56.7352	12.4579	45.1844	25.8643
Ciclev10009446m	0	5.45012	20.1128	4.89433	7.88802	21.1088
Ciclev10009449m	30.2187	18.6633	26.7047	35.8987	47.9697	41.5931
Ciclev10009470m	48.4718	21.981	7.0886	18.0668	6.62742	0.0951708
Ciclev10009471m	24.6518	21.9755	3.97211	29.6018	43.1645	11.1458
Ciclev10009474m	52.6883	57.9479	50.5838	69.8529	64.9787	98.1299
Ciclev10009478m	58.0718	77.0512	87.0251	51.9588	72.6735	100.142
Ciclev10009482m	31.5675	9.23724	0	11.8715	0.617903	0.146408
Ciclev10009484m	82.6981	18.6493	17.3039	261.806	140.302	35.5333
Ciclev10009485m	18.8533	1.98371	0.718983	25.0893	11.7269	1.21048
Ciclev10009500m	18.7346	34.8112	40.249	44.0745	48.2406	28.3952
Ciclev10009502m	24.1486	12.8795	4.66811	16.2604	21.754	13.5751
Ciclev10009510m	33.7877	26.1607	7.89962	118.092	55.8122	22.6702
Ciclev10009511m	55.4761	35.3183	10.5641	32.029	7.74662	3.95974
Ciclev10009513m	79.5118	68.5441	57.1441	197.821	72.5855	85.9541
Ciclev10009522m	0	1.34175	0.17291	15.6525	25.9685	10.7182
Ciclev10009526m	27.2941	22.0048	1.20956	28.8746	10.4502	0
Ciclev10009527m	0.9161	4.57551	31.8407	5.12383	23.4981	180.918
Ciclev10009529m	35.2698	16.9283	20.8782	82.6686	30.3668	6.24288
Ciclev10009532m	43.9537	102.285	294.483	21.3232	81.5176	346.524
Ciclev10009541m	105.966	25.1625	2.82426	47.009	17.6354	2.44952
Ciclev10009542m	320.156	336.719	248.844	484.638	475.009	587.776
Ciclev10009547m	85.6822	104.682	123.602	62.8209	54.5756	65.0156
Ciclev10009567m	121.719	17.2593	0.158871	407.904	25.5277	0
Ciclev10009569m	494.507	92.73	0.177476	332.847	110.199	0.271636
Ciclev10009581m	64.8112	45.6511	34.2026	52.8703	41.1796	23.4732
Ciclev10009584m	45.2921	24.8884	14.3742	43.8667	46.5207	26.148
Ciclev10009585m	77.4416	40.8928	33.8774	112.849	44.9825	76.4324
Ciclev10009588m	238.053	487.938	408.147	492.67	524.441	333.475
Ciclev10009593m	2.18846	0.813676	8.68222	16.1213	1.06681	18.0551
Ciclev10009622m	298.53	318.658	583.282	314.161	549.112	1301.15
Ciclev10009623m	16.0875	12.1412	1.89864	62.6041	19.4187	15.1353
Ciclev10009632m	48.6949	40.1094	18.091	27.947	41.8663	15.328
Ciclev10009639m	35.157	45.0185	34.5638	38.6543	27.0772	69.4476
Ciclev10009640m	90.2776	70.7958	260.447	34.0558	63.6591	236.858
Ciclev10009650m	61.9638	3.33548	5.15808	193.926	44.382	4.9342
Ciclev10009657m	13.9797	22.8126	39.2565	19.7355	32.0459	47.9792
Ciclev10009663m	153.33	231.473	192.182	134.086	113.821	65.9576
Ciclev10009669m	25.5932	12.1309	3.14716	24.8674	9.56676	3.68351
Ciclev10009681m	31.1962	12.9987	38.0925	82.3256	47.8814	85.3002
Ciclev10009684m	18.6723	8.38699	4.86371	10.4204	8.36662	3.96482
Ciclev10009692m	32.3645	34.1648	46.0115	21.9341	28.5964	60.7593
Ciclev10009695m	4.19006	31.4395	11.6327	20.904	19.6888	274.772
Ciclev10009699m	63.2881	84.0137	129.537	79.0154	78.5622	69.2821
Ciclev10009701m	14.831	7.5667	3.69517	80.0285	23.4963	2.47435
Ciclev10009718m	153.571	146.344	144.786	67.7095	102.572	131.415
Ciclev10009720m	1.69318	4.20885	6.23749	8.61217	27.372	11.3109
Ciclev10009724m	130.677	144.459	276.604	147.135	115.278	269.89
Ciclev10009727m	4.41465	7.05794	37.1223	3.6134	0.153715	1.45686
Ciclev10009728m	14.1902	0	0.392837	5.44888	0	0
Ciclev10009740m	177.226	100.918	521.501	366.844	77.5618	976.979
Ciclev10009756m	133.212	471.817	1533.71	824.683	1373.53	1210.76
Ciclev10009759m	177.18	114.282	77.5429	93.6931	74.428	67.1939
Ciclev10009767m	0	0.151973	7.93176	0.128676	10.2472	57.4626
Ciclev10009768m	170.082	239.456	134.317	264.769	215.439	84.8957
Ciclev10009769m	266.163	255.205	63.2535	67.3047	50.5142	4.11123
Ciclev10009779m	9.33869	17.5628	13.7067	2.08465	2.15201	0.437059
Ciclev10009784m	20.0001	48.746	8.3493	14.8027	64.7196	214.87
Ciclev10009800m	5.09782	2.912	7.53421	4.17257	10.6985	49.3071
Ciclev10009810m	20.9807	42.5694	48.339	19.5316	23.4813	119.88
Ciclev10009811m	0	3.94174	16.001	8.76093	14.9964	138.414
Ciclev10009817m	68.6361	53.7186	37.0456	62.0793	82.1232	36.8552
Ciclev10009827m	38.6684	27.67	18.0395	36.8888	38.2255	29.7459
Ciclev10009830m	141.062	176.256	148.377	61.1074	119.212	82.2448
Ciclev10009837m	0.203954	0	1.60069	0.166937	0	30.4493
Ciclev10009849m	286.892	317.506	238.517	12.4978	16.4478	19.0713
Ciclev10009854m	232.245	151.526	56.6328	297.939	195.117	76.0373
Ciclev10009863m	45.5457	61.6058	91.8383	59.2422	89.9764	73.1596
Ciclev10009866m	10.079	48.1647	52.2378	3.58004	2.75457	0.163169
Ciclev10009871m	15.162	15.4386	12.6929	49.9713	29.2824	22.5493
Ciclev10009885m	9.51518	7.25845	12.9906	8.90078	43.0704	16.7171
Ciclev10009891m	0	4.00843	9.87925	4.38387	7.66416	37.2088
Ciclev10009892m	6.14181	0.204731	0	15.6013	2.10903	0
Ciclev10009896m	26.7739	14.5133	5.23687	34.8856	76.6416	1.646
Ciclev10009899m	473.887	824.262	369.884	479.508	846.06	271.305
Ciclev10009900m	146.455	258.625	178.846	162.478	86.983	153.034
Ciclev10009909m	321.269	296.529	1249.46	289.134	367.654	1005.6
Ciclev10009911m	104.963	150.599	192.135	203.862	331.962	611.537
Ciclev10009912m	25.7266	25.7453	75.1578	14.3842	30.9991	74.7714
Ciclev10009930m	127.386	115.997	73.6285	89.7728	96.3358	34.8107
Ciclev10009935m	8.08992	7.32126	102.861	47.4784	71.6798	585.727
Ciclev10009938m	15.385	3.00309	2.4879	25.4274	18.2135	1.65007
Ciclev10009953m	22.551	41.2956	49.7456	11.2549	47.3041	17.9334
Ciclev10009955m	36.2052	23.5069	16.8776	50.2324	24.4601	15.8304
Ciclev10009956m	69.3701	130.095	52.8882	351.891	297.518	241.654
Ciclev10009957m	50.8468	29.7754	21.6523	114.05	28.3271	58.9389
Ciclev10009964m	135.234	104.743	77.8454	224.213	175.878	66.5069
Ciclev10009973m	21.9709	15.6887	29.0108	18.1712	21.5535	43.2859
Ciclev10009975m	7.99874	11.1915	47.6724	60.818	72.4125	247.792
Ciclev10009984m	265.045	0.962312	0	89.0164	10.3638	9.60899
Ciclev10009987m	62.2236	45.9243	48.6323	141.59	122.245	118.076
Ciclev10009990m	242	370.358	229.242	87.2956	135.599	215.227
Ciclev10009993m	27.115	89.8901	73.6837	24.3253	29.9559	35.2263
Ciclev10009994m	96.7291	67.6937	44.908	56.6476	20.4738	20.1059
Ciclev10009996m	74.1067	132.239	158.204	71.9414	93.4172	167.465
Ciclev10009997m	242.385	133.682	75.8938	215.275	137.097	7.95775
Ciclev10010000m	74.9074	11.1941	22.3149	58.0536	24.8977	128.078
Ciclev10010020m	472.196	71.9203	293.535	160.332	454.25	2022.21
Ciclev10010023m	27.7872	45.7967	50.5624	34.7993	55.2601	100.709
Ciclev10010030m	38.2603	25.8244	15.9912	42.6196	39.9658	63.1308
Ciclev10010036m	4592.46	14117.2	40807.8	1519.13	6101.18	30537.3
Ciclev10010038m	24.908	70.3935	31.0477	16.0699	19.4984	72.7887
Ciclev10010044m	286.091	391.737	334.959	146.135	242.528	1276.48
Ciclev10010064m	15.7569	4.31574	25.9108	8.16813	22.8236	213.611
Ciclev10010065m	19.4358	17.3206	27.5795	74.3214	34.3657	65.9234
Ciclev10010068m	242.361	69.9659	412.312	94.0757	151.579	759.858
Ciclev10010097m	84.6779	77.6593	130.238	0	0.491403	0
Ciclev10010110m	31.8821	29.3446	13.4997	34.8403	11.5144	39.869
Ciclev10010113m	201.409	145.462	198.747	93.6076	78.5135	111.301
Ciclev10010132m	41.2222	21.1627	24.2839	53.9465	85.6004	42.7629
Ciclev10010134m	73.9229	99.0563	142.002	114.176	102.697	253.815
Ciclev10010149m	7.85449	5.92193	11.7988	7.67724	7.29476	14.3728
Ciclev10010155m	36.8644	18.234	6.95753	32.5875	15.018	1.73967
Ciclev10010159m	5.69527	12.6934	10.4651	6.40968	3.50889	16.2888
Ciclev10010166m	52.9681	17.5071	37.117	128.788	117.765	25.063
Ciclev10010195m	84.4267	74.7718	28.754	34.0059	22.1958	8.00972
Ciclev10010201m	2.3568	5.69573	63.1244	1.71471	2.84482	23.3674
Ciclev10010213m	3.20453	5.21334	9.55179	4.83	6.58045	7.24269
Ciclev10010225m	0.273557	3.83445	33.1246	0.447814	5.57216	13.0268
Ciclev10010262m	0	0	34.2615	0	0	0
Ciclev10010282m	3.91381	3.61146	2.26054	5.67886	2.14738	0.457925
Ciclev10010292m	14.2627	22.2134	80.9923	56.1003	40.0512	43.8516
Ciclev10010298m	0.15474	1.19668	2.94936	0.759927	2.66163	17.5255
Ciclev10010300m	0.450565	0.435556	22.7325	2.21273	44.4607	34.0201
Ciclev10010315m	0.753404	0.242769	0.563138	0.616662	1.36411	14.868
Ciclev10010340m	7.77745	16.4037	57.8689	36.459	12.1616	323.953
Ciclev10010367m	0.252515	0.85436	2.40648	1.65347	4.80063	14.733
Ciclev10010402m	8.16256	14.777	15.3084	6.64057	3.6276	8.61656
Ciclev10010407m	32.23	6.92365	8.0302	8.30492	1.08066	67.5985
Ciclev10010422m	23.7448	1.11067	0	31.6605	0	0
Ciclev10010426m	26.0958	14.1549	2.43819	10.7984	2.62495	0
Ciclev10010446m	10.9149	26.1007	32.2044	3.29143	14.5619	52.7409
Ciclev10010490m	14.3754	22.1081	24.6646	4.27864	0.985911	1.68195
Ciclev10010500m	10.6803	14.0789	10.5231	43.1794	52.4463	79.4203
Ciclev10010502m	238.931	313.108	75.4455	36.5188	57.6075	70.3927
Ciclev10010507m	34.006	7.46829	3.62763	26.8611	20.2647	32.8037
Ciclev10010508m	99.1718	111.944	784.432	342.507	110.583	2439.62
Ciclev10010518m	0.0502819	0	0	0.0411558	0	13.9782
Ciclev10010532m	3.95514	6.30052	12.4914	0	0	0
Ciclev10010559m	14.2219	17.0578	27.1661	1.72453	0	0.112987
Ciclev10010576m	17.8247	13.0789	17.577	23.73	22.3581	84.7613
Ciclev10010595m	18.1483	4.62597	0.101232	9.23782	2.20697	0.309882
Ciclev10010616m	26.298	10.3662	32.3476	7.20981	4.04497	12.3774
Ciclev10010626m	9.38266	7.81037	24.546	41.314	80.0649	82.4429
Ciclev10010628m	2.51659	2.83821	0.80616	7.01323	4.12257	0.257056
Ciclev10010678m	32.4601	9.2927	6.05333	17.3531	2.6823	7.7961
Ciclev10010708m	81.0772	51.8816	47.204	144.921	54.4361	119.37
Ciclev10010726m	1.79803	3.12864	10.6441	0.412073	4.23217	10.1821
Ciclev10010727m	24.0077	62.33	152.274	24.7033	27.944	750.394
Ciclev10010730m	2.90024	3.45062	2.25118	7.18242	1.95236	10.3367
Ciclev10010743m	13.9158	9.6822	7.8508	11.5352	16.7304	6.42631
Ciclev10010753m	102.787	130.255	74.6127	88.3109	67.8512	63.7421
Ciclev10010761m	4.6981	3.46241	2.24258	10.4701	4.46374	1.3969
Ciclev10010772m	0	0.453334	0	204.587	121.42	136.404
Ciclev10010799m	7.54673	1.12236	0	3.80124	0	0.0830157
Ciclev10010806m	0	0	9.56736	0	0	10.8779
Ciclev10010808m	68.7911	48.2227	29.8401	23.8078	37.3922	33.9419
Ciclev10010819m	2.62615	6.18801	19.8747	3.76164	7.28095	56.6137
Ciclev10010820m	12.7829	19.1241	56.3044	0.747346	2.75533	33.9485
Ciclev10010825m	72.6511	36.6604	0.484277	87.5359	10.636	2.07539
Ciclev10010830m	60.5457	48.1908	61.7956	24.3743	37.9811	53.502
Ciclev10010835m	0.436307	43.8644	15.4907	0.714235	4.73986	0
Ciclev10010861m	358.258	314.375	135.672	374.513	374.038	95.78
Ciclev10010881m	3.66846	38.0484	26.3062	17.1401	20.6182	1.18035
Ciclev10010890m	18.4908	22.2905	14.7156	16.751	27.8995	10.731
Ciclev10010901m	75.4971	77.0642	125.762	109.764	75.0694	52.9602
Ciclev10010902m	6.59329	16.5715	66.6293	2.39849	6.28724	55.1887
Ciclev10010916m	41.2277	36.7997	18.0484	46.2377	30.0369	9.87303
Ciclev10010931m	36.5607	33.0848	36.3357	37.9704	32.0411	9.49162
Ciclev10010934m	13.0412	23.6983	15.6409	7.87738	7.26534	5.13751
Ciclev10010946m	25.9335	18.9001	12.9859	19.7341	16.7522	8.25735
Ciclev10010954m	10.5995	4.97029	4.92212	14.5674	14.7159	15.2368
Ciclev10010955m	7.19741	3.29179	3.90466	1.71032	1.6815	4.61502
Ciclev10010963m	13.0776	5.58867	15.8247	10.8672	7.8326	28.9415
Ciclev10010968m	4.37556	2.81987	11.014	20.2946	12.2331	10.7108
Ciclev10010975m	21.8519	26.2654	23.8529	18.9319	17.543	7.64122
Ciclev10010985m	13.1459	5.50681	2.72449	15.7487	10.9273	4.68267
Ciclev10010991m	10.0794	16.0437	30.0449	14.6114	13.0093	36.1213
Ciclev10011001m	11.7455	5.48911	0.0872109	4.93417	1.5492	1.03448
Ciclev10011022m	18.3636	15.4977	11.0571	10.4181	6.86094	3.0012
Ciclev10011035m	2.12814	1.51844	0.284052	9.78773	3.80733	0.217378
Ciclev10011043m	22.2241	15.3959	2.5676	23.3452	24.5015	8.4849
Ciclev10011065m	32.0713	27.898	14.9421	22.0127	19.4429	6.16989
Ciclev10011083m	14.9207	11.7273	8.43893	18.3371	22.8068	9.68716
Ciclev10011085m	27.6337	10.8091	3.25841	11.5712	4.68228	1.43698
Ciclev10011098m	12.0484	8.54943	4.16751	7.83335	4.9122	1.83293
Ciclev10011105m	7.7867	8.50544	5.03104	9.36209	8.28392	3.05746
Ciclev10011109m	26.2032	16.6186	8.62141	40.1687	22.2585	16.3053
Ciclev10011111m	15.9356	4.67926	0.975661	3.60583	1.37864	0.979978
Ciclev10011114m	2.2146	3.78762	11.0142	10.2252	8.63638	9.35465
Ciclev10011117m	19.2641	15.0495	2.44869	8.93809	4.71483	0.480493
Ciclev10011127m	5.69225	1.90476	0.0613661	4.74871	2.6757	0
Ciclev10011134m	2.17393	0.663636	0.38485	8.00714	0.673283	0.392688
Ciclev10011141m	71.0893	74.9643	60.4487	72.8703	87.0509	36.6139
Ciclev10011147m	5.29098	7.79103	1.03468	1.25892	2.28356	11.7189
Ciclev10011164m	20.1566	5.81647	2.31294	12.4176	11.0498	1.32753
Ciclev10011167m	1.55427	3.40271	35.3651	3.36752	10.6773	26.2011
Ciclev10011169m	25.5212	29.539	49.2796	45.5799	31.3811	62.8822
Ciclev10011170m	1.27316	1.07691	0.713727	3.25652	5.85902	9.92259
Ciclev10011175m	13.1177	7.48109	7.44599	54.4929	7.40352	1.78953
Ciclev10011179m	7.45964	5.54704	23.1609	4.61132	0.661153	19.0672
Ciclev10011184m	80.4215	65.4294	122.434	23.8174	72.4195	115.279
Ciclev10011186m	49.2328	32.3446	9.5869	55.1639	35.2909	6.3341
Ciclev10011190m	14.1121	9.13269	1.85365	11.744	8.44582	1.16524
Ciclev10011191m	3.17792	2.4222	0.13704	7.00305	2.26838	0.104874
Ciclev10011214m	56.1497	50.3316	40.7486	148.404	78.2817	38.0163
Ciclev10011217m	0.175634	4.24459	17.5258	4.36063	7.73808	55.758
Ciclev10011218m	0.115472	0.167437	1.16519	5.95435	8.31063	3.96306
Ciclev10011220m	4.41979	3.79783	2.47771	5.82836	3.33436	10.7974
Ciclev10011223m	8.73575	8.01639	20.4405	13.0569	12.3785	50.9472
Ciclev10011233m	21.7	23.4689	34.8816	28.9483	25.0175	51.2279
Ciclev10011237m	5.62861	6.94953	11.1843	2.41755	1.31173	1.86483
Ciclev10011238m	47.8662	29.0582	1.86165	30.6961	5.39074	0.0982536
Ciclev10011239m	18.4075	5.93145	0.646784	17.7279	3.75066	0.944939
Ciclev10011244m	1.30582	1.73569	3.59917	0.578942	1.18216	7.18934
Ciclev10011250m	5.62747	10.1748	15.0141	10.5769	16.6988	16.4525
Ciclev10011260m	39.3923	41.2629	74.3572	20.5005	15.0631	25.0215
Ciclev10011265m	3.65612	3.48311	9.38656	6.72238	4.60506	14.0938
Ciclev10011279m	0.699217	0	0.855221	2.49735	0.230182	8.83549
Ciclev10011285m	14.2137	7.16881	5.88947	3.33843	2.85326	1.27258
Ciclev10011289m	62.2068	67.8428	57.5083	63.4603	48.5852	23.5333
Ciclev10011290m	0.073181	1.76858	4.75887	0	0.596256	8.97904
Ciclev10011295m	26.1631	28.118	36.4552	29.543	15.197	29.4554
Ciclev10011300m	8.95211	3.67288	0	4.81388	0.895247	0.178629
Ciclev10011302m	8.37779	3.53984	0	4.90451	1.65752	1.0473
Ciclev10011307m	7.23561	29.176	75.068	18.3349	65.8628	85.0873
Ciclev10011313m	5.14654	8.11726	13.97	23.9998	22.3762	9.47076
Ciclev10011317m	91.6559	46.6452	112.966	98.9819	117.012	349.755
Ciclev10011331m	51.3495	35.4714	42.6011	26.3019	25.6512	39.8671
Ciclev10011332m	0.19017	0.490226	67.0918	0.103769	0.0573868	236.975
Ciclev10011338m	94.2244	48.761	26.2411	29.3408	17.9614	17.2541
Ciclev10011366m	4.77581	6.26554	14.7888	10.9824	9.00736	16.0982
Ciclev10011367m	70.4961	78.0483	22.2079	102.807	77.2336	13.5159
Ciclev10011402m	31.3079	27.1449	66.7058	53.6727	51.8161	117.743
Ciclev10011407m	1.7467	28.1982	96.3522	0.953118	73.2663	105.309
Ciclev10011409m	93.9256	51.084	38.093	106.251	49.6238	43.9068
Ciclev10011415m	14.115	12.1016	3.67378	34.5218	9.5837	197.595
Ciclev10011433m	47.0694	34.1869	23.8469	23.5896	29.1105	30.8297
Ciclev10011437m	8.5588	15.5644	26.8878	12.0687	17.261	19.0497
Ciclev10011448m	47.8798	95.0122	142.014	63.0004	70.8544	99.6744
Ciclev10011455m	46.0516	80.8072	55.3611	17.9931	23.9325	14.6542
Ciclev10011456m	7.60722	2.91721	0.352442	19.2456	5.0655	0.485488
Ciclev10011458m	0.594921	7.62012	14.1741	1.88691	5.72243	21.6304
Ciclev10011465m	32.2253	38.0548	64.7339	26.7761	32.2124	51.8435
Ciclev10011473m	11.8314	4.82612	6.28753	42.6543	32.5662	20.5377
Ciclev10011475m	21.9609	15.0595	4.23194	29.0408	15.2836	8.06707
Ciclev10011476m	0.241318	1.32192	15.6024	1.38263	1.89336	0.828219
Ciclev10011481m	8.85776	11.8513	9.78727	0	0	0
Ciclev10011487m	10.7675	5.56331	2.77525	23.907	14.9018	10.0882
Ciclev10011493m	11.0273	8.13051	1.32718	12.9014	4.79412	0.0534556
Ciclev10011494m	24.7621	19.3862	120.786	43.4882	29.3913	449.74
Ciclev10011495m	22.5843	14.5959	17.6459	26.9162	22.1252	8.94778
Ciclev10011506m	4.88359	2.18941	0.396769	14.1351	6.21519	0.24291
Ciclev10011509m	17.6318	20.6328	31.4365	13.9434	23.6431	36.911
Ciclev10011511m	0.0633316	0.30611	0.355033	6.63514	3.78405	0.869434
Ciclev10011512m	22.7861	15.5833	18.3027	7.40451	9.35968	8.57904
Ciclev10011514m	4.50811	4.0553	2.52721	7.37978	2.21064	0.161168
Ciclev10011520m	12.3706	11.5576	5.81133	16.4607	7.38262	1.06734
Ciclev10011522m	18.9341	21.2086	42.6257	43.7252	41.356	66.7236
Ciclev10011533m	13.8709	12.6818	48.2481	6.2238	4.0849	4.15833
Ciclev10011536m	19.7783	38.5171	0.0806371	45.4458	10.8083	0
Ciclev10011537m	33.277	50.9712	42.6522	4.73135	5.6574	7.50669
Ciclev10011539m	98.4181	58.5529	51.0356	115.899	92.9342	46.7046
Ciclev10011544m	19.9571	39.0602	67.7573	95.3064	148.609	195.293
Ciclev10011554m	2.19443	1.39402	2.17918	12.7783	6.7545	4.08849
Ciclev10011556m	18.621	31.0464	63.0692	107.22	56.8575	41.6407
Ciclev10011564m	8.34934	12.0717	34.0258	7.9036	8.74174	16.1966
Ciclev10011567m	11.997	4.63894	6.62196	26.5883	9.13426	7.81259
Ciclev10011571m	21.7364	52.7204	33.6084	35.0044	26.4977	20.7374
Ciclev10011580m	16.5236	10.3506	4.44625	13.3623	7.12039	2.2117
Ciclev10011584m	13.922	3.97959	6.21011	25.7923	5.96299	3.72489
Ciclev10011587m	40.3531	20.7325	25.0514	42.3261	30.5107	8.6559
Ciclev10011588m	11.7948	7.73012	0.597704	16.6901	14.8404	0.171528
Ciclev10011592m	60.4525	28.1568	17.8689	31.3189	34.1426	5.71741
Ciclev10011595m	30.2854	5.70484	0.872519	24.2047	5.98837	0.278216
Ciclev10011596m	14.2472	9.05524	3.14445	56.746	23.5617	4.71649
Ciclev10011599m	34.089	12.0392	2.59575	17.9696	7.87781	8.63084
Ciclev10011601m	33.4572	13.1503	2.37025	21.5918	7.23935	6.78238
Ciclev10011613m	53.8917	8.17625	0	4.41104	0.203284	0.256889
Ciclev10011614m	1.46587	3.62132	13.5133	13.9312	10.174	38.5707
Ciclev10011627m	50.6726	19.5337	3.92117	18.5113	10.0613	1.00026
Ciclev10011628m	24.8683	9.39375	1.46439	25.3152	10.0742	1.65858
Ciclev10011637m	51.1078	28.6322	35.5155	20.0185	31.2423	17.5695
Ciclev10011638m	14.5747	5.34416	2.72349	7.8158	2.50239	0.143739
Ciclev10011643m	30.0777	24.7177	21.9537	58.3798	27.7776	19.1677
Ciclev10011647m	31.5687	33.0416	188.426	490.941	540.987	41.3217
Ciclev10011657m	88.3638	97.5702	197.501	72.0125	70.8698	131.545
Ciclev10011660m	15.5707	14.5216	16.381	22.4014	11.426	7.76878
Ciclev10011662m	11.86	1.51274	3.6937	7.75248	4.77195	6.92541
Ciclev10011672m	376.13	405.157	187.842	1714.55	762.782	338.277
Ciclev10011684m	471.466	748.316	956.394	421.672	431.336	1066.66
Ciclev10011685m	54.7978	38.4151	25.1382	39.1685	31.9615	22.5397
Ciclev10011691m	27.4765	27.5098	37.329	89.6712	60.7901	69.2824
Ciclev10011692m	38.1701	12.8827	0.368929	41.4768	11.4688	0
Ciclev10011696m	69.2825	38.0588	28.1919	42.9872	26.801	19.0674
Ciclev10011702m	26.2491	20.4852	13.1018	32.9768	25.0264	13.3187
Ciclev10011705m	32.1414	34.7296	35.8974	23.4637	20.9525	12.1385
Ciclev10011707m	7.54072	2.7582	0.114251	8.09044	1.10702	0.0874334
Ciclev10011712m	7.65409	4.90071	7.69006	1.62724	4.13955	15.7787
Ciclev10011714m	0.0776749	2.32771	752.266	0.127154	0	23.9927
Ciclev10011715m	9.21367	8.18457	2.32663	16.5095	9.01743	4.20201
Ciclev10011719m	460.269	442.407	291.901	515.981	375.146	214.996
Ciclev10011720m	56.1088	13.5921	2.46553	61.7425	31.37	9.77711
Ciclev10011721m	10.1028	3.11862	0	6.74038	9.99145	3.78785
Ciclev10011724m	4.18925	14.129	11.5858	2.36214	9.3549	12.301
Ciclev10011731m	33.2522	32.3758	64.2822	8.35436	3.03198	51.6567
Ciclev10011732m	6.18966	11.2437	10.1427	21.9908	11.2686	15.5823
Ciclev10011736m	188.128	112.035	71.2947	180.727	39.1958	63.3601
Ciclev10011738m	22.8524	23.6494	29.1302	23.1286	16.9112	38.9714
Ciclev10011745m	28.3311	40.7452	59.2013	23.8841	36.76	49.8094
Ciclev10011747m	7.42173	0	0	0	0	0
Ciclev10011765m	3.02187	1.53363	0.847021	25.4143	3.35123	4.86153
Ciclev10011766m	1753.23	868.752	81.4528	792.493	392.662	18.9742
Ciclev10011768m	39.2172	12.2173	0	54.0422	14.2845	0
Ciclev10011771m	120.983	315.111	384.743	165.102	209.419	311.352
Ciclev10011785m	109.128	93.2454	240.296	123.505	123.472	368.986
Ciclev10011788m	1.05247	0.832423	0.107274	6.96987	0.433089	0.164188
Ciclev10011795m	0.0860093	0.58201	2.12151	0.0703987	0.622914	15.6451
Ciclev10011796m	39.4166	14.0425	16.1915	2.15547	10.9205	38.0476
Ciclev10011799m	57.974	37.8189	40.484	89.4861	53.5539	104.911
Ciclev10011806m	6.76677	3.63409	3.47729	18.0774	2.89281	9.67667
Ciclev10011810m	1.30244	0	0	0.152293	0.336886	18.4391
Ciclev10011818m	101.906	74.0853	73.1645	43.4131	76.1125	56.6421
Ciclev10011841m	39.2341	65.7484	107.559	28.4891	54.7811	113.126
Ciclev10011842m	43.9982	31.8564	6.59067	39.0744	15.4005	2.44542
Ciclev10011857m	58.1733	25.9216	11.2742	28.1666	22.9943	7.92483
Ciclev10011867m	45.0558	22.6325	2.56663	84.3175	47.2889	17.3205
Ciclev10011869m	6.2325	7.89748	23.7963	10.892	10.0646	14.3807
Ciclev10011883m	5.20807	3.40174	8.52209	7.02787	3.122	15.7609
Ciclev10011887m	36.0176	33.7606	27.3031	17.0079	22.7059	4.50418
Ciclev10011903m	100.538	30.4159	40.5223	72.4547	69.1763	199.917
Ciclev10011910m	14.1408	51.8312	77.4374	87.2893	48.0655	16.1212
Ciclev10011911m	23.8785	46.1661	51.9032	34.2966	38.4305	79.833
Ciclev10011915m	348.191	302	148.288	571.066	687.125	53.8057
Ciclev10011932m	16.0705	22.2417	42.5345	19.9103	22.0217	44.305
Ciclev10011938m	17.6079	8.75153	2.23491	6.45824	2.55648	0.570108
Ciclev10011948m	79.7423	46.0533	11.0542	119.047	46.4848	1.82725
Ciclev10011949m	1266.82	832.253	524.651	1139.19	896.047	180.765
Ciclev10011957m	8.99172	2.31792	0.576079	20.1867	4.65154	0.514336
Ciclev10011959m	66.9166	44.7605	2.78734	24.7573	11.6283	7.82131
Ciclev10011964m	18.1157	9.29085	23.412	14.2052	15.1482	19.1625
Ciclev10011968m	123.478	37.7604	9.8945	52.2801	10.1503	0.682723
Ciclev10011970m	21.4628	21.0352	6.33257	19.5138	20.7758	9.53928
Ciclev10011996m	12.7431	14.2861	12.7991	11.3718	5.68803	0.683361
Ciclev10011997m	39.5371	50.2816	59.8041	30.0633	66.7852	59.4832
Ciclev10012000m	41.3925	28.2536	33.7986	58.0528	29.23	60.0677
Ciclev10012004m	8.2553	15.6854	12.9793	0.310665	0.0859025	3.25664
Ciclev10012015m	121.756	102.936	121.689	59.7844	70.7147	64.4834
Ciclev10012019m	8.07664	9.92023	16.5128	19.21	13.8494	42.8838
Ciclev10012020m	18.8293	27.8638	35.1185	0	0	0
Ciclev10012022m	2.16456	1.81952	0.211032	12.0167	5.02673	1.69573
Ciclev10012024m	2.60489	5.75569	1.46028	1.1422	5.39018	30.8914
Ciclev10012028m	1.23561	20.9028	24.7053	12.1361	40.0829	79.8662
Ciclev10012038m	30.3601	29.3003	23.5354	31.8618	29.4352	14.5722
Ciclev10012043m	48.815	105.979	66.6682	48.5222	72.3739	31.8195
Ciclev10012045m	42.7882	17.7765	5.02867	48.752	8.93285	10.7753
Ciclev10012048m	15.4836	36.7998	26.3164	38.3429	30.2666	18.4469
Ciclev10012049m	266.775	119.135	131.829	127.178	169.129	214.923
Ciclev10012055m	2.38103	0.548027	1.1441	10.394	1.33438	0.194568
Ciclev10012060m	27.0693	39.6875	38.0383	19.5714	33.818	42.8905
Ciclev10012062m	2.70505	22.3904	85.7732	4.15141	6.04567	37.4258
Ciclev10012067m	4.8861	10.4735	8.09825	20.4311	13.9433	16.6783
Ciclev10012076m	45.1802	81.5882	112.449	44.5457	59.671	81.5332
Ciclev10012086m	14.551	19.0543	43.2735	13.2615	22.9826	28.0691
Ciclev10012089m	13.6203	5.26665	1.18227	15.3918	10.5008	2.94047
Ciclev10012092m	2.9915	5.69864	13.6134	1.8004	3.02682	5.51098
Ciclev10012093m	33.5367	38.9191	34.0587	69.7517	88.2954	74.0922
Ciclev10012094m	2.0794	2.62191	11.5556	0.887994	4.74711	17.9191
Ciclev10012100m	944.059	972.845	776.173	47.8474	69.4275	90.9607
Ciclev10012107m	484.19	1019.21	738.411	344.686	586.132	416.433
Ciclev10012109m	5.91038	3.32421	23.7354	10.9067	4.08596	39.832
Ciclev10012115m	35.5682	31.1551	22.584	11.0636	22.8902	13.0987
Ciclev10012119m	8.06275	6.9368	4.97191	33.3928	9.34298	1.0377
Ciclev10012130m	37.6861	77.0088	51.3537	34.4527	23.7245	46.8613
Ciclev10012143m	20.4354	26.7917	76.209	16.2957	20.9615	77.4351
Ciclev10012147m	9.75516	13.7052	15.8956	5.32307	3.65029	19.0838
Ciclev10012150m	42.7574	84.9625	91.9942	58.5714	79.567	92.311
Ciclev10012164m	24.7966	31.1798	51.5271	47.8407	37.8922	99.021
Ciclev10012167m	0.24489	1.89386	1.51012	0.80177	7.2052	11.1363
Ciclev10012168m	37.9355	67.1659	67.534	31.4954	35.9432	28.3494
Ciclev10012170m	1.5988	0.818228	0.632666	14.4718	16.8579	7.02037
Ciclev10012173m	0.744684	1.85111	0.954205	2.61225	6.4527	12.4139
Ciclev10012177m	1.61444	2.74676	3.54777	9.98993	5.32004	6.4274
Ciclev10012180m	4.05774	80.8921	387.211	0.811865	28.3265	242.552
Ciclev10012182m	23.6633	26.8451	23.8998	9.20401	9.02927	7.0475
Ciclev10012197m	17.245	5.80943	0.683556	4.27729	0.867328	1.12095
Ciclev10012223m	74.2997	107.99	144.706	67.2384	95.7636	127.576
Ciclev10012224m	26.5699	12.7345	36.0481	15.4425	16.7769	61.2081
Ciclev10012232m	12.4127	15.2717	8.39616	5.7936	12.1659	25.5255
Ciclev10012239m	96.7221	280.84	398.678	51.9624	107.781	146.287
Ciclev10012248m	53.9211	70.3037	148.988	44.3701	68.7923	109.983
Ciclev10012250m	19.2173	18.4331	51.6106	36.7629	24.8823	98.1018
Ciclev10012263m	9.77109	5.20897	6.76645	33.2255	22.96	5.79466
Ciclev10012276m	2.55913	4.43236	1.55418	11.5206	3.2821	1.28087
Ciclev10012277m	248.278	372.133	431.905	166.83	252.636	393.603
Ciclev10012281m	9.72367	10.5221	8.13586	19.3625	9.32838	3.11309
Ciclev10012285m	84.1007	74.529	37.198	76.0262	51.474	33.3045
Ciclev10012286m	54.3377	104.458	104.735	60.5761	96.0678	70.3124
Ciclev10012288m	55.3982	36.103	29.032	56.2463	29.2459	18.0517
Ciclev10012290m	153.151	278.376	383.575	126.355	105.452	318.081
Ciclev10012292m	350.272	638.259	891.323	297.659	233.293	739.358
Ciclev10012298m	3.78425	0.24388	1.69714	28.1865	19.0707	0
Ciclev10012300m	0	0.133883	0.3882	24.5423	3.13451	0.059416
Ciclev10012320m	104.309	103.067	73.0183	97.979	97.3581	38.904
Ciclev10012321m	8.46373	14.3478	20.4916	7.83117	15.1023	33.1527
Ciclev10012328m	12.6489	8.25359	1.06363	29.7653	19.8485	5.42648
Ciclev10012329m	5.20793	3.31213	0.153659	15.256	3.9703	1.05833
Ciclev10012331m	134.586	94.1821	194.567	192.268	242.328	149.752
Ciclev10012342m	0.203653	0.88591	6.73582	0.583415	1.19838	29.8801
Ciclev10012370m	24.9983	41.9996	11.0153	26.6263	7.70837	0.561983
Ciclev10012372m	29.2067	18.9609	19.5835	6.56236	14.3869	6.26497
Ciclev10012379m	3.50124	2.56132	0.318287	10.2238	2.74133	1.38027
Ciclev10012382m	10.9899	16.5064	18.839	0.148681	0	0
Ciclev10012384m	16.2204	14.1527	1.53518	40.2602	10.7748	24.039
Ciclev10012398m	98.155	89.0854	169.38	107.153	89.7287	210.341
Ciclev10012400m	8.6663	8.18721	7.17699	25.2299	15.8695	13.6887
Ciclev10012401m	12.4493	4.27396	0.652242	3.3331	1.15863	0
Ciclev10012408m	57.7506	34.3259	25.2288	37.2615	23.3147	11.8297
Ciclev10012434m	7.47832	11.8296	17.8363	13.3549	16.4945	37.2158
Ciclev10012444m	20.0564	1.74147	0	35.6831	27.0725	1.3396
Ciclev10012445m	67.4195	38.4525	30.8659	54.7231	42.521	32.4908
Ciclev10012455m	135.965	98.5766	33.5639	123.295	60.3567	14.6337
Ciclev10012456m	21.7241	41.1692	25.6832	31.1612	21.2246	2.03006
Ciclev10012464m	330.595	506.852	336.541	328.605	257.342	120.339
Ciclev10012467m	16.2989	5.29505	1.04852	11.1537	5.32163	2.52184
Ciclev10012472m	28.2435	47.0612	26.3885	31.2287	19.9616	11.7978
Ciclev10012482m	0	0	0	18.2425	3.12823	0
Ciclev10012496m	29.2964	15.0297	1.44065	32.6032	13.1447	1.98448
Ciclev10012509m	25.902	24.9269	16.7995	24.4332	32.4922	10.564
Ciclev10012518m	291.58	311.852	204.101	196.217	88.1007	124.653
Ciclev10012528m	195.774	295.425	268.407	112.212	246.224	164.302
Ciclev10012533m	0	0.245	0.284157	3.63026	0.803046	10.6555
Ciclev10012535m	103.568	104.461	70.1477	186.589	170.513	35.7415
Ciclev10012549m	28.5733	83.5348	109.793	71.8647	67.5565	83.07
Ciclev10012553m	888.418	984.449	835.906	464.981	365.611	431.399
Ciclev10012554m	25.4476	118.471	386.95	78.4452	250.893	412.248
Ciclev10012570m	51.0863	59.7263	56.7382	61.2947	50.3836	94.2666
Ciclev10012571m	10.296	15.3411	27.9479	15.6506	11.4234	18.0003
Ciclev10012575m	18.0973	31.5361	56.0657	12.4738	18.647	32.9966
Ciclev10012583m	44.547	51.891	26.3462	56.3334	55.1491	151.837
Ciclev10012593m	120.941	103.086	67.563	17.9904	18.6606	19.9418
Ciclev10012601m	23.7898	13.1712	28.0065	47.972	42.5844	35.8139
Ciclev10012611m	3.21786	4.666	14.1538	3.34293	0.896347	0.318575
Ciclev10012617m	55.3221	51.808	6.29955	70.8698	37.171	38.0727
Ciclev10012618m	34.5456	17.8438	71.3363	114.453	29.5937	138.294
Ciclev10012619m	34.8614	32.1798	23.9513	11.7998	11.8647	3.8233
Ciclev10012623m	4.97922	16.2658	21.9455	16.302	25.0254	50.5305
Ciclev10012636m	17.3028	10.9739	14.2675	40.9884	18.8136	27.0214
Ciclev10012640m	39.6335	44.9389	33.4109	28.2936	18.8843	14.0627
Ciclev10012644m	185.502	193.862	168.283	204.154	238.191	107.005
Ciclev10012645m	0.639782	2.47388	34.9691	0.523662	2.75117	87.1448
Ciclev10012646m	65.1793	68.2192	125.094	71.9347	62.9997	139.462
Ciclev10012648m	32.0021	47.4575	53.2418	19.8096	15.9914	50.5864
Ciclev10012651m	29.1431	28.4531	42.2276	23.6952	22.3512	62.0563
Ciclev10012652m	2.38225	4.174	19.5313	0.731204	0.539163	5.23779
Ciclev10012655m	0	0.169137	10.0046	0.14321	0.633585	13.9615
Ciclev10012656m	37.1151	43.1234	76.0236	40.505	56.0004	92.9844
Ciclev10012659m	0	0.19316	29.348	1.14485	0.904466	28.9743
Ciclev10012667m	31.1503	46.3353	70.0965	32.0502	36.8392	66.254
Ciclev10012670m	26.343	12.3469	7.92724	16.8947	12.5952	9.49118
Ciclev10012675m	8.01452	8.08439	15.6274	7.70074	13.1441	25.7125
Ciclev10012678m	9.35916	18.6349	87.5491	84.0366	103.571	340.509
Ciclev10012679m	146.862	191.039	248.101	151.043	241.136	438.029
Ciclev10012687m	0.158475	1.22556	2.30984	1.68625	4.59094	15.909
Ciclev10012690m	61.4286	68.8834	52.3434	224.581	99.4823	72.2668
Ciclev10012703m	28.6461	13.7402	10.4198	37.4971	20.8852	24.1098
Ciclev10012712m	12.9784	12.2023	26.511	41.8364	51.8257	49.424
Ciclev10012718m	32.2226	31.2871	41.4028	23.5735	28.1385	55.6621
Ciclev10012723m	122.184	141.936	297.791	155.978	173.165	237.071
Ciclev10012726m	129.419	35.5734	82.0995	89.1397	35.5653	71.5758
Ciclev10012729m	36.1851	34.2137	25.9116	16.8625	6.33646	4.98571
Ciclev10012731m	34.3626	30.7674	42.1585	29.7396	17.0842	16.071
Ciclev10012736m	5.19491	13.559	19.4537	31.3801	36.0246	27.9028
Ciclev10012748m	33.8011	30.8121	46.2082	61.3997	40.8002	79.8825
Ciclev10012753m	35.02	49.5	70.1142	15.7772	8.65855	17.1702
Ciclev10012756m	17.9347	13.5447	14.8118	9.76453	13.5544	25.899
Ciclev10012768m	161.212	287.333	182.593	375.154	421.081	296.846
Ciclev10012769m	24.3305	26.5226	17.0252	45.1962	14.5281	4.58976
Ciclev10012776m	6.30791	10.2356	25.7635	13.1842	8.97372	130.765
Ciclev10012779m	225.749	149.801	139.137	112.432	115.926	98.1616
Ciclev10012786m	331.889	41.6137	3.20638	266.6	71.8103	1.29146
Ciclev10012794m	11.6203	4.85759	0.352121	3.34178	3.12752	4.17679
Ciclev10012795m	16.7938	7.90439	5.99426	2.05929	2.61932	0.647613
Ciclev10012815m	2.44405	3.05752	32.7216	1.64743	10.0217	24.5476
Ciclev10012818m	23.9137	17.6946	37.073	29.8434	63.0763	85.6199
Ciclev10012826m	8.56015	6.63173	10.4824	3.82624	3.40758	1.25017
Ciclev10012837m	26.4154	25.2123	132.213	58.5684	29.0599	370.48
Ciclev10012852m	2.56747	2.48194	12.2341	4.51817	2.09189	68.0705
Ciclev10012855m	18.858	28.9651	23.7275	2.57255	7.967	1.97761
Ciclev10012857m	1.00953	4.32185	28.6202	0.236086	0.130561	13.6116
Ciclev10012862m	5.66084	2.55373	7.47519	75.2671	54.2085	61.7391
Ciclev10012865m	33.9007	18.8728	0	32.7027	1.3701	0
Ciclev10012871m	21.7197	27.7515	13.9758	49.3135	36.761	44.7261
Ciclev10012880m	80.5537	31.1253	4.09925	29.8293	6.8334	3.64303
Ciclev10012891m	6348.78	1650	501.039	3300.35	1673.85	169.697
Ciclev10012893m	40.0525	13.2784	0.287861	19.2285	8.94866	0
Ciclev10012903m	136.358	17.5754	1.6987	38.2881	4.62918	0.812482
Ciclev10012905m	35.566	520.953	305.224	5.27109	275.47	101.846
Ciclev10012908m	195.106	315.794	471.098	151.904	265.817	234.498
Ciclev10012909m	184.433	153.836	101.288	153.689	147.59	69.6428
Ciclev10012912m	66.742	319.375	263.518	303.987	245.522	198.807
Ciclev10012918m	1.41954	3.08757	0	3.34045	3.37341	26.7958
Ciclev10012921m	28.208	49.1788	62.2542	35.7261	83.9576	127.894
Ciclev10012926m	0.822631	0	8.8543	10.2345	1.19156	53.9255
Ciclev10012928m	115.563	95.7381	42.2187	131.303	92.8642	59.5538
Ciclev10012929m	384.66	403.391	360.32	279.232	206.152	219.868
Ciclev10012937m	27.9404	14.929	15.3784	8.23292	5.15086	3.39985
Ciclev10012941m	1.0289	4.57529	5.53724	6.4004	3.53957	36.5486
Ciclev10012950m	112.225	167.049	114.114	66.7786	62.198	69.1064
Ciclev10012953m	1976.68	171.986	2.75282	584.497	40.1806	0
Ciclev10012955m	574.094	256.728	150.217	400.728	223.146	217.309
Ciclev10012964m	76.5347	34.0546	92.0053	119.521	70.5375	20.2694
Ciclev10012967m	1037.3	678.157	523.198	1042.78	1305.45	1231.99
Ciclev10012969m	1.76349	0.309954	0	13.3844	0.580541	0.137555
Ciclev10012971m	1.15054	2.03906	10.3198	22.6012	11.9782	94.7695
Ciclev10012997m	112.372	116.946	180.035	111.492	125.661	215.515
Ciclev10013005m	54.6633	51.9197	39.4965	10.4398	11.7825	12.7305
Ciclev10013007m	82.4313	129.553	253.859	87.9288	97.1329	168.605
Ciclev10013010m	63.8676	35.28	35.4628	24.3953	22.21	29.7483
Ciclev10013012m	6.81992	1.87091	17.6694	59.2911	6.92497	95.2072
Ciclev10013013m	47.6191	23.1455	12.3745	63.4549	69.4588	39.3306
Ciclev10013017m	1.17673	14.5983	33.8628	0	0.177548	15.1448
Ciclev10013022m	1524.82	1829.7	1477.66	1001.74	1471.08	415.255
Ciclev10013023m	345.135	194.962	97.2475	210.141	171.657	76.1038
Ciclev10013026m	1.20941	0.389708	7.23187	9.4041	2.55472	33.3792
Ciclev10013033m	963.559	2139.86	1855.41	636.338	1363.61	887.785
Ciclev10013034m	108.352	105.84	92.385	54.9642	58.7371	78.9113
Ciclev10013046m	24.225	124.751	2691.76	432.181	1414.81	5597.05
Ciclev10013051m	459.821	408.525	386.042	282.123	331.958	150.861
Ciclev10013053m	6.6035	8.31792	17.2754	0	0	0
Ciclev10013054m	234.367	230.211	183.842	103.996	148.909	104.891
Ciclev10013071m	13.6144	24.6506	1.93832	60.8466	26.411	0.741676
Ciclev10013078m	30.3415	37.2333	42.479	63.5661	84.2546	41.5457
Ciclev10013081m	66.3281	63.0379	73.3217	27.6023	41.1557	44.1217
Ciclev10013091m	1.46673	1.77234	4.31676	20.709	15.2701	17.3041
Ciclev10013094m	371.129	536.945	583.992	292.257	397.794	592.492
Ciclev10013103m	39.4353	36.3756	6.75027	14.5373	9.53836	7.74873
Ciclev10013114m	283.024	10.3576	0	983.045	71.7419	0
Ciclev10013116m	141.443	190.215	139.073	45.1031	53.9255	74.0794
Ciclev10013119m	3057.79	308.036	32.9136	2343.03	656.223	5.92025
Ciclev10013128m	508.617	375.135	225.274	256.388	267.137	134.022
Ciclev10013137m	27.476	14.0546	6.21641	30.0528	20.6354	8.88023
Ciclev10013140m	46.1239	27.7165	25.1579	49.3843	18.6209	3.10183
Ciclev10013147m	7.96719	2.08862	0.757009	14.0371	4.15647	0.347593
Ciclev10013157m	1732.3	2889.96	1589.73	1037.11	1507.01	976.582
Ciclev10013159m	44.1194	33.6276	24.0196	7.29179	10.5614	8.18982
Ciclev10013171m	34.5239	21.1009	4.99455	8.56852	10.2837	4.01332
Ciclev10013175m	0.895279	5.19273	15.0566	1.83197	3.44461	42.6331
Ciclev10013177m	13.6734	34.5133	419.882	25.803	131.006	899.125
Ciclev10013180m	9.29703	18.9308	0.887124	21.2098	12.7144	1.52751
Ciclev10013182m	1.81677	0.351251	0.497919	6.67512	12.3537	4.29542
Ciclev10013183m	203.568	156.677	102.489	266.381	140.272	105.874
Ciclev10013188m	2338.11	5870.09	376.551	337.045	721.276	151.562
Ciclev10013197m	166.067	239.626	225.116	94.1164	89.1831	156.244
Ciclev10013204m	125.764	103.845	95.0353	137.888	111.738	46.7843
Ciclev10013206m	32.0675	9.44897	15.3812	43.7922	13.8167	71.0667
Ciclev10013209m	176.703	44.6081	5.25787	75.3863	15.1138	1.44854
Ciclev10013212m	10.4017	0.9858	0.457341	7.34521	1.29248	55.6487
Ciclev10013222m	2.21726	1.36398	17.4017	0.989905	0	0.345899
Ciclev10013233m	25.8621	3.88523	24.8819	1.57331	2.84752	13.9438
Ciclev10013234m	9.35101	15.7666	26.5763	21.0035	16.5372	53.9242
Ciclev10013246m	27.0268	85.7936	55.2807	107.169	236.903	131.929
Ciclev10013247m	28.6188	35.7034	60.9219	31.4965	56.5437	80.4687
Ciclev10013274m	15.162	26.3824	89.7569	20.0216	24.524	36.7728
Ciclev10013275m	148.289	175.022	235.057	128.35	145.733	238.22
Ciclev10013290m	98.7075	46.4306	37.9777	82.9582	115.473	99.565
Ciclev10013296m	48.7273	32.265	63.3167	31.9297	44.6228	535.782
Ciclev10013297m	638.565	639.952	1091.16	707.003	809.571	1471.87
Ciclev10013302m	0	0	0	15.602	9.71724	11.7503
Ciclev10013304m	180.802	164.783	429.666	502.435	288.07	772.697
Ciclev10013309m	0.0804863	0.0778051	0.0902401	6.25842	7.14069	7.04397
Ciclev10013392m	0.543878	0.39432	0.304894	15.9146	12.4324	5.13322
Ciclev10013395m	17.018	12.1404	6.42813	0.0744879	0.329548	0.234252
Ciclev10013409m	32.4535	26.7403	80.3432	33.3378	41.2111	51.5799
Ciclev10013411m	746.162	1160.54	558.534	375.454	534.198	425.201
Ciclev10013413m	9.05049	1.36348	0.263566	23.859	6.17165	1.8153
Ciclev10013433m	0	0.267631	11.485	0.679814	1.00254	27.3177
Ciclev10013443m	15.4403	17.9112	18.9408	1.93286	0.822242	0.311719
Ciclev10013454m	637.394	76.8126	28.8937	473.193	53.6594	187.212
Ciclev10013489m	9.54092	4.87135	2.41062	13.0337	6.20432	2.76719
Ciclev10013503m	51.1984	129.773	662.168	85.7918	129.561	1765.47
Ciclev10013510m	30.1435	26.1249	39.7899	28.5009	58.2745	31.4695
Ciclev10013514m	14.558	16.8325	16.1622	0	0	0
Ciclev10013516m	0.369138	0.356841	10.4503	1.96391	1.16963	2.85054
Ciclev10013518m	0.415638	0.0573989	0.133145	5.6862	7.7943	3.4134
Ciclev10013531m	15.139	28.8774	18.9438	14.1615	4.40528	7.53856
Ciclev10013556m	32.8412	31.2633	18.9718	37.4525	24.0206	16.4946
Ciclev10013565m	22.4317	198.968	440.189	27.3167	150.176	191.06
Ciclev10013572m	31.5959	63.5163	56.3578	11.1674	5.52572	37.276
Ciclev10013625m	10.9984	34.9338	37.8746	0	0	0
Ciclev10013630m	0.310525	27.5166	44.9121	4.15136	22.1146	21.0484
Ciclev10013662m	21.5604	35.3768	37.4261	21.1302	14.7246	20.203
Ciclev10013663m	2.08898	1.68283	32.79	1.42486	5.67347	13.1441
Ciclev10013664m	1.01309	6.32124	9.29346	0.979986	1.66755	4.18822
Ciclev10013676m	243.174	254.483	116.561	200.864	140.166	107.961
Ciclev10013692m	18.636	39.4542	32.1453	8.28251	7.0233	25.1789
Ciclev10013700m	108.098	76.9646	155.307	143.578	259.595	159.396
Ciclev10013705m	15.6615	196.197	269.294	53.4825	200.357	541.59
Ciclev10013731m	559.662	6544.06	3555.94	111.177	2887.88	1142.66
Ciclev10013733m	0.701644	2.37395	16.1268	0	1.1116	6.62224
Ciclev10013735m	0.589201	1.89858	3.08282	5.78714	12.8906	17.1042
Ciclev10013742m	33.5564	57.1201	180.754	1.49271	6.93424	59.4616
Ciclev10013764m	39.4968	38.4167	23.5084	49.0909	27.8105	17.1536
Ciclev10013799m	10.1377	8.82001	8.63837	25.1698	23.556	15.425
Ciclev10013834m	613.818	415.664	241.401	381.832	406.365	143.685
Ciclev10013864m	9.65989	2.64108	0.546997	8.38582	5.65339	0.669766
Ciclev10013866m	1317.03	889.025	578.043	883.57	837.511	332.017
Ciclev10013868m	2829.02	3790.29	2022.01	3128.98	3970.95	1698.24
Ciclev10013885m	3.69303	9.99601	25.3035	2.21668	10.6985	29.9968
Ciclev10013891m	36.2439	7.16886	0.117107	7.52328	0.945578	0.179238
Ciclev10013904m	8.05378	3.80006	0.644984	0	0	0.0822652
Ciclev10013918m	74.6999	32.4156	38.2677	42.2725	39.5726	36.7351
Ciclev10013926m	18.8009	1.44243	0	28.0902	2.43149	0.768164
Ciclev10013930m	10.4149	7.19138	13.1598	37.0751	17.0612	36.17
Ciclev10013984m	0.449586	0.579479	2.77238	7.66638	9.02205	12.7298
Ciclev10014006m	4.83178	26.3429	16.297	5.15988	24.6337	14.6881
Ciclev10014012m	2.73152	2.08963	1.16773	4.51976	2.95318	1.26458
Ciclev10014027m	33.2986	30.446	13.8903	21.928	31.6596	30.0957
Ciclev10014058m	0.654668	14.6823	5.68853	5.86751	14.7279	25.8108
Ciclev10014060m	0.427768	0.6998	0.590286	5.35966	2.65123	1.07286
Ciclev10014078m	9.1936	10.2938	8.15595	13.5804	18.6916	5.49788
Ciclev10014084m	15.2679	8.92813	6.43954	24.214	10.5821	1.783
Ciclev10014091m	0.317274	0.340783	2.52958	2.19293	1.88294	10.889
Ciclev10014096m	12.1133	20.1833	35.0111	15.4701	27.0298	43.3496
Ciclev10014111m	8.48054	4.38885	0.528237	4.97812	3.06321	0.293998
Ciclev10014113m	0.0781814	0.26452	0.832732	3.58353	6.83004	3.42113
Ciclev10014119m	14.5969	14.1492	12.4756	13.0575	10.1456	5.4067
Ciclev10014120m	17.6722	12.931	3.25301	18.9675	6.68598	1.09924
Ciclev10014122m	1.48809	0.936708	2.40563	9.77233	9.30483	12.0554
Ciclev10014125m	41.0073	37.9475	26.2858	19.0188	14.3133	12.3129
Ciclev10014127m	26.0885	14.5239	6.27114	53.6343	20.7719	5.4297
Ciclev10014129m	1.38566	1.23646	0.298766	8.89881	1.06145	0.0914552
Ciclev10014134m	12.6761	14.4254	18.9797	11.4918	11.512	8.32934
Ciclev10014138m	20.0782	24.6532	13.0929	25.9923	14.4937	1.87466
Ciclev10014149m	2.18985	1.56651	0.63836	4.48099	1.38773	0.0375786
Ciclev10014170m	7.33544	2.94119	0.186918	3.82077	0.716901	0
Ciclev10014175m	2.6402	4.42891	9.01107	2.86016	3.02287	0.799531
Ciclev10014177m	5.64919	4.7487	5.14047	11.5932	3.74301	4.14462
Ciclev10014186m	65.1446	50.0418	31.7665	73.9657	40.5383	23.1404
Ciclev10014192m	6.41578	2.78023	0	0	0	0
Ciclev10014197m	4.70508	5.51314	15.2929	24.7794	13.7251	29.7273
Ciclev10014199m	1.94924	2.8954	10.2343	1.94568	2.10897	0.0407922
Ciclev10014200m	29.5304	15.5811	21.2782	28.7264	30.408	11.4417
Ciclev10014203m	9.46789	8.90513	5.6806	0	0	0
Ciclev10014204m	87.2304	36.8153	9.50566	86.1676	73.0182	16.8829
Ciclev10014208m	0	0	0	3.89012	2.13159	0.523771
Ciclev10014213m	55.085	54.3367	57.1239	23.0365	28.4599	24.0108
Ciclev10014219m	22.4589	14.6749	23.1289	59.4713	53.1269	28.5484
Ciclev10014220m	35.7325	31.6681	65.8886	37.8438	44.4479	83.0847
Ciclev10014235m	42.53	48.3032	37.8898	54.014	78.9027	30.7093
Ciclev10014240m	0.317223	0.19166	0.0444582	3.44033	1.11283	0.0340228
Ciclev10014248m	4.88805	6.0959	9.87312	18.0498	9.32322	8.64419
Ciclev10014250m	8.45873	4.56581	5.10296	23.8983	25.3831	15.326
Ciclev10014255m	0.687778	7.56925	21.1763	3.50759	6.65751	13.2551
Ciclev10014259m	6.52444	5.37814	2.89202	29.7647	14.4688	1.64905
Ciclev10014264m	5.18482	3.55024	5.81315	15.6666	11.1087	11.7519
Ciclev10014266m	17.568	5.31333	2.93727	26.1941	8.78923	2.02745
Ciclev10014268m	1.03703	1.50373	2.49981	6.57827	6.19622	7.02933
Ciclev10014281m	41.1547	46.8647	50.4105	89.5378	64.3059	45.0696
Ciclev10014287m	21.4469	30.4076	41.7942	21.2742	30.0484	44.0767
Ciclev10014319m	16.9269	17.7809	27.734	14.3738	20.3481	29.5573
Ciclev10014320m	0.680466	0.657799	2.11273	21.4216	19.2863	21.5576
Ciclev10014322m	5.2612	3.65998	0.0551288	6.27834	4.58491	0.168755
Ciclev10014326m	13.9898	16.2522	17.1298	14.5142	14.7202	6.26497
Ciclev10014328m	4.13518	5.06991	7.5764	15.8913	25.3833	5.88458
Ciclev10014329m	0.0479558	0.324508	3.70995	0.510275	0.347315	4.69075
Ciclev10014333m	13.0135	9.90858	28.8432	39.1106	31.0221	8.57914
Ciclev10014341m	8.2398	5.00148	4.78031	20.8602	11.3193	4.35702
Ciclev10014347m	10.998	9.86312	4.75406	32.1574	6.65767	0.227386
Ciclev10014351m	4.26634	0.939696	0.666038	4.46446	6.8935	13.5766
Ciclev10014352m	34.1767	12.8337	0.553154	15.1616	1.62416	0.11545
Ciclev10014369m	8.27132	9.57458	15.7121	8.02061	11.4467	21.8785
Ciclev10014373m	13.4522	4.99463	3.60098	17.4112	15.2544	8.66662
Ciclev10014374m	8.02238	9.0176	12.8643	23.4784	28.1639	21.6905
Ciclev10014380m	8.61391	14.56	35.9767	9.60682	19.8374	34.4908
Ciclev10014382m	16.0918	11.4268	32.3529	23.9032	31.5638	39.1199
Ciclev10014384m	5.37243	3.49995	1.30946	5.87905	2.22037	0.501048
Ciclev10014386m	1.63194	1.01779	4.24966	27.3613	18.8726	6.8205
Ciclev10014391m	7.72972	8.99717	1.70971	5.16472	2.61819	0.496289
Ciclev10014399m	12.9222	14.5824	15.7006	7.47902	6.46108	5.2422
Ciclev10014400m	1.11614	1.59005	0.658633	19.4253	22.8679	6.09884
Ciclev10014402m	6.21837	5.44767	6.53621	3.81731	1.36339	0.791984
Ciclev10014403m	0.217981	0.737519	0.977589	3.0331	2.12138	6.82664
Ciclev10014407m	106.086	160.132	244.546	90.7855	126.872	151.83
Ciclev10014418m	35.2827	43.5062	32.7031	18.2544	17.8309	7.13826
Ciclev10014430m	7.89255	10.5861	22.2332	31.1294	27.1515	58.7466
Ciclev10014433m	69.6979	18.5984	7.11438	55.3027	22.7941	3.78935
Ciclev10014439m	38.1453	77.3354	50.6463	37.3306	84.2382	28.3105
Ciclev10014440m	10.1908	12.016	13.6802	5.72288	11.0461	17.2525
Ciclev10014442m	14.8323	16.2934	25.7635	8.69132	9.91817	21.2588
Ciclev10014447m	10.8802	10.0169	11.6823	68.7461	39.9204	14.5217
Ciclev10014451m	7.4931	7.14001	24.4834	10.9082	21.368	47.3006
Ciclev10014452m	5.59368	8.13264	33.5152	10.5853	16.0426	32.79
Ciclev10014463m	61.5915	36.5088	28.3289	89.676	69.8797	20.3961
Ciclev10014492m	0.405062	0.0489461	1.58952	12.723	1.10011	3.99683
Ciclev10014494m	18.904	22.1728	18.4395	46.9345	31.0329	18.4367
Ciclev10014496m	6.84275	5.52145	4.69197	0.694314	0.102392	0.291134
Ciclev10014498m	15.4989	20.2103	41.6926	33.403	35.1787	58.168
Ciclev10014501m	27.6715	8.25319	0.135776	12.3901	2.96007	0.519532
Ciclev10014502m	17.3992	16.6531	10.3011	21.5734	16.1154	6.35583
Ciclev10014505m	19.3084	17.332	6.68406	16.6051	12.2843	6.2985
Ciclev10014513m	4.3797	2.54028	7.4639	12.7619	13.2693	16.0335
Ciclev10014515m	9.04259	3.23945	2.14696	4.35375	2.26326	2.09941
Ciclev10014527m	14.8437	14.3062	7.79653	17.0751	11.0168	5.23981
Ciclev10014529m	61.4074	20.6331	10.0679	61.1738	46.7123	0.889008
Ciclev10014531m	4.5535	4.0675	8.33653	9.76579	4.85281	35.2122
Ciclev10014533m	19.1479	9.71877	5.75295	6.00952	2.26595	4.68894
Ciclev10014545m	6.31875	3.85521	0.987183	5.723	8.95564	1.37762
Ciclev10014552m	33.5574	26.446	22.5028	29.1409	24.0721	13.2173
Ciclev10014571m	30.9719	35.9282	76.0377	46.7809	74.3464	109.421
Ciclev10014585m	20.7148	17.4508	18.7218	20.058	15.8114	8.5964
Ciclev10014586m	2.66821	0.444712	4.28103	12.1623	30.7772	4.85505
Ciclev10014589m	8.49278	7.08852	32.4676	7.18871	8.73864	37.2167
Ciclev10014591m	13.2456	6.99622	5.20544	11.3632	8.20021	3.9836
Ciclev10014610m	9.11858	8.61335	11.0415	18.2964	19.6234	13.3677
Ciclev10014611m	8.87324	5.83455	25.3006	9.99089	11.7028	15.2268
Ciclev10014617m	137.709	197.386	122.55	245.147	204.73	101.659
Ciclev10014620m	5.53648	3.83642	3.84531	12.873	14.7704	13.6626
Ciclev10014629m	4.61568	0.944877	0	8.53369	1.42563	0.139776
Ciclev10014639m	84.1977	379.983	502.91	104.158	448.414	280.01
Ciclev10014640m	35.6881	31.9214	56.2345	71.8427	76.6362	84.512
Ciclev10014643m	54.5065	56.6599	84.7962	40.1328	43.5268	78.4735
Ciclev10014649m	34.5205	36.3996	45.8474	28.4688	25.6252	18.8648
Ciclev10014662m	16.0569	24.6259	14.5712	13.6822	11.6802	3.27257
Ciclev10014664m	1.59575	0.246815	0.0715654	11.4417	0.635639	0.438138
Ciclev10014669m	15.4418	21.3875	34.117	18.2683	19.0896	46.3169
Ciclev10014673m	25.6399	19.2654	22.0177	26.4714	25.2165	43.649
Ciclev10014683m	9.07136	4.94671	4.56377	30.2708	16.5299	9.28018
Ciclev10014684m	6.06877	5.69573	10.8339	14.2267	16.5355	5.86431
Ciclev10014703m	200.079	70.4706	74.978	57.4465	53.2681	92.7749
Ciclev10014709m	22.1183	15.1761	28.1626	36.379	35.9415	39.3925
Ciclev10014721m	12.2361	19.4753	20.7171	11.3304	18.5182	34.731
Ciclev10014733m	30.0202	14.3225	0	62.2233	5.44717	0.166538
Ciclev10014736m	6.74608	2.62019	0.270129	33.4258	3.5989	0.723531
Ciclev10014737m	1.00454	2.18492	2.6749	0.205554	0.795732	9.96585
Ciclev10014738m	22.1139	5.70061	3.70255	1.83416	2.2956	1.66972
Ciclev10014743m	73.9372	99.2928	140.616	66.9964	99.9864	259.022
Ciclev10014744m	17.6975	44.4267	60.4679	20.2682	25.9638	43.2136
Ciclev10014752m	199.299	290.221	512.389	122.235	230.57	266.802
Ciclev10014753m	15.0544	17.1603	20.3248	18.175	15.3891	44.1866
Ciclev10014762m	4.46585	9.10512	12.7452	15.4187	7.64482	35.74
Ciclev10014769m	10.2658	13.9435	13.2581	30.047	23.234	21.9647
Ciclev10014770m	50.7161	54.791	121.355	43.6311	44.1138	39.7425
Ciclev10014781m	24.9161	21.4355	17.1757	20.8817	14.624	5.67704
Ciclev10014786m	150.428	75.7055	86.26	204.582	298.145	95.1108
Ciclev10014787m	61.6278	7.1007	0	118.982	11.1716	0.441173
Ciclev10014796m	24.7709	23.6168	8.39286	25.6779	18.4206	12.3202
Ciclev10014808m	22.1147	3.80455	2.45145	33.3894	11.0282	14.3651
Ciclev10014811m	0.893208	0.801778	1.50218	3.91656	4.7362	8.70397
Ciclev10014812m	13.5465	8.32274	3.17263	27.547	16.515	8.162
Ciclev10014825m	8.36202	2.26337	1.42506	22.2851	4.42096	3.44388
Ciclev10014826m	2.1509	2.07925	13.8263	13.9081	7.07487	29.5282
Ciclev10014829m	1138.03	1429	321.053	160.87	88.6584	16.7152
Ciclev10014842m	18.7031	12.5334	31.1142	30.4815	10.7884	56.6161
Ciclev10014853m	66.4433	27.7165	14.1164	69.3318	75.7249	73.2673
Ciclev10014855m	10.3688	14.2149	25.4347	11.1615	10.6953	13.0483
Ciclev10014858m	37.6502	98.9471	120.059	13.5369	25.598	2.22339
Ciclev10014860m	9.45723	5.15881	5.52887	10.063	6.78815	44.1079
Ciclev10014861m	86.0905	225.879	240.5	0.98415	0.0725676	0
Ciclev10014862m	89.3305	230.954	261.867	8.94923	54.4053	58.1507
Ciclev10014863m	7.99837	46.9275	49.1002	0.972279	0.573539	0.0679479
Ciclev10014873m	25.1931	17.8524	22.5598	57.2142	50.3058	49.1447
Ciclev10014879m	28.2052	37.8094	16.8148	0.697461	0.385712	0.146227
Ciclev10014882m	113.698	97.1302	64.4442	59.8771	47.4188	61.4714
Ciclev10014884m	0.933677	2.48208	0	6.36846	1.05657	0
Ciclev10014902m	8.34582	5.80882	8.00978	2.95102	1.87376	10.3116
Ciclev10014911m	55.2138	33.9443	29.9569	60.2567	25.8694	18.6311
Ciclev10014913m	2.53365	3.26567	2.52506	5.81816	0.955715	0.120773
Ciclev10014921m	6.42816	7.21399	3.39648	14.9377	3.81272	1.77509
Ciclev10014927m	23.1627	42.5735	33.3012	0	0	0.0675985
Ciclev10014929m	27.7519	21.6201	3.97538	10.8273	9.19764	1.22861
Ciclev10014935m	38.4779	66.2134	46.3579	43.297	33.5685	26.5759
Ciclev10014943m	10.294	15.4081	19.6577	25.7661	16.7143	26.9531
Ciclev10014959m	27.9974	26.8991	12.3639	36.759	41.7951	13.678
Ciclev10014962m	19.8952	5.46292	4.77371	6.6531	7.35863	3.32109
Ciclev10014969m	5.60413	8.62369	14.4259	4.63379	5.74642	21.7852
Ciclev10014972m	2.53443	13.5567	89.1305	9.74984	29.1391	52.2625
Ciclev10014973m	4.77169	2.30637	0.648479	9.58656	1.37448	0.0620332
Ciclev10014975m	16.0689	20.9133	32.0549	29.0379	43.5787	55.9853
Ciclev10014977m	10.0019	9.73583	13.8617	20.5232	21.6306	33.5523
Ciclev10014986m	83.2432	42.248	30.8761	95.9896	127.37	42.647
Ciclev10014991m	8.38236	4.4081	1.12778	8.23316	6.25296	0.115075
Ciclev10014992m	1.99188	0.0837187	0.0970988	15.8074	0.470413	0
Ciclev10014993m	13.6212	17.9045	36.5967	12.9845	14.8125	8.9792
Ciclev10014994m	8.29867	1.4297	0	7.5995	0.669456	0
Ciclev10014995m	7.86851	5.99088	9.29049	32.3729	23.4503	25.6311
Ciclev10014997m	23.1087	36.6458	41.702	48.03	51.1253	69.0068
Ciclev10015011m	20.7133	13.1403	24.5298	39.6297	34.7493	23.6039
Ciclev10015021m	36.6476	36.1632	25.7161	17.873	15.8606	9.07745
Ciclev10015030m	2.02069	6.08551	18.2988	6.9338	10.8352	29.3409
Ciclev10015031m	9.72602	15.6277	10.9047	30.1218	32.8996	37.1582
Ciclev10015035m	15.9347	6.21445	9.58465	52.6741	25.0747	10.2102
Ciclev10015036m	5.34882	5.44278	0.157817	20.3923	29.7546	17.2102
Ciclev10015040m	8.98601	11.2863	2.2062	4.18755	1.72201	0.506506
[truncated: 2,867 more rows]

## Sheet: PK-DEGs
#GeneID	Gene_length	CSPTPG1-RPKM	CSPTPG2-RPKM	CSPTPG3-RPKM	GO Component	GO Function	GO Process	Blast nr
clementine0.9_000001m.g	15997	3.61674	1.26207	3.90556	GO:0009526//plastid envelope	GO:0000166//nucleotide binding;GO:0017111//nucleoside-triphosphatase activity	GO:0006139//nucleobase, nucleoside, nucleotide and nucleic acid metabolic process	gi|334183697|ref|NP_176883.5|/0/AAA ATPase containing von Willebrand factor type A domain-containing protein [Arabidopsis thaliana]
clementine0.9_000002m.g	15690	13.5382	2.76723	9.8454	GO:0044464//cell part	GO:0016874//ligase activity;GO:0046914//transition metal ion binding	GO:0009639//response to red or far red light;GO:0009725//response to hormone stimulus;GO:0048281//inflorescence morphogenesis;GO:0048513//organ development;GO:0060918//auxin transport	gi|357502541|ref|XP_003621559.1|/0/E3 ubiquitin-protein ligase UBR4 [Medicago truncatula]
clementine0.9_000004m.g	12138	9.63425	2.53969	4.74745	-	GO:0016772//transferase activity, transferring phosphorus-containing groups	GO:0006796//phosphate metabolic process	gi|359476827|ref|XP_003631895.1|/0/PREDICTED: transformation/transcription domain-associated protein [Vitis vinifera]
clementine0.9_000009m.g	11457	29.1932	13.9838	27.1777	GO:0044464//cell part	GO:0016879//ligase activity, forming carbon-nitrogen bonds	GO:0043412//macromolecule modification	gi|255572860|ref|XP_002527362.1|/0/E3 ubiquitin protein ligase upl2, putative [Ricinus communis]
clementine0.9_000010m.g	12127	4.5349	1.43211	3.90145	GO:0044464//cell part	GO:0004673//protein histidine kinase activity;GO:0032559	GO:0006796//phosphate metabolic process;GO:0007165//signal transduction	gi|297741391|emb|CBI32522.3|/0/unnamed protein product [Vitis vinifera]
clementine0.9_000011m.g	11258	18.7771	6.99978	9.01583	GO:0044424//intracellular part	GO:0003676//nucleic acid binding;GO:0016818//hydrolase activity, acting on acid anhydrides, in phosphorus-containing anhydrides;GO:0032559	GO:0007275//multicellular organismal development;GO:0010468//regulation of gene expression;GO:0048856//anatomical structure development	gi|224100259|ref|XP_002311805.1|/0/chromatin remodeling complex subunit [Populus trichocarpa]
clementine0.9_000013m.g	10907	10.1968	5.09534	9.34304	GO:0043231//intracellular membrane-bounded organelle	-	-	gi|297800398|ref|XP_002868083.1|/0/hypothetical protein ARALYDRAFT_355042 [Arabidopsis lyrata subsp. lyrata]//gi|334186631|ref|NP_001190747.1|/0/pleckstrin homology (PH) domain-containing protein [Arabidopsis thaliana]
clementine0.9_000016m.g	10297	267.718	592.827	278.929	-	-	-	gi|255560900|ref|XP_002521463.1|/5.65991e-112/Microtubule-associated protein futsch, putative [Ricinus communis]//gi|255560900|ref|XP_002521463.1|/9.35607e-123/Microtubule-associated protein futsch, putative [Ricinus communis]
clementine0.9_000018m.g	9818	7.7462	2.45436	8.11402	GO:0043231//intracellular membrane-bounded organelle	-	GO:0023052//signaling	gi|302142080|emb|CBI19283.3|/0/unnamed protein product [Vitis vinifera]
clementine0.9_000021m.g	8854	10.2983	3.87397	7.96983	-	-	-	gi|357436753|ref|XP_003588652.1|/0/Myosin-like protein [Medicago truncatula]
clementine0.9_000022m.g	8815	5.72854	1.05897	3.02771	GO:0009536//plastid	GO:0016772//transferase activity, transferring phosphorus-containing groups;GO:0032559	GO:0000003//reproduction;GO:0000723//telomere maintenance;GO:0006310//DNA recombination;GO:0006796//phosphate metabolic process;GO:0010212//response to ionizing radiation;GO:0022403	gi|297733786|emb|CBI15033.3|/0/unnamed protein product [Vitis vinifera]
clementine0.9_000027m.g	7782	1.83898	0.557927	1.89668	-	-	-	gi|356569800|ref|XP_003553084.1|/0/PREDICTED: uncharacterized protein LOC100800766 [Glycine max]
clementine0.9_000030m.g	8596	4.04317	0.883915	2.91668	-	-	-	gi|255564651|ref|XP_002523320.1|/0/nucleotide binding protein, putative [Ricinus communis]
clementine0.9_000031m.g	7641	0.535117	0.0852334	0.0529228	-	GO:0005488//binding;GO:0016787//hydrolase activity	-	gi|297738290|emb|CBI27491.3|/0/unnamed protein product [Vitis vinifera]
clementine0.9_000034m.g	7957	27.4661	12.9321	17.0505	-	GO:0032559;GO:0035004//phosphatidylinositol 3-kinase activity	GO:0006796//phosphate metabolic process	gi|224060923|ref|XP_002300288.1|/0/predicted protein [Populus trichocarpa]
clementine0.9_000037m.g	7671	20.3082	5.46191	13.7852	GO:0044464//cell part	-	-	gi|255541160|ref|XP_002511644.1|/0/ccr4-not transcription complex, putative [Ricinus communis]
clementine0.9_000038m.g	8233	4.8919	1.34478	2.77513	-	GO:0004672//protein kinase activity;GO:0032559	GO:0000003//reproduction;GO:0000723//telomere maintenance;GO:0006278//RNA-dependent DNA replication;GO:0006796//phosphate metabolic process;GO:0010038//response to metal ion;GO:0010212//response to ionizing radiation;GO:0022403	gi|255560447|ref|XP_002521238.1|/0/Serine/threonine-protein kinase ATR, putative [Ricinus communis]
clementine0.9_000041m.g	7812	36.2195	10.8656	15.9434	-	-	-	gi|147852611|emb|CAN81687.1|/0/hypothetical protein VITISV_030961 [Vitis vinifera]
clementine0.9_000042m.g	7516	3.59051	1.53083	2.04451	-	GO:0008187//poly-pyrimidine tract binding;GO:0016788//hydrolase activity, acting on ester bonds	-	gi|297735762|emb|CBI18449.3|/0/unnamed protein product [Vitis vinifera]
clementine0.9_000044m.g	7658	35.9868	13.6921	33.3202	GO:0005618//cell wall;GO:0009536//plastid;GO:0030529//ribonucleoprotein complex	GO:0035251//UDP-glucosyltransferase activity	GO:0000377;GO:0005985//sucrose metabolic process;GO:0006073//cellular glucan metabolic process;GO:0006950//response to stress;GO:0048316//seed development	gi|359482368|ref|XP_003632762.1|/0/PREDICTED: pre-mRNA-processing-splicing factor 8-like isoform 2 [Vitis vinifera]
clementine0.9_000046m.g	8907	46.4796	9.57855	16.0037	GO:0043234//protein complex	GO:0016251//general RNA polymerase II transcription factor activity	GO:0006355//regulation of transcription, DNA-dependent;GO:0006656//phosphatidylcholine biosynthetic process;GO:0009956//radial pattern formation;GO:0050793//regulation of developmental process	gi|255541598|ref|XP_002511863.1|/0/CRP, putative [Ricinus communis]
clementine0.9_000048m.g	7380	30.1676	9.32485	17.4246	GO:0016020//membrane	GO:0016421//CoA carboxylase activity;GO:0016879//ligase activity, forming carbon-nitrogen bonds;GO:0032559	GO:0003006//developmental process involved in reproduction;GO:0006633//fatty acid biosynthetic process;GO:0009725//response to hormone stimulus;GO:0048507//meristem development	gi|255545642|ref|XP_002513881.1|/0/Homomeric Acetyl-CoA Carboxylase (Hom-ACCase) [Ricinus communis]
clementine0.9_000056m.g	7176	5.98282	2.05715	5.15622	-	-	-	gi|296086497|emb|CBI32086.3|/0/unnamed protein product [Vitis vinifera]
clementine0.9_000057m.g	7045	8.93797	2.77332	4.9651	-	-	GO:0003006//developmental process involved in reproduction	gi|296081931|emb|CBI20936.3|/0/unnamed protein product [Vitis vinifera]
clementine0.9_000060m.g	6882	6.68401	2.23966	4.58324	GO:0009536//plastid	GO:0005488//binding	-	gi|297745033|emb|CBI38625.3|/0/unnamed protein product [Vitis vinifera]
clementine0.9_000063m.g	6857	10.4054	3.07098	5.86789	GO:0016020//membrane	-	-	gi|186523158|ref|NP_197072.3|/0/armadillo/beta-catenin-like repeat-containing protein [Arabidopsis thaliana]
clementine0.9_000065m.g	7248	9.44921	4.34299	3.76599	GO:0043231//intracellular membrane-bounded organelle	GO:0004468//lysine N-acetyltransferase activity;GO:0005515//protein binding;GO:0046914//transition metal ion binding	GO:0006351//transcription, DNA-dependent;GO:0009648//photoperiodism;GO:0010346;GO:0016573//histone acetylation	gi|296086550|emb|CBI32139.3|/0/unnamed protein product [Vitis vinifera]
clementine0.9_000066m.g	6889	3.9173	1.92226	2.28929	-	GO:0016740//transferase activity	GO:0009987//cellular process	gi|255557755|ref|XP_002519907.1|/0/mixed-lineage leukemia protein, mll, putative [Ricinus communis]//gi|296082099|emb|CBI21104.3|/0/unnamed protein product [Vitis vinifera]
clementine0.9_000067m.g	7482	8.96242	1.68286	4.56701	-	GO:0003824//catalytic activity	-	gi|224083759|ref|XP_002307113.1|/0/predicted protein [Populus trichocarpa]//gi|255576178|ref|XP_002528983.1|/0/ubiquitin-protein ligase, putative [Ricinus communis]
clementine0.9_000068m.g	6300	13.9215	5.06542	8.50488	-	GO:0046872//metal ion binding	-	gi|302141758|emb|CBI18961.3|/0/unnamed protein product [Vitis vinifera]
clementine0.9_000070m.g	6634	16.6413	6.44658	10.7892	-	GO:0003824//catalytic activity	-	gi|255558634|ref|XP_002520342.1|/0/ubiquitin-protein ligase, putative [Ricinus communis]
clementine0.9_000071m.g	7016	3.81725	1.1758	2.27667	GO:0016020//membrane	GO:0004197//cysteine-type endopeptidase activity	GO:0003006//developmental process involved in reproduction;GO:0019538//protein metabolic process;GO:0045165//cell fate commitment	gi|255564850|ref|XP_002523419.1|/0/calpain, putative [Ricinus communis]
clementine0.9_000073m.g	6448	1.71213	1.0437	0.595788	-	-	GO:0009987//cellular process	gi|297736796|emb|CBI25997.3|/0/unnamed protein product [Vitis vinifera]
clementine0.9_000074m.g	6587	6.08327	2.96615	6.38467	-	GO:0003676//nucleic acid binding;GO:0017111//nucleoside-triphosphatase activity;GO:0032559	-	gi|224126033|ref|XP_002319739.1|/0/chromatin remodeling complex subunit [Populus trichocarpa]
clementine0.9_000075m.g	7158	8.76831	2.00166	5.64939	GO:0005576//extracellular region	-	-	gi|255560135|ref|XP_002521085.1|/0/DNA binding protein, putative [Ricinus communis]
clementine0.9_000078m.g	6548	12.4576	4.44258	12.9689	GO:0015630//microtubule cytoskeleton;GO:0044444//cytoplasmic part	GO:0015631//tubulin binding	GO:0000919//cell plate assembly;GO:0015031//protein transport	gi|224061471|ref|XP_002300496.1|/0/microtubule organization protein [Populus trichocarpa]
clementine0.9_000081m.g	6236	1.01631	0.104437	0.0972699	-	GO:0003676//nucleic acid binding;GO:0016779//nucleotidyltransferase activity;GO:0017111//nucleoside-triphosphatase activity;GO:0032559	GO:0006259//DNA metabolic process;GO:0009639//response to red or far red light;GO:0010467//gene expression	gi|255551068|ref|XP_002516582.1|/0/DNA polymerase theta, putative [Ricinus communis]
clementine0.9_000084m.g	6954	37.0135	9.27173	17.3581	GO:0016020//membrane;GO:0031981//nuclear lumen	-	GO:0010260//organ senescence	gi|297741295|emb|CBI32426.3|/0/unnamed protein product [Vitis vinifera]
clementine0.9_000086m.g	5944	3.23309	0.547837	1.66679	GO:0016020//membrane;GO:0043234//protein complex	GO:0035251//UDP-glucosyltransferase activity	GO:0006074//1,3-beta-D-glucan metabolic process	gi|334185349|ref|NP_188075.2|/0/callose synthase [Arabidopsis thaliana]
clementine0.9_000087m.g	6285	12.003	3.73042	7.68875	-	-	GO:0008152//metabolic process;GO:0009956//radial pattern formation;GO:0050793//regulation of developmental process	gi|297746481|emb|CBI16537.3|/0/unnamed protein product [Vitis vinifera]
clementine0.9_000088m.g	6609	12.5591	2.6278	3.18171	GO:0043076	GO:0016799//hydrolase activity, hydrolyzing N-glycosyl compounds;GO:0016835//carbon-oxygen lyase activity	GO:0003006//developmental process involved in reproduction;GO:0006305;GO:0040029//regulation of gene expression, epigenetic	gi|330370553|gb|AEC12446.1|/0/repressor of gene silencing 1 [Gossypium hirsutum]
clementine0.9_000094m.g	6531	122.145	42.4473	107.922	GO:0016020//membrane;GO:0043234//protein complex;GO:0044444//cytoplasmic part	GO:0035251//UDP-glucosyltransferase activity	GO:0006074//1,3-beta-D-glucan metabolic process	gi|334184624|ref|NP_850178.2|/0/callose synthase [Arabidopsis thaliana]
clementine0.9_000096m.g	6490	12.5059	6.12132	12.0256	-	GO:0046872//metal ion binding	-	gi|296089008|emb|CBI38711.3|/0/unnamed protein product [Vitis vinifera]
clementine0.9_000097m.g	6178	10.6225	1.93265	6.67645	GO:0016020//membrane;GO:0043234//protein complex;GO:0044444//cytoplasmic part	GO:0035251//UDP-glucosyltransferase activity	GO:0006074//1,3-beta-D-glucan metabolic process	gi|255574422|ref|XP_002528124.1|/0/transferase, transferring glycosyl groups, putative [Ricinus communis]
clementine0.9_000099m.g	5853	3.14364	0.778896	4.0763	GO:0043234//protein complex;GO:0044464//cell part	GO:0035251//UDP-glucosyltransferase activity	GO:0006074//1,3-beta-D-glucan metabolic process	gi|255571406|ref|XP_002526651.1|/0/transferase, transferring glycosyl groups, putative [Ricinus communis]
clementine0.9_000106m.g	6347	19.6163	9.02972	24.0196	GO:0016020//membrane;GO:0043234//protein complex	GO:0035251//UDP-glucosyltransferase activity	GO:0006074//1,3-beta-D-glucan metabolic process;GO:0007067//mitosis;GO:0009555//pollen development;GO:0009860//pollen tube growth;GO:0052386//cell wall thickening	gi|255540397|ref|XP_002511263.1|/0/transferase, transferring glycosyl groups, putative [Ricinus communis]
clementine0.9_000108m.g	6581	10.2827	2.8699	7.65016	-	GO:0046914//transition metal ion binding	-	gi|357491343|ref|XP_003615959.1|/0/RING finger protein [Medicago truncatula]
clementine0.9_000112m.g	6273	23.4653	14.1542	33.5213	-	-	GO:0044260;GO:0050896//response to stimulus	gi|309296911|gb|ADO64263.1|/0/eukaryotic translation initiation factor 4G [Carica papaya]
clementine0.9_000114m.g	7132	27.8054	7.51838	21.064	-	GO:0005488//binding	-	gi|255564713|ref|XP_002523351.1|/0/eukaryotic translation initiation factor 3 subunit, putative [Ricinus communis]
clementine0.9_000120m.g	5915	11.0602	5.02811	7.28095	-	-	-	gi|297738947|emb|CBI28192.3|/0/unnamed protein product [Vitis vinifera]
clementine0.9_000128m.g	6004	7.18474	1.26551	1.4144	GO:0044451//nucleoplasm part;GO:0055029	GO:0003676//nucleic acid binding;GO:0034062//RNA polymerase activity	GO:0006305;GO:0016246//RNA interference	gi|296090333|emb|CBI40152.3|/0/unnamed protein product [Vitis vinifera]
clementine0.9_000130m.g	6071	36.8742	13.5882	22.5138	GO:0009536//plastid;GO:0016591//DNA-directed RNA polymerase II, holoenzyme	GO:0003676//nucleic acid binding;GO:0016757//transferase activity, transferring glycosyl groups;GO:0034062//RNA polymerase activity	GO:0006351//transcription, DNA-dependent	gi|255579596|ref|XP_002530639.1|/0/DNA-directed RNA polymerase II largest subunit, putative [Ricinus communis]
clementine0.9_000132m.g	5771	5.31385	2.25704	4.83494	-	-	GO:0003006//developmental process involved in reproduction;GO:0009058//biosynthetic process	gi|32250969|gb|AAP74222.1|/0/RST1 [Arabidopsis thaliana]
clementine0.9_000135m.g	6964	10.5978	0.841674	1.01618	-	GO:0005488//binding	GO:0009725//response to hormone stimulus	gi|255574960|ref|XP_002528386.1|/0/eukaryotic translation initiation factor 3 subunit, putative [Ricinus communis]
clementine0.9_000138m.g	6094	0.738056	1.99492	2.1898	-	-	-	gi|296089927|emb|CBI39746.3|/4.84307e-92/unnamed protein product [Vitis vinifera]//gi|296089927|emb|CBI39746.3|/4.86951e-92/unnamed protein product [Vitis vinifera]//gi|296089927|emb|CBI39746.3|/5.00169e-92/unnamed protein product [Vitis vinifera]
clementine0.9_000142m.g	5945	4.71127	0.839875	1.29239	-	GO:0008168//methyltransferase activity	GO:0016070//RNA metabolic process	gi|15236590|ref|NP_193496.1|/0/tRNA/rRNA methyltransferase (SpoU) family protein [Arabidopsis thaliana]
clementine0.9_000147m.g	6287	6.73125	2.62427	5.40292	-	-	-	gi|255547932|ref|XP_002515023.1|/0/ATP binding protein, putative [Ricinus communis]
clementine0.9_000148m.g	6378	24.1368	10.0069	16.1043	-	-	GO:0009725//response to hormone stimulus	gi|302142480|emb|CBI19683.3|/0/unnamed protein product [Vitis vinifera]
clementine0.9_000149m.g	5921	20.7169	4.39972	5.60031	GO:0044425//membrane part;GO:0044432//endoplasmic reticulum part	GO:0019899//enzyme binding;GO:0030695//GTPase regulator activity;GO:0032561//guanyl ribonucleotide binding	GO:0006810//transport	gi|255551315|ref|XP_002516704.1|/0/spike-1, putative [Ricinus communis]
clementine0.9_000151m.g	5883	2.05032	0.590419	1.06543	GO:0043231//intracellular membrane-bounded organelle	GO:0005543//phospholipid binding;GO:0016307//phosphatidylinositol phosphate kinase activity;GO:0046872//metal ion binding	GO:0006796//phosphate metabolic process;GO:0006996//organelle organization;GO:0023052//signaling;GO:0046488//phosphatidylinositol metabolic process;GO:0048229//gametophyte development	gi|255584440|ref|XP_002532951.1|/0/fyve finger-containing phosphoinositide kinase, fyv1, putative [Ricinus communis]
clementine0.9_000153m.g	5873	13.9242	5.98817	9.60522	-	-	-	gi|255564792|ref|XP_002523390.1|/0/nuclear pore complex protein nup153, putative [Ricinus communis]
clementine0.9_000156m.g	6201	13.7152	6.47663	9.16237	GO:0043234//protein complex	GO:0016251//general RNA polymerase II transcription factor activity	GO:0006355//regulation of transcription, DNA-dependent;GO:0008283//cell proliferation	gi|255580943|ref|XP_002531290.1|/0/protein with unknown function [Ricinus communis]
clementine0.9_000161m.g	5886	28.2731	9.33123	17.4848	GO:0043231//intracellular membrane-bounded organelle;GO:0044444//cytoplasmic part	GO:0005083//small GTPase regulator activity	GO:0009553//embryo sac development;GO:0032011//ARF protein signal transduction	gi|255541336|ref|XP_002511732.1|/0/cytohesin 1, 2, 3, putative [Ricinus communis]
clementine0.9_000167m.g	6354	11.8083	4.74905	8.52807	GO:0043231//intracellular membrane-bounded organelle	GO:0000989//transcription factor binding transcription factor activity;GO:0004468//lysine N-acetyltransferase activity;GO:0046914//transition metal ion binding	GO:0006357//regulation of transcription from RNA polymerase II promoter;GO:0009292//genetic transfer;GO:0009648//photoperiodism;GO:0009791//post-embryonic development;GO:0043543	gi|255544454|ref|XP_002513288.1|/0/transcription cofactor, putative [Ricinus communis]
clementine0.9_000168m.g	6163	26.3389	10.2504	11.1545	-	-	-	gi|357443347|ref|XP_003591951.1|/0/Nuclear receptor corepressor [Medicago truncatula]
clementine0.9_000171m.g	5519	5.7417	1.96675	1.72187	-	GO:0003824//catalytic activity	GO:0006281//DNA repair	gi|330370553|gb|AEC12446.1|/0/repressor of gene silencing 1 [Gossypium hirsutum]
clementine0.9_000174m.g	5562	6.83677	0.702555	2.76278	-	GO:0005488//binding	-	gi|255577062|ref|XP_002529415.1|/0/mom(plant), putative [Ricinus communis]
clementine0.9_000175m.g	5682	10.4703	5.73098	12.0276	GO:0009536//plastid	GO:0005083//small GTPase regulator activity	GO:0032011//ARF protein signal transduction	gi|224104801|ref|XP_002313570.1|/0/predicted protein [Populus trichocarpa]
clementine0.9_000184m.g	5202	0.668109	0.375587	2.21548	GO:0042575;GO:0043229//intracellular organelle	GO:0003676//nucleic acid binding;GO:0034061;GO:0046914//transition metal ion binding	GO:0006281//DNA repair;GO:0009411//response to UV	gi|296088359|emb|CBI36804.3|/0/unnamed protein product [Vitis vinifera]
clementine0.9_000185m.g	5487	10.8797	5.26206	10.5757	GO:0005622//intracellular	GO:0003676//nucleic acid binding;GO:0017111//nucleoside-triphosphatase activity;GO:0032559;GO:0046872//metal ion binding	-	gi|297741837|emb|CBI33150.3|/0/unnamed protein product [Vitis vinifera]
clementine0.9_000187m.g	5782	7.95561	2.36538	4.61593	-	-	-	gi|296083262|emb|CBI22898.3|/0/unnamed protein product [Vitis vinifera]
clementine0.9_000191m.g	5562	16.32	6.36203	11.1238	-	-	-	gi|296082317|emb|CBI21322.3|/0/unnamed protein product [Vitis vinifera]
clementine0.9_000192m.g	5363	3.58335	1.70012	3.77012	-	GO:0000166//nucleotide binding;GO:0004674//protein serine/threonine kinase activity	-	gi|255540111|ref|XP_002511120.1|/0/DNA binding protein, putative [Ricinus communis]
clementine0.9_000193m.g	5317	1.46112	0.326635	0.836602	GO:0043234//protein complex;GO:0044464//cell part	GO:0035251//UDP-glucosyltransferase activity	GO:0006074//1,3-beta-D-glucan metabolic process;GO:0009555//pollen development;GO:0009860//pollen tube growth	gi|42570271|ref|NP_849953.2|/0/callose synthase 5 [Arabidopsis thaliana]
clementine0.9_000194m.g	5481	8.46711	3.28743	6.64012	GO:0043231//intracellular membrane-bounded organelle	GO:0003676//nucleic acid binding;GO:0034062//RNA polymerase activity	GO:0010467//gene expression	gi|255571576|ref|XP_002526734.1|/0/DNA-directed RNA polymerase I largest subunit, putative [Ricinus communis]
clementine0.9_000195m.g	5136	1.35339	0.422682	0.236205	-	GO:0000166//nucleotide binding;GO:0004674//protein serine/threonine kinase activity	-	gi|255540111|ref|XP_002511120.1|/0/DNA binding protein, putative [Ricinus communis]
clementine0.9_000196m.g	6889	17.4795	5.19956	12.2976	-	-	-	gi|357511187|ref|XP_003625882.1|/0/MORC family CW-type zinc finger protein [Medicago truncatula]
clementine0.9_000206m.g	5777	67.4512	40.359	101.673	GO:0005905//coated pit;GO:0009536//plastid;GO:0012510//trans-Golgi network transport vesicle membrane	-	GO:0015031//protein transport	gi|255574808|ref|XP_002528311.1|/0/clathrin heavy chain, putative [Ricinus communis]
clementine0.9_000214m.g	5615	8.37427	3.13166	4.21308	-	GO:0003676//nucleic acid binding;GO:0046872//metal ion binding	-	gi|240254615|ref|NP_181609.4|/0/RING-finger, DEAD-like helicase, PHD and SNF2 domain-containing protein [Arabidopsis thaliana]
clementine0.9_000220m.g	5269	3.84128	1.68925	2.18731	GO:0005635//nuclear envelope	GO:0022892	GO:0006605//protein targeting	gi|359488288|ref|XP_003633735.1|/0/PREDICTED: LOW QUALITY PROTEIN: probable disease resistance protein At1g61310-like [Vitis vinifera]
clementine0.9_000221m.g	5296	4.13052	0.983789	1.41259	GO:0043231//intracellular membrane-bounded organelle	GO:0005488//binding	GO:0000902//cell morphogenesis;GO:0003006//developmental process involved in reproduction;GO:0009725//response to hormone stimulus;GO:0016573//histone acetylation;GO:0048827//phyllome development;GO:0070076//histone lysine demethylation	gi|255540401|ref|XP_002511265.1|/0/nucleic acid binding protein, putative [Ricinus communis]
clementine0.9_000227m.g	5401	13.8919	7.39575	16.5093	-	-	-	gi|255542394|ref|XP_002512260.1|/0/guanine nucleotide-exchange, putative [Ricinus communis]
clementine0.9_000228m.g	5553	7.54736	2.46293	4.80628	GO:0031981//nuclear lumen	GO:0003723//RNA binding;GO:0016891//endoribonuclease activity, producing 5'-phosphomonoesters;GO:0017111//nucleoside-triphosphatase activity	GO:0006259//DNA metabolic process;GO:0030422//production of siRNA involved in RNA interference;GO:0035195//gene silencing by miRNA	gi|296081735|emb|CBI20740.3|/0/unnamed protein product [Vitis vinifera]
clementine0.9_000232m.g	5655	16.2686	6.44934	10.6548	GO:0043231//intracellular membrane-bounded organelle	GO:0035251//UDP-glucosyltransferase activity	GO:0002218//activation of innate immune response;GO:0005975//carbohydrate metabolic process;GO:0006464//protein modification process;GO:0009812//flavonoid metabolic process;GO:0010033//response to organic substance;GO:0033554//cellular response to stress	gi|145337405|ref|NP_177278.3|/0/UDP-glucose:glycoprotein glucosyltransferase [Arabidopsis thaliana]
clementine0.9_000233m.g	6330	6.9762	2.57215	4.18438	-	-	-	gi|255540753|ref|XP_002511441.1|/0/DNA binding protein, putative [Ricinus communis]
clementine0.9_000236m.g	5441	28.8946	11.9696	40.9511	GO:0016020//membrane;GO:0043231//intracellular membrane-bounded organelle	-	-	gi|255562613|ref|XP_002522312.1|/0/nucleotide binding protein, putative [Ricinus communis]
clementine0.9_000237m.g	4907	5.16624	2.21204	2.84313	-	-	-	gi|224111284|ref|XP_002332949.1|/0/cc-nbs-lrr resistance protein [Populus trichocarpa]
clementine0.9_000238m.g	5672	27.6457	12.7069	25.4165	-	-	-	gi|297733748|emb|CBI14995.3|/0/unnamed protein product [Vitis vinifera]
clementine0.9_000239m.g	5273	6.51359	1.48212	2.49241	-	-	-	gi|224111284|ref|XP_002332949.1|/0/cc-nbs-lrr resistance protein [Populus trichocarpa]
clementine0.9_000241m.g	5262	3.1859	1.32019	1.15275	GO:0031224//intrinsic to membrane	GO:0015405;GO:0016491//oxidoreductase activity;GO:0016628//oxidoreductase activity, acting on the CH-CH group of donors, NAD or NADP as acceptor;GO:0017111//nucleoside-triphosphatase activity;GO:0032559	GO:0006810//transport;GO:0009207	gi|255571322|ref|XP_002526610.1|/0/mgatp-energized glutathione s-conjugate pump, putative [Ricinus communis]
clementine0.9_000245m.g	5568	10.2808	2.65124	3.01399	GO:0043231//intracellular membrane-bounded organelle	-	GO:0000902//cell morphogenesis;GO:0009725//response to hormone stimulus;GO:0048581;GO:0070076//histone lysine demethylation	gi|255581769|ref|XP_002531686.1|/0/conserved hypothetical protein [Ricinus communis]
clementine0.9_000246m.g	5548	25.4262	10.2519	18.9145	-	-	-	gi|297737648|emb|CBI26849.3|/0/unnamed protein product [Vitis vinifera]
clementine0.9_000251m.g	5265	30.7924	11.7101	20.5072	-	GO:0005488//binding	-	gi|255586318|ref|XP_002533810.1|/0/nuclear receptor binding set domain containing protein 1, nsd, putative [Ricinus communis]
clementine0.9_000257m.g	5231	50.4948	18.9658	44.9143	-	GO:0016307//phosphatidylinositol phosphate kinase activity;GO:0046872//metal ion binding	GO:0006796//phosphate metabolic process;GO:0046488//phosphatidylinositol metabolic process	gi|255570092|ref|XP_002526008.1|/0/fyve finger-containing phosphoinositide kinase, fyv1, putative [Ricinus communis]
clementine0.9_000260m.g	4925	7.22291	1.63093	3.16117	-	GO:0032559	-	gi|302143908|emb|CBI23013.3|/0/unnamed protein product [Vitis vinifera]
clementine0.9_000262m.g	5375	6.58016	1.33283	3.04698	GO:0043076	GO:0004518//nuclease activity;GO:0016799//hydrolase activity, hydrolyzing N-glycosyl compounds;GO:0016835//carbon-oxygen lyase activity;GO:0051536//iron-sulfur cluster binding	GO:0003006//developmental process involved in reproduction;GO:0006281//DNA repair;GO:0006305;GO:0040029//regulation of gene expression, epigenetic	gi|330370551|gb|AEC12445.1|/0/DNA N-glycosylase/DNA-(apurinic or apyrimidinic site) lyase [Gossypium hirsutum]
clementine0.9_000265m.g	4839	2.74617	0.493487	0.793891	-	GO:0004091//carboxylesterase activity;GO:0016744;GO:0016829//lyase activity;GO:0019842//vitamin binding;GO:0046914//transition metal ion binding	GO:0006520//cellular amino acid metabolic process;GO:0009233;GO:0042371//vitamin K biosynthetic process;GO:0042548//regulation of photosynthesis, light reaction	gi|255546995|ref|XP_002514555.1|/0/menaquinone biosynthesis protein, putative [Ricinus communis]
clementine0.9_000266m.g	5922	28.1357	22.0682	57.0179	GO:0043231//intracellular membrane-bounded organelle	GO:0016787//hydrolase activity	-	gi|297738512|emb|CBI27757.3|/0/unnamed protein product [Vitis vinifera]
clementine0.9_000268m.g	5226	3.71641	3.57246	1.31544	-	GO:0046872//metal ion binding	-	gi|296085211|emb|CBI28706.3|/0/unnamed protein product [Vitis vinifera]
clementine0.9_000269m.g	4849	11.4258	3.53683	10.7163	GO:0043234//protein complex;GO:0044464//cell part	GO:0035251//UDP-glucosyltransferase activity	GO:0006074//1,3-beta-D-glucan metabolic process	gi|255571406|ref|XP_002526651.1|/0/transferase, transferring glycosyl groups, putative [Ricinus communis]
clementine0.9_000272m.g	5122	31.8916	13.0542	20.7639	GO:0016020//membrane	-	-	gi|307136393|gb|ADN34203.1|/0/aquarius [Cucumis melo subsp. melo]
clementine0.9_000279m.g	5350	23.3866	11.4023	18.1406	-	GO:0003676//nucleic acid binding;GO:0017111//nucleoside-triphosphatase activity;GO:0032559	GO:0006282//regulation of DNA repair;GO:0006310//DNA recombination;GO:0006351//transcription, DNA-dependent	gi|224139776|ref|XP_002323271.1|/0/chromatin remodeling complex subunit [Populus trichocarpa]
clementine0.9_000285m.g	5395	5.26735	2.45458	7.98273	GO:0015629//actin cytoskeleton	GO:0008092//cytoskeletal protein binding;GO:0017111//nucleoside-triphosphatase activity;GO:0032559	GO:0030029//actin filament-based process	gi|255550191|ref|XP_002516146.1|/0/myosin XI, putative [Ricinus communis]
clementine0.9_000287m.g	4692	0.915019	1.89699	2.32701	-	GO:0003676//nucleic acid binding;GO:0034061	GO:0006259//DNA metabolic process;GO:0009887//organ morphogenesis;GO:0009908//flower development	gi|255565234|ref|XP_002523609.1|/0/DNA polymerase alpha catalytic subunit, putative [Ricinus communis]
clementine0.9_000289m.g	5237	10.4231	3.23334	7.06532	GO:0009507//chloroplast;GO:0016020//membrane	GO:0005488//binding	GO:0000904//cell morphogenesis involved in differentiation;GO:0007155//cell adhesion;GO:0051125//regulation of actin nucleation	gi|255571519|ref|XP_002526707.1|/0/Protein SCAR2, putative [Ricinus communis]
clementine0.9_000291m.g	5405	51.6683	20.3233	41.3361	GO:0031224//intrinsic to membrane;GO:0043231//intracellular membrane-bounded organelle	GO:0015405;GO:0016628//oxidoreductase activity, acting on the CH-CH group of donors, NAD or NADP as acceptor;GO:0017111//nucleoside-triphosphatase activity;GO:0032559	GO:0006865//amino acid transport;GO:0009207	gi|255564132|ref|XP_002523063.1|/0/multidrug resistance-associated protein 2, 6 (mrp2, 6), abc-transoprter, putative [Ricinus communis]
clementine0.9_000292m.g	5109	0.40016	1.5297	4.74907	GO:0044464//cell part	GO:0015604//phosphonate transmembrane transporter activity;GO:0017111//nucleoside-triphosphatase activity;GO:0032559	GO:0009207	gi|297743203|emb|CBI36070.3|/0/unnamed protein product [Vitis vinifera]
clementine0.9_000299m.g	4641	5.33019	2.10494	2.39615	GO:0005635//nuclear envelope;GO:0009536//plastid;GO:0016020//membrane;GO:0031981//nuclear lumen	GO:0005198//structural molecule activity;GO:0005488//binding	GO:0051169//nuclear transport	gi|255570079|ref|XP_002526002.1|/0/protein with unknown function [Ricinus communis]
clementine0.9_000305m.g	4595	13.2587	5.85835	13.3768	-	GO:0000166//nucleotide binding;GO:0042623//ATPase activity, coupled	-	gi|255547213|ref|XP_002514664.1|/0/activating signal cointegrator 1 complex subunit 3, helc1, putative [Ricinus communis]
clementine0.9_000306m.g	4458	3.71462	3.16528	1.81419	-	-	-	gi|359495024|ref|XP_002267933.2|/0/PREDICTED: putative disease resistance protein At3g14460-like [Vitis vinifera]
clementine0.9_000310m.g	4714	15.2225	4.88152	9.90799	-	GO:0004672//protein kinase activity	-	gi|255565121|ref|XP_002523553.1|/0/serine/threonine protein kinase, putative [Ricinus communis]
clementine0.9_000313m.g	4797	9.58919	3.25838	3.83561	-	GO:0003676//nucleic acid binding;GO:0017111//nucleoside-triphosphatase activity;GO:0032559	-	gi|302143565|emb|CBI22318.3|/0/unnamed protein product [Vitis vinifera]
clementine0.9_000314m.g	6324	27.4787	40.6442	68.9638	GO:0009526//plastid envelope;GO:0009532//plastid stroma	GO:0004672//protein kinase activity;GO:0032559;GO:0043169//cation binding	GO:0006796//phosphate metabolic process;GO:0009409//response to cold;GO:0009608//response to symbiont;GO:0044238//primary metabolic process	gi|57012985|sp|Q8LPT9.1|GWD1_CITRE/0/RecName: Full=Alpha-glucan water dikinase, chloroplastic; AltName: Full=Starch-related protein R1; Flags: Precursor
clementine0.9_000318m.g	4428	1.43128	0.14708	0.22831	-	-	-	gi|359495024|ref|XP_002267933.2|/0/PREDICTED: putative disease resistance protein At3g14460-like [Vitis vinifera]
clementine0.9_000325m.g	4855	17.5175	4.87389	9.99505	GO:0044464//cell part	GO:0005083//small GTPase regulator activity;GO:0042802//identical protein binding	GO:0000578//embryonic axis specification;GO:0000902//cell morphogenesis;GO:0001738//morphogenesis of a polarized epithelium;GO:0003006//developmental process involved in reproduction;GO:0009926//auxin polar transport;GO:0032011//ARF protein signal transduction;GO:0032386//regulation of intracellular transport;GO:0033205//cell cycle cytokinesis;GO:0045229//external encapsulating structure organiza…	gi|255562960|ref|XP_002522485.1|/0/pattern formation protein, putative [Ricinus communis]
clementine0.9_000327m.g	4861	2.98608	12.2813	27.4109	GO:0031224//intrinsic to membrane	GO:0015405;GO:0016628//oxidoreductase activity, acting on the CH-CH group of donors, NAD or NADP as acceptor;GO:0017111//nucleoside-triphosphatase activity;GO:0032559	GO:0006810//transport;GO:0009207	gi|255572985|ref|XP_002527423.1|/0/multidrug resistance-associated protein 1, 3 (mrp1, 3), abc-transoprter, putative [Ricinus communis]
clementine0.9_000328m.g	4774	1.45601	0.227366	0.804701	-	GO:0000166//nucleotide binding;GO:0017111//nucleoside-triphosphatase activity	GO:0006810//transport;GO:0009987//cellular process	gi|224061172|ref|XP_002300362.1|/0/multidrug resistance protein ABC transporter family [Populus trichocarpa]
clementine0.9_000337m.g	4981	141.274	46.4164	67.952	GO:0044464//cell part	GO:0000166//nucleotide binding;GO:0015604//phosphonate transmembrane transporter activity;GO:0017111//nucleoside-triphosphatase activity;GO:0032559	GO:0009207	gi|255587046|ref|XP_002534113.1|/0/ATP-binding cassette transporter, putative [Ricinus communis]//gi|359481989|ref|XP_002277172.2|/0/PREDICTED: pleiotropic drug resistance protein 2 [Vitis vinifera]
clementine0.9_000339m.g	4896	3.6746	1.37455	2.31265	GO:0043231//intracellular membrane-bounded organelle	GO:0005488//binding	GO:0031124//mRNA 3'-end processing	gi|255539681|ref|XP_002510905.1|/0/cleavage and polyadenylation specificity factor cpsf, putative [Ricinus communis]
clementine0.9_000340m.g	4705	10.6457	31.1908	56.6824	GO:0044464//cell part	GO:0015604//phosphonate transmembrane transporter activity;GO:0017111//nucleoside-triphosphatase activity;GO:0032559	GO:0009207	gi|255587046|ref|XP_002534113.1|/0/ATP-binding cassette transporter, putative [Ricinus communis]
clementine0.9_000343m.g	4754	2.58025	1.64393	6.12444	GO:0044464//cell part	GO:0015604//phosphonate transmembrane transporter activity;GO:0017111//nucleoside-triphosphatase activity;GO:0032559	GO:0009207	gi|255587046|ref|XP_002534113.1|/0/ATP-binding cassette transporter, putative [Ricinus communis]
clementine0.9_000345m.g	4368	4.21239	1.1928	2.54591	GO:0044464//cell part	GO:0015604//phosphonate transmembrane transporter activity;GO:0017111//nucleoside-triphosphatase activity;GO:0032559	GO:0009207	gi|297743362|emb|CBI36229.3|/0/unnamed protein product [Vitis vinifera]
clementine0.9_000347m.g	4725	3.33164	1.14862	2.56751	GO:0043231//intracellular membrane-bounded organelle	GO:0005488//binding;GO:0016787//hydrolase activity	GO:0000902//cell morphogenesis;GO:0003006//developmental process involved in reproduction;GO:0006952//defense response;GO:0007063//regulation of sister chromatid cohesion;GO:0009719;GO:0010260//organ senescence;GO:0019222//regulation of metabolic process;GO:0019759;GO:0048511//rhythmic process;GO:0051304//chromosome separation	gi|255576219|ref|XP_002529003.1|/0/separase, putative [Ricinus communis]//gi|298204605|emb|CBI23880.3|/0/unnamed protein product [Vitis vinifera]
clementine0.9_000348m.g	5076	2.61795	0.171071	0.0796657	GO:0044464//cell part	GO:0015604//phosphonate transmembrane transporter activity;GO:0017111//nucleoside-triphosphatase activity;GO:0032559	GO:0009207	gi|297743362|emb|CBI36229.3|/0/unnamed protein product [Vitis vinifera]
clementine0.9_000349m.g	5515	6.70968	9.64405	17.0479	GO:0044464//cell part	GO:0016887//ATPase activity;GO:0032559;GO:0042626//ATPase activity, coupled to transmembrane movement of substances	GO:0009207	gi|297743362|emb|CBI36229.3|/0/unnamed protein product [Vitis vinifera]
clementine0.9_000350m.g	4664	5.56691	3.8633	8.97377	GO:0044464//cell part	GO:0005083//small GTPase regulator activity;GO:0042802//identical protein binding	GO:0000578//embryonic axis specification;GO:0000902//cell morphogenesis;GO:0001738//morphogenesis of a polarized epithelium;GO:0003006//developmental process involved in reproduction;GO:0006996//organelle organization;GO:0009926//auxin polar transport;GO:0032011//ARF protein signal transduction;GO:0032386//regulation of intracellular transport;GO:0033205//cell cycle cytokinesis;GO:0045229//extern…	gi|255578296|ref|XP_002530015.1|/0/pattern formation protein, putative [Ricinus communis]
clementine0.9_000353m.g	5148	21.3258	12.187	25.0187	-	GO:0030528//transcription regulator activity	GO:0006355//regulation of transcription, DNA-dependent;GO:0009725//response to hormone stimulus	gi|296086479|emb|CBI32068.3|/0/unnamed protein product [Vitis vinifera]
clementine0.9_000355m.g	4992	11.5899	3.87039	7.20956	GO:0031410//cytoplasmic vesicle	-	-	gi|297742170|emb|CBI33957.3|/0/unnamed protein product [Vitis vinifera]
clementine0.9_000360m.g	4966	4.03449	1.04916	1.30289	GO:0044451//nucleoplasm part	GO:0005488//binding;GO:0016779//nucleotidyltransferase activity	GO:0006342//chromatin silencing;GO:0007154//cell communication;GO:0016246//RNA interference	gi|224053985|ref|XP_002298071.1|/0/RNA polymerase IV subunit [Populus trichocarpa]
clementine0.9_000361m.g	4784	2.90594	0.181513	0.633962	GO:0016020//membrane	GO:0000166//nucleotide binding;GO:0015604//phosphonate transmembrane transporter activity;GO:0032559;GO:0042626//ATPase activity, coupled to transmembrane movement of substances	GO:0009207	gi|255543331|ref|XP_002512728.1|/0/ATP-binding cassette transporter, putative [Ricinus communis]//gi|359482991|ref|XP_003632876.1|/0/PREDICTED: pleiotropic drug resistance protein 1 isoform 3 [Vitis vinifera]
clementine0.9_000362m.g	5055	10.4748	3.09208	8.11966	-	GO:0000166//nucleotide binding;GO:0004672//protein kinase activity	-	gi|255546109|ref|XP_002514114.1|/0/conserved hypothetical protein [Ricinus communis]
clementine0.9_000365m.g	4885	26.0312	7.95476	12.4999	GO:0016020//membrane;GO:0043231//intracellular membrane-bounded organelle;GO:0044444//cytoplasmic part	GO:0004702//receptor signaling protein serine/threonine kinase activity;GO:0032559	GO:0006464//protein modification process;GO:0016044//cellular membrane organization;GO:0048229//gametophyte development	gi|297737926|emb|CBI27127.3|/0/unnamed protein product [Vitis vinifera]
clementine0.9_000367m.g	4995	13.302	6.04113	15.1391	-	-	-	gi|297734072|emb|CBI15319.3|/1.79228e-137/unnamed protein product [Vitis vinifera]//gi|297734072|emb|CBI15319.3|/1.8155e-137/unnamed protein product [Vitis vinifera]//gi|297734072|emb|CBI15319.3|/1.83016e-137/unnamed protein product [Vitis vinifera]//gi|297734072|emb|CBI15319.3|/2.18137e-146/unnamed protein product [Vitis vinifera]//gi|297734072|emb|CBI15319.3|/2.18758e-146/unnamed protein produc…
clementine0.9_000370m.g	4866	17.1418	4.77365	11.6761	-	GO:0003676//nucleic acid binding;GO:0017111//nucleoside-triphosphatase activity;GO:0032559;GO:0046914//transition metal ion binding	GO:0048229//gametophyte development	gi|357446441|ref|XP_003593498.1|/0/Helicase-like transcription factor [Medicago truncatula]//gi|359494872|ref|XP_002263027.2|/0/PREDICTED: uncharacterized protein LOC100265351 [Vitis vinifera]
clementine0.9_000373m.g	4574	2.72648	0.806848	1.10511	-	-	-	gi|284026888|gb|ADB66335.1|/0/CC-NBS-LRR protein [Quercus suber]
clementine0.9_000380m.g	5957	3.84379	0.947512	1.08614	-	-	-	gi|284026888|gb|ADB66335.1|/0/CC-NBS-LRR protein [Quercus suber]
clementine0.9_000384m.g	4771	7.11324	3.00312	5.84834	-	-	-	gi|302144136|emb|CBI23241.3|/0/unnamed protein product [Vitis vinifera]
clementine0.9_000387m.g	4722	34.7663	18.4816	37.2526	GO:0009536//plastid;GO:0016020//membrane	GO:0005488//binding	-	gi|255544272|ref|XP_002513198.1|/0/eukaryotic translation initiation factor 3 subunit, putative [Ricinus communis]
clementine0.9_000390m.g	5513	31.2985	5.15848	9.13218	GO:0044464//cell part	GO:0015604//phosphonate transmembrane transporter activity;GO:0017111//nucleoside-triphosphatase activity;GO:0032559	GO:0009207	gi|224143447|ref|XP_002324959.1|/0/predicted protein [Populus trichocarpa]//gi|255549008|ref|XP_002515560.1|/0/ATP-binding cassette transporter, putative [Ricinus communis]//gi|280967727|gb|ACZ98533.1|/0/putative ABC transporter [Malus x domestica]
clementine0.9_000391m.g	4855	7.5376	1.87801	3.53991	-	-	-	gi|357514165|ref|XP_003627371.1|/0/COP1-interacting protein 7 (CIP7)-like protein [Medicago truncatula]
clementine0.9_000393m.g	5176	17.6951	6.08153	8.86737	GO:0005819//spindle;GO:0016020//membrane	-	GO:0000087//M phase of mitotic cell cycle;GO:0031647//regulation of protein stability;GO:0040007//growth	gi|224069969|ref|XP_002303094.1|/0/predicted protein [Populus trichocarpa]
clementine0.9_000394m.g	4976	4.51941	1.78872	2.03167	GO:0043234//protein complex	GO:0005488//binding	GO:0019941//modification-dependent protein catabolic process	gi|297736590|emb|CBI25461.3|/0/unnamed protein product [Vitis vinifera]
clementine0.9_000399m.g	5318	102.298	277.097	111.513	GO:0016020//membrane	GO:0000166//nucleotide binding;GO:0003723//RNA binding	GO:0044237//cellular metabolic process;GO:0044238//primary metabolic process	gi|359493041|ref|XP_002267014.2|/0/PREDICTED: uncharacterized protein LOC100242745 [Vitis vinifera]
clementine0.9_000403m.g	4457	0.229349	0.876736	2.04142	-	-	-	gi|224111284|ref|XP_002332949.1|/0/cc-nbs-lrr resistance protein [Populus trichocarpa]
clementine0.9_000404m.g	5319	17.4884	6.44861	8.1348	GO:0009532//plastid stroma	GO:0016884//carbon-nitrogen ligase activity, with glutamine as amido-N-donor;GO:0032559	GO:0006188//IMP biosynthetic process;GO:0048229//gametophyte development	gi|255566446|ref|XP_002524208.1|/0/Phosphoribosylformylglycinamidine synthase, putative [Ricinus communis]
clementine0.9_000405m.g	4828	0.127035	0.314753	1.25637	-	-	-	gi|255563252|ref|XP_002522629.1|/0/Disease resistance protein RPS5, putative [Ricinus communis]
clementine0.9_000406m.g	5278	3.0213	0.987144	1.34079	-	-	-	gi|224083434|ref|XP_002307025.1|/0/cc-nbs-lrr resistance protein [Populus trichocarpa]//gi|255563252|ref|XP_002522629.1|/0/Disease resistance protein RPS5, putative [Ricinus communis]
clementine0.9_000413m.g	4963	11.9048	4.02423	8.5961	-	-	-	gi|224109680|ref|XP_002315275.1|/0/predicted protein [Populus trichocarpa]
clementine0.9_000415m.g	4974	8.96024	4.2772	6.50395	-	-	-	gi|296087054|emb|CBI33381.3|/0/unnamed protein product [Vitis vinifera]
clementine0.9_000418m.g	4550	1.16824	0.190848	0.355502	-	-	-	gi|224111284|ref|XP_002332949.1|/0/cc-nbs-lrr resistance protein [Populus trichocarpa]
clementine0.9_000422m.g	4973	19.1163	8.81803	23.0124	-	-	-	gi|224061663|ref|XP_002300592.1|/0/predicted protein [Populus trichocarpa]
clementine0.9_000424m.g	4828	1.43973	0.134894	0.460669	-	-	-	gi|224143316|ref|XP_002336027.1|/0/cc-nbs-lrr resistance protein [Populus trichocarpa]
clementine0.9_000429m.g	4531	25.448	8.24087	14.2351	GO:0031224//intrinsic to membrane	GO:0032559;GO:0042626//ATPase activity, coupled to transmembrane movement of substances	GO:0006810//transport;GO:0009207	gi|224112851|ref|XP_002316309.1|/0/multidrug/pheromone exporter, MDR family, ABC transporter family [Populus trichocarpa]
clementine0.9_000432m.g	4447	1.37919	1.46451	4.6831	-	GO:0003723//RNA binding;GO:0016891//endoribonuclease activity, producing 5'-phosphomonoesters;GO:0042623//ATPase activity, coupled	GO:0002252;GO:0006259//DNA metabolic process;GO:0030422//production of siRNA involved in RNA interference;GO:0035195//gene silencing by miRNA	gi|255547506|ref|XP_002514810.1|/0/ATP binding protein, putative [Ricinus communis]
clementine0.9_000436m.g	4341	1.36577	0.100018	0.419195	-	-	-	gi|284026888|gb|ADB66335.1|/0/CC-NBS-LRR protein [Quercus suber]
clementine0.9_000439m.g	4267	1.77275	0.305258	0.28431	-	GO:0016623;GO:0046914//transition metal ion binding;GO:0050662//coenzyme binding;GO:0051536//iron-sulfur cluster binding	GO:0008152//metabolic process	gi|255549585|ref|XP_002515844.1|/0/aldehyde oxidase, putative [Ricinus communis]
clementine0.9_000440m.g	4188	4.58871	1.2959	1.68976	-	-	-	gi|284026888|gb|ADB66335.1|/0/CC-NBS-LRR protein [Quercus suber]
clementine0.9_000445m.g	4179	3.52232	0.935059	0.919273	-	-	-	gi|284026888|gb|ADB66335.1|/0/CC-NBS-LRR protein [Quercus suber]
clementine0.9_000449m.g	4427	5.07987	1.32402	1.87257	-	-	-	gi|224111284|ref|XP_002332949.1|/0/cc-nbs-lrr resistance protein [Populus trichocarpa]
clementine0.9_000450m.g	4639	16.3941	4.07131	9.15289	-	-	-	gi|255584708|ref|XP_002533075.1|/0/glutathione peroxidase, putative [Ricinus communis]
clementine0.9_000451m.g	4505	1.54295	0.33732	0.26929	-	-	-	gi|224111284|ref|XP_002332949.1|/0/cc-nbs-lrr resistance protein [Populus trichocarpa]
clementine0.9_000455m.g	4158	2.36007	0.20884	1.02117	-	-	-	gi|284026888|gb|ADB66335.1|/0/CC-NBS-LRR protein [Quercus suber]
clementine0.9_000457m.g	4410	15.0665	5.66106	13.3419	GO:0043234//protein complex	GO:0005488//binding;GO:0030528//transcription regulator activity	GO:0000904//cell morphogenesis involved in differentiation;GO:0007015//actin filament organization;GO:0016049//cell growth	gi|297737983|emb|CBI27184.3|/0/unnamed protein product [Vitis vinifera]
clementine0.9_000461m.g	4450	4.73202	0.439057	1.13591	-	GO:0016623;GO:0046914//transition metal ion binding;GO:0050662//coenzyme binding;GO:0051536//iron-sulfur cluster binding	GO:0008152//metabolic process	gi|255549585|ref|XP_002515844.1|/0/aldehyde oxidase, putative [Ricinus communis]
clementine0.9_000462m.g	4696	79.0165	34.4403	53.6479	-	-	-	gi|24461867|gb|AAN62354.1|AF506028_23/0/CTV.22 [Citrus trifoliata]
clementine0.9_000465m.g	4518	6.19931	1.29735	2.37188	GO:0009528//plastid inner membrane;GO:0043234//protein complex	GO:0051003	GO:0006779//porphyrin biosynthetic process	gi|255582591|ref|XP_002532078.1|/0/Magnesium-chelatase subunit H, putative [Ricinus communis]
clementine0.9_000467m.g	4670	33.1397	14.7825	20.6954	-	-	-	gi|255565011|ref|XP_002523498.1|/0/ATP binding protein, putative [Ricinus communis]
clementine0.9_000474m.g	4400	2.09088	0.394708	1.51644	-	GO:0008092//cytoskeletal protein binding	GO:0007010//cytoskeleton organization	gi|296082128|emb|CBI21133.3|/0/unnamed protein product [Vitis vinifera]
clementine0.9_000476m.g	4300	8.93837	2.62527	9.31022	-	-	-	gi|297745966|emb|CBI16022.3|/3.90194e-152/unnamed protein product [Vitis vinifera]
clementine0.9_000487m.g	4588	0.04456	3.07559	3.78999	-	-	-	gi|224111296|ref|XP_002332952.1|/0/cc-nbs-lrr resistance protein [Populus trichocarpa]
clementine0.9_000488m.g	4162	2.06308	0.15648	0.728706	-	-	-	gi|224111296|ref|XP_002332952.1|/0/cc-nbs-lrr resistance protein [Populus trichocarpa]
clementine0.9_000500m.g	5264	19.1081	7.79444	15.9787	GO:0015629//actin cytoskeleton	GO:0008092//cytoskeletal protein binding;GO:0017111//nucleoside-triphosphatase activity;GO:0032559	GO:0000904//cell morphogenesis involved in differentiation;GO:0007275//multicellular organismal development;GO:0030029//actin filament-based process;GO:0040007//growth;GO:0048608//reproductive structure development;GO:0051640//organelle localization	gi|297743058|emb|CBI35925.3|/0/unnamed protein product [Vitis vinifera]
clementine0.9_000501m.g	4767	2.53032	0.31878	0.424149	-	-	-	gi|224143316|ref|XP_002336027.1|/0/cc-nbs-lrr resistance protein [Populus trichocarpa]
clementine0.9_000504m.g	5201	6.09276	9.68367	13.7231	GO:0031224//intrinsic to membrane	GO:0015405;GO:0016628//oxidoreductase activity, acting on the CH-CH group of donors, NAD or NADP as acceptor;GO:0017111//nucleoside-triphosphatase activity;GO:0032559	GO:0006810//transport;GO:0009207	gi|224132090|ref|XP_002321253.1|/0/multidrug resistance protein ABC transporter family [Populus trichocarpa]
clementine0.9_000505m.g	4698	11.0097	5.40644	6.58478	-	-	-	gi|255584148|ref|XP_002532814.1|/0/nfrkb, putative [Ricinus communis]
clementine0.9_000509m.g	4783	21.0725	4.62955	9.25778	GO:0031224//intrinsic to membrane	GO:0005515//protein binding;GO:0015562//efflux transmembrane transporter activity;GO:0019829//cation-transporting ATPase activity;GO:0032559	GO:0009207;GO:0009630//gravitropism;GO:0009639//response to red or far red light;GO:0009734//auxin mediated signaling pathway;GO:0032535;GO:0043479;GO:0048437//floral organ development;GO:0051707//response to other organism;GO:0060918//auxin transport	gi|255556910|ref|XP_002519488.1|/0/multidrug resistance protein 1, 2, putative [Ricinus communis]
clementine0.9_000511m.g	4366	17.4192	5.32033	11.8092	-	-	-	gi|255551783|ref|XP_002516937.1|/0/nucleotide binding protein, putative [Ricinus communis]
clementine0.9_000514m.g	4035	1.21601	0.484215	3.00657	GO:0043229//intracellular organelle;GO:0044444//cytoplasmic part	GO:0000166//nucleotide binding;GO:0003777//microtubule motor activity	GO:0000911//cytokinesis by cell plate formation;GO:0032502//developmental process	gi|298205235|emb|CBI17294.3|/0/unnamed protein product [Vitis vinifera]
clementine0.9_000515m.g	4320	0.141973	0.001	0.748858	GO:0044444//cytoplasmic part	GO:0004674//protein serine/threonine kinase activity;GO:0032559	GO:0006464//protein modification process;GO:0007349//cellularization	gi|297737352|emb|CBI26553.3|/0/unnamed protein product [Vitis vinifera]
clementine0.9_000518m.g	4199	10.8575	4.23942	11.3639	GO:0043231//intracellular membrane-bounded organelle	GO:0032559;GO:0042623//ATPase activity, coupled	-	gi|255558832|ref|XP_002520439.1|/0/helicase, putative [Ricinus communis]
clementine0.9_000523m.g	5500	6.3191	2.44719	4.99965	-	GO:0003676//nucleic acid binding;GO:0046872//metal ion binding	-	gi|224072879|ref|XP_002303924.1|/0/chromatin remodeling complex subunit [Populus trichocarpa]
clementine0.9_000525m.g	5038	16.9218	9.78152	23.2773	GO:0016020//membrane;GO:0031224//intrinsic to membrane	GO:0000166//nucleotide binding;GO:0032559;GO:0042626//ATPase activity, coupled to transmembrane movement of substances	GO:0006810//transport;GO:0009207;GO:0009987//cellular process	gi|224083701|ref|XP_002307090.1|/0/peroxisomal membrane ABC transporter family, PMP family [Populus trichocarpa]
clementine0.9_000526m.g	4203	4.08591	1.65283	2.54964	-	GO:0046872//metal ion binding	-	gi|255566581|ref|XP_002524275.1|/0/DNA binding protein, putative [Ricinus communis]
clementine0.9_000532m.g	4527	2.30318	0.815225	2.85846	-	GO:0005488//binding	-	gi|30688568|ref|NP_194744.2|/0/uncharacterized protein [Arabidopsis thaliana]
clementine0.9_000534m.g	4979	197.749	71.4185	107.207	GO:0044444//cytoplasmic part	GO:0004672//protein kinase activity	-	gi|297737995|emb|CBI27196.3|/0/unnamed protein product [Vitis vinifera]
clementine0.9_000536m.g	4389	2.51534	1.4344	3.96183	GO:0043231//intracellular membrane-bounded organelle	GO:0004468//lysine N-acetyltransferase activity	GO:0006357//regulation of transcription from RNA polymerase II promoter;GO:0009292//genetic transfer;GO:0009648//photoperiodism;GO:0009791//post-embryonic development;GO:0043543	gi|224079880|ref|XP_002305957.1|/0/histone acetyltransferase [Populus trichocarpa]
clementine0.9_000538m.g	4619	5.39984	2.58496	5.034	GO:0043231//intracellular membrane-bounded organelle	-	GO:0016441//posttranscriptional gene silencing	gi|255574351|ref|XP_002528089.1|/0/symplekin, putative [Ricinus communis]
clementine0.9_000541m.g	5676	28.6708	11.2446	23.1544	-	GO:0005488//binding	GO:0000160//two-component signal transduction system (phosphorelay);GO:0001738//morphogenesis of a polarized epithelium;GO:0006970//response to osmotic stress;GO:0009738//abscisic acid mediated signaling pathway;GO:0009756//carbohydrate mediated signaling;GO:0009861//jasmonic acid and ethylene-dependent systemic resistance;GO:0010039//response to iron ion;GO:0010118//stomatal movement;GO:0010260/…	gi|312281683|dbj|BAJ33707.1|/0/unnamed protein product [Thellungiella halophila]
clementine0.9_000542m.g	4362	42.1819	41.1086	18.0777	-	-	-	gi|255538700|ref|XP_002510415.1|/1.08226e-149/auxilin, putative [Ricinus communis]//gi|255538700|ref|XP_002510415.1|/9.73406e-154/auxilin, putative [Ricinus communis]
clementine0.9_000543m.g	5126	8.13618	2.9222	4.5361	-	GO:0005506//iron ion binding	-	gi|296085002|emb|CBI28417.3|/0/unnamed protein product [Vitis vinifera]
clementine0.9_000546m.g	4117	13.6063	10.9151	21.9528	GO:0043231//intracellular membrane-bounded organelle;GO:0043234//protein complex	GO:0016788//hydrolase activity, acting on ester bonds;GO:0032559;GO:0046914//transition metal ion binding	GO:0000723//telomere maintenance;GO:0006281//DNA repair;GO:0006310//DNA recombination	gi|18402837|ref|NP_565733.1|/0/DNA repair protein RAD50 [Arabidopsis thaliana]
clementine0.9_000547m.g	4455	25.1479	6.09118	10.3025	-	-	-	gi|296083674|emb|CBI23663.3|/0/unnamed protein product [Vitis vinifera]
clementine0.9_000548m.g	4024	0.406444	3.12902	1.4069	GO:0005618//cell wall	GO:0003824//catalytic activity	GO:0008152//metabolic process	gi|296089127|emb|CBI38830.3|/0/unnamed protein product [Vitis vinifera]
clementine0.9_000552m.g	4939	24.3807	9.45014	10.1935	-	GO:0004672//protein kinase activity;GO:0032559	GO:0006464//protein modification process	gi|255560213|ref|XP_002521124.1|/0/serine/threonine protein kinase, putative [Ricinus communis]
clementine0.9_000555m.g	4542	23.0908	10.8975	21.5903	GO:0016020//membrane;GO:0044444//cytoplasmic part	GO:0004674//protein serine/threonine kinase activity;GO:0032559	GO:0006464//protein modification process	gi|255585466|ref|XP_002533426.1|/0/kinase, putative [Ricinus communis]
clementine0.9_000557m.g	4655	5.48984	1.11926	3.43139	GO:0015630//microtubule cytoskeleton;GO:0044444//cytoplasmic part	GO:0003779//actin binding;GO:0015631//tubulin binding	GO:0007010//cytoskeleton organization;GO:0009555//pollen development	gi|255557693|ref|XP_002519876.1|/0/DNA binding protein, putative [Ricinus communis]//gi|296088480|emb|CBI37471.3|/0/unnamed protein product [Vitis vinifera]
clementine0.9_000558m.g	4856	45.8057	11.5787	26.3982	-	-	-	gi|224066501|ref|XP_002302111.1|/0/predicted protein [Populus trichocarpa]//gi|255559430|ref|XP_002520735.1|/2.84256e-180/ATP binding protein, putative [Ricinus communis]//gi|255559430|ref|XP_002520735.1|/4.91658e-180/ATP binding protein, putative [Ricinus communis]
clementine0.9_000559m.g	4419	7.77239	4.12662	3.20285	-	-	-	gi|225432412|ref|XP_002276957.1|/1.29931e-118/PREDICTED: uncharacterized protein LOC100244334 [Vitis vinifera]
clementine0.9_000560m.g	4136	10.1331	2.78185	7.2351	GO:0031090//organelle membrane;GO:0031224//intrinsic to membrane;GO:0043231//intracellular membrane-bounded organelle	GO:0004888//transmembrane receptor activity	GO:0015918//sterol transport	gi|297745553|emb|CBI40718.3|/0/unnamed protein product [Vitis vinifera]
clementine0.9_000563m.g	6434	8.4522	2.96921	6.2851	GO:0044424//intracellular part	GO:0003676//nucleic acid binding;GO:0016741	GO:0009791//post-embryonic development;GO:0009908//flower development;GO:0034968//histone lysine methylation;GO:0048608//reproductive structure development	gi|255539394|ref|XP_002510762.1|/0/set domain protein, putative [Ricinus communis]
clementine0.9_000566m.g	4097	15.2196	6.57044	10.0183	-	GO:0003676//nucleic acid binding;GO:0034061	GO:0006259//DNA metabolic process	gi|296088084|emb|CBI35443.3|/0/unnamed protein product [Vitis vinifera]
clementine0.9_000567m.g	4500	24.9419	5.01718	9.97479	-	-	-	gi|225463725|ref|XP_002264162.1|/1.49113e-170/PREDICTED: uncharacterized protein LOC100261025 [Vitis vinifera]
clementine0.9_000568m.g	4606	7.05736	2.59225	4.96041	GO:0009526//plastid envelope;GO:0015630//microtubule cytoskeleton;GO:0016020//membrane	GO:0003774//motor activity;GO:0015631//tubulin binding;GO:0032559	GO:0000911//cytokinesis by cell plate formation;GO:0007017//microtubule-based process;GO:0009902//chloroplast relocation	gi|297744860|emb|CBI38274.3|/0/unnamed protein product [Vitis vinifera]//gi|356526755|ref|XP_003531982.1|/0/PREDICTED: geminivirus Rep-interacting motor protein-like [Glycine max]//gi|356567769|ref|XP_003552088.1|/0/PREDICTED: geminivirus Rep-interacting motor protein-like [Glycine max]
clementine0.9_000572m.g	4913	0.291286	0.176747	1.31694	GO:0009536//plastid	GO:0003676//nucleic acid binding;GO:0003678//DNA helicase activity;GO:0032559	-	gi|255539256|ref|XP_002510693.1|/0/brca1 interacting protein helicase 1 brip1, putative [Ricinus communis]
clementine0.9_000573m.g	4420	3.46903	2.06284	4.52873	GO:0043231//intracellular membrane-bounded organelle	GO:0003690//double-stranded DNA binding;GO:0032559	GO:0006281//DNA repair	gi|255548475|ref|XP_002515294.1|/0/ATP binding protein, putative [Ricinus communis]
clementine0.9_000574m.g	4001	0.766464	1.19369	2.27409	GO:0031224//intrinsic to membrane	GO:0015114//phosphate transmembrane transporter activity;GO:0032559;GO:0042626//ATPase activity, coupled to transmembrane movement of substances	GO:0009207;GO:0009606//tropism;GO:0009734//auxin mediated signaling pathway;GO:0009926//auxin polar transport;GO:0048588//developmental cell growth	gi|224130858|ref|XP_002320942.1|/0/multidrug/pheromone exporter, MDR family, ABC transporter family [Populus trichocarpa]
clementine0.9_000575m.g	3867	2.11473	0.112278	0.888869	-	-	-	gi|255541368|ref|XP_002511748.1|/0/nucleotide binding protein, putative [Ricinus communis]
clementine0.9_000576m.g	4631	13.8619	4.87526	9.47432	-	-	-	gi|297738627|emb|CBI27872.3|/0/unnamed protein product [Vitis vinifera]
clementine0.9_000581m.g	4029	9.84404	2.80185	9.33424	-	-	-	gi|255572503|ref|XP_002527186.1|/0/nucleotide binding protein, putative [Ricinus communis]
clementine0.9_000585m.g	4331	27.9449	46.265	20.4012	GO:0005667//transcription factor complex	GO:0000989//transcription factor binding transcription factor activity;GO:0003676//nucleic acid binding;GO:0004468//lysine N-acetyltransferase activity	GO:0009292//genetic transfer;GO:0009314//response to radiation;GO:0016570//histone modification	gi|302143274|emb|CBI21835.3|/0/unnamed protein product [Vitis vinifera]
clementine0.9_000587m.g	3980	2.77383	0.490906	0.558821	-	GO:0000166//nucleotide binding;GO:0003774//motor activity	-	gi|255545966|ref|XP_002514043.1|/0/Chromosome-associated kinesin KIF4A, putative [Ricinus communis]//gi|302142065|emb|CBI19268.3|/0/unnamed protein product [Vitis vinifera]
clementine0.9_000591m.g	4195	4.53231	1.13849	1.54234	-	-	-	gi|296086330|emb|CBI31771.3|/1.06499e-162/unnamed protein product [Vitis vinifera]
clementine0.9_000597m.g	4267	19.2128	55.4553	32.8378	-	-	-	gi|297739813|emb|CBI29995.3|/0/unnamed protein product [Vitis vinifera]
clementine0.9_000599m.g	3834	2.77281	0.226489	0.421892	-	-	-	gi|284026888|gb|ADB66335.1|/0/CC-NBS-LRR protein [Quercus suber]
clementine0.9_000602m.g	4482	9.8526	3.87487	6.045	-	-	GO:0016043//cellular component organization	gi|255584461|ref|XP_002532961.1|/0/actin binding protein, putative [Ricinus communis]//gi|296082128|emb|CBI21133.3|/0/unnamed protein product [Vitis vinifera]
clementine0.9_000611m.g	4096	8.08582	4.82303	9.82327	-	-	-	gi|225442343|ref|XP_002276282.1|/4.82891e-152/PREDICTED: uncharacterized protein LOC100258409 [Vitis vinifera]
clementine0.9_000614m.g	3795	23.0569	4.06149	3.56965	GO:0031224//intrinsic to membrane	GO:0015405;GO:0017111//nucleoside-triphosphatase activity;GO:0032559	GO:0006810//transport;GO:0009207	gi|325977001|gb|ADZ48235.1|/0/multidrug/pheromone exporter protein [Hevea brasiliensis]
clementine0.9_000615m.g	5179	14.6453	4.19173	9.17456	GO:0031224//intrinsic to membrane;GO:0043231//intracellular membrane-bounded organelle	GO:0005548//phospholipid transporter activity;GO:0032559;GO:0042625//ATPase activity, coupled to transmembrane movement of ions;GO:0046872//metal ion binding	GO:0006869//lipid transport;GO:0009206	gi|255575596|ref|XP_002528698.1|/0/phospholipid-transporting atpase, putative [Ricinus communis]
clementine0.9_000620m.g	4686	58.549	13.4349	28.1325	GO:0009532//plastid stroma	GO:0004175//endopeptidase activity;GO:0046914//transition metal ion binding	GO:0019538//protein metabolic process	gi|297745637|emb|CBI40802.3|/0/unnamed protein product [Vitis vinifera]
clementine0.9_000623m.g	4353	17.1894	6.03442	14.2598	GO:0043231//intracellular membrane-bounded organelle	GO:0003676//nucleic acid binding	GO:0006351//transcription, DNA-dependent	gi|255561935|ref|XP_002521976.1|/0/transcription factor, putative [Ricinus communis]
clementine0.9_000624m.g	3888	5.36343	0.0558358	0.001	GO:0031224//intrinsic to membrane	GO:0015405;GO:0017111//nucleoside-triphosphatase activity;GO:0032559	GO:0006810//transport;GO:0009207	gi|325977001|gb|ADZ48235.1|/0/multidrug/pheromone exporter protein [Hevea brasiliensis]
clementine0.9_000625m.g	4011	11.3154	5.19586	8.41835	GO:0043234//protein complex;GO:0044424//intracellular part	GO:0030528//transcription regulator activity	GO:0000904//cell morphogenesis involved in differentiation;GO:0007015//actin filament organization	gi|296085165|emb|CBI28660.3|/0/unnamed protein product [Vitis vinifera]
clementine0.9_000626m.g	4098	11.4244	4.29093	9.47311	-	-	GO:0009987//cellular process	gi|15238938|ref|NP_196665.1|/0/protein TRS120 [Arabidopsis thaliana]
clementine0.9_000628m.g	4449	4.64118	1.80542	2.22688	-	-	-	gi|302143649|emb|CBI22402.3|/1.14412e-122/unnamed protein product [Vitis vinifera]
clementine0.9_000629m.g	4426	66.3765	26.0939	48.6977	-	GO:0000166//nucleotide binding;GO:0017111//nucleoside-triphosphatase activity	-	gi|297743865|emb|CBI36835.3|/0/unnamed protein product [Vitis vinifera]
clementine0.9_000636m.g	4975	2.71219	1.26545	0.487698	-	-	-	gi|224111296|ref|XP_002332952.1|/0/cc-nbs-lrr resistance protein [Populus trichocarpa]
clementine0.9_000638m.g	4057	12.9004	3.31761	3.78767	GO:0031224//intrinsic to membrane	GO:0032559;GO:0042626//ATPase activity, coupled to transmembrane movement of substances	GO:0006810//transport;GO:0009207	gi|255538998|ref|XP_002510564.1|/0/multidrug resistance protein 1, 2, putative [Ricinus communis]
clementine0.9_000639m.g	4070	7.88632	3.46703	4.6201	-	GO:0008092//cytoskeletal protein binding	GO:0003006//developmental process involved in reproduction;GO:0043623//cellular protein complex assembly;GO:0044267//cellular protein metabolic process	gi|255541236|ref|XP_002511682.1|/0/beta-tubulin cofactor d, putative [Ricinus communis]
clementine0.9_000641m.g	4184	8.69756	0.726399	0.724874	-	GO:0000166//nucleotide binding;GO:0017111//nucleoside-triphosphatase activity	GO:0006810//transport;GO:0009987//cellular process	gi|325977001|gb|ADZ48235.1|/0/multidrug/pheromone exporter protein [Hevea brasiliensis]
clementine0.9_000642m.g	4250	13.8539	9.60302	22.4552	GO:0031224//intrinsic to membrane	GO:0015562//efflux transmembrane transporter activity;GO:0032559;GO:0042626//ATPase activity, coupled to transmembrane movement of substances	GO:0009207;GO:0009630//gravitropism;GO:0009639//response to red or far red light;GO:0009734//auxin mediated signaling pathway;GO:0009926//auxin polar transport;GO:0032535;GO:0043479;GO:0048437//floral organ development;GO:0048528//post-embryonic root development	gi|255552900|ref|XP_002517493.1|/0/multidrug resistance protein 1, 2, putative [Ricinus communis]
clementine0.9_000643m.g	4741	15.8689	6.96005	11.7707	GO:0043231//intracellular membrane-bounded organelle	-	GO:0007623//circadian rhythm;GO:0009409//response to cold;GO:2000028//regulation of photoperiodism, flowering	gi|255556001|ref|XP_002519035.1|/0/conserved hypothetical protein [Ricinus communis]
clementine0.9_000646m.g	4196	4.38507	3.00076	1.8311	-	-	-	gi|224127917|ref|XP_002329209.1|/0/tir-nbs-lrr resistance protein [Populus trichocarpa]
clementine0.9_000649m.g	4259	3.16815	1.37624	2.61107	-	-	-	gi|255552892|ref|XP_002517489.1|/0/conserved hypothetical protein [Ricinus communis]
clementine0.9_000650m.g	3990	13.2195	6.14815	13.2261	-	-	-	gi|296086267|emb|CBI31708.3|/0/unnamed protein product [Vitis vinifera]
clementine0.9_000651m.g	4842	6.12227	2.86942	5.09446	-	GO:0000166//nucleotide binding;GO:0017111//nucleoside-triphosphatase activity	-	gi|357469581|ref|XP_003605075.1|/0/Pre-mRNA-splicing factor ATP-dependent RNA helicase PRP16 [Medicago truncatula]
clementine0.9_000652m.g	4700	13.4409	3.74133	14.3685	-	-	-	gi|255547434|ref|XP_002514774.1|/0/cohesin subunit rad21, putative [Ricinus communis]//gi|296083395|emb|CBI23350.3|/0/unnamed protein product [Vitis vinifera]
clementine0.9_000653m.g	4258	3.84108	1.52952	2.94408	-	GO:0005488//binding	-	gi|296081870|emb|CBI20875.3|/1.92748e-127/unnamed protein product [Vitis vinifera]
clementine0.9_000658m.g	4287	13.2575	4.91199	9.33845	GO:0043231//intracellular membrane-bounded organelle;GO:0043232	GO:0032559	GO:0006996//organelle organization	gi|224140989|ref|XP_002323859.1|/0/condensin complex components subunit [Populus trichocarpa]
clementine0.9_000664m.g	3927	3.12363	0.939781	3.2952	GO:0043231//intracellular membrane-bounded organelle	GO:0017111//nucleoside-triphosphatase activity;GO:0032559	-	gi|255547101|ref|XP_002514608.1|/0/dead box ATP-dependent RNA helicase, putative [Ricinus communis]
clementine0.9_000668m.g	3993	8.3456	1.19609	2.73437	GO:0016020//membrane	GO:0005488//binding	-	gi|302142040|emb|CBI19243.3|/0/unnamed protein product [Vitis vinifera]
clementine0.9_000669m.g	3693	2.32509	0.29392	0.711749	-	-	-	gi|225436551|ref|XP_002274375.1|/0/PREDICTED: putative disease resistance protein At3g14460-like [Vitis vinifera]
clementine0.9_000670m.g	4224	10.9868	2.41553	5.21754	-	-	-	gi|224116536|ref|XP_002331921.1|/0/predicted protein [Populus trichocarpa]
clementine0.9_000675m.g	5364	10.7099	8.49903	22.2396	GO:0044464//cell part	GO:0004673//protein histidine kinase activity;GO:0004888//transmembrane receptor activity;GO:0016791//phosphatase activity;GO:0019901//protein kinase binding;GO:0032559	GO:0006351//transcription, DNA-dependent;GO:0006468//protein phosphorylation;GO:0006826//iron ion transport;GO:0006970//response to osmotic stress;GO:0009409//response to cold;GO:0009737//response to abscisic acid stimulus;GO:0009755//hormone-mediated signaling pathway;GO:0009845//seed germination;GO:0009888//tissue development;GO:0009908//flower development;GO:0010260//organ senescence;GO:001599…	gi|224131798|ref|XP_002321181.1|/0/histidine kinase cytokinin receptor [Populus trichocarpa]
clementine0.9_000676m.g	3727	6.74706	3.96085	8.46308	GO:0043231//intracellular membrane-bounded organelle	GO:0004386//helicase activity;GO:0032559;GO:0042623//ATPase activity, coupled	GO:0044260	gi|302143511|emb|CBI22072.3|/0/unnamed protein product [Vitis vinifera]
clementine0.9_000679m.g	4248	9.57718	26.4718	16.4209	GO:0016020//membrane;GO:0043231//intracellular membrane-bounded organelle	-	-	gi|297745622|emb|CBI40787.3|/1.38164e-130/unnamed protein product [Vitis vinifera]//gi|297745622|emb|CBI40787.3|/2.4157e-146/unnamed protein product [Vitis vinifera]
clementine0.9_000687m.g	4571	40.7452	80.0728	37.3331	-	-	GO:0010467//gene expression;GO:0044260	gi|296086085|emb|CBI31526.3|/0/unnamed protein product [Vitis vinifera]
clementine0.9_000688m.g	4022	56.473	18.6216	31.9726	GO:0044464//cell part	-	-	gi|297845134|ref|XP_002890448.1|/0/calcium-binding EF hand family protein [Arabidopsis lyrata subsp. lyrata]
clementine0.9_000700m.g	4957	23.7972	2.32111	8.36177	-	-	-	gi|296086263|emb|CBI31704.3|/0/unnamed protein product [Vitis vinifera]
clementine0.9_000702m.g	3944	3.42118	0.605473	1.69177	GO:0031224//intrinsic to membrane;GO:0043231//intracellular membrane-bounded organelle	GO:0015405;GO:0017111//nucleoside-triphosphatase activity;GO:0032559	GO:0006810//transport;GO:0009207	gi|6671365|gb|AAF23176.1|AF216497_1/0/P-glycoprotein [Gossypium hirsutum]
clementine0.9_000703m.g	3999	6.44152	2.17144	2.1741	-	-	-	gi|359495024|ref|XP_002267933.2|/0/PREDICTED: putative disease resistance protein At3g14460-like [Vitis vinifera]
clementine0.9_000706m.g	4161	7.27165	8.39976	15.2093	-	-	-	gi|302143215|emb|CBI20510.3|/0/unnamed protein product [Vitis vinifera]
clementine0.9_000709m.g	4062	5.18402	1.92398	2.19016	-	-	-	gi|224111296|ref|XP_002332952.1|/0/cc-nbs-lrr resistance protein [Populus trichocarpa]
clementine0.9_000712m.g	3929	2.23746	0.607784	1.18361	-	-	-	gi|302141826|emb|CBI19029.3|/0/unnamed protein product [Vitis vinifera]
clementine0.9_000719m.g	4996	5.07421	1.39049	3.60189	-	-	-	gi|225436452|ref|XP_002272611.1|/0/PREDICTED: uncharacterized protein LOC100267175 [Vitis vinifera]
clementine0.9_000724m.g	3959	2.01395	0.329007	1.37893	GO:0016020//membrane	GO:0000166//nucleotide binding;GO:0016779//nucleotidyltransferase activity	-	gi|255562516|ref|XP_002522264.1|/0/replication factor C / DNA polymerase III gamma-tau subunit, putative [Ricinus communis]
clementine0.9_000726m.g	4049	9.74493	4.8254	4.29451	GO:0000790//nuclear chromatin;GO:0044451//nucleoplasm part;GO:0055029	GO:0001882//nucleoside binding;GO:0003676//nucleic acid binding;GO:0034062//RNA polymerase activity	GO:0006305;GO:0016246//RNA interference	gi|255548744|ref|XP_002515428.1|/0/DNA-directed RNA polymerase subunit, putative [Ricinus communis]
clementine0.9_000727m.g	3930	11.2885	4.58484	16.875	-	-	GO:0009908//flower development;GO:0048513//organ development;GO:0051093//negative regulation of developmental process;GO:2000026//regulation of multicellular organismal development	gi|297737941|emb|CBI27142.3|/0/unnamed protein product [Vitis vinifera]
clementine0.9_000728m.g	6317	10.2917	2.85237	4.70511	-	-	-	gi|147861747|emb|CAN81071.1|/0/hypothetical protein VITISV_001976 [Vitis vinifera]
clementine0.9_000729m.g	4634	11.2941	2.29551	4.71228	GO:0044464//cell part	GO:0003723//RNA binding;GO:0032559;GO:0042623//ATPase activity, coupled	-	gi|297734269|emb|CBI15516.3|/0/unnamed protein product [Vitis vinifera]//gi|359491476|ref|XP_002277625.2|/0/PREDICTED: probable ATP-dependent RNA helicase DHX36-like [Vitis vinifera]
clementine0.9_000730m.g	4026	6.55066	11.701	16.8744	GO:0043231//intracellular membrane-bounded organelle	GO:0005488//binding;GO:0034062//RNA polymerase activity	GO:0002252;GO:0008037//cell recognition;GO:0030422//production of siRNA involved in RNA interference;GO:0035195//gene silencing by miRNA;GO:0045087//innate immune response;GO:0048437//floral organ development;GO:0048438//floral whorl development;GO:0048827//phyllome development	gi|255548928|ref|XP_002515520.1|/0/RNA-dependent RNA polymerase, putative [Ricinus communis]
clementine0.9_000738m.g	4057	6.09747	2.35443	3.4388	-	-	GO:0044249//cellular biosynthetic process;GO:0050896//response to stimulus	gi|225461373|ref|XP_002282015.1|/0/PREDICTED: uncharacterized protein LOC100252162 [Vitis vinifera]
clementine0.9_000739m.g	4108	19.0606	12.2602	25.1509	GO:0031224//intrinsic to membrane;GO:0043231//intracellular membrane-bounded organelle	GO:0019829//cation-transporting ATPase activity;GO:0032559	GO:0001709//cell fate determination;GO:0006811//ion transport;GO:0009206;GO:0009207;GO:0009267//cellular response to starvation;GO:0009555//pollen development;GO:0009856//pollination;GO:0030003//cellular cation homeostasis	gi|255544367|ref|XP_002513245.1|/0/cation-transporting atpase 13a1, putative [Ricinus communis]
clementine0.9_000741m.g	3576	9.26161	6.67781	13.4568	-	GO:0000166//nucleotide binding	-	gi|357473083|ref|XP_003606826.1|/0/Ribosome biogenesis protein BMS1-like protein [Medicago truncatula]
clementine0.9_000742m.g	4166	23.3591	4.89832	11.3084	GO:0031090//organelle membrane	-	-	gi|297742482|emb|CBI34631.3|/0/unnamed protein product [Vitis vinifera]
clementine0.9_000743m.g	4020	12.358	7.61433	16.5978	GO:0009532//plastid stroma	GO:0004086//carbamoyl-phosphate synthase activity;GO:0032559	GO:0006525//arginine metabolic process;GO:0009267//cellular response to starvation	gi|255570773|ref|XP_002526339.1|/0/ATP binding protein, putative [Ricinus communis]
clementine0.9_000746m.g	6042	40.3672	20.2646	40.6592	-	-	-	gi|255551447|ref|XP_002516769.1|/0/ATP binding protein, putative [Ricinus communis]
clementine0.9_000747m.g	4838	4.73283	2.01923	7.73159	GO:0009526//plastid envelope;GO:0031224//intrinsic to membrane	GO:0005515//protein binding;GO:0005548//phospholipid transporter activity;GO:0032559;GO:0042625//ATPase activity, coupled to transmembrane movement of ions;GO:0046872//metal ion binding	GO:0006869//lipid transport;GO:0009206	gi|224121336|ref|XP_002318557.1|/0/aminophospholipid ATPase [Populus trichocarpa]
clementine0.9_000750m.g	3947	22.1172	4.56509	5.83984	GO:0031224//intrinsic to membrane;GO:0032991//macromolecular complex;GO:0043231//intracellular membrane-bounded organelle	GO:0004702//receptor signaling protein serine/threonine kinase activity;GO:0008289//lipid binding;GO:0016791//phosphatase activity;GO:0032559;GO:0042802//identical protein binding;GO:0046983//protein dimerization activity	GO:0006464//protein modification process;GO:0009411//response to UV;GO:0009720//detection of hormone stimulus;GO:0009908//flower development;GO:0010208//pollen wall assembly;GO:0043401//steroid hormone mediated signaling pathway;GO:0048827//phyllome development;GO:0048878//chemical homeostasis	gi|395335476|gb|AFN54649.1|/0/brassinosteroid receptor [Fragaria x ananassa]
clementine0.9_000753m.g	4093	34.315	18.5107	37.3953	GO:0016020//membrane;GO:0043231//intracellular membrane-bounded organelle;GO:0044444//cytoplasmic part	-	-	gi|296082554|emb|CBI21559.3|/0/unnamed protein product [Vitis vinifera]
clementine0.9_000756m.g	3558	11.4345	0.610145	2.78454	GO:0016020//membrane;GO:0044444//cytoplasmic part	GO:0004674//protein serine/threonine kinase activity;GO:0032559	GO:0000902//cell morphogenesis;GO:0006464//protein modification process	gi|255539727|ref|XP_002510928.1|/0/kinase, putative [Ricinus communis]
clementine0.9_000762m.g	4252	15.7707	5.05453	7.98876	GO:0016020//membrane;GO:0044444//cytoplasmic part	GO:0004672//protein kinase activity;GO:0032559	GO:0006464//protein modification process	gi|374095601|gb|AEY85028.1|/0/putative ATP-binding protein [Camellia sinensis]
clementine0.9_000765m.g	4553	13.7402	6.10311	15.5874	GO:0043231//intracellular membrane-bounded organelle;GO:0044444//cytoplasmic part	GO:0004672//protein kinase activity	-	gi|255544602|ref|XP_002513362.1|/0/serine/threonine protein kinase, putative [Ricinus communis]//gi|255544604|ref|XP_002513363.1|/0/serine/threonine protein kinase, putative [Ricinus communis]
clementine0.9_000766m.g	3999	3.01627	1.30286	2.88195	-	GO:0046914//transition metal ion binding	GO:0003006//developmental process involved in reproduction;GO:0009267//cellular response to starvation	gi|255586065|ref|XP_002533697.1|/0/zinc finger protein, putative [Ricinus communis]
clementine0.9_000769m.g	3773	7.8027	0.632914	2.25074	-	-	-	gi|359493267|ref|XP_002271591.2|/0/PREDICTED: TMV resistance protein N-like [Vitis vinifera]
clementine0.9_000770m.g	3534	29.2142	9.95147	25.3455	GO:0000793//condensed chromosome;GO:0043231//intracellular membrane-bounded organelle	GO:0032559	GO:0006996//organelle organization;GO:0007059//chromosome segregation	gi|255577566|ref|XP_002529661.1|/0/Structural maintenance of chromosome, putative [Ricinus communis]
clementine0.9_000773m.g	4148	4.0908	5.80929	9.55389	GO:0009532//plastid stroma;GO:0030529//ribonucleoprotein complex	GO:0004386//helicase activity;GO:0032559;GO:0042623//ATPase activity, coupled	GO:0003006//developmental process involved in reproduction;GO:0010496//intercellular transport;GO:0010608//posttranscriptional regulation of gene expression	gi|296086480|emb|CBI32069.3|/0/unnamed protein product [Vitis vinifera]
clementine0.9_000775m.g	3979	10.3788	4.69206	5.99613	-	-	-	gi|225443802|ref|XP_002266486.1|/0/PREDICTED: protein SCAR3-like [Vitis vinifera]//gi|357518953|ref|XP_003629765.1|/8.462e-178/SCAR-like protein [Medicago truncatula]
clementine0.9_000778m.g	3600	8.80234	3.97997	3.08904	-	-	-	gi|296087869|emb|CBI35152.3|/2.39758e-131/unnamed protein product [Vitis vinifera]
clementine0.9_000780m.g	3946	3.41945	1.54042	2.66446	-	-	-	gi|297736928|emb|CBI26129.3|/0/unnamed protein product [Vitis vinifera]
clementine0.9_000781m.g	3783	16.7531	8.26352	13.6291	GO:0015629//actin cytoskeleton;GO:0016020//membrane;GO:0044444//cytoplasmic part	GO:0017111//nucleoside-triphosphatase activity;GO:0032559	GO:0030029//actin filament-based process	gi|255565536|ref|XP_002523758.1|/0/myosin vIII, putative [Ricinus communis]
clementine0.9_000782m.g	4076	9.07849	4.8467	12.9966	GO:0043231//intracellular membrane-bounded organelle	GO:0015924;GO:0046914//transition metal ion binding	GO:0006486//protein glycosylation;GO:0019318//hexose metabolic process	gi|255552750|ref|XP_002517418.1|/0/mannosidase alpha class 2a, putative [Ricinus communis]
clementine0.9_000785m.g	4777	22.2117	2.63579	3.51306	GO:0016020//membrane	-	GO:0010101	gi|359483669|ref|XP_002274947.2|/0/PREDICTED: uncharacterized protein LOC100253161 [Vitis vinifera]
clementine0.9_000792m.g	4848	19.3562	40.7043	93.1716	GO:0031981//nuclear lumen	GO:0005488//binding	GO:0000302//response to reactive oxygen species;GO:0006351//transcription, DNA-dependent;GO:0007623//circadian rhythm;GO:0009266//response to temperature stimulus;GO:0009639//response to red or far red light;GO:0048582	gi|224085197|ref|XP_002307516.1|/0/predicted protein [Populus trichocarpa]//gi|255566714|ref|XP_002524341.1|/0/Protein GIGANTEA, putative [Ricinus communis]
clementine0.9_000793m.g	4556	5.92324	0.952983	2.39648	-	GO:0046872//metal ion binding	-	gi|255562792|ref|XP_002522401.1|/0/Ran GTPase binding protein, putative [Ricinus communis]
clementine0.9_000794m.g	4128	6.28975	1.63027	5.38786	GO:0009536//plastid;GO:0043232	GO:0003676//nucleic acid binding;GO:0004527//exonuclease activity;GO:0034061	GO:0006259//DNA metabolic process	gi|302142870|emb|CBI20165.3|/0/unnamed protein product [Vitis vinifera]//gi|76880152|dbj|BAE45851.1|/0/DNA polymerase [Nicotiana tabacum]
clementine0.9_000796m.g	4648	42.5773	49.6952	17.7918	-	GO:0032559;GO:0042623//ATPase activity, coupled	-	gi|255578793|ref|XP_002530253.1|/0/dead box ATP-dependent RNA helicase, putative [Ricinus communis]
clementine0.9_000799m.g	3996	3.22318	0.32596	1.11317	-	-	-	gi|255537413|ref|XP_002509773.1|/0/ATP binding protein, putative [Ricinus communis]
clementine0.9_000801m.g	3480	1.87992	0.436674	1.80113	-	-	-	gi|224127917|ref|XP_002329209.1|/0/tir-nbs-lrr resistance protein [Populus trichocarpa]
clementine0.9_000806m.g	3882	2.6332	1.73358	6.19804	GO:0043231//intracellular membrane-bounded organelle	GO:0003916//DNA topoisomerase activity	GO:0006261//DNA-dependent DNA replication	gi|255574175|ref|XP_002528003.1|/0/prokaryotic DNA topoisomerase, putative [Ricinus communis]
clementine0.9_000808m.g	3858	20.4547	7.54017	13.6262	-	GO:0005488//binding	-	gi|302142208|emb|CBI19411.3|/0/unnamed protein product [Vitis vinifera]
clementine0.9_000810m.g	4135	7.31737	3.78003	11.7843	-	GO:0003677//DNA binding	GO:0006351//transcription, DNA-dependent	gi|297736146|emb|CBI24184.3|/0/unnamed protein product [Vitis vinifera]
clementine0.9_000811m.g	3917	19.6247	8.25794	10.6335	-	-	-	gi|255545606|ref|XP_002513863.1|/0/ATP binding protein, putative [Ricinus communis]
clementine0.9_000816m.g	3830	16.0137	6.0649	9.50248	-	-	-	gi|255551695|ref|XP_002516893.1|/0/always early, putative [Ricinus communis]
clementine0.9_000817m.g	3739	5.2491	1.74183	2.0549	-	-	-	gi|255585368|ref|XP_002533380.1|/0/conserved hypothetical protein [Ricinus communis]
clementine0.9_000819m.g	4000	10.3754	5.21015	12.0304	GO:0043231//intracellular membrane-bounded organelle	GO:0001071//nucleic acid binding transcription factor activity;GO:0001882//nucleoside binding;GO:0003676//nucleic acid binding;GO:0034062//RNA polymerase activity	GO:0006351//transcription, DNA-dependent	gi|255569145|ref|XP_002525541.1|/0/DNA-directed RNA polymerase III subunit, putative [Ricinus communis]
clementine0.9_000823m.g	4033	16.9819	7.8051	13.7368	-	GO:0016790//thiolester hydrolase activity	GO:0009791//post-embryonic development;GO:0019941//modification-dependent protein catabolic process;GO:0048827//phyllome development	gi|147776521|emb|CAN74012.1|/0/hypothetical protein VITISV_003549 [Vitis vinifera]
clementine0.9_000826m.g	4128	13.3224	6.5211	8.08179	-	-	-	gi|297733763|emb|CBI15010.3|/0/unnamed protein product [Vitis vinifera]
clementine0.9_000827m.g	4253	59.5587	3.01159	10.3639	GO:0044444//cytoplasmic part	GO:0030528//transcription regulator activity;GO:0031072//heat shock protein binding;GO:0042802//identical protein binding	GO:0003002//regionalization;GO:0003006//developmental process involved in reproduction;GO:0007165//signal transduction;GO:0009725//response to hormone stimulus	gi|24461849|gb|AAN62336.1|AF506028_3/0/CTV.2 [Citrus trifoliata]
clementine0.9_000830m.g	4099	5.88536	2.59512	6.16588	-	GO:0004672//protein kinase activity	-	gi|255552033|ref|XP_002517061.1|/0/ATP binding protein, putative [Ricinus communis]
clementine0.9_000833m.g	4201	14.8915	4.65081	6.11243	-	-	-	gi|225444822|ref|XP_002279012.1|/0/PREDICTED: uncharacterized protein LOC100249046 [Vitis vinifera]
clementine0.9_000837m.g	4221	26.3967	16.0464	41.5305	GO:0012507//ER to Golgi transport vesicle membrane	GO:0046914//transition metal ion binding	GO:0006950//response to stress;GO:0015031//protein transport;GO:0048193//Golgi vesicle transport	gi|255542372|ref|XP_002512249.1|/0/Protein transport protein Sec24C, putative [Ricinus communis]
clementine0.9_000838m.g	4163	4.76359	1.04295	2.18559	GO:0009536//plastid	GO:0003690//double-stranded DNA binding;GO:0016788//hydrolase activity, acting on ester bonds;GO:0032559	GO:0000002//mitochondrial genome maintenance;GO:0006281//DNA repair	gi|255574867|ref|XP_002528340.1|/0/ATP binding protein, putative [Ricinus communis]//gi|296083740|emb|CBI23729.3|/0/unnamed protein product [Vitis vinifera]
clementine0.9_000839m.g	4176	8.1757	2.59925	5.76169	GO:0044464//cell part	GO:0004673//protein histidine kinase activity;GO:0004930//G-protein coupled receptor activity;GO:0032559;GO:0042802//identical protein binding	GO:0006351//transcription, DNA-dependent;GO:0006468//protein phosphorylation;GO:0007602//phototransduction	gi|189409278|gb|ACC60970.1|/0/phytochrome B [Vitis riparia]
clementine0.9_000844m.g	3541	2.77131	0.122615	0.856502	GO:0031224//intrinsic to membrane;GO:0031410//cytoplasmic vesicle	GO:0004674//protein serine/threonine kinase activity;GO:0005515//protein binding;GO:0016628//oxidoreductase activity, acting on the CH-CH group of donors, NAD or NADP as acceptor;GO:0032559	GO:0006464//protein modification process;GO:0007167//enzyme linked receptor protein signaling pathway;GO:0010051//xylem and phloem pattern formation;GO:0010232//vascular transport;GO:0043401//steroid hormone mediated signaling pathway	gi|255561787|ref|XP_002521903.1|/0/serine/threonine-protein kinase bri1, putative [Ricinus communis]
clementine0.9_000849m.g	3638	9.32856	1.9692	1.72291	-	-	-	gi|147858727|emb|CAN82909.1|/0/hypothetical protein VITISV_025072 [Vitis vinifera]
clementine0.9_000850m.g	4398	20.7788	4.44249	5.14904	GO:0043231//intracellular membrane-bounded organelle	GO:0001071//nucleic acid binding transcription factor activity;GO:0003676//nucleic acid binding;GO:0005515//protein binding;GO:0030528//transcription regulator activity	GO:0006351//transcription, DNA-dependent;GO:0009606//tropism;GO:0009755//hormone-mediated signaling pathway;GO:0030522//intracellular receptor mediated signaling pathway;GO:0048527//lateral root development;GO:0048827//phyllome development	gi|255550359|ref|XP_002516230.1|/0/Auxin response factor, putative [Ricinus communis]
clementine0.9_000858m.g	4180	77.9617	35.4199	36.4235	-	GO:0019901//protein kinase binding	-	gi|224102177|ref|XP_002312577.1|/0/predicted protein [Populus trichocarpa]
clementine0.9_000861m.g	3504	1.51697	0.805412	0.288515	-	-	-	gi|224144591|ref|XP_002325342.1|/3.88694e-86/predicted protein [Populus trichocarpa]
clementine0.9_000864m.g	4808	16.9234	4.33457	3.44836	-	GO:0005488//binding;GO:0034062//RNA polymerase activity	GO:0010033//response to organic substance;GO:0010608//posttranscriptional regulation of gene expression;GO:0048522;GO:0051707//response to other organism	gi|224099571|ref|XP_002311536.1|/0/rna-dependent RNA polymerase [Populus trichocarpa]
clementine0.9_000866m.g	3845	3.61561	1.41151	1.78791	-	-	-	gi|255539987|ref|XP_002511058.1|/0/tyrosyl-DNA phosphodiesterase, putative [Ricinus communis]
clementine0.9_000868m.g	3526	13.5676	4.43291	4.5301	GO:0031981//nuclear lumen	GO:0005488//binding;GO:0034062//RNA polymerase activity	GO:0007154//cell communication;GO:0010033//response to organic substance;GO:0016246//RNA interference	gi|224133496|ref|XP_002321582.1|/0/rna-dependent RNA polymerase [Populus trichocarpa]
clementine0.9_000869m.g	3840	44.8281	9.8934	18.3236	GO:0044464//cell part	GO:0005488//binding	GO:0003006//developmental process involved in reproduction	gi|255542820|ref|XP_002512473.1|/0/WD-repeat protein, putative [Ricinus communis]
clementine0.9_000875m.g	5487	26.0815	9.0998	20.1197	-	-	-	gi|302143809|emb|CBI22670.3|/1.03307e-129/unnamed protein product [Vitis vinifera]//gi|302143809|emb|CBI22670.3|/1.11861e-129/unnamed protein product [Vitis vinifera]//gi|302143809|emb|CBI22670.3|/1.20795e-129/unnamed protein product [Vitis vinifera]//gi|302143809|emb|CBI22670.3|/9.42618e-130/unnamed protein product [Vitis vinifera]
clementine0.9_000880m.g	3581	7.99269	3.33424	6.21086	GO:0043231//intracellular membrane-bounded organelle	-	GO:0009640//photomorphogenesis	gi|296081406|emb|CBI16839.3|/2.3929e-115/unnamed protein product [Vitis vinifera]
clementine0.9_000882m.g	3384	7.00804	3.07928	7.94666	GO:0031224//intrinsic to membrane	GO:0005548//phospholipid transporter activity;GO:0032559;GO:0042625//ATPase activity, coupled to transmembrane movement of ions;GO:0046872//metal ion binding	GO:0006869//lipid transport;GO:0009206	gi|302143322|emb|CBI21883.3|/0/unnamed protein product [Vitis vinifera]
clementine0.9_000883m.g	3742	11.3093	2.61064	3.29601	-	-	-	gi|225460354|ref|XP_002263146.1|/0/PREDICTED: TMV resistance protein N-like [Vitis vinifera]//gi|359496026|ref|XP_002277166.2|/0/PREDICTED: TMV resistance protein N-like [Vitis vinifera]
clementine0.9_000886m.g	3375	3.27106	1.67239	1.25808	-	GO:0016853//isomerase activity;GO:0032559	-	gi|255566040|ref|XP_002524008.1|/0/AMP dependent ligase, putative [Ricinus communis]
clementine0.9_000887m.g	3843	13.3528	10.5636	21.5713	-	-	-	gi|297745353|emb|CBI40433.3|/0/unnamed protein product [Vitis vinifera]
clementine0.9_000892m.g	3730	45.8212	14.201	27.4287	GO:0044464//cell part	GO:0046914//transition metal ion binding	-	gi|297741251|emb|CBI32382.3|/0/unnamed protein product [Vitis vinifera]
clementine0.9_000896m.g	3928	5.6211	1.27115	2.4193	GO:0043231//intracellular membrane-bounded organelle	GO:0019001//guanyl nucleotide binding	GO:0007165//signal transduction;GO:0009725//response to hormone stimulus;GO:0009746;GO:0010015//root morphogenesis;GO:0034285	gi|255556179|ref|XP_002519124.1|/0/GTP-binding protein alpha subunit, gna, putative [Ricinus communis]
clementine0.9_000899m.g	3944	33.0714	5.5043	6.7158	-	-	-	gi|297736652|emb|CBI25523.3|/0/unnamed protein product [Vitis vinifera]
clementine0.9_000901m.g	3446	2.55107	0.566978	1.93625	-	-	-	gi|224130518|ref|XP_002328629.1|/0/tir-nbs-lrr resistance protein [Populus trichocarpa]//gi|255582274|ref|XP_002531928.1|/0/leucine-rich repeat-containing protein, putative [Ricinus communis]
clementine0.9_000905m.g	3363	0.607914	1.4847	3.30673	-	GO:0004620//phospholipase activity;GO:0016628//oxidoreductase activity, acting on the CH-CH group of donors, NAD or NADP as acceptor	GO:0008152//metabolic process;GO:0009267//cellular response to starvation;GO:0048513//organ development	gi|255542814|ref|XP_002512470.1|/0/phospholipase d zeta, putative [Ricinus communis]
clementine0.9_000907m.g	4088	8.80179	4.35454	8.55654	GO:0030529//ribonucleoprotein complex;GO:0043231//intracellular membrane-bounded organelle;GO:0044444//cytoplasmic part	GO:0042802//identical protein binding	GO:0009887//organ morphogenesis;GO:0031086//nuclear-transcribed mRNA catabolic process, deadenylation-independent decay	gi|357460315|ref|XP_003600439.1|/0/Enhancer of mRNA-decapping protein [Medicago truncatula]
clementine0.9_000918m.g	3909	2.30121	0.333215	0.0517246	GO:0031224//intrinsic to membrane;GO:0031410//cytoplasmic vesicle	GO:0004672//protein kinase activity;GO:0004871//signal transducer activity;GO:0016628//oxidoreductase activity, acting on the CH-CH group of donors, NAD or NADP as acceptor;GO:0032559	GO:0006464//protein modification process	gi|255540579|ref|XP_002511354.1|/0/receptor protein kinase, putative [Ricinus communis]
clementine0.9_000919m.g	4223	3.14674	1.07954	0.335151	-	-	-	gi|115449999|ref|NP_001048603.1|/0/Os02g0828900 [Oryza sativa Japonica Group]
clementine0.9_000923m.g	3880	17.5461	3.63681	6.87868	-	GO:0005543//phospholipid binding;GO:0017016//Ras GTPase binding;GO:0046914//transition metal ion binding	GO:0023052//signaling	gi|255570334|ref|XP_002526126.1|/0/Ran GTPase binding protein, putative [Ricinus communis]
clementine0.9_000925m.g	3396	39.3712	12.8489	31.7338	GO:0030076//light-harvesting complex;GO:0030312//external encapsulating structure	GO:0003824//catalytic activity;GO:0022892	GO:0003006//developmental process involved in reproduction;GO:0015031//protein transport	gi|357518889|ref|XP_003629733.1|/0/Ran-binding protein [Medicago truncatula]
clementine0.9_000927m.g	3809	14.3308	8.15012	17.0395	-	-	-	gi|255565513|ref|XP_002523747.1|/0/conserved hypothetical protein [Ricinus communis]
clementine0.9_000929m.g	3986	28.3633	8.87747	11.9205	-	-	-	gi|297742566|emb|CBI34715.3|/3.60374e-56/unnamed protein product [Vitis vinifera]//gi|297742566|emb|CBI34715.3|/3.67798e-56/unnamed protein product [Vitis vinifera]//gi|297742566|emb|CBI34715.3|/3.68726e-56/unnamed protein product [Vitis vinifera]//gi|297742566|emb|CBI34715.3|/8.65536e-55/unnamed protein product [Vitis vinifera]
clementine0.9_000931m.g	3832	28.0627	8.61107	16.6207	GO:0031461//cullin-RING ubiquitin ligase complex;GO:0043231//intracellular membrane-bounded organelle	GO:0004518//nuclease activity;GO:0046030//inositol trisphosphate phosphatase activity	GO:0006950//response to stress;GO:0009416//response to light stimulus;GO:0009725//response to hormone stimulus;GO:0009756//carbohydrate mediated signaling;GO:0009888//tissue development;GO:0031667//response to nutrient levels;GO:0048513//organ development;GO:0048878//chemical homeostasis	gi|296083403|emb|CBI23358.3|/0/unnamed protein product [Vitis vinifera]
clementine0.9_000935m.g	4312	5.35758	2.06416	1.92251	-	-	-	gi|225456583|ref|XP_002265665.1|/0/PREDICTED: uncharacterized protein LOC100253543 [Vitis vinifera]
clementine0.9_000941m.g	3768	23.2764	11.0043	11.6443	GO:0016020//membrane;GO:0043231//intracellular membrane-bounded organelle	GO:0018024//histone-lysine N-methyltransferase activity;GO:0035091//phosphatidylinositol binding;GO:0043565//sequence-specific DNA binding;GO:0046872//metal ion binding	GO:0006351//transcription, DNA-dependent;GO:0009908//flower development;GO:0034968//histone lysine methylation;GO:0050789//regulation of biological process	gi|255573673|ref|XP_002527758.1|/0/phd finger protein, putative [Ricinus communis]
clementine0.9_000945m.g	5002	26.5259	7.6819	13.8244	-	-	-	gi|297734346|emb|CBI15593.3|/0/unnamed protein product [Vitis vinifera]//gi|359491520|ref|XP_002278916.2|/0/PREDICTED: uncharacterized protein LOC100250985 [Vitis vinifera]
clementine0.9_000949m.g	3740	0.163991	0.522408	1.83811	-	GO:0005543//phospholipid binding;GO:0017016//Ras GTPase binding;GO:0046872//metal ion binding	GO:0023052//signaling	gi|255585556|ref|XP_002533468.1|/0/Ran GTPase binding protein, putative [Ricinus communis]
clementine0.9_000954m.g	3896	5.35242	5.62783	11.7807	GO:0016020//membrane	-	-	gi|296083169|emb|CBI22805.3|/0/unnamed protein product [Vitis vinifera]
clementine0.9_000956m.g	4186	14.5053	5.28981	9.22566	GO:0016020//membrane	GO:0017016//Ras GTPase binding;GO:0046914//transition metal ion binding	-	gi|255572207|ref|XP_002527043.1|/0/Ran GTPase binding protein, putative [Ricinus communis]
clementine0.9_000959m.g	3415	6.34577	1.58924	1.36176	-	GO:0004673//protein histidine kinase activity;GO:0004888//transmembrane receptor activity;GO:0005488//binding	GO:0006950//response to stress;GO:0007165//signal transduction;GO:0016310//phosphorylation;GO:0044238//primary metabolic process;GO:0044260;GO:0048316//seed development	gi|255577536|ref|XP_002529646.1|/0/histidine kinase 1 plant, putative [Ricinus communis]
clementine0.9_000961m.g	3688	12.4727	9.59479	32.9493	-	GO:0005488//binding	-	gi|357441687|ref|XP_003591121.1|/0/Lin-9-like protein [Medicago truncatula]
clementine0.9_000967m.g	4330	11.7566	4.7128	9.24571	-	GO:0004672//protein kinase activity;GO:0004721//phosphoprotein phosphatase activity;GO:0032559	GO:0006464//protein modification process	gi|296084483|emb|CBI25042.3|/0/unnamed protein product [Vitis vinifera]
clementine0.9_000969m.g	3643	2.357	0.536318	0.888022	GO:0015630//microtubule cytoskeleton	GO:0003774//motor activity;GO:0032559;GO:0046914//transition metal ion binding	GO:0007017//microtubule-based process	gi|297744752|emb|CBI38014.3|/0/unnamed protein product [Vitis vinifera]
clementine0.9_000972m.g	3306	1.79335	0.393992	0.61159	-	-	-	gi|224111284|ref|XP_002332949.1|/0/cc-nbs-lrr resistance protein [Populus trichocarpa]
clementine0.9_000973m.g	3769	8.13644	3.68632	3.70157	-	GO:0000166//nucleotide binding	-	gi|357473083|ref|XP_003606826.1|/0/Ribosome biogenesis protein BMS1-like protein [Medicago truncatula]
clementine0.9_000975m.g	3306	8.22466	1.44464	8.99037	-	GO:0004518//nuclease activity	-	gi|255545438|ref|XP_002513779.1|/0/RNA binding protein, putative [Ricinus communis]
clementine0.9_000976m.g	3602	6.75417	11.6922	15.605	-	GO:0004620//phospholipase activity;GO:0016628//oxidoreductase activity, acting on the CH-CH group of donors, NAD or NADP as acceptor	GO:0008152//metabolic process;GO:0009267//cellular response to starvation;GO:0048513//organ development	gi|255551857|ref|XP_002516974.1|/0/phospholipase d zeta, putative [Ricinus communis]
clementine0.9_000977m.g	3735	4.26946	0.058123	0.162403	GO:0016020//membrane	-	-	gi|225452142|ref|XP_002270234.1|/0/PREDICTED: uncharacterized protein LOC100266440 [Vitis vinifera]
clementine0.9_000984m.g	4106	83.7981	5.60436	9.01146	-	GO:0005488//binding	GO:0009725//response to hormone stimulus;GO:0050794//regulation of cellular process	gi|255557566|ref|XP_002519813.1|/0/Auxin response factor, putative [Ricinus communis]
clementine0.9_000986m.g	3818	3.74827	3.29785	7.41404	GO:0009536//plastid	GO:0004812//aminoacyl-tRNA ligase activity;GO:0032559;GO:0046914//transition metal ion binding	GO:0003006//developmental process involved in reproduction;GO:0006418//tRNA aminoacylation for protein translation	gi|255551751|ref|XP_002516921.1|/0/isoleucyl tRNA synthetase, putative [Ricinus communis]
clementine0.9_000991m.g	5006	2.287	1.21424	0.727017	-	GO:0003676//nucleic acid binding	GO:0006351//transcription, DNA-dependent	gi|297737170|emb|CBI26371.3|/2.64528e-155/unnamed protein product [Vitis vinifera]//gi|297737170|emb|CBI26371.3|/3.4953e-155/unnamed protein product [Vitis vinifera]//gi|297737170|emb|CBI26371.3|/3.53531e-155/unnamed protein product [Vitis vinifera]
clementine0.9_000992m.g	3917	6.00224	0.665069	1.29047	-	-	-	gi|297745889|emb|CBI15945.3|/0/unnamed protein product [Vitis vinifera]
clementine0.9_000998m.g	3740	23.068	10.6803	18.327	GO:0043231//intracellular membrane-bounded organelle	GO:0005515//protein binding;GO:0016772//transferase activity, transferring phosphorus-containing groups	GO:0050896//response to stimulus	gi|297742873|emb|CBI35638.3|/0/unnamed protein product [Vitis vinifera]
clementine0.9_000999m.g	3616	14.0214	1.56093	0.782821	-	GO:0017016//Ras GTPase binding;GO:0046914//transition metal ion binding	-	gi|255572207|ref|XP_002527043.1|/0/Ran GTPase binding protein, putative [Ricinus communis]
clementine0.9_001002m.g	4246	4.52602	2.86317	9.381	GO:0043231//intracellular membrane-bounded organelle;GO:0043234//protein complex	GO:0005515//protein binding;GO:0016301//kinase activity;GO:0016491//oxidoreductase activity;GO:0032559	GO:0006464//protein modification process;GO:0007602//phototransduction;GO:0009640//photomorphogenesis;GO:0048572;GO:0048573//photoperiodism, flowering	gi|255537717|ref|XP_002509925.1|/0/ubiquitin ligase protein cop1, putative [Ricinus communis]
clementine0.9_001003m.g	4130	41.8288	6.62307	15.5683	GO:0031224//intrinsic to membrane;GO:0043231//intracellular membrane-bounded organelle;GO:0043234//protein complex	GO:0016759//cellulose synthase activity;GO:0046914//transition metal ion binding	GO:0003006//developmental process involved in reproduction;GO:0009250//glucan biosynthetic process;GO:0009832//plant-type cell wall biogenesis;GO:0030865//cortical cytoskeleton organization;GO:0040007//growth;GO:0045229//external encapsulating structure organization	gi|37725363|gb|AAO25581.1|/0/cellulose synthase [Populus tremuloides]
clementine0.9_001005m.g	3750	11.3942	3.12609	3.98991	GO:0043231//intracellular membrane-bounded organelle	GO:0003676//nucleic acid binding;GO:0004518//nuclease activity;GO:0034061;GO:0043169//cation binding	GO:0006259//DNA metabolic process	gi|115484523|ref|NP_001067405.1|/0/Os11g0186400 [Oryza sativa Japonica Group]//gi|225431691|ref|XP_002264385.1|/0/PREDICTED: DNA polymerase delta catalytic subunit [Vitis vinifera]
clementine0.9_001006m.g	3846	67.8282	6.09612	14.247	GO:0031224//intrinsic to membrane	GO:0016759//cellulose synthase activity;GO:0046914//transition metal ion binding	GO:0009250//glucan biosynthetic process;GO:0045229//external encapsulating structure organization	gi|224066625|ref|XP_002302169.1|/0/cellulose synthase [Populus trichocarpa]
clementine0.9_001007m.g	3634	4.10683	1.31425	2.05864	GO:0005635//nuclear envelope	GO:0022892	-	gi|255556524|ref|XP_002519296.1|/0/protein transporter, putative [Ricinus communis]
clementine0.9_001008m.g	3912	90.619	40.843	71.0668	GO:0009536//plastid	GO:0004812//aminoacyl-tRNA ligase activity;GO:0032559	GO:0006418//tRNA aminoacylation for protein translation	gi|255570956|ref|XP_002526429.1|/0/leucyl-tRNA synthetase, putative [Ricinus communis]
clementine0.9_001010m.g	4046	17.5842	1.98525	2.49866	-	-	-	gi|297735460|emb|CBI17900.3|/3.95942e-98/unnamed protein product [Vitis vinifera]
clementine0.9_001018m.g	3857	133.785	29.4931	64.7936	GO:0031224//intrinsic to membrane;GO:0043231//intracellular membrane-bounded organelle	GO:0016759//cellulose synthase activity;GO:0046914//transition metal ion binding	GO:0006972//hyperosmotic response;GO:0009250//glucan biosynthetic process;GO:0009832//plant-type cell wall biogenesis;GO:0045229//external encapsulating structure organization	gi|255548960|ref|XP_002515536.1|/0/Cellulose synthase A catalytic subunit 6 [UDP-forming], putative [Ricinus communis]
clementine0.9_001020m.g	3938	0.986386	0.0551268	0.564781	-	-	-	gi|255563546|ref|XP_002522775.1|/0/pentatricopeptide repeat-containing protein, putative [Ricinus communis]
clementine0.9_001024m.g	3834	3.46601	2.83111	5.74827	-	-	GO:0006351//transcription, DNA-dependent	gi|297734293|emb|CBI15540.3|/0/unnamed protein product [Vitis vinifera]//gi|297734293|emb|CBI15540.3|/4.34371e-175/unnamed protein product [Vitis vinifera]
clementine0.9_001026m.g	3731	15.8907	19.2012	45.3048	GO:0005576//extracellular region;GO:0009526//plastid envelope;GO:0009532//plastid stroma	GO:0004175//endopeptidase activity;GO:0046914//transition metal ion binding	GO:0006508//proteolysis;GO:0010038//response to metal ion	gi|297741302|emb|CBI32433.3|/0/unnamed protein product [Vitis vinifera]
clementine0.9_001031m.g	3782	22.8118	9.35632	13.205	-	-	-	gi|224112162|ref|XP_002316103.1|/0/predicted protein [Populus trichocarpa]
clementine0.9_001032m.g	3503	2.56792	0.681697	2.0779	GO:0009536//plastid	GO:0000166//nucleotide binding;GO:0016787//hydrolase activity	GO:0006952//defense response;GO:0009987//cellular process	gi|224121242|ref|XP_002318534.1|/0/tir-nbs-lrr resistance protein [Populus trichocarpa]
clementine0.9_001035m.g	3844	2.28694	0.001	0.001	GO:0044464//cell part	-	-	gi|14532612|gb|AAK64034.1|/0/unknown protein [Arabidopsis thaliana]
clementine0.9_001036m.g	4392	78.2482	27.6799	43.2281	GO:0031224//intrinsic to membrane	GO:0016759//cellulose synthase activity;GO:0046914//transition metal ion binding	GO:0009250//glucan biosynthetic process;GO:0045229//external encapsulating structure organization	gi|224055195|ref|XP_002298432.1|/0/cellulose synthase [Populus trichocarpa]
clementine0.9_001040m.g	3234	4.55157	2.41658	5.37677	GO:0031224//intrinsic to membrane;GO:0031410//cytoplasmic vesicle	GO:0016798//hydrolase activity, acting on glycosyl bonds	-	gi|296082524|emb|CBI21529.3|/0/unnamed protein product [Vitis vinifera]
clementine0.9_001042m.g	3234	1.32754	0.201382	1.56301	GO:0044424//intracellular part	GO:0005488//binding;GO:0034061	GO:0009411//response to UV;GO:0033554//cellular response to stress;GO:0044237//cellular metabolic process;GO:0044238//primary metabolic process	gi|296083109|emb|CBI22513.3|/0/unnamed protein product [Vitis vinifera]
clementine0.9_001046m.g	4284	24.8632	14.7463	33.5098	-	GO:0004672//protein kinase activity;GO:0032559	GO:0006464//protein modification process	gi|255570521|ref|XP_002526218.1|/0/serine/threonine protein kinase, putative [Ricinus communis]
clementine0.9_001048m.g	3716	22.4468	8.47093	15.3983	-	GO:0003676//nucleic acid binding;GO:0005515//protein binding	GO:0007275//multicellular organismal development	gi|356565167|ref|XP_003550816.1|/0/PREDICTED: uncharacterized protein LOC100783258 [Glycine max]
clementine0.9_001063m.g	3766	4.66861	3.28574	10.4156	GO:0009534//chloroplast thylakoid	GO:0000166//nucleotide binding;GO:0005515//protein binding;GO:0042623//ATPase activity, coupled	-	gi|255552465|ref|XP_002517276.1|/0/calmodulin-binding protein, putative [Ricinus communis]
clementine0.9_001064m.g	3783	5.07996	2.35281	2.83271	-	-	GO:0043488//regulation of mRNA stability	gi|255586885|ref|XP_002534048.1|/0/pentatricopeptide repeat-containing protein, putative [Ricinus communis]
clementine0.9_001067m.g	3578	4.17111	7.5235	17.405	GO:0015630//microtubule cytoskeleton	GO:0003774//motor activity;GO:0032559	GO:0007017//microtubule-based process	gi|255583233|ref|XP_002532381.1|/0/ATP binding protein, putative [Ricinus communis]
clementine0.9_001069m.g	3627	16.0645	5.74596	10.0343	GO:0009532//plastid stroma	GO:0004812//aminoacyl-tRNA ligase activity;GO:0032559	GO:0003006//developmental process involved in reproduction;GO:0006418//tRNA aminoacylation for protein translation;GO:2000026//regulation of multicellular organismal development	gi|255541030|ref|XP_002511579.1|/0/Glycyl-tRNA synthetase 2, chloroplast/mitochondrial precursor, putative [Ricinus communis]
clementine0.9_001075m.g	3265	4.57097	0.997348	3.28213	-	-	-	gi|297800018|ref|XP_002867893.1|/8.38442e-168/EMB1895 [Arabidopsis lyrata subsp. lyrata]
clementine0.9_001079m.g	3478	3.70322	3.74507	19.4169	GO:0031227//intrinsic to endoplasmic reticulum membrane	GO:0019829//cation-transporting ATPase activity;GO:0032559	GO:0000041//transition metal ion transport;GO:0009206;GO:0010038//response to metal ion;GO:0030003//cellular cation homeostasis;GO:0070838//divalent metal ion transport	gi|343915319|tpg|DAA34949.1|/0/TPA: TPA_exp: type IIA calcium ATPase [Medicago truncatula]
clementine0.9_001081m.g	3192	1.7293	2.51639	7.22113	GO:0016020//membrane;GO:0043231//intracellular membrane-bounded organelle	-	GO:0048856//anatomical structure development	gi|297807817|ref|XP_002871792.1|/0/C2 domain-containing protein [Arabidopsis lyrata subsp. lyrata]
clementine0.9_001082m.g	3192	1.66525	3.53655	5.89092	-	GO:0008080//N-acetyltransferase activity;GO:0008374//O-acyltransferase activity	GO:0044238//primary metabolic process	gi|297734865|emb|CBI17099.3|/0/unnamed protein product [Vitis vinifera]
clementine0.9_001084m.g	4359	7.55106	6.32493	12.7558	-	-	-	gi|15237322|ref|NP_197134.1|/0/Vps51/Vps67 family (components of vesicular transport) protein [Arabidopsis thaliana]
clementine0.9_001085m.g	3475	0.764817	0.001	0.174554	-	-	-	gi|224127726|ref|XP_002329162.1|/0/tir-nbs-lrr resistance protein [Populus trichocarpa]
clementine0.9_001087m.g	3483	4.93054	1.24657	0.928816	GO:0031224//intrinsic to membrane;GO:0031410//cytoplasmic vesicle	GO:0004672//protein kinase activity;GO:0016791//phosphatase activity;GO:0032559	GO:0006464//protein modification process;GO:0023052//signaling	gi|255564373|ref|XP_002523183.1|/0/protein binding protein, putative [Ricinus communis]
clementine0.9_001088m.g	3383	10.9382	3.27271	5.79739	-	-	-	gi|224130844|ref|XP_002328390.1|/3.05352e-88/predicted protein [Populus trichocarpa]
clementine0.9_001089m.g	3598	9.20498	3.01681	5.67575	GO:0043231//intracellular membrane-bounded organelle	GO:0003824//catalytic activity;GO:0032559;GO:0046914//transition metal ion binding	GO:0006886//intracellular protein transport	gi|302141769|emb|CBI18972.3|/0/unnamed protein product [Vitis vinifera]
clementine0.9_001092m.g	3461	17.0712	6.52335	6.48462	GO:0043231//intracellular membrane-bounded organelle;GO:0043232	GO:0032559	GO:0000725//recombinational repair;GO:0006996//organelle organization;GO:0007059//chromosome segregation;GO:0010212//response to ionizing radiation	gi|297744975|emb|CBI38567.3|/0/unnamed protein product [Vitis vinifera]
clementine0.9_001095m.g	3924	5.99153	2.87682	7.83209	-	-	-	gi|357446405|ref|XP_003593480.1|/0/Katanin p80 WD40-containing subunit B1 [Medicago truncatula]
clementine0.9_001096m.g	3601	31.1687	37.1964	75.8569	-	GO:0004611//phosphoenolpyruvate carboxykinase activity;GO:0046872//metal ion binding	GO:0009060//aerobic respiration;GO:0043648//dicarboxylic acid metabolic process;GO:0071704	gi|149789412|gb|ABR29877.1|/0/phosphoenolpyruvate carboxylase [Ricinus communis]
clementine0.9_001100m.g	4296	6.94797	2.02132	7.90693	GO:0005576//extracellular region	GO:0016791//phosphatase activity	GO:0009267//cellular response to starvation;GO:0044238//primary metabolic process	gi|302142328|emb|CBI19531.3|/1.98394e-180/unnamed protein product [Vitis vinifera]
clementine0.9_001105m.g	3737	7.22137	3.02078	2.43474	-	-	-	gi|296082210|emb|CBI21215.3|/0/unnamed protein product [Vitis vinifera]
clementine0.9_001106m.g	3277	3.68082	32.262	21.5334	-	GO:0035251//UDP-glucosyltransferase activity	GO:0005984//disaccharide metabolic process	gi|186397273|dbj|BAG30918.1|/0/sucrose phosphate synthase [Pyrus pyrifolia]
clementine0.9_001108m.g	3672	5.17785	1.1824	3.24872	GO:0009536//plastid;GO:0031224//intrinsic to membrane	GO:0004672//protein kinase activity;GO:0004872//receptor activity;GO:0016628//oxidoreductase activity, acting on the CH-CH group of donors, NAD or NADP as acceptor;GO:0016791//phosphatase activity;GO:0032559	GO:0006464//protein modification process;GO:0006950//response to stress;GO:0007167//enzyme linked receptor protein signaling pathway	gi|255574664|ref|XP_002528241.1|/0/Phytosulfokine receptor precursor, putative [Ricinus communis]
clementine0.9_001109m.g	3436	0.0594999	0.442266	1.41228	GO:0009536//plastid	GO:0003824//catalytic activity	-	gi|359483099|ref|XP_002262931.2|/0/PREDICTED: probable LRR receptor-like serine/threonine-protein kinase At4g36180-like [Vitis vinifera]
clementine0.9_001112m.g	3747	1.6914	0.695243	2.26636	GO:0031227//intrinsic to endoplasmic reticulum membrane	GO:0019829//cation-transporting ATPase activity;GO:0032559;GO:0043169//cation binding	GO:0009206;GO:0070838//divalent metal ion transport	gi|224127987|ref|XP_002320213.1|/0/endoplasmic reticulum [ER]-type calcium ATPase [Populus trichocarpa]
clementine0.9_001121m.g	3621	9.20297	4.43652	8.71082	GO:0031410//cytoplasmic vesicle	-	-	gi|224054162|ref|XP_002298122.1|/0/predicted protein [Populus trichocarpa]
clementine0.9_001122m.g	3852	18.2044	5.1849	13.9623	GO:0005635//nuclear envelope	GO:0022892	GO:0015031//protein transport	gi|225447959|ref|XP_002267673.1|/0/PREDICTED: probable importin subunit beta-4 [Vitis vinifera]
clementine0.9_001127m.g	3723	116.526	28.6887	27.6975	GO:0015630//microtubule cytoskeleton;GO:0016020//membrane	GO:0003774//motor activity;GO:0032559	GO:0007017//microtubule-based process	gi|297746163|emb|CBI16219.3|/0/unnamed protein product [Vitis vinifera]
clementine0.9_001132m.g	3141	0.455616	1.8661	2.25301	-	-	-	gi|255537139|ref|XP_002509636.1|/0/leucine-rich repeat-containing protein, putative [Ricinus communis]
clementine0.9_001136m.g	3990	11.2725	3.48214	5.27016	GO:0016020//membrane	GO:0004674//protein serine/threonine kinase activity	GO:0006970//response to osmotic stress	gi|224133208|ref|XP_002321510.1|/0/predicted protein [Populus trichocarpa]
clementine0.9_001141m.g	3856	20.5714	7.20629	10.1201	GO:0009536//plastid	GO:0019783//small conjugating protein-specific protease activity	-	gi|255554092|ref|XP_002518086.1|/0/conserved hypothetical protein [Ricinus communis]
clementine0.9_001147m.g	3734	24.6381	11.744	12.2376	GO:0005635//nuclear envelope	GO:0005488//binding;GO:0022829//wide pore channel activity	GO:0002218//activation of innate immune response;GO:0006405//RNA export from nucleus;GO:0009725//response to hormone stimulus	gi|255572773|ref|XP_002527319.1|/0/nucleoporin, putative [Ricinus communis]
clementine0.9_001148m.g	3501	65.3442	27.5935	13.9184	-	-	-	gi|296088652|emb|CBI37643.3|/0/unnamed protein product [Vitis vinifera]
clementine0.9_001150m.g	4146	36.7364	13.6663	23.2135	-	GO:0005488//binding	-	gi|297746185|emb|CBI16241.3|/0/unnamed protein product [Vitis vinifera]
clementine0.9_001162m.g	3562	1.66446	0.548514	2.61112	-	-	-	gi|255566084|ref|XP_002524030.1|/0/pentatricopeptide repeat-containing protein, putative [Ricinus communis]
clementine0.9_001163m.g	3120	0.327631	3.68774	9.59114	GO:0000325//plant-type vacuole;GO:0009534//chloroplast thylakoid;GO:0031090//organelle membrane;GO:0031224//intrinsic to membrane	GO:0005515//protein binding;GO:0016836//hydro-lyase activity;GO:0019829//cation-transporting ATPase activity;GO:0032559;GO:0046873//metal ion transmembrane transporter activity;GO:0046914//transition metal ion binding	GO:0006816//calcium ion transport;GO:0006952//defense response;GO:0006970//response to osmotic stress;GO:0009206;GO:0012501//programmed cell death;GO:0050801//ion homeostasis;GO:0051707//response to other organism	gi|224114183|ref|XP_002332421.1|/0/autoinhibited calcium ATPase [Populus trichocarpa]
clementine0.9_001166m.g	3477	8.87853	3.3091	4.8847	-	-	-	gi|224105407|ref|XP_002313800.1|/0/chromatin remodeling complex subunit [Populus trichocarpa]
clementine0.9_001169m.g	5192	21.4994	10.6621	26.5201	-	-	GO:0006351//transcription, DNA-dependent	gi|255556564|ref|XP_002519316.1|/0/Squamosa promoter-binding protein, putative [Ricinus communis]
clementine0.9_001170m.g	3730	18.471	3.78306	6.17958	-	-	-	gi|297737666|emb|CBI26867.3|/4.47048e-166/unnamed protein product [Vitis vinifera]//gi|297737666|emb|CBI26867.3|/5.32025e-166/unnamed protein product [Vitis vinifera]
clementine0.9_001172m.g	5268	3.95843	0.989018	1.53524	-	-	-	gi|255542484|ref|XP_002512305.1|/0/phosphoprotein phosphatase, putative [Ricinus communis]
clementine0.9_001178m.g	3558	14.1351	4.69811	10.6835	GO:0000325//plant-type vacuole;GO:0009534//chloroplast thylakoid;GO:0031090//organelle membrane;GO:0031224//intrinsic to membrane	GO:0005515//protein binding;GO:0016836//hydro-lyase activity;GO:0019829//cation-transporting ATPase activity;GO:0032559;GO:0046873//metal ion transmembrane transporter activity;GO:0046914//transition metal ion binding	GO:0006816//calcium ion transport;GO:0006952//defense response;GO:0006970//response to osmotic stress;GO:0009206;GO:0012501//programmed cell death;GO:0050801//ion homeostasis;GO:0051707//response to other organism	gi|224137802|ref|XP_002322655.1|/0/autoinhibited calcium ATPase [Populus trichocarpa]
clementine0.9_001181m.g	3956	9.7673	2.5243	4.70213	GO:0043231//intracellular membrane-bounded organelle	GO:0016620//oxidoreductase activity, acting on the aldehyde or oxo group of donors, NAD or NADP as acceptor;GO:0046914//transition metal ion binding	GO:0006950//response to stress;GO:0008152//metabolic process	gi|255583235|ref|XP_002532382.1|/0/methylmalonate-semialdehyde dehydrogenase, putative [Ricinus communis]
clementine0.9_001182m.g	4296	16.9892	13.0375	26.6388	GO:0012507//ER to Golgi transport vesicle membrane	GO:0046914//transition metal ion binding	GO:0006996//organelle organization;GO:0015031//protein transport;GO:0048193//Golgi vesicle transport	gi|302142943|emb|CBI20238.3|/0/unnamed protein product [Vitis vinifera]
clementine0.9_001186m.g	3631	6.24979	1.43491	2.89561	GO:0015630//microtubule cytoskeleton	GO:0003774//motor activity;GO:0032559	GO:0007017//microtubule-based process;GO:0030198//extracellular matrix organization	gi|255538224|ref|XP_002510177.1|/0/Kinesin heavy chain, putative [Ricinus communis]
clementine0.9_001189m.g	4076	19.3607	13.6347	32.2931	GO:0005635//nuclear envelope	GO:0005049//nuclear export signal receptor activity;GO:0022892	GO:0006605//protein targeting	gi|255573671|ref|XP_002527757.1|/0/Importin-7, putative [Ricinus communis]
clementine0.9_001190m.g	3634	5.68206	0.119477	0.111278	GO:0016020//membrane;GO:0030312//external encapsulating structure	GO:0003779//actin binding	GO:0007010//cytoskeleton organization	gi|255583387|ref|XP_002532454.1|/0/conserved hypothetical protein [Ricinus communis]
clementine0.9_001192m.g	4820	30.9631	13.4217	18.5412	GO:0016020//membrane	GO:0004673//protein histidine kinase activity;GO:0004888//transmembrane receptor activity;GO:0016791//phosphatase activity;GO:0019901//protein kinase binding;GO:0032559	GO:0006351//transcription, DNA-dependent;GO:0006468//protein phosphorylation;GO:0006826//iron ion transport;GO:0006952//defense response;GO:0006970//response to osmotic stress;GO:0009267//cellular response to starvation;GO:0009409//response to cold;GO:0009737//response to abscisic acid stimulus;GO:0009744//response to sucrose stimulus;GO:0009755//hormone-mediated signaling pathway;GO:0009845//see…	gi|190148357|gb|ACE63261.1|/0/histidine kinase 3 [Betula pendula]
clementine0.9_001194m.g	3102	0.461344	2.72937	1.3688	-	-	GO:0000070//mitotic sister chromatid segregation;GO:0003006//developmental process involved in reproduction	gi|30693126|ref|NP_198579.2|/0/condensin complex subunit 3 [Arabidopsis thaliana]
clementine0.9_001195m.g	3694	7.6375	3.05594	5.69245	-	GO:0003676//nucleic acid binding;GO:0017111//nucleoside-triphosphatase activity;GO:0032559;GO:0046914//transition metal ion binding	-	gi|224095220|ref|XP_002310362.1|/0/chromatin remodeling complex subunit [Populus trichocarpa]
clementine0.9_001197m.g	3096	0.0660341	0.140239	1.11023	GO:0031224//intrinsic to membrane	GO:0019829//cation-transporting ATPase activity;GO:0032559;GO:0046873//metal ion transmembrane transporter activity	GO:0006816//calcium ion transport;GO:0009206	gi|255542302|ref|XP_002512214.1|/0/cation-transporting atpase plant, putative [Ricinus communis]
clementine0.9_001198m.g	3381	1.75356	1.09155	3.28913	GO:0016020//membrane;GO:0043231//intracellular membrane-bounded organelle	-	GO:0048856//anatomical structure development	gi|357477443|ref|XP_003609007.1|/0/Unc-13-like protein [Medicago truncatula]
clementine0.9_001199m.g	3719	9.51018	4.37798	5.98039	GO:0005635//nuclear envelope	GO:0022892	-	gi|297737920|emb|CBI27121.3|/0/unnamed protein product [Vitis vinifera]
clementine0.9_001207m.g	4246	13.3855	3.73234	6.71432	-	GO:0005488//binding	-	gi|296085549|emb|CBI29281.3|/0/unnamed protein product [Vitis vinifera]
clementine0.9_001208m.g	3566	4.75845	1.40018	1.92779	-	-	-	gi|297735041|emb|CBI17403.3|/0/unnamed protein product [Vitis vinifera]
clementine0.9_001210m.g	3273	0.936945	3.97964	4.32429	GO:0031224//intrinsic to membrane	GO:0005515//protein binding;GO:0019829//cation-transporting ATPase activity;GO:0032559;GO:0046873//metal ion transmembrane transporter activity	GO:0006816//calcium ion transport;GO:0009206	gi|255552023|ref|XP_002517056.1|/0/cation-transporting atpase plant, putative [Ricinus communis]
clementine0.9_001221m.g	4350	3.71285	0.449151	0.55777	-	-	-	gi|359486075|ref|XP_002273047.2|/0/PREDICTED: TMV resistance protein N-like [Vitis vinifera]
clementine0.9_001222m.g	3772	4.17338	1.55393	3.64502	-	-	-	gi|255582698|ref|XP_002532127.1|/0/leucine-rich repeat containing protein, putative [Ricinus communis]
clementine0.9_001223m.g	4089	11.3495	4.88438	8.01053	-	-	-	gi|15242667|ref|NP_198850.1|/2.11879e-107/PWWP domain-containing protein [Arabidopsis thaliana]
clementine0.9_001227m.g	3679	40.6216	46.2031	83.8664	GO:0043231//intracellular membrane-bounded organelle	GO:0016624//oxidoreductase activity, acting on the aldehyde or oxo group of donors, disulfide as acceptor;GO:0019842//vitamin binding;GO:0046914//transition metal ion binding	GO:0006007//glucose catabolic process;GO:0010038//response to metal ion	gi|255575120|ref|XP_002528465.1|/0/2-oxoglutarate dehydrogenase, putative [Ricinus communis]
clementine0.9_001229m.g	3445	0.712133	0.882221	2.87587	-	-	-	gi|297733711|emb|CBI14958.3|/0/unnamed protein product [Vitis vinifera]
clementine0.9_001230m.g	3678	8.61567	3.18728	4.50781	-	GO:0005488//binding	GO:0019941//modification-dependent protein catabolic process;GO:0048646//anatomical structure formation involved in morphogenesis;GO:0048878//chemical homeostasis	gi|343887327|dbj|BAK61873.1|/0/F-box / LRR-repeat protein [Citrus unshiu]
clementine0.9_001231m.g	3220	8.44432	4.17998	5.27456	GO:0031410//cytoplasmic vesicle	-	-	gi|79357126|ref|NP_174756.2|/0/uncharacterized protein [Arabidopsis thaliana]
clementine0.9_001232m.g	3627	7.83495	2.15473	6.35507	GO:0043231//intracellular membrane-bounded organelle;GO:0044444//cytoplasmic part	GO:0005515//protein binding	GO:0000904//cell morphogenesis involved in differentiation;GO:0009566//fertilization;GO:0010564//regulation of cell cycle process;GO:0016049//cell growth;GO:0019827//stem cell maintenance;GO:0033043;GO:0040029//regulation of gene expression, epigenetic;GO:0045165//cell fate commitment;GO:0048229//gametophyte development;GO:0048827//phyllome development	gi|254789790|sp|B9SVG9.1|RBR_RICCO/0/RecName: Full=Retinoblastoma-related protein
clementine0.9_001233m.g	3212	3.81896	9.80012	14.2264	GO:0031224//intrinsic to membrane	GO:0019829//cation-transporting ATPase activity;GO:0032559;GO:0046873//metal ion transmembrane transporter activity	GO:0006816//calcium ion transport;GO:0009206	gi|255542302|ref|XP_002512214.1|/0/cation-transporting atpase plant, putative [Ricinus communis]
clementine0.9_001234m.g	3564	3.67123	60.3636	244.911	GO:0016020//membrane	GO:0035251//UDP-glucosyltransferase activity	GO:0005984//disaccharide metabolic process	gi|255561468|ref|XP_002521744.1|/0/sucrose phosphate syntase, putative [Ricinus communis]
clementine0.9_001236m.g	3376	32.3376	3.79392	4.49182	GO:0016020//membrane	GO:0004674//protein serine/threonine kinase activity;GO:0004871//signal transducer activity;GO:0016491//oxidoreductase activity;GO:0032559	GO:0006468//protein phosphorylation;GO:0007167//enzyme linked receptor protein signaling pathway	gi|255553619|ref|XP_002517850.1|/0/Receptor protein kinase CLAVATA1 precursor, putative [Ricinus communis]
clementine0.9_001242m.g	3252	2.07459	0.001	0.248698	-	-	-	gi|255555383|ref|XP_002518728.1|/0/Myosin heavy chain, fast skeletal muscle, embryonic, putative [Ricinus communis]
clementine0.9_001244m.g	3340	4.71317	0.0649969	0.0605364	-	GO:0004672//protein kinase activity;GO:0032559	GO:0006464//protein modification process;GO:0007167//enzyme linked receptor protein signaling pathway	gi|302143484|emb|CBI22045.3|/0/unnamed protein product [Vitis vinifera]//gi|317106662|dbj|BAJ53166.1|/0/JHL10I11.12 [Jatropha curcas]
clementine0.9_001245m.g	3102	17.597	8.46803	15.7738	-	-	-	gi|297737268|emb|CBI26469.3|/0/unnamed protein product [Vitis vinifera]
clementine0.9_001250m.g	3709	14.8274	8.48692	19.734	-	GO:0017111//nucleoside-triphosphatase activity;GO:0032559	-	gi|334185474|ref|NP_188608.4|/0/P-loop containing nucleoside triphosphate hydrolase domain-containing protein [Arabidopsis thaliana]
clementine0.9_001251m.g	3343	3.24122	1.16889	4.0523	GO:0016020//membrane	GO:0000166//nucleotide binding;GO:0003774//motor activity	-	gi|297742519|emb|CBI34668.3|/0/unnamed protein product [Vitis vinifera]
clementine0.9_001252m.g	3511	13.1597	20.899	33.6314	GO:0043231//intracellular membrane-bounded organelle	GO:0003824//catalytic activity	-	gi|255538398|ref|XP_002510264.1|/0/hydrolase, putative [Ricinus communis]
clementine0.9_001253m.g	3844	42.6008	30.3835	60.8048	GO:0043231//intracellular membrane-bounded organelle	GO:0003723//RNA binding	-	gi|255544506|ref|XP_002513314.1|/0/pumilio, putative [Ricinus communis]
clementine0.9_001255m.g	3060	2.87287	0.0709443	0.396454	-	-	-	gi|296084084|emb|CBI24472.3|/0/unnamed protein product [Vitis vinifera]
clementine0.9_001256m.g	3346	0.733203	0.001	0.483423	-	-	-	gi|297738212|emb|CBI27413.3|/0/unnamed protein product [Vitis vinifera]
clementine0.9_001260m.g	3910	22.2219	11.8261	23.7355	-	-	-	gi|297736443|emb|CBI25314.3|/0/unnamed protein product [Vitis vinifera]
clementine0.9_001263m.g	3713	21.9693	8.65318	16.2276	GO:0009526//plastid envelope	GO:0000166//nucleotide binding;GO:0008135//translation factor activity, nucleic acid binding	GO:0006412//translation	gi|255584176|ref|XP_002532827.1|/0/mitochondrial translational initiation factor, putative [Ricinus communis]
clementine0.9_001266m.g	3067	0.266634	0.141565	2.3733	-	GO:0016301//kinase activity	-	gi|359482058|ref|XP_002274540.2|/0/PREDICTED: probable LRR receptor-like serine/threonine-protein kinase At3g47570-like [Vitis vinifera]
clementine0.9_001268m.g	3397	5.23592	2.045	5.41638	-	-	-	gi|297733619|emb|CBI14866.3|/0/unnamed protein product [Vitis vinifera]
clementine0.9_001272m.g	3600	3.23699	1.08545	1.90959	-	GO:0003676//nucleic acid binding;GO:0017111//nucleoside-triphosphatase activity;GO:0032559;GO:0046914//transition metal ion binding	GO:0000725//recombinational repair;GO:0009292//genetic transfer	gi|255573018|ref|XP_002527439.1|/0/DNA repair helicase rad5,16, putative [Ricinus communis]
clementine0.9_001273m.g	3416	7.48103	1.08036	1.7165	GO:0016020//membrane	GO:0004672//protein kinase activity;GO:0032559	GO:0006464//protein modification process	gi|302142859|emb|CBI20154.3|/0/unnamed protein product [Vitis vinifera]
clementine0.9_001275m.g	3489	6.79714	2.73773	2.08624	-	-	-	gi|297738765|emb|CBI28010.3|/0/unnamed protein product [Vitis vinifera]
clementine0.9_001277m.g	3765	21.1229	11.5896	23.2534	GO:0030119//AP-type membrane coat adaptor complex	GO:0005488//binding;GO:0022892	GO:0015031//protein transport	gi|255573014|ref|XP_002527437.1|/0/AP-2 complex subunit alpha, putative [Ricinus communis]
clementine0.9_001282m.g	3728	11.0776	2.56222	4.28464	-	-	-	gi|297733923|emb|CBI15170.3|/5.46453e-32/unnamed protein product [Vitis vinifera]//gi|297738047|emb|CBI27248.3|/4.10167e-54/unnamed protein product [Vitis vinifera]//gi|297738047|emb|CBI27248.3|/4.20421e-54/unnamed protein product [Vitis vinifera]
clementine0.9_001283m.g	3115	4.59419	1.46352	1.23327	GO:0016020//membrane;GO:0031410//cytoplasmic vesicle	GO:0000166//nucleotide binding;GO:0004672//protein kinase activity;GO:0004872//receptor activity	GO:0006952//defense response;GO:0008152//metabolic process;GO:0009719;GO:0009987//cellular process	gi|298204784|emb|CBI25282.3|/0/unnamed protein product [Vitis vinifera]
clementine0.9_001285m.g	3102	0.988595	0.001	0.001	-	GO:0003824//catalytic activity	-	gi|359482058|ref|XP_002274540.2|/0/PREDICTED: probable LRR receptor-like serine/threonine-protein kinase At3g47570-like [Vitis vinifera]
clementine0.9_001286m.g	3545	7.38181	8.02221	16.8255	GO:0009536//plastid	GO:0003676//nucleic acid binding;GO:0034062//RNA polymerase activity	GO:0010467//gene expression	gi|297825331|ref|XP_002880548.1|/0/PDE319/SCA3 [Arabidopsis lyrata subsp. lyrata]
clementine0.9_001288m.g	3293	6.95337	4.41694	9.51707	-	GO:0016301//kinase activity	-	gi|359482058|ref|XP_002274540.2|/0/PREDICTED: probable LRR receptor-like serine/threonine-protein kinase At3g47570-like [Vitis vinifera]
clementine0.9_001289m.g	3693	24.6902	1.29325	2.409	GO:0009536//plastid;GO:0031224//intrinsic to membrane	GO:0004702//receptor signaling protein serine/threonine kinase activity;GO:0005102//receptor binding;GO:0016160//amylase activity;GO:0016628//oxidoreductase activity, acting on the CH-CH group of donors, NAD or NADP as acceptor;GO:0032559	GO:0003006//developmental process involved in reproduction;GO:0005982//starch metabolic process;GO:0006464//protein modification process;GO:0006950//response to stress;GO:0007167//enzyme linked receptor protein signaling pathway;GO:0009933//meristem structural organization;GO:0010073//meristem maintenance	gi|255582421|ref|XP_002531999.1|/0/Receptor protein kinase CLAVATA1 precursor, putative [Ricinus communis]
clementine0.9_001292m.g	3483	3.75661	0.124657	0.174153	-	GO:0015923//mannosidase activity;GO:0046914//transition metal ion binding	GO:0019318//hexose metabolic process	gi|255540059|ref|XP_002511094.1|/0/lysosomal alpha-mannosidase, putative [Ricinus communis]
clementine0.9_001294m.g	3058	0.0668546	0.567925	0.991783	-	-	-	gi|315436720|gb|ADU18533.1|/0/verticillium wilt resistance-like protein [Gossypium barbadense]
clementine0.9_001298m.g	3627	1.8601	0.538684	2.34134	GO:0009536//plastid	GO:0046527//glucosyltransferase activity	GO:0005977//glycogen metabolic process	gi|255557389|ref|XP_002519725.1|/0/starch synthase, putative [Ricinus communis]
clementine0.9_001299m.g	3461	3.30792	4.01437	9.23036	GO:0009526//plastid envelope	GO:0003676//nucleic acid binding;GO:0016462//pyrophosphatase activity;GO:0032559	-	gi|255566048|ref|XP_002524012.1|/0/DNA-binding protein smubp-2, putative [Ricinus communis]
clementine0.9_001301m.g	3294	35.1287	12.3241	13.3198	-	-	-	gi|224069601|ref|XP_002303009.1|/1.23066e-142/predicted protein [Populus trichocarpa]
clementine0.9_001302m.g	3769	0.976372	0.0575987	0.590105	-	-	-	gi|224122712|ref|XP_002318907.1|/3.98262e-169/cc-nbs-lrr resistance protein [Populus trichocarpa]
clementine0.9_001303m.g	3435	6.01123	1.39038	4.17921	GO:0015630//microtubule cytoskeleton	GO:0003774//motor activity;GO:0032559	GO:0007017//microtubule-based process	gi|255564276|ref|XP_002523135.1|/0/kinesin heavy chain, putative [Ricinus communis]
clementine0.9_001307m.g	4361	51.0518	16.6762	20.4463	-	-	-	gi|255536789|ref|XP_002509461.1|/0/smg-7, putative [Ricinus communis]
clementine0.9_001308m.g	3448	19.1516	10.7034	23.632	GO:0043234//protein complex;GO:0044444//cytoplasmic part	-	GO:0000904//cell morphogenesis involved in differentiation;GO:0006887//exocytosis;GO:0009856//pollination;GO:0010192//mucilage biosynthetic process	gi|296085980|emb|CBI31421.3|/0/unnamed protein product [Vitis vinifera]
clementine0.9_001312m.g	3507	2.97306	2.04276	5.65006	-	-	GO:0006950//response to stress	gi|255542504|ref|XP_002512315.1|/0/breast carcinoma amplified sequence, putative [Ricinus communis]
clementine0.9_001314m.g	4454	3.80975	1.36473	2.08819	GO:0015630//microtubule cytoskeleton;GO:0044430//cytoskeletal part	GO:0008092//cytoskeletal protein binding;GO:0016740//transferase activity	GO:0003006//developmental process involved in reproduction	gi|224124794|ref|XP_002329950.1|/0/tubulin gamma complex-associated protein [Populus trichocarpa]//gi|225458503|ref|XP_002282254.1|/0/PREDICTED: uncharacterized protein LOC100247210 [Vitis vinifera]
clementine0.9_001317m.g	3711	72.1137	19.1876	60.4232	GO:0043231//intracellular membrane-bounded organelle	GO:0005515//protein binding;GO:0008289//lipid binding	-	gi|255583860|ref|XP_002532681.1|/5.04081e-100/Epsin-2, putative [Ricinus communis]
clementine0.9_001318m.g	3249	33.7275	13.8312	20.3498	GO:0031410//cytoplasmic vesicle	GO:0015923//mannosidase activity;GO:0046914//transition metal ion binding	GO:0019318//hexose metabolic process	gi|224071325|ref|XP_002303405.1|/0/predicted protein [Populus trichocarpa]
clementine0.9_001321m.g	3289	4.7241	0.264019	0.12295	GO:0009536//plastid	-	-	gi|297735465|emb|CBI17905.3|/0/unnamed protein product [Vitis vinifera]
clementine0.9_001322m.g	3213	3.11784	2.09455	5.03434	-	-	-	gi|255553861|ref|XP_002517971.1|/0/pentatricopeptide repeat-containing protein, putative [Ricinus communis]
clementine0.9_001326m.g	3717	2.42008	0.350427	0.815947	-	-	-	gi|255559733|ref|XP_002520886.1|/1.04483e-118/hypothetical protein RCOM_0690150 [Ricinus communis]//gi|255559733|ref|XP_002520886.1|/9.81e-112/hypothetical protein RCOM_0690150 [Ricinus communis]
clementine0.9_001327m.g	3685	4.60479	2.23864	4.17003	-	-	-	gi|334351263|sp|P93820.3|Y1439_ARATH/0/RecName: Full=BTB/POZ domain-containing protein At1g04390
clementine0.9_001330m.g	3412	4.07445	0.890754	1.42222	GO:0016020//membrane;GO:0031410//cytoplasmic vesicle	GO:0004672//protein kinase activity;GO:0016491//oxidoreductase activity;GO:0032559	GO:0006464//protein modification process;GO:0007167//enzyme linked receptor protein signaling pathway	gi|255554367|ref|XP_002518223.1|/0/receptor protein kinase, putative [Ricinus communis]
clementine0.9_001336m.g	3190	37.8121	10.3441	9.63421	-	GO:0004175//endopeptidase activity;GO:0046914//transition metal ion binding	GO:0019538//protein metabolic process	gi|255582581|ref|XP_002532073.1|/0/Insulin-degrading enzyme, putative [Ricinus communis]
clementine0.9_001340m.g	3555	39.2781	3.78609	3.07126	GO:0031224//intrinsic to membrane	GO:0001071//nucleic acid binding transcription factor activity;GO:0004672//protein kinase activity;GO:0032559	GO:0006351//transcription, DNA-dependent;GO:0006464//protein modification process;GO:0007167//enzyme linked receptor protein signaling pathway;GO:0009845//seed germination;GO:0010431//seed maturation	gi|255536713|ref|XP_002509423.1|/0/protein with unknown function [Ricinus communis]
clementine0.9_001348m.g	3344	48.9706	17.0737	14.2695	GO:0009532//plastid stroma	GO:0005515//protein binding;GO:0016758//transferase activity, transferring hexosyl groups;GO:0048037//cofactor binding	GO:0006950//response to stress;GO:0009628//response to abiotic stimulus;GO:0044238//primary metabolic process	gi|255570250|ref|XP_002526085.1|/0/glycogen phosphorylase, putative [Ricinus communis]
clementine0.9_001349m.g	3687	39.4799	101.921	43.8712	-	GO:0019899//enzyme binding	GO:0006396//RNA processing	gi|302142164|emb|CBI19367.3|/0/unnamed protein product [Vitis vinifera]
clementine0.9_001350m.g	3390	2.95505	0.896535	1.19287	-	-	-	gi|224127917|ref|XP_002329209.1|/0/tir-nbs-lrr resistance protein [Populus trichocarpa]
clementine0.9_001352m.g	3399	54.4937	25.8029	46.3988	GO:0009536//plastid	GO:0004812//aminoacyl-tRNA ligase activity;GO:0032559	GO:0006418//tRNA aminoacylation for protein translation;GO:0010038//response to metal ion	gi|255580622|ref|XP_002531134.1|/0/alanyl-tRNA synthetase, putative [Ricinus communis]
clementine0.9_001353m.g	3803	1.82777	0.0570838	0.478497	-	-	-	gi|224134406|ref|XP_002321815.1|/0/cc-nbs-lrr resistance protein [Populus trichocarpa]
clementine0.9_001356m.g	3583	23.8506	11.0877	13.0919	GO:0016020//membrane	-	-	gi|225433864|ref|XP_002264735.1|/0/PREDICTED: uncharacterized protein LOC100264644 [Vitis vinifera]
clementine0.9_001357m.g	4201	40.3433	13.9008	25.7974	-	GO:0046914//transition metal ion binding	-	gi|297746185|emb|CBI16241.3|/0/unnamed protein product [Vitis vinifera]
clementine0.9_001361m.g	3730	4.32999	1.10582	2.71034	-	-	GO:0009987//cellular process	gi|225432412|ref|XP_002276957.1|/0/PREDICTED: uncharacterized protein LOC100244334 [Vitis vinifera]
clementine0.9_001369m.g	3413	64.5132	12.5305	13.3886	GO:0009536//plastid	-	-	gi|225450585|ref|XP_002282109.1|/0/PREDICTED: uncharacterized protein LOC100264846 [Vitis vinifera]
clementine0.9_001371m.g	3951	36.6867	13.1869	23.5404	GO:0016020//membrane;GO:0044444//cytoplasmic part	GO:0004721//phosphoprotein phosphatase activity;GO:0046914//transition metal ion binding	-	gi|225462440|ref|XP_002264614.1|/0/PREDICTED: serine/threonine-protein phosphatase BSL3-like [Vitis vinifera]
clementine0.9_001375m.g	3617	3.61743	1.20038	1.56521	GO:0015630//microtubule cytoskeleton;GO:0016020//membrane;GO:0043231//intracellular membrane-bounded organelle	GO:0004673//protein histidine kinase activity;GO:0004674//protein serine/threonine kinase activity;GO:0005515//protein binding;GO:0009881//photoreceptor activity;GO:0032559	GO:0006351//transcription, DNA-dependent;GO:0006468//protein phosphorylation;GO:0007017//microtubule-based process;GO:0009416//response to light stimulus;GO:0009606//tropism;GO:0009658//chloroplast organization;GO:0010360;GO:0030522//intracellular receptor mediated signaling pathway	gi|255546656|ref|XP_002514387.1|/0/serine/threonine protein kinase, putative [Ricinus communis]
clementine0.9_001379m.g	3464	51.9957	18.8011	18.5615	GO:0009536//plastid	GO:0005515//protein binding;GO:0016301//kinase activity;GO:0043169//cation binding	GO:0006796//phosphate metabolic process;GO:0009108//coenzyme biosynthetic process	gi|317106685|dbj|BAJ53187.1|/0/JMS09K11.5 [Jatropha curcas]
clementine0.9_001382m.g	3332	1.65664	0.260612	1.45636	-	-	-	gi|297745184|emb|CBI39176.3|/0/unnamed protein product [Vitis vinifera]//gi|334182346|ref|NP_172156.2|/0/pentatricopeptide repeat-containing protein [Arabidopsis thaliana]
clementine0.9_001385m.g	3365	8.50574	4.77403	16.0431	GO:0009536//plastid;GO:0044429//mitochondrial part	GO:0003676//nucleic acid binding;GO:0004175//endopeptidase activity;GO:0032559;GO:0042623//ATPase activity, coupled	GO:0019538//protein metabolic process	gi|224122936|ref|XP_002318953.1|/0/predicted protein [Populus trichocarpa]
clementine0.9_001394m.g	2991	30.0066	10.1613	31.7044	GO:0005635//nuclear envelope	GO:0004871//signal transducer activity;GO:0005488//binding;GO:0022892	GO:0000904//cell morphogenesis involved in differentiation;GO:0006605//protein targeting;GO:0009856//pollination;GO:0048229//gametophyte development	gi|334187726|ref|NP_001190324.1|/0/exportin 1A [Arabidopsis thaliana]
clementine0.9_001396m.g	3596	12.337	5.1918	5.62268	-	GO:0032559;GO:0042623//ATPase activity, coupled	-	gi|255573838|ref|XP_002527838.1|/0/helicase, putative [Ricinus communis]
clementine0.9_001401m.g	3296	11.9712	2.17353	12.2689	GO:0009536//plastid	-	-	gi|255572073|ref|XP_002526977.1|/0/vacuolar protein sorting, putative [Ricinus communis]
clementine0.9_001404m.g	3959	5.06069	0.164503	1.37893	-	GO:0017111//nucleoside-triphosphatase activity	-	gi|255543321|ref|XP_002512723.1|/0/multidrug resistance-associated protein, putative [Ricinus communis]
clementine0.9_001406m.g	3468	4.95187	2.31612	3.61473	GO:0016020//membrane;GO:0043231//intracellular membrane-bounded organelle	GO:0004672//protein kinase activity;GO:0032559	GO:0006464//protein modification process	gi|255586764|ref|XP_002534001.1|/0/serine/threonine protein kinase, putative [Ricinus communis]
clementine0.9_001407m.g	3486	39.2931	19.1183	21.3444	GO:0044424//intracellular part	GO:0008135//translation factor activity, nucleic acid binding	GO:0006412//translation;GO:0019827//stem cell maintenance;GO:0034660//ncRNA metabolic process;GO:0048827//phyllome development	gi|255552031|ref|XP_002517060.1|/0/eukaryotic translation initiation factor 2c, putative [Ricinus communis]
clementine0.9_001409m.g	3406	25.21	5.41768	7.65787	-	GO:0015923//mannosidase activity;GO:0043167//ion binding	GO:0044238//primary metabolic process	gi|255542636|ref|XP_002512381.1|/0/beta-mannosidase, putative [Ricinus communis]
clementine0.9_001410m.g	3412	8.86792	2.29051	3.08147	-	GO:0005488//binding	-	gi|255560281|ref|XP_002521158.1|/0/conserved hypothetical protein [Ricinus communis]
clementine0.9_001413m.g	3181	2.69932	0.0682457	1.71618	-	-	-	gi|359482115|ref|XP_003632713.1|/0/PREDICTED: pentatricopeptide repeat-containing protein At4g13650-like [Vitis vinifera]
clementine0.9_001414m.g	3476	30.1134	5.18367	15.938	-	-	-	gi|296081844|emb|CBI20849.3|/0/unnamed protein product [Vitis vinifera]
clementine0.9_001416m.g	3264	2.50541	0.465572	1.23892	-	GO:0004674//protein serine/threonine kinase activity;GO:0016491//oxidoreductase activity	GO:0008152//metabolic process;GO:0009987//cellular process	gi|255562540|ref|XP_002522276.1|/0/kinase, putative [Ricinus communis]
clementine0.9_001418m.g	2970	43.4352	5.92062	13.3433	-	-	-	gi|296085044|emb|CBI28459.3|/0/unnamed protein product [Vitis vinifera]
clementine0.9_001419m.g	3730	8.82442	6.86771	18.8098	GO:0009527//plastid outer membrane	-	GO:0009658//chloroplast organization	gi|297737876|emb|CBI27077.3|/0/unnamed protein product [Vitis vinifera]
clementine0.9_001420m.g	3469	22.2181	16.5837	39.8671	GO:0016020//membrane;GO:0016604//nuclear body;GO:0030312//external encapsulating structure;GO:0032991//macromolecular complex	GO:0003723//RNA binding;GO:0017111//nucleoside-triphosphatase activity;GO:0032561//guanyl ribonucleotide binding	GO:0003006//developmental process involved in reproduction;GO:0009207;GO:0045595//regulation of cell differentiation	gi|255583486|ref|XP_002532501.1|/0/116 kD U5 small nuclear ribonucleoprotein component, putative [Ricinus communis]
clementine0.9_001422m.g	3876	48.7896	16.9706	26.6042	-	-	GO:0006351//transcription, DNA-dependent	gi|357442095|ref|XP_003591325.1|/0/SQUAMOSA promoter binding protein [Medicago truncatula]
clementine0.9_001424m.g	4146	16.2725	5.23612	6.58366	GO:0043231//intracellular membrane-bounded organelle	GO:0004386//helicase activity;GO:0032559;GO:0042623//ATPase activity, coupled	GO:0003006//developmental process involved in reproduction;GO:0044260	gi|255581147|ref|XP_002531387.1|/0/helicase, putative [Ricinus communis]
clementine0.9_001434m.g	4148	20.1583	18.4223	7.31165	GO:0043231//intracellular membrane-bounded organelle	GO:0004672//protein kinase activity;GO:0032559	GO:0006464//protein modification process	gi|297737836|emb|CBI27037.3|/0/unnamed protein product [Vitis vinifera]
clementine0.9_001435m.g	3911	57.0826	22.7025	30.2951	-	GO:0005488//binding	GO:0009888//tissue development;GO:0040020//regulation of meiosis	gi|255540053|ref|XP_002511091.1|/0/RNA-binding protein, putative [Ricinus communis]
clementine0.9_001436m.g	3241	2.14471	6.76521	10.6679	GO:0031224//intrinsic to membrane	GO:0032559;GO:0043682//copper-transporting ATPase activity;GO:0046872//metal ion binding	GO:0009206;GO:0035434//copper ion transmembrane transport	gi|255544824|ref|XP_002513473.1|/0/copper-transporting atpase p-type, putative [Ricinus communis]
clementine0.9_001440m.g	3615	28.7293	14.4726	12.6405	-	-	-	gi|224115620|ref|XP_002332101.1|/1.8805e-176/cc-nbs-lrr resistance protein [Populus trichocarpa]
clementine0.9_001442m.g	4043	45.1561	32.5393	82.817	-	-	GO:0000212//meiotic spindle organization;GO:0000956//nuclear-transcribed mRNA catabolic process	gi|255570163|ref|XP_002526042.1|/0/smg-7, putative [Ricinus communis]
clementine0.9_001444m.g	2955	1.10696	0.0734651	0.0684236	-	-	-	gi|297739493|emb|CBI29675.3|/5.23992e-129/unnamed protein product [Vitis vinifera]
clementine0.9_001445m.g	4725	5.19216	1.3324	3.50893	-	-	-	gi|224111284|ref|XP_002332949.1|/0/cc-nbs-lrr resistance protein [Populus trichocarpa]
clementine0.9_001448m.g	3857	98.2718	21.163	38.1108	-	GO:0003779//actin binding	GO:0007015//actin filament organization	gi|297739645|emb|CBI29827.3|/0/unnamed protein product [Vitis vinifera]
clementine0.9_001450m.g	3904	12.6729	6.28358	11.3422	-	-	-	gi|255583509|ref|XP_002532512.1|/7.03863e-170/conserved hypothetical protein [Ricinus communis]//gi|359494333|ref|XP_002267683.2|/1.85411e-161/PREDICTED: uncharacterized protein LOC100249836 [Vitis vinifera]
clementine0.9_001451m.g	3323	6.95212	14.3725	21.5395	GO:0009536//plastid	GO:0017111//nucleoside-triphosphatase activity;GO:0032559	GO:0006950//response to stress;GO:0051604//protein maturation	gi|255548768|ref|XP_002515440.1|/0/chaperone clpb, putative [Ricinus communis]
clementine0.9_001453m.g	3204	7.7846	4.60739	9.40279	GO:0031090//organelle membrane;GO:0043231//intracellular membrane-bounded organelle	GO:0016788//hydrolase activity, acting on ester bonds	GO:0006497//protein lipidation	gi|255552708|ref|XP_002517397.1|/0/GPI ethanolamine phosphate transferase, putative [Ricinus communis]
clementine0.9_001454m.g	3122	8.77488	4.38073	5.56966	-	-	-	gi|224077192|ref|XP_002305171.1|/0/predicted protein [Populus trichocarpa]
clementine0.9_001456m.g	3212	10.5658	2.56831	4.78411	GO:0031224//intrinsic to membrane;GO:0044462	GO:0004713//protein tyrosine kinase activity;GO:0004871//signal transducer activity;GO:0016628//oxidoreductase activity, acting on the CH-CH group of donors, NAD or NADP as acceptor;GO:0032559	GO:0003006//developmental process involved in reproduction;GO:0006468//protein phosphorylation;GO:0006950//response to stress;GO:0007167//enzyme linked receptor protein signaling pathway;GO:0032501//multicellular organismal process	gi|255537884|ref|XP_002510007.1|/0/Receptor protein kinase CLAVATA1 precursor, putative [Ricinus communis]
clementine0.9_001458m.g	2946	0.346981	1.32641	2.67667	-	GO:0003723//RNA binding	GO:0002252	gi|224115502|ref|XP_002332150.1|/0/argonaute protein group [Populus trichocarpa]
clementine0.9_001462m.g	3139	2.80057	0.207476	0.450889	GO:0016020//membrane	GO:0004672//protein kinase activity	GO:0009987//cellular process	gi|359479317|ref|XP_002270284.2|/0/PREDICTED: probable inactive receptor kinase At5g10020-like [Vitis vinifera]
clementine0.9_001465m.g	3639	3.25848	2.62488	7.8343	GO:0009536//plastid	GO:0003676//nucleic acid binding;GO:0034062//RNA polymerase activity	GO:0010467//gene expression	gi|255547027|ref|XP_002514571.1|/0/DNA-directed RNA polymerase 2, chloroplast/mitochondrial precursor, putative [Ricinus communis]
clementine0.9_001480m.g	5313	35.4396	13.4021	15.5649	-	-	-	gi|296080954|emb|CBI18647.3|/2.58256e-111/unnamed protein product [Vitis vinifera]//gi|296080954|emb|CBI18647.3|/3.6703e-158/unnamed protein product [Vitis vinifera]//gi|296080954|emb|CBI18647.3|/3.76243e-158/unnamed protein product [Vitis vinifera]//gi|296080954|emb|CBI18647.3|/4.10942e-111/unnamed protein product [Vitis vinifera]//gi|296080954|emb|CBI18647.3|/5.93563e-158/unnamed protein produc…
clementine0.9_001486m.g	3429	14.4284	17.8534	30.1902	-	GO:0016740//transferase activity	-	gi|255545784|ref|XP_002513952.1|/0/protein with unknown function [Ricinus communis]
clementine0.9_001489m.g	3299	3.71824	2.96121	6.25145	GO:0030874//nucleolar chromatin;GO:0044444//cytoplasmic part	GO:0004519//endonuclease activity;GO:0008135//translation factor activity, nucleic acid binding	GO:0003006//developmental process involved in reproduction;GO:0006412//translation;GO:0007126//meiosis;GO:0009553//embryo sac development;GO:0009639//response to red or far red light;GO:0009725//response to hormone stimulus;GO:0009887//organ morphogenesis;GO:0035194//posttranscriptional gene silencing by RNA;GO:0042445//hormone metabolic process;GO:0045087//innate immune response;GO:0048364//root…	gi|297734872|emb|CBI17106.3|/0/unnamed protein product [Vitis vinifera]
clementine0.9_001490m.g	3369	13.2896	10.5677	21.7255	GO:0005635//nuclear envelope	GO:0005049//nuclear export signal receptor activity;GO:0022892	GO:0015031//protein transport	gi|255564665|ref|XP_002523327.1|/0/importin-alpha re-exporter, putative [Ricinus communis]
clementine0.9_001492m.g	3498	139.626	54.3655	50.9814	GO:0016020//membrane	GO:0000166//nucleotide binding;GO:0004672//protein kinase activity	GO:0008152//metabolic process	gi|302142829|emb|CBI20124.3|/0/unnamed protein product [Vitis vinifera]
clementine0.9_001494m.g	3195	3.90326	1.69867	3.73374	GO:0009536//plastid	-	-	gi|255582247|ref|XP_002531915.1|/0/DNA repair protein xp-C / rad4, putative [Ricinus communis]
clementine0.9_001496m.g	3588	60.398	67.1598	127.3	-	GO:0008375//acetylglucosaminyltransferase activity	GO:0006486//protein glycosylation	gi|255562045|ref|XP_002522031.1|/0/o-linked n-acetylglucosamine transferase, ogt, putative [Ricinus communis]
clementine0.9_001498m.g	3839	7.6153	1.753	5.89879	GO:0044424//intracellular part	GO:0019787//small conjugating protein ligase activity	GO:0006355//regulation of transcription, DNA-dependent;GO:0006950//response to stress;GO:0032446//protein modification by small protein conjugation	gi|268044007|gb|ACY92092.1|/0/HOS1 [Citrus trifoliata]
clementine0.9_001501m.g	3210	1.46485	0.270517	3.33837	GO:0044424//intracellular part	GO:0003676//nucleic acid binding;GO:0008408//3'-5' exonuclease activity;GO:0016779//nucleotidyltransferase activity	GO:0006401//RNA catabolic process;GO:0010467//gene expression	gi|255567379|ref|XP_002524669.1|/0/polyribonucleotide nucleotidyltransferase, putative [Ricinus communis]
clementine0.9_001506m.g	2919	1.26069	0.148742	0.27707	-	-	-	gi|224134406|ref|XP_002321815.1|/0/cc-nbs-lrr resistance protein [Populus trichocarpa]
clementine0.9_001507m.g	3575	13.6104	4.12925	9.21881	GO:0009526//plastid envelope;GO:0009532//plastid stroma;GO:0009534//chloroplast thylakoid	GO:0008320//protein transmembrane transporter activity;GO:0017111//nucleoside-triphosphatase activity;GO:0032559	GO:0000904//cell morphogenesis involved in differentiation;GO:0006886//intracellular protein transport;GO:0009642//response to light intensity;GO:0009657//plastid organization;GO:0015979//photosynthesis	gi|357442059|ref|XP_003591307.1|/0/Protein translocase subunit secA [Medicago truncatula]
clementine0.9_001513m.g	3537	45.6048	4.29637	10.5183	GO:0016021//integral to membrane;GO:0031224//intrinsic to membrane	GO:0016209//antioxidant activity;GO:0046914//transition metal ion binding;GO:0050662//coenzyme binding;GO:0050664//oxidoreductase activity, acting on NADH or NADPH, oxygen as acceptor	GO:0006950//response to stress;GO:0008152//metabolic process;GO:0009913//epidermal cell differentiation;GO:0010033//response to organic substance	gi|20805911|gb|AAM28891.1|/0/NADPH oxidase [Nicotiana tabacum]
clementine0.9_001516m.g	3540	6.17945	2.02372	2.22753	-	-	-	gi|224138102|ref|XP_002322730.1|/2.04944e-143/predicted protein [Populus trichocarpa]
clementine0.9_001526m.g	3382	53.619	21.6961	42.8058	GO:0005576//extracellular region;GO:0044444//cytoplasmic part	GO:0004611//phosphoenolpyruvate carboxykinase activity;GO:0016628//oxidoreductase activity, acting on the CH-CH group of donors, NAD or NADP as acceptor;GO:0046872//metal ion binding	GO:0009060//aerobic respiration;GO:0043648//dicarboxylic acid metabolic process;GO:0071704	gi|259506726|gb|ABK54024.2|/0/phosphoenolpyruvate carboxylase [Citrus sinensis]
clementine0.9_001540m.g	3589	6.72168	0.302437	2.42247	GO:0043231//intracellular membrane-bounded organelle	GO:0000166//nucleotide binding;GO:0003774//motor activity	-	gi|255564782|ref|XP_002523385.1|/0/kinesin, putative [Ricinus communis]
clementine0.9_001543m.g	3136	1.69499	0.207675	0.838167	GO:0005881//cytoplasmic microtubule	GO:0000166//nucleotide binding;GO:0004672//protein kinase activity	GO:0008544//epidermis development;GO:0009987//cellular process	gi|255565781|ref|XP_002523880.1|/0/ATP binding protein, putative [Ricinus communis]
clementine0.9_001544m.g	3367	16.6978	7.80155	7.68652	-	GO:0004175//endopeptidase activity;GO:0046914//transition metal ion binding	GO:0019538//protein metabolic process	gi|255582581|ref|XP_002532073.1|/0/Insulin-degrading enzyme, putative [Ricinus communis]
clementine0.9_001548m.g	3589	8.60147	0.846824	3.88722	-	-	-	gi|224134406|ref|XP_002321815.1|/0/cc-nbs-lrr resistance protein [Populus trichocarpa]
clementine0.9_001552m.g	2895	1.34176	0.001	0.488892	-	-	-	gi|224132258|ref|XP_002328224.1|/0/cc-nbs-lrr resistance protein [Populus trichocarpa]
clementine0.9_001555m.g	3321	2.77021	0.392212	1.4003	GO:0031224//intrinsic to membrane;GO:0031410//cytoplasmic vesicle	GO:0004702//receptor signaling protein serine/threonine kinase activity;GO:0016628//oxidoreductase activity, acting on the CH-CH group of donors, NAD or NADP as acceptor;GO:0032559	GO:0006464//protein modification process	gi|255537886|ref|XP_002510008.1|/0/receptor protein kinase, putative [Ricinus communis]
clementine0.9_001558m.g	3706	28.0238	8.2009	16.0946	-	GO:0008092//cytoskeletal protein binding	GO:0006996//organelle organization;GO:0009725//response to hormone stimulus	gi|297735417|emb|CBI17857.3|/0/unnamed protein product [Vitis vinifera]
clementine0.9_001559m.g	5092	3.17181	3.02697	7.42534	-	GO:0000166//nucleotide binding;GO:0003774//motor activity	-	gi|359474911|ref|XP_002275329.2|/0/PREDICTED: uncharacterized protein LOC100250389 [Vitis vinifera]
clementine0.9_001561m.g	2889	1.48608	0.0751435	0.62988	-	-	-	gi|224132258|ref|XP_002328224.1|/0/cc-nbs-lrr resistance protein [Populus trichocarpa]
clementine0.9_001575m.g	3370	48.2894	23.4482	19.9792	-	GO:0000166//nucleotide binding;GO:0004674//protein serine/threonine kinase activity;GO:0004871//signal transducer activity	GO:0009987//cellular process	gi|255542402|ref|XP_002512264.1|/0/map3k delta-1 protein kinase, putative [Ricinus communis]
clementine0.9_001578m.g	3177	12.484	6.83316	17.1198	-	GO:0022892	GO:0015031//protein transport	gi|225457174|ref|XP_002283854.1|/0/PREDICTED: transportin-3 [Vitis vinifera]//gi|255540833|ref|XP_002511481.1|/0/transportin, putative [Ricinus communis]
clementine0.9_001580m.g	3428	25.585	9.68923	11.3246	GO:0031224//intrinsic to membrane	GO:0004674//protein serine/threonine kinase activity;GO:0032559	GO:0006464//protein modification process	gi|255583590|ref|XP_002532551.1|/0/Serine/threonine-protein kinase PBS1, putative [Ricinus communis]
clementine0.9_001582m.g	3869	19.2869	8.69705	16.2527	GO:0043231//intracellular membrane-bounded organelle	GO:0008409//5'-3' exonuclease activity;GO:0046872//metal ion binding	GO:0000160//two-component signal transduction system (phosphorelay);GO:0000902//cell morphogenesis;GO:0009606//tropism;GO:0009725//response to hormone stimulus;GO:0010468//regulation of gene expression;GO:0010586//miRNA metabolic process;GO:0031086//nuclear-transcribed mRNA catabolic process, deadenylation-independent decay;GO:0043200//response to amino acid stimulus	gi|255542378|ref|XP_002512252.1|/0/5'->3' exoribonuclease, putative [Ricinus communis]
clementine0.9_001588m.g	3902	27.7688	13.2969	28.4996	-	-	-	gi|255539136|ref|XP_002510633.1|/0/scythe/bat3, putative [Ricinus communis]//gi|255539136|ref|XP_002510633.1|/4.50242e-180/scythe/bat3, putative [Ricinus communis]
clementine0.9_001597m.g	4932	17.6171	8.05502	8.97809	-	GO:0046872//metal ion binding	-	gi|255542696|ref|XP_002512411.1|/0/transcription factor, putative [Ricinus communis]
clementine0.9_001601m.g	3326	25.4476	9.33367	16.9	GO:0016020//membrane;GO:0031410//cytoplasmic vesicle	GO:0000166//nucleotide binding;GO:0004672//protein kinase activity	GO:0008152//metabolic process	gi|297745743|emb|CBI15799.3|/0/unnamed protein product [Vitis vinifera]
clementine0.9_001604m.g	2993	7.51372	1.74078	3.4453	GO:0016020//membrane;GO:0043231//intracellular membrane-bounded organelle	GO:0004702//receptor signaling protein serine/threonine kinase activity;GO:0016628//oxidoreductase activity, acting on the CH-CH group of donors, NAD or NADP as acceptor;GO:0032559	GO:0006464//protein modification process	gi|255556695|ref|XP_002519381.1|/0/Serine/threonine-protein kinase PBS1, putative [Ricinus communis]
clementine0.9_001605m.g	3142	6.63687	0.898206	10.6823	GO:0015629//actin cytoskeleton	GO:0008092//cytoskeletal protein binding;GO:0017111//nucleoside-triphosphatase activity;GO:0032559	GO:0000904//cell morphogenesis involved in differentiation;GO:0007275//multicellular organismal development;GO:0030029//actin filament-based process;GO:0040007//growth;GO:0048608//reproductive structure development;GO:0051640//organelle localization	gi|297738619|emb|CBI27864.3|/0/unnamed protein product [Vitis vinifera]
clementine0.9_001606m.g	3137	3.51924	1.66087	1.35353	GO:0005635//nuclear envelope;GO:0031981//nuclear lumen;GO:0044444//cytoplasmic part	GO:0022892	GO:0006605//protein targeting	gi|225431871|ref|XP_002275593.1|/2.1021e-176/PREDICTED: importin subunit alpha-1 [Vitis vinifera]
clementine0.9_001607m.g	3042	13.5085	0.214092	0.132933	GO:0031224//intrinsic to membrane	GO:0004672//protein kinase activity;GO:0004871//signal transducer activity;GO:0016628//oxidoreductase activity, acting on the CH-CH group of donors, NAD or NADP as acceptor;GO:0032559	GO:0006464//protein modification process;GO:0007167//enzyme linked receptor protein signaling pathway;GO:0010065;GO:0010087//phloem or xylem histogenesis	gi|255565085|ref|XP_002523535.1|/0/Receptor protein kinase CLAVATA1 precursor, putative [Ricinus communis]
clementine0.9_001611m.g	2921	5.59922	11.6683	20.3507	GO:0031224//intrinsic to membrane	GO:0004553//hydrolase activity, hydrolyzing O-glycosyl compounds	GO:0006678//glucosylceramide metabolic process	gi|297739499|emb|CBI29681.3|/0/unnamed protein product [Vitis vinifera]
clementine0.9_001614m.g	3505	20.59	40.8165	122.584	GO:0031224//intrinsic to membrane	GO:0032559;GO:0042625//ATPase activity, coupled to transmembrane movement of ions	GO:0006811//ion transport;GO:0009206;GO:0009207	gi|6759597|emb|CAB69823.1|/0/plasma membrane H+ ATPase [Prunus persica]
clementine0.9_001615m.g	3354	6.46118	0.258902	0.361702	-	-	-	gi|296085339|emb|CBI29071.3|/0/unnamed protein product [Vitis vinifera]
clementine0.9_001621m.g	3104	16.1367	1.60859	8.14238	-	GO:0004674//protein serine/threonine kinase activity	GO:0008152//metabolic process;GO:0009987//cellular process	gi|255562540|ref|XP_002522276.1|/0/kinase, putative [Ricinus communis]
clementine0.9_001624m.g	3250	12.2036	9.08436	21.1524	GO:0031234//extrinsic to internal side of plasma membrane;GO:0031981//nuclear lumen	GO:0004683//calmodulin-dependent protein kinase activity	-	gi|255556832|ref|XP_002519449.1|/0/WD-repeat protein, putative [Ricinus communis]
clementine0.9_001629m.g	3442	14.0175	1.95519	1.35108	GO:0031224//intrinsic to membrane;GO:0031410//cytoplasmic vesicle;GO:0043231//intracellular membrane-bounded organelle	GO:0004672//protein kinase activity;GO:0016628//oxidoreductase activity, acting on the CH-CH group of donors, NAD or NADP as acceptor;GO:0032559	GO:0003006//developmental process involved in reproduction;GO:0006464//protein modification process;GO:0006833//water transport;GO:0006952//defense response;GO:0007047//cellular cell wall organization;GO:0007155//cell adhesion;GO:0009886//post-embryonic morphogenesis;GO:0009887//organ morphogenesis;GO:0009943//adaxial/abaxial axis specification;GO:0016049//cell growth;GO:0050794//regulation of ce…	gi|343887334|dbj|BAK61880.1|/0/LRR receptor-like serine/threonine-protein kinase [Citrus unshiu]
clementine0.9_001631m.g	3165	21.7037	8.8482	9.19924	-	-	-	gi|296085288|emb|CBI29020.3|/4.16595e-66/unnamed protein product [Vitis vinifera]//gi|357439279|ref|XP_003589916.1|/9.78597e-89/Rpp4 candidate [Medicago truncatula]
clementine0.9_001632m.g	3271	13.9378	6.10585	12.3627	GO:0009536//plastid	GO:0004812//aminoacyl-tRNA ligase activity;GO:0032559	GO:0003006//developmental process involved in reproduction;GO:0006418//tRNA aminoacylation for protein translation	gi|255554793|ref|XP_002518434.1|/0/leucyl-tRNA synthetase, putative [Ricinus communis]
clementine0.9_001633m.g	3500	10.0468	4.58989	8.54982	GO:0043231//intracellular membrane-bounded organelle	GO:0003824//catalytic activity	GO:0006497//protein lipidation	gi|255578902|ref|XP_002530304.1|/0/phosphatidylinositol glycan, putative [Ricinus communis]
clementine0.9_001637m.g	3537	6.8205	0.920651	2.22942	-	-	-	gi|147805313|emb|CAN69616.1|/0/hypothetical protein VITISV_000426 [Vitis vinifera]
clementine0.9_001638m.g	3683	58.396	6.4838	6.03885	GO:0016020//membrane;GO:0031410//cytoplasmic vesicle	GO:0000166//nucleotide binding;GO:0004674//protein serine/threonine kinase activity;GO:0004871//signal transducer activity;GO:0016491//oxidoreductase activity	GO:0008152//metabolic process;GO:0009987//cellular process	gi|359807055|ref|NP_001241340.1|/0/receptor-like protein kinase HSL1-like [Glycine max]
clementine0.9_001651m.g	3890	5.0979	1.50679	0.779659	GO:0009536//plastid	GO:0005488//binding	-	gi|224113413|ref|XP_002316488.1|/0/predicted protein [Populus trichocarpa]//gi|255549482|ref|XP_002515794.1|/0/pentatricopeptide repeat-containing protein, putative [Ricinus communis]
clementine0.9_001654m.g	3345	72.3032	34.6564	23.3926	GO:0044464//cell part	GO:0016790//thiolester hydrolase activity;GO:0046914//transition metal ion binding;GO:0070011	GO:0019941//modification-dependent protein catabolic process	gi|302142802|emb|CBI20097.3|/0/unnamed protein product [Vitis vinifera]
clementine0.9_001655m.g	3713	3.57896	0.643142	0.163365	GO:0009536//plastid	-	-	gi|255539459|ref|XP_002510794.1|/0/ATP binding protein, putative [Ricinus communis]//gi|255539459|ref|XP_002510794.1|/5.42839e-171/ATP binding protein, putative [Ricinus communis]
clementine0.9_001667m.g	4050	30.4391	8.46917	12.3811	GO:0016020//membrane	GO:0048037//cofactor binding	-	gi|255562713|ref|XP_002522362.1|/0/molybdopterin cofactor sulfurase, putative [Ricinus communis]
clementine0.9_001671m.g	3228	5.82671	2.75733	5.63731	-	-	-	gi|357506205|ref|XP_003623391.1|/0/Integrator complex subunit [Medicago truncatula]
clementine0.9_001674m.g	3795	28.9827	6.86449	14.918	GO:0000325//plant-type vacuole	GO:0046914//transition metal ion binding	GO:0006996//organelle organization	gi|255588437|ref|XP_002534605.1|/0/expressed protein, putative [Ricinus communis]
clementine0.9_001675m.g	3048	24.1466	8.68928	13.6652	GO:0031224//intrinsic to membrane;GO:0043231//intracellular membrane-bounded organelle	GO:0004553//hydrolase activity, hydrolyzing O-glycosyl compounds	GO:0006678//glucosylceramide metabolic process	gi|297741007|emb|CBI31319.3|/0/unnamed protein product [Vitis vinifera]
clementine0.9_001678m.g	3084	7.82234	2.39333	4.85155	GO:0044464//cell part	GO:0004527//exonuclease activity;GO:0005488//binding;GO:0016787//hydrolase activity	GO:0034641//cellular nitrogen compound metabolic process	gi|297739148|emb|CBI28799.3|/0/unnamed protein product [Vitis vinifera]
clementine0.9_001684m.g	4083	70.0999	29.6152	55.7599	GO:0043231//intracellular membrane-bounded organelle	GO:0003676//nucleic acid binding;GO:0046983//protein dimerization activity	GO:0048438//floral whorl development	gi|356515969|ref|XP_003526669.1|/0/PREDICTED: transcriptional corepressor SEUSS-like [Glycine max]
clementine0.9_001687m.g	3722	6.81105	3.09128	4.99775	-	-	-	gi|147858727|emb|CAN82909.1|/4.62663e-178/hypothetical protein VITISV_025072 [Vitis vinifera]
clementine0.9_001690m.g	4018	5.85136	1.78297	3.62314	GO:0030313;GO:0031224//intrinsic to membrane	GO:0005231//excitatory extracellular ligand-gated ion channel activity;GO:0008066//glutamate receptor activity	GO:0006810//transport;GO:0006875//cellular metal ion homeostasis;GO:0007166//cell surface receptor linked signaling pathway;GO:0009314//response to radiation	gi|224081501|ref|XP_002306436.1|/0/glutamate-gated kainate-type ion channel receptor subunit GluR5 [Populus trichocarpa]
clementine0.9_001691m.g	3368	5.3417	3.28728	12.2468	-	-	GO:0044249//cellular biosynthetic process;GO:0050896//response to stimulus	gi|124360602|gb|ABN08601.1|/0/CIP7 , related [Medicago truncatula]
clementine0.9_001692m.g	3117	10.9534	3.27341	5.38399	-	-	-	gi|224128410|ref|XP_002329155.1|/1.45626e-153/BED finger-nbs-lrr resistance protein [Populus trichocarpa]
clementine0.9_001693m.g	3412	21.99	11.1981	24.3554	GO:0043231//intracellular membrane-bounded organelle	-	-	gi|297742900|emb|CBI35691.3|/0/unnamed protein product [Vitis vinifera]
clementine0.9_001701m.g	3105	0.98764	0.419497	0.001	-	-	-	gi|225454494|ref|XP_002276948.1|/0/PREDICTED: pentatricopeptide repeat-containing protein At4g01030, mitochondrial-like [Vitis vinifera]
clementine0.9_001708m.g	3538	4.33384	3.12933	6.34349	-	GO:0019203//carbohydrate phosphatase activity;GO:0035251//UDP-glucosyltransferase activity	GO:0003006//developmental process involved in reproduction;GO:0005991//trehalose metabolic process;GO:0007275//multicellular organismal development;GO:0009756//carbohydrate mediated signaling;GO:0042546//cell wall biogenesis	gi|292677821|dbj|BAI99252.1|/0/trehalose 6-phosphate synthase [Nicotiana tabacum]
clementine0.9_001712m.g	3694	6.86268	1.58674	1.31364	-	-	GO:0006351//transcription, DNA-dependent	gi|224065683|ref|XP_002301919.1|/0/predicted protein [Populus trichocarpa]
clementine0.9_001713m.g	3040	3.16077	0.214233	0.731614	GO:0016020//membrane	GO:0000166//nucleotide binding;GO:0004672//protein kinase activity	GO:0008152//metabolic process;GO:0010065;GO:0010087//phloem or xylem histogenesis	gi|224071507|ref|XP_002303493.1|/0/predicted protein [Populus trichocarpa]
clementine0.9_001718m.g	5471	70.6259	104.993	30.4156	-	GO:0005488//binding	GO:0006396//RNA processing	gi|255568764|ref|XP_002525353.1|/0/conserved hypothetical protein [Ricinus communis]//gi|357485911|ref|XP_003613243.1|/5.04762e-170/RNA-binding protein [Medicago truncatula]
clementine0.9_001721m.g	3285	8.46394	9.91276	18.7112	GO:0009536//plastid	-	GO:0000377;GO:0009791//post-embryonic development	gi|224111046|ref|XP_002315729.1|/0/predicted protein [Populus trichocarpa]
clementine0.9_001740m.g	3414	41.7386	4.32399	9.29821	GO:0031410//cytoplasmic vesicle;GO:0044464//cell part	GO:0004672//protein kinase activity;GO:0032559	GO:0006464//protein modification process	gi|224100089|ref|XP_002311739.1|/0/predicted protein [Populus trichocarpa]//gi|255547926|ref|XP_002515020.1|/0/protein with unknown function [Ricinus communis]
clementine0.9_001742m.g	2843	1.65394	2.59622	4.33826	-	GO:0003676//nucleic acid binding;GO:0017111//nucleoside-triphosphatase activity;GO:0032559;GO:0046872//metal ion binding	GO:0000725//recombinational repair;GO:0010212//response to ionizing radiation	gi|255555479|ref|XP_002518776.1|/0/DNA repair and recombination protein RAD54B, putative [Ricinus communis]
clementine0.9_001743m.g	3590	11.1048	13.1221	30.5259	GO:0009536//plastid;GO:0031090//organelle membrane;GO:0031410//cytoplasmic vesicle	GO:0016491//oxidoreductase activity;GO:0016628//oxidoreductase activity, acting on the CH-CH group of donors, NAD or NADP as acceptor;GO:0032559	GO:0008152//metabolic process;GO:0050896//response to stimulus	gi|297741947|emb|CBI33392.3|/0/unnamed protein product [Vitis vinifera]
clementine0.9_001744m.g	3510	2.5628	0.989582	5.06919	-	-	-	gi|297821058|ref|XP_002878412.1|/0/EMB1703 [Arabidopsis lyrata subsp. lyrata]
clementine0.9_001746m.g	4103	11.7592	5.60845	6.75122	GO:0016020//membrane;GO:0030313;GO:0031224//intrinsic to membrane	GO:0005216//ion channel activity;GO:0005231//excitatory extracellular ligand-gated ion channel activity;GO:0008066//glutamate receptor activity	GO:0006810//transport;GO:0006875//cellular metal ion homeostasis;GO:0009314//response to radiation	gi|255559169|ref|XP_002520606.1|/0/glutamate receptor 3 plant, putative [Ricinus communis]
clementine0.9_001750m.g	3700	5.19392	1.64284	2.34979	-	-	-	gi|224115986|ref|XP_002332020.1|/4.34307e-144/BED finger-nbs-lrr resistance protein [Populus trichocarpa]
clementine0.9_001751m.g	3399	21.7734	3.44891	13.4437	GO:0016020//membrane;GO:0031410//cytoplasmic vesicle	GO:0004702//receptor signaling protein serine/threonine kinase activity;GO:0032559	GO:0006464//protein modification process	gi|297741494|emb|CBI32626.3|/0/unnamed protein product [Vitis vinifera]
clementine0.9_001752m.g	3640	12.4687	2.86272	2.66626	-	GO:0005515//protein binding	GO:0006511//ubiquitin-dependent protein catabolic process;GO:0009693//ethylene biosynthetic process;GO:0009756//carbohydrate mediated signaling;GO:0048528//post-embryonic root development;GO:0051301//cell division	gi|255560353|ref|XP_002521192.1|/0/Ethylene-overproduction protein, putative [Ricinus communis]
clementine0.9_001755m.g	3526	15.7129	6.21839	9.34692	-	-	-	gi|255572741|ref|XP_002527303.1|/4.72849e-145/conserved hypothetical protein [Ricinus communis]//gi|255572741|ref|XP_002527303.1|/4.7425e-145/conserved hypothetical protein [Ricinus communis]//gi|255572741|ref|XP_002527303.1|/4.74718e-145/conserved hypothetical protein [Ricinus communis]//gi|255572741|ref|XP_002527303.1|/4.85464e-145/conserved hypothetical protein [Ricinus communis]
clementine0.9_001756m.g	3534	29.677	11.8558	18.3082	-	GO:0016301//kinase activity;GO:0032559	GO:0006796//phosphate metabolic process;GO:0009108//coenzyme biosynthetic process	gi|255540653|ref|XP_002511391.1|/0/Pantothenate kinase, putative [Ricinus communis]
clementine0.9_001765m.g	3611	1.47202	12.5649	45.0186	GO:0016020//membrane;GO:0030313;GO:0031224//intrinsic to membrane	GO:0005216//ion channel activity;GO:0005231//excitatory extracellular ligand-gated ion channel activity;GO:0008066//glutamate receptor activity	GO:0006810//transport	gi|296082561|emb|CBI21566.3|/0/unnamed protein product [Vitis vinifera]
clementine0.9_001768m.g	3089	1.52223	0.140556	0.85092	-	GO:0001071//nucleic acid binding transcription factor activity;GO:0003723//RNA binding	GO:0003006//developmental process involved in reproduction;GO:0006479//protein methylation;GO:0009292//genetic transfer;GO:0009887//organ morphogenesis;GO:0040029//regulation of gene expression, epigenetic;GO:0040030//regulation of molecular function, epigenetic	gi|296082393|emb|CBI21398.3|/0/unnamed protein product [Vitis vinifera]
clementine0.9_001769m.g	2914	10.8745	6.2579	15.4731	GO:0016020//membrane	-	-	gi|296090238|emb|CBI40057.3|/0/unnamed protein product [Vitis vinifera]
clementine0.9_001771m.g	3159	34.3001	20.8912	47.2996	GO:0009536//plastid	GO:0004558//alpha-glucosidase activity;GO:0005488//binding	GO:0000902//cell morphogenesis;GO:0006952//defense response;GO:0009250//glucan biosynthetic process;GO:0010038//response to metal ion	gi|255577053|ref|XP_002529411.1|/0/neutral alpha-glucosidase ab precursor, putative [Ricinus communis]
clementine0.9_001773m.g	3174	23.7678	10.1226	14.5879	-	GO:0016787//hydrolase activity	-	gi|255545960|ref|XP_002514040.1|/0/sentrin/sumo-specific protease, putative [Ricinus communis]
clementine0.9_001775m.g	3338	22.7225	16.1939	43.1277	-	-	-	gi|224131040|ref|XP_002328438.1|/2.28302e-136/predicted protein [Populus trichocarpa]//gi|224131040|ref|XP_002328438.1|/6.5807e-165/predicted protein [Populus trichocarpa]
clementine0.9_001778m.g	3758	6.85461	4.15925	8.39326	-	-	-	gi|297736093|emb|CBI24131.3|/0/unnamed protein product [Vitis vinifera]
clementine0.9_001780m.g	3930	52.0207	23.6423	50.3678	GO:0030139//endocytic vesicle;GO:0031090//organelle membrane	GO:0005515//protein binding;GO:0017111//nucleoside-triphosphatase activity;GO:0032561//guanyl ribonucleotide binding	GO:0006892//post-Golgi vesicle-mediated transport;GO:0006897//endocytosis;GO:0009207;GO:0009725//response to hormone stimulus	gi|51477379|gb|AAU04752.1|/0/DRP [Cucumis melo]
clementine0.9_001781m.g	3778	35.7691	10.6304	21.5678	GO:0043231//intracellular membrane-bounded organelle;GO:0044444//cytoplasmic part	GO:0005488//binding;GO:0008375//acetylglucosaminyltransferase activity	GO:0009740//gibberellic acid mediated signaling pathway	gi|255579381|ref|XP_002530535.1|/0/o-linked n-acetylglucosamine transferase, ogt, putative [Ricinus communis]
clementine0.9_001782m.g	3492	25.5845	8.0818	11.4066	-	GO:0016702//oxidoreductase activity, acting on single donors with incorporation of molecular oxygen, incorporation of two atoms of oxygen;GO:0046914//transition metal ion binding	GO:0006633//fatty acid biosynthetic process	gi|255547812|ref|XP_002514963.1|/0/lipoxygenase, putative [Ricinus communis]
clementine0.9_001783m.g	3031	10.8595	4.6555	11.5405	-	-	-	gi|255577123|ref|XP_002529445.1|/0/esophageal cancer associated protein, putative [Ricinus communis]
clementine0.9_001784m.g	2986	0.547733	0.654322	2.64081	-	-	-	gi|296088635|emb|CBI37626.3|/0/unnamed protein product [Vitis vinifera]
clementine0.9_001786m.g	3851	9.02494	3.26959	11.4983	GO:0030312//external encapsulating structure;GO:0044444//cytoplasmic part	-	GO:0003006//developmental process involved in reproduction;GO:0008154//actin polymerization or depolymerization	gi|224117388|ref|XP_002317562.1|/0/predicted protein [Populus trichocarpa]
clementine0.9_001787m.g	4462	18.1441	8.56292	18.171	-	-	GO:0006950//response to stress	gi|255563665|ref|XP_002522834.1|/0/breast carcinoma amplified sequence, putative [Ricinus communis]
clementine0.9_001789m.g	3233	59.1255	11.818	13.1959	GO:0000790//nuclear chromatin;GO:0016604//nuclear body	GO:0008135//translation factor activity, nucleic acid binding	GO:0006305;GO:0006342//chromatin silencing;GO:0006412//translation;GO:0016246//RNA interference;GO:0034968//histone lysine methylation;GO:0042742//defense response to bacterium	gi|255573685|ref|XP_002527764.1|/0/eukaryotic translation initiation factor 2c, putative [Ricinus communis]
clementine0.9_001790m.g	2763	2.44176	0.549992	1.46357	-	-	-	gi|296087815|emb|CBI35071.3|/1.58587e-87/unnamed protein product [Vitis vinifera]
clementine0.9_001802m.g	3065	14.0074	5.38297	15.3705	-	GO:0046914//transition metal ion binding	-	gi|225428847|ref|XP_002282377.1|/3.96888e-79/PREDICTED: uncharacterized protein LOC100258840 [Vitis vinifera]
clementine0.9_001806m.g	2748	13.4658	4.97694	7.65208	GO:0043231//intracellular membrane-bounded organelle	GO:0016790//thiolester hydrolase activity;GO:0019783//small conjugating protein-specific protease activity	GO:0019941//modification-dependent protein catabolic process	gi|296088825|emb|CBI38283.3|/0/unnamed protein product [Vitis vinifera]
clementine0.9_001807m.g	3046	18.3232	7.48339	12.8776	GO:0009536//plastid	GO:0005488//binding	-	gi|359481004|ref|XP_002268494.2|/0/PREDICTED: zinc finger protein VAR3, chloroplastic-like [Vitis vinifera]
clementine0.9_001810m.g	3689	22.3339	8.70947	17.2101	GO:0016020//membrane	-	-	gi|255586545|ref|XP_002533909.1|/0/hypothetical protein RCOM_0237030 [Ricinus communis]
clementine0.9_001812m.g	3227	4.56145	2.35455	5.32578	GO:0005635//nuclear envelope;GO:0031224//intrinsic to membrane	GO:0005515//protein binding;GO:0015075//ion transmembrane transporter activity	GO:0006811//ion transport;GO:0044003//modification by symbiont of host morphology or physiology	gi|357445307|ref|XP_003592931.1|/0/DMI1 protein [Medicago truncatula]
clementine0.9_001816m.g	3306	10.5746	4.33391	5.87126	GO:0015630//microtubule cytoskeleton	GO:0003774//motor activity;GO:0032559	GO:0007017//microtubule-based process;GO:0048513//organ development	gi|255537143|ref|XP_002509638.1|/0/Kinesin heavy chain, putative [Ricinus communis]
clementine0.9_001820m.g	3519	2.78863	1.23381	3.27506	GO:0016020//membrane	GO:0000166//nucleotide binding;GO:0004672//protein kinase activity;GO:0004871//signal transducer activity	GO:0001708//cell fate specification;GO:0008152//metabolic process;GO:0009555//pollen development	gi|255539505|ref|XP_002510817.1|/0/leucine-rich repeat receptor protein kinase exs precursor, putative [Ricinus communis]
clementine0.9_001822m.g	3507	11.8922	3.28079	4.78526	GO:0030313;GO:0031224//intrinsic to membrane	GO:0005231//excitatory extracellular ligand-gated ion channel activity;GO:0005488//binding;GO:0008066//glutamate receptor activity	GO:0006810//transport;GO:0006875//cellular metal ion homeostasis;GO:0007166//cell surface receptor linked signaling pathway;GO:0009314//response to radiation	gi|255566389|ref|XP_002524180.1|/0/glutamate receptor 3 plant, putative [Ricinus communis]
clementine0.9_001825m.g	3085	11.6634	3.23699	6.75064	GO:0005856//cytoskeleton	GO:0003779//actin binding	GO:0051693//actin filament capping	gi|297745909|emb|CBI15965.3|/0/unnamed protein product [Vitis vinifera]
clementine0.9_001826m.g	2806	2.40434	0.464197	1.29702	-	-	-	gi|24461863|gb|AAN62350.1|AF506028_17/0/NBS-LRR type disease resistance protein [Citrus trifoliata]
clementine0.9_001827m.g	3419	4.24549	0.38097	0.709652	GO:0005618//cell wall;GO:0016020//membrane	GO:0004672//protein kinase activity;GO:0016491//oxidoreductase activity;GO:0032559	GO:0006464//protein modification process;GO:0007167//enzyme linked receptor protein signaling pathway;GO:0008152//metabolic process;GO:0009987//cellular process	gi|255536845|ref|XP_002509489.1|/0/lrr receptor protein kinase, putative [Ricinus communis]
clementine0.9_001832m.g	3102	1.0545	0.979772	2.93315	GO:0031224//intrinsic to membrane	GO:0016209//antioxidant activity;GO:0046914//transition metal ion binding;GO:0050662//coenzyme binding;GO:0050664//oxidoreductase activity, acting on NADH or NADPH, oxygen as acceptor	GO:0006952//defense response;GO:0008152//metabolic process;GO:0012501//programmed cell death	gi|282927332|gb|ACF05504.2|/0/respiratory burst oxidase-like protein [Citrullus colocynthis]
clementine0.9_001834m.g	3104	11.1969	2.65767	5.27626	-	GO:0016833//oxo-acid-lyase activity	GO:0003006//developmental process involved in reproduction;GO:0034641//cellular nitrogen compound metabolic process	gi|255577381|ref|XP_002529570.1|/0/p-aminobenzoate synthase, putative [Ricinus communis]
clementine0.9_001835m.g	3418	132.965	258.183	361.082	-	GO:0017111//nucleoside-triphosphatase activity;GO:0032559	GO:0000302//response to reactive oxygen species;GO:0009642//response to light intensity;GO:0044267//cellular protein metabolic process	gi|59805048|gb|AAX08108.1|/0/heat shock protein 101 [Vitis vinifera]
clementine0.9_001843m.g	4238	4.14865	1.58796	2.33775	-	-	-	gi|147857775|emb|CAN80799.1|/0/hypothetical protein VITISV_019809 [Vitis vinifera]
clementine0.9_001846m.g	3196	25.2034	11.3435	14.867	GO:0030529//ribonucleoprotein complex	-	GO:0009987//cellular process	gi|255564196|ref|XP_002523095.1|/0/U3 small nucleolar RNA-associated protein, putative [Ricinus communis]
clementine0.9_001850m.g	3103	40.9805	12.9428	18.5055	GO:0009527//plastid outer membrane	GO:0004872//receptor activity;GO:0016787//hydrolase activity;GO:0032561//guanyl ribonucleotide binding	GO:0006605//protein targeting	gi|255574744|ref|XP_002528280.1|/0/protein translocase, putative [Ricinus communis]
clementine0.9_001853m.g	3513	11.9883	5.87062	7.30952	GO:0016020//membrane;GO:0030312//external encapsulating structure	GO:0003779//actin binding	GO:0007010//cytoskeleton organization	gi|225434156|ref|XP_002275001.1|/0/PREDICTED: formin-like protein 1-like [Vitis vinifera]
clementine0.9_001855m.g	4679	4.23826	1.76307	1.12353	GO:0005618//cell wall;GO:0016020//membrane	GO:0004672//protein kinase activity;GO:0016491//oxidoreductase activity	GO:0008152//metabolic process;GO:0009987//cellular process	gi|255538650|ref|XP_002510390.1|/0/lrr receptor protein kinase, putative [Ricinus communis]
clementine0.9_001857m.g	2969	5.71527	1.68173	8.10401	GO:0030684//preribosome;GO:0031461//cullin-RING ubiquitin ligase complex	-	GO:0042254//ribosome biogenesis	gi|255587831|ref|XP_002534411.1|/0/WD-repeat protein, putative [Ricinus communis]
clementine0.9_001863m.g	4244	6.40686	1.38111	2.23916	-	GO:0016881//acid-amino acid ligase activity	GO:0009267//cellular response to starvation;GO:0009639//response to red or far red light;GO:0015698//inorganic anion transport	gi|359496174|ref|XP_002267490.2|/0/PREDICTED: probable ubiquitin-conjugating enzyme E2 24-like [Vitis vinifera]
clementine0.9_001865m.g	2936	1.67118	0.001	0.001	-	GO:0000166//nucleotide binding;GO:0004672//protein kinase activity	-	gi|255549760|ref|XP_002515931.1|/0/Serine/threonine-protein kinase-transforming protein raf, putative [Ricinus communis]
clementine0.9_001869m.g	2762	3.47891	1.10038	1.24448	-	-	-	gi|24461863|gb|AAN62350.1|AF506028_17/0/NBS-LRR type disease resistance protein [Citrus trifoliata]
clementine0.9_001875m.g	3166	6.45741	4.73126	11.6231	GO:0016020//membrane	GO:0004497//monooxygenase activity	GO:0008152//metabolic process;GO:0043623//cellular protein complex assembly	gi|224143285|ref|XP_002324904.1|/0/predicted protein [Populus trichocarpa]
clementine0.9_001880m.g	2709	1.43388	0.001	0.522459	-	-	-	gi|24461865|gb|AAN62352.1|AF506028_19/0/NBS-LRR type disease resistance protein [Citrus trifoliata]
clementine0.9_001881m.g	3283	13.4509	5.7529	9.54605	GO:0042598//vesicular fraction;GO:0043231//intracellular membrane-bounded organelle;GO:0044444//cytoplasmic part	GO:0016814//hydrolase activity, acting on carbon-nitrogen (but not peptide) bonds, in cyclic amidines;GO:0019901//protein kinase binding	GO:0003006//developmental process involved in reproduction;GO:0009127//purine nucleoside monophosphate biosynthetic process;GO:0009725//response to hormone stimulus	gi|296086441|emb|CBI32030.3|/0/unnamed protein product [Vitis vinifera]
clementine0.9_001888m.g	3137	4.36646	10.1036	22.7522	-	GO:0005506//iron ion binding;GO:0008940//nitrate reductase activity;GO:0050662//coenzyme binding	GO:0042126//nitrate metabolic process	gi|347300846|gb|AEO72337.1|/0/nitrate reductase 1 [Vitis vinifera]
clementine0.9_001889m.g	3220	18.095	7.82062	8.10022	GO:0005618//cell wall;GO:0031090//organelle membrane;GO:0031410//cytoplasmic vesicle;GO:0043231//intracellular membrane-bounded organelle	GO:0015925;GO:0030246//carbohydrate binding;GO:0043167//ion binding	GO:0044238//primary metabolic process	gi|255554022|ref|XP_002518051.1|/0/beta-galactosidase, putative [Ricinus communis]//gi|84579373|dbj|BAE72075.1|/0/pear beta-galactosidase3 [Pyrus communis]
clementine0.9_001891m.g	2907	27.5683	13.218	20.7965	GO:0005576//extracellular region;GO:0005618//cell wall;GO:0043231//intracellular membrane-bounded organelle	GO:0004558//alpha-glucosidase activity;GO:0005488//binding	GO:0044238//primary metabolic process	gi|296089241|emb|CBI39013.3|/0/unnamed protein product [Vitis vinifera]
clementine0.9_001892m.g	3521	43.1992	24.5389	49.3276	GO:0044464//cell part	GO:0004871//signal transducer activity	GO:0003006//developmental process involved in reproduction	gi|255552957|ref|XP_002517521.1|/0/NMDA receptor-regulated protein, putative [Ricinus communis]
clementine0.9_001893m.g	3278	28.5021	30.1329	63.5318	-	GO:0046872//metal ion binding	-	gi|225432464|ref|XP_002277269.1|/0/PREDICTED: putative E3 ubiquitin-protein ligase RF298-like [Vitis vinifera]
clementine0.9_001894m.g	3566	13.9887	2.55686	4.36589	-	-	-	gi|224106353|ref|XP_002314139.1|/0/predicted protein [Populus trichocarpa]
clementine0.9_001904m.g	2814	6.97455	2.85441	6.96965	-	-	-	gi|297740840|emb|CBI31022.3|/0/unnamed protein product [Vitis vinifera]
clementine0.9_001909m.g	3943	45.9903	16.0766	39.8435	GO:0043231//intracellular membrane-bounded organelle	GO:0003676//nucleic acid binding;GO:0005515//protein binding	GO:0006351//transcription, DNA-dependent;GO:0009755//hormone-mediated signaling pathway	gi|302398563|gb|ADL36576.1|/0/ARF domain class transcription factor [Malus x domestica]
clementine0.9_001912m.g	3889	19.5032	7.70336	14.1415	-	GO:0000166//nucleotide binding;GO:0004674//protein serine/threonine kinase activity	GO:0003006//developmental process involved in reproduction;GO:0009886//post-embryonic morphogenesis	gi|255537505|ref|XP_002509819.1|/0/ATP binding protein, putative [Ricinus communis]
clementine0.9_001914m.g	3567	40.0057	11.0158	29.2489	GO:0043231//intracellular membrane-bounded organelle	GO:0001071//nucleic acid binding transcription factor activity;GO:0003676//nucleic acid binding	GO:0006351//transcription, DNA-dependent;GO:0009725//response to hormone stimulus;GO:0009791//post-embryonic development;GO:0050794//regulation of cellular process	gi|118486652|gb|ABK95163.1|/0/unknown [Populus trichocarpa]
clementine0.9_001916m.g	3097	4.95096	0.84116	0.979294	-	GO:0003723//RNA binding;GO:0008135//translation factor activity, nucleic acid binding	GO:0006305;GO:0006412//translation;GO:0016246//RNA interference;GO:0034645//cellular macromolecule biosynthetic process	gi|224129054|ref|XP_002320489.1|/0/argonaute protein group [Populus trichocarpa]
clementine0.9_001919m.g	2853	2.50804	0.228275	1.20479	-	GO:0000166//nucleotide binding;GO:0004674//protein serine/threonine kinase activity	-	gi|255545234|ref|XP_002513678.1|/0/ATP binding protein, putative [Ricinus communis]
clementine0.9_001920m.g	3536	4.62537	1.22788	4.74601	GO:0015630//microtubule cytoskeleton;GO:0016020//membrane;GO:0030312//external encapsulating structure;GO:0031410//cytoplasmic vesicle;GO:0031981//nuclear lumen	GO:0008092//cytoskeletal protein binding	GO:0007010//cytoskeleton organization	gi|296087325|emb|CBI33699.3|/0/unnamed protein product [Vitis vinifera]
clementine0.9_001925m.g	3492	39.9867	0.932515	1.73704	GO:0016020//membrane	GO:0004672//protein kinase activity;GO:0032559	GO:0006464//protein modification process	gi|255572945|ref|XP_002527403.1|/0/ATP binding protein, putative [Ricinus communis]
clementine0.9_001927m.g	3041	39.7992	0.5711	1.86168	-	GO:0016702//oxidoreductase activity, acting on single donors with incorporation of molecular oxygen, incorporation of two atoms of oxygen;GO:0046914//transition metal ion binding	GO:0006633//fatty acid biosynthetic process	gi|71999169|gb|AAZ57444.1|/0/lipoxygenase LOX1 [Populus deltoides]
clementine0.9_001929m.g	3600	37.3674	12.362	14.0411	GO:0009536//plastid	-	-	gi|297740159|emb|CBI30341.3|/0/unnamed protein product [Vitis vinifera]
clementine0.9_001930m.g	3250	4.59207	1.93711	5.41251	GO:0055028//cortical microtubule	GO:0015631//tubulin binding	GO:0000902//cell morphogenesis;GO:0050879//multicellular organismal movement	gi|357459403|ref|XP_003599982.1|/0/Microtubule-associated protein TORTIFOLIA1 [Medicago truncatula]
clementine0.9_001931m.g	3664	7.64424	2.78472	5.02168	GO:0005635//nuclear envelope;GO:0031224//intrinsic to membrane	GO:0015075//ion transmembrane transporter activity	GO:0006810//transport	gi|296084311|emb|CBI24699.3|/0/unnamed protein product [Vitis vinifera]
clementine0.9_001932m.g	2754	0.519641	1.34006	2.56961	-	-	-	gi|359485824|ref|XP_003633343.1|/0/PREDICTED: receptor-like protein 12-like [Vitis vinifera]
clementine0.9_001933m.g	2860	2.85932	0.455433	0.424178	-	GO:0003676//nucleic acid binding;GO:0003678//DNA helicase activity;GO:0032559	GO:0006259//DNA metabolic process	gi|255552113|ref|XP_002517101.1|/0/ATP-dependent helicase NAM7, putative [Ricinus communis]
clementine0.9_001939m.g	2869	2.56532	2.27002	6.06081	-	-	-	gi|255551759|ref|XP_002516925.1|/0/pentatricopeptide repeat-containing protein, putative [Ricinus communis]
clementine0.9_001942m.g	3516	4.01208	1.72881	2.12773	-	-	-	gi|24461866|gb|AAN62353.1|AF506028_20/0/NBS-LRR type disease resistance protein [Citrus trifoliata]
clementine0.9_001945m.g	3003	21.7853	8.53032	18.6504	-	-	GO:0006351//transcription, DNA-dependent	gi|359489534|ref|XP_002273779.2|/0/PREDICTED: uncharacterized protein LOC100260735 [Vitis vinifera]
clementine0.9_001948m.g	3503	18.1505	6.19725	8.77337	-	-	-	gi|296088651|emb|CBI37642.3|/0/unnamed protein product [Vitis vinifera]
clementine0.9_001957m.g	2946	5.20472	2.06331	5.35334	GO:0043231//intracellular membrane-bounded organelle	GO:0003676//nucleic acid binding;GO:0030528//transcription regulator activity;GO:0046914//transition metal ion binding	GO:0006351//transcription, DNA-dependent;GO:0009725//response to hormone stimulus;GO:0009845//seed germination;GO:0010431//seed maturation;GO:0034285	gi|255565913|ref|XP_002523945.1|/0/transcription factor, putative [Ricinus communis]
clementine0.9_001958m.g	3557	10.2882	3.35674	6.59382	-	GO:0003824//catalytic activity	GO:0050794//regulation of cellular process	gi|255545592|ref|XP_002513856.1|/0/electron transporter, putative [Ricinus communis]
clementine0.9_001961m.g	3993	7.2704	2.82711	4.3041	-	-	-	gi|224134406|ref|XP_002321815.1|/0/cc-nbs-lrr resistance protein [Populus trichocarpa]
clementine0.9_001963m.g	2832	7.36336	0.766559	1.14233	-	-	-	gi|24461866|gb|AAN62353.1|AF506028_20/0/NBS-LRR type disease resistance protein [Citrus trifoliata]
clementine0.9_001965m.g	3020	88.6816	16.6052	28.3872	GO:0009536//plastid;GO:0031224//intrinsic to membrane	GO:0008324//cation transmembrane transporter activity;GO:0015662//ATPase activity, coupled to transmembrane movement of ions, phosphorylative mechanism;GO:0032559	GO:0006811//ion transport;GO:0006996//organelle organization;GO:0009206;GO:0009207;GO:0009813//flavonoid biosynthetic process;GO:0051452//intracellular pH reduction	gi|224138528|ref|XP_002326625.1|/0/autoinhibited H+ ATPase [Populus trichocarpa]
clementine0.9_001974m.g	3592	7.74055	4.04928	8.89373	-	-	-	gi|297738252|emb|CBI27453.3|/0/unnamed protein product [Vitis vinifera]
clementine0.9_001976m.g	2872	2.13553	0.302353	0.422406	GO:0031224//intrinsic to membrane	GO:0004871//signal transducer activity;GO:0016301//kinase activity;GO:0016628//oxidoreductase activity, acting on the CH-CH group of donors, NAD or NADP as acceptor;GO:0032559	GO:0006464//protein modification process	gi|255571606|ref|XP_002526749.1|/0/Receptor protein kinase CLAVATA1 precursor, putative [Ricinus communis]
clementine0.9_001978m.g	3560	10.8538	5.97606	5.22518	-	-	-	gi|225440702|ref|XP_002274939.1|/0/PREDICTED: uncharacterized protein LOC100242503 [Vitis vinifera]//gi|297740202|emb|CBI30384.3|/0/unnamed protein product [Vitis vinifera]
clementine0.9_001979m.g	3416	8.37875	11.0578	19.7101	GO:0043231//intracellular membrane-bounded organelle	GO:0003676//nucleic acid binding;GO:0005488//binding;GO:0046914//transition metal ion binding	GO:0006351//transcription, DNA-dependent;GO:0009845//seed germination;GO:0010431//seed maturation;GO:0050789//regulation of biological process;GO:0050794//regulation of cellular process	gi|255575574|ref|XP_002528687.1|/0/transcription factor, putative [Ricinus communis]//gi|302398543|gb|ADL36566.1|/0/ABI3L domain class transcription factor [Malus x domestica]
clementine0.9_001983m.g	3056	7.15813	4.54638	3.37427	-	-	-	gi|24461861|gb|AAN62348.1|AF506028_15/0/NBS-LRR type disease resistance protein [Citrus trifoliata]
clementine0.9_001985m.g	3294	9.12353	3.75656	3.43738	-	GO:0004519//endonuclease activity	GO:0009657//plastid organization;GO:0044238//primary metabolic process	gi|357490525|ref|XP_003615550.1|/0/Ribonuclease E [Medicago truncatula]
clementine0.9_001986m.g	3742	45.8382	17.6944	27.0165	-	GO:0005488//binding	GO:0009693//ethylene biosynthetic process	gi|359495432|ref|XP_002280519.2|/0/PREDICTED: ETO1-like protein 1-like [Vitis vinifera]//gi|70780055|gb|AAZ08351.1|/0/ethylene overproducer-like 1 [Solanum lycopersicum]
clementine0.9_001987m.g	3034	4.31254	2.64743	1.53276	GO:0031224//intrinsic to membrane	GO:0015662//ATPase activity, coupled to transmembrane movement of ions, phosphorylative mechanism;GO:0032559;GO:0043169//cation binding	GO:0006811//ion transport;GO:0006818//hydrogen transport;GO:0006970//response to osmotic stress;GO:0009206;GO:0009207	gi|350535937|ref|NP_001234477.1|/0/plasma membrane H+-ATPase [Solanum lycopersicum]
clementine0.9_001988m.g	3490	3.92481	1.9283	5.15618	GO:0009536//plastid	-	-	gi|30686506|ref|NP_173402.2|/0/pentatricopeptide repeat-containing protein [Arabidopsis thaliana]
clementine0.9_001990m.g	2742	2.23678	1.58344	5.16171	-	-	-	gi|255572426|ref|XP_002527150.1|/0/pentatricopeptide repeat-containing protein, putative [Ricinus communis]
clementine0.9_001993m.g	3424	27.227	13.3145	21.7309	GO:0044424//intracellular part	GO:0005488//binding;GO:0019787//small conjugating protein ligase activity	GO:0000302//response to reactive oxygen species;GO:0009719;GO:0010260//organ senescence;GO:0032446//protein modification by small protein conjugation	gi|297741800|emb|CBI33105.3|/0/unnamed protein product [Vitis vinifera]
clementine0.9_001995m.g	3551	37.1921	14.3055	16.7402	GO:0044424//intracellular part	GO:0000166//nucleotide binding;GO:0004672//protein kinase activity	GO:0006464//protein modification process	gi|357507363|ref|XP_003623970.1|/0/U-box domain-containing protein [Medicago truncatula]
clementine0.9_002004m.g	3860	18.3256	6.80514	12.5191	-	-	-	gi|225447492|ref|XP_002267265.1|/0/PREDICTED: uncharacterized protein LOC100245992 [Vitis vinifera]
clementine0.9_002012m.g	3152	37.8139	12.8794	17.1914	-	-	-	gi|224083424|ref|XP_002307020.1|/3.29126e-145/predicted protein [Populus trichocarpa]//gi|224083424|ref|XP_002307020.1|/4.2738e-126/predicted protein [Populus trichocarpa]
clementine0.9_002013m.g	3789	7.44601	1.26048	2.98832	GO:0043234//protein complex;GO:0044424//intracellular part	GO:0004672//protein kinase activity;GO:0004871//signal transducer activity;GO:0019787//small conjugating protein ligase activity;GO:0032559	GO:0032446//protein modification by small protein conjugation	gi|297746091|emb|CBI16147.3|/0/unnamed protein product [Vitis vinifera]
clementine0.9_002014m.g	3942	19.604	12.6663	29.6466	GO:0043231//intracellular membrane-bounded organelle	GO:0019787//small conjugating protein ligase activity;GO:0042802//identical protein binding;GO:0046872//metal ion binding	GO:0000086//G2/M transition of mitotic cell cycle;GO:0003006//developmental process involved in reproduction;GO:0006513//protein monoubiquitination;GO:0009887//organ morphogenesis;GO:0016574//histone ubiquitination;GO:0040007//growth;GO:0040034//regulation of development, heterochronic;GO:0050832//defense response to fungus	gi|297734578|emb|CBI16629.3|/0/unnamed protein product [Vitis vinifera]
clementine0.9_002020m.g	2819	1.16036	0.0770094	0.0717246	-	GO:0004672//protein kinase activity	-	gi|359486510|ref|XP_002271317.2|/0/PREDICTED: probable LRR receptor-like serine/threonine-protein kinase At3g47570-like, partial [Vitis vinifera]
clementine0.9_002031m.g	3166	4.9722	2.67419	9.06861	GO:0031461//cullin-RING ubiquitin ligase complex	GO:0004683//calmodulin-dependent protein kinase activity	-	gi|317106757|dbj|BAJ53251.1|/0/JHL25H03.15 [Jatropha curcas]
clementine0.9_002037m.g	2783	6.83186	0.546039	1.74366	GO:0031224//intrinsic to membrane	GO:0000166//nucleotide binding;GO:0005249//voltage-gated potassium channel activity;GO:0046873//metal ion transmembrane transporter activity	GO:0006970//response to osmotic stress;GO:0030001//metal ion transport;GO:0048588//developmental cell growth	gi|255576976|ref|XP_002529373.1|/0/Potassium channel AKT1, putative [Ricinus communis]
clementine0.9_002039m.g	3232	6.70507	0.806025	2.69005	-	GO:0016790//thiolester hydrolase activity;GO:0019783//small conjugating protein-specific protease activity	GO:0019941//modification-dependent protein catabolic process	gi|255549649|ref|XP_002515876.1|/0/Ubiquitin carboxyl-terminal hydrolase, putative [Ricinus communis]
clementine0.9_002041m.g	2828	0.001	0.460586	1.21544	GO:0031224//intrinsic to membrane	GO:0005267//potassium channel activity	GO:0030001//metal ion transport	gi|255546613|ref|XP_002514366.1|/0/Potassium channel AKT6, putative [Ricinus communis]
clementine0.9_002042m.g	2951	19.7444	1.02991	0.753679	GO:0009536//plastid	GO:0016702//oxidoreductase activity, acting on single donors with incorporation of molecular oxygen, incorporation of two atoms of oxygen;GO:0046914//transition metal ion binding	GO:0006633//fatty acid biosynthetic process;GO:0048527//lateral root development	gi|255551451|ref|XP_002516771.1|/0/lipoxygenase, putative [Ricinus communis]
clementine0.9_002046m.g	2816	0.0726	1.23346	0.646209	GO:0016020//membrane	GO:0004888//transmembrane receptor activity;GO:0005216//ion channel activity	GO:0006810//transport	gi|224142293|ref|XP_002324493.1|/0/glutamate-gated kainate-type ion channel receptor subunit GluR5 [Populus trichocarpa]
clementine0.9_002047m.g	3013	7.39599	3.02614	5.50273	GO:0030684//preribosome;GO:0031981//nuclear lumen	GO:0004683//calmodulin-dependent protein kinase activity	GO:0003006//developmental process involved in reproduction;GO:0009790//embryo development;GO:0042254//ribosome biogenesis;GO:0044238//primary metabolic process;GO:0044260	gi|255558071|ref|XP_002520064.1|/0/U3 small nucleolar RNA-associated protein, putative [Ricinus communis]
clementine0.9_002048m.g	3542	6.81087	0.796771	1.25585	GO:0000151//ubiquitin ligase complex;GO:0015630//microtubule cytoskeleton;GO:0043231//intracellular membrane-bounded organelle	GO:0003824//catalytic activity;GO:0019899//enzyme binding	GO:0009553//embryo sac development;GO:0019941//modification-dependent protein catabolic process	gi|255562928|ref|XP_002522469.1|/0/E3 ubiquitin ligase apc2, putative [Ricinus communis]
clementine0.9_002054m.g	3128	11.6992	2.08206	1.29279	GO:0016020//membrane;GO:0016023//cytoplasmic membrane-bounded vesicle	GO:0004672//protein kinase activity;GO:0004871//signal transducer activity;GO:0032559;GO:0042802//identical protein binding	GO:0003006//developmental process involved in reproduction;GO:0006464//protein modification process;GO:0008356//asymmetric cell division;GO:0010102//lateral root morphogenesis	gi|255585507|ref|XP_002533445.1|/0/receptor protein kinase, putative [Ricinus communis]
clementine0.9_002056m.g	2643	8.19932	0.410688	3.97804	-	-	-	gi|224134406|ref|XP_002321815.1|/9.82029e-180/cc-nbs-lrr resistance protein [Populus trichocarpa]
clementine0.9_002060m.g	4120	31.3113	12.5933	20.121	GO:0043231//intracellular membrane-bounded organelle	GO:0019787//small conjugating protein ligase activity;GO:0046914//transition metal ion binding	GO:0002218//activation of innate immune response;GO:0002832;GO:0009408//response to heat;GO:0009409//response to cold;GO:0009414//response to water deprivation;GO:0009593//detection of chemical stimulus;GO:0009696//salicylic acid metabolic process;GO:0009738//abscisic acid mediated signaling pathway;GO:0009908//flower development;GO:0032446//protein modification by small protein conjugation;GO:00…	gi|255570825|ref|XP_002526365.1|/0/sumo ligase, putative [Ricinus communis]
clementine0.9_002061m.g	3622	8.80532	3.53625	4.5775	GO:0016020//membrane;GO:0043231//intracellular membrane-bounded organelle	GO:0004721//phosphoprotein phosphatase activity;GO:0008289//lipid binding	GO:0006351//transcription, DNA-dependent;GO:0009933//meristem structural organization;GO:0010073//meristem maintenance;GO:0048869	gi|255548189|ref|XP_002515151.1|/0/protein phosphatase 2c, putative [Ricinus communis]
clementine0.9_002062m.g	4915	25.7476	11.1305	22.2555	-	GO:0003676//nucleic acid binding;GO:0046914//transition metal ion binding	-	gi|255539831|ref|XP_002510980.1|/0/zinc finger protein, putative [Ricinus communis]
clementine0.9_002063m.g	3920	9.54408	4.04274	4.74531	-	-	-	gi|297738650|emb|CBI27895.3|/1.5005e-107/unnamed protein product [Vitis vinifera]//gi|297738650|emb|CBI27895.3|/8.77444e-96/unnamed protein product [Vitis vinifera]
clementine0.9_002064m.g	3746	21.7212	20.0515	48.7397	GO:0031227//intrinsic to endoplasmic reticulum membrane	GO:0019829//cation-transporting ATPase activity;GO:0032559	GO:0000041//transition metal ion transport;GO:0009206;GO:0010038//response to metal ion;GO:0030003//cellular cation homeostasis;GO:0070838//divalent metal ion transport	gi|224106565|ref|XP_002314209.1|/0/endoplasmic reticulum [ER]-type calcium ATPase [Populus trichocarpa]
clementine0.9_002067m.g	3522	30.4166	55.0429	24.8003	GO:0031981//nuclear lumen	-	GO:0009791//post-embryonic development;GO:0010051//xylem and phloem pattern formation;GO:0048507//meristem development;GO:0048827//phyllome development	gi|296090475|emb|CBI40671.3|/0/unnamed protein product [Vitis vinifera]
clementine0.9_002070m.g	3106	1.57972	0.97851	3.18976	GO:0009536//plastid	-	GO:0009314//response to radiation;GO:0009657//plastid organization	gi|297743367|emb|CBI36234.3|/0/unnamed protein product [Vitis vinifera]
clementine0.9_002077m.g	3106	66.8746	35.6457	32.7438	GO:0043231//intracellular membrane-bounded organelle	GO:0003723//RNA binding;GO:0008168//methyltransferase activity	GO:0003006//developmental process involved in reproduction;GO:0032259//methylation;GO:0040029//regulation of gene expression, epigenetic;GO:0044238//primary metabolic process	gi|255548445|ref|XP_002515279.1|/0/enhancer of zeste, ezh, putative [Ricinus communis]
clementine0.9_002081m.g	2870	4.13157	2.19359	5.0724	GO:0009536//plastid	GO:0004549//tRNA-specific ribonuclease activity;GO:0022857//transmembrane transporter activity	GO:0006399//tRNA metabolic process;GO:0006810//transport	gi|297738805|emb|CBI28050.3|/0/unnamed protein product [Vitis vinifera]
clementine0.9_002087m.g	3071	8.25488	2.26209	4.08202	GO:0009536//plastid;GO:0016020//membrane;GO:0031224//intrinsic to membrane	GO:0005488//binding;GO:0016723//oxidoreductase activity, oxidizing metal ions, NAD or NADP as acceptor;GO:0046914//transition metal ion binding;GO:0050662//coenzyme binding;GO:0050664//oxidoreductase activity, acting on NADH or NADPH, oxygen as acceptor	GO:0009314//response to radiation;GO:0022900//electron transport chain	gi|255556713|ref|XP_002519390.1|/1.54262e-123/ferric-chelate reductase, putative [Ricinus communis]//gi|255556713|ref|XP_002519390.1|/7.25269e-163/ferric-chelate reductase, putative [Ricinus communis]
clementine0.9_002090m.g	3291	16.7728	8.44347	22.3019	GO:0044464//cell part	-	GO:0044248//cellular catabolic process	gi|255583208|ref|XP_002532369.1|/0/conserved hypothetical protein [Ricinus communis]
clementine0.9_002092m.g	3116	12.0723	24.1056	25.8255	GO:0030529//ribonucleoprotein complex;GO:0043231//intracellular membrane-bounded organelle	GO:0005198//structural molecule activity;GO:0016787//hydrolase activity	GO:0010467//gene expression;GO:0019538//protein metabolic process	gi|255547740|ref|XP_002514927.1|/0/protein with unknown function [Ricinus communis]
clementine0.9_002093m.g	2839	0.432071	0.99407	2.27902	-	-	-	gi|24461866|gb|AAN62353.1|AF506028_20/0/NBS-LRR type disease resistance protein [Citrus trifoliata]
clementine0.9_002104m.g	3443	44.4748	17.7177	37.5843	GO:0005635//nuclear envelope;GO:0009536//plastid	GO:0022892	GO:0015031//protein transport	gi|302143924|emb|CBI23029.3|/0/unnamed protein product [Vitis vinifera]
clementine0.9_002105m.g	3174	11.4008	3.76179	3.69474	GO:0009536//plastid	GO:0016881//acid-amino acid ligase activity	GO:0043412//macromolecule modification	gi|255550449|ref|XP_002516275.1|/0/protein binding protein, putative [Ricinus communis]
clementine0.9_002109m.g	2616	4.45457	1.24478	2.396	-	-	-	gi|24461866|gb|AAN62353.1|AF506028_20/0/NBS-LRR type disease resistance protein [Citrus trifoliata]
clementine0.9_002110m.g	3536	28.2148	13.3225	15.3817	GO:0015630//microtubule cytoskeleton	GO:0003774//motor activity;GO:0032559	GO:0007017//microtubule-based process	gi|255579037|ref|XP_002530370.1|/0/kinesin heavy chain, putative [Ricinus communis]
clementine0.9_002113m.g	3560	20.2144	12.196	28.1705	GO:0005635//nuclear envelope;GO:0009536//plastid	GO:0022892	GO:0015031//protein transport	gi|255570599|ref|XP_002526256.1|/0/importin beta-1, putative [Ricinus communis]
clementine0.9_002115m.g	3387	3.07839	1.08961	0.955142	-	-	-	gi|302142589|emb|CBI19792.3|/0/unnamed protein product [Vitis vinifera]
clementine0.9_002116m.g	3868	27.6958	18.6333	13.6955	-	-	-	gi|255577121|ref|XP_002529444.1|/1.34836e-166/RNA binding protein, putative [Ricinus communis]//gi|255577121|ref|XP_002529444.1|/2.17996e-114/RNA binding protein, putative [Ricinus communis]//gi|255577121|ref|XP_002529444.1|/2.44116e-114/RNA binding protein, putative [Ricinus communis]//gi|255577121|ref|XP_002529444.1|/2.52563e-114/RNA binding protein, putative [Ricinus communis]//gi|255577121|re…
clementine0.9_002118m.g	3389	26.543	19.6015	41.9418	GO:0030119//AP-type membrane coat adaptor complex;GO:0030130//clathrin coat of trans-Golgi network vesicle	GO:0005515//protein binding;GO:0022892	GO:0015031//protein transport	gi|255560015|ref|XP_002521026.1|/0/AP-1 complex subunit gamma-2, putative [Ricinus communis]
clementine0.9_002119m.g	3064	20.8845	9.06901	6.79691	-	-	-	gi|255537601|ref|XP_002509867.1|/0/sumo ligase, putative [Ricinus communis]
clementine0.9_002122m.g	2979	7.61766	1.45747	1.35745	GO:0016020//membrane	-	GO:0007010//cytoskeleton organization;GO:0009658//chloroplast organization	gi|255539306|ref|XP_002510718.1|/0/conserved hypothetical protein [Ricinus communis]
clementine0.9_002123m.g	3341	40.1418	7.27747	7.14116	-	-	-	gi|255558081|ref|XP_002520069.1|/0/ATP binding protein, putative [Ricinus communis]
clementine0.9_002128m.g	2999	15.2701	2.24401	5.86551	-	-	-	gi|297743319|emb|CBI36186.3|/3.91345e-156/unnamed protein product [Vitis vinifera]
clementine0.9_002129m.g	2914	7.36663	4.17193	8.39574	-	-	-	gi|357478787|ref|XP_003609679.1|/0/Kelch-like protein diablo [Medicago truncatula]
clementine0.9_002130m.g	3172	16.5641	5.95422	9.68888	GO:0043231//intracellular membrane-bounded organelle;GO:0043232	GO:0003916//DNA topoisomerase activity	GO:0006261//DNA-dependent DNA replication	gi|255550676|ref|XP_002516387.1|/0/prokaryotic DNA topoisomerase, putative [Ricinus communis]
clementine0.9_002134m.g	3306	29.8067	11.5571	24.2801	-	-	-	gi|118486540|gb|ABK95109.1|/0/unknown [Populus trichocarpa]
clementine0.9_002139m.g	2685	9.89847	3.55752	5.79842	-	-	-	gi|359494712|ref|XP_003634825.1|/1.84544e-24/PREDICTED: uncharacterized protein LOC100853636 [Vitis vinifera]
clementine0.9_002149m.g	3363	27.5385	12.1358	17.8563	GO:0044444//cytoplasmic part	-	-	gi|255568157|ref|XP_002525054.1|/0/run and tbc1 domain containing 3, plant, putative [Ricinus communis]
clementine0.9_002150m.g	3927	48.9889	21.1727	44.0219	-	-	GO:0048438//floral whorl development	gi|255539545|ref|XP_002510837.1|/0/Transcriptional corepressor SEUSS, putative [Ricinus communis]
clementine0.9_002153m.g	3275	1.31092	0.530295	2.22256	-	GO:0015929//hexosaminidase activity	-	gi|225457148|ref|XP_002280399.1|/0/PREDICTED: alpha-N-acetylglucosaminidase-like [Vitis vinifera]//gi|255540793|ref|XP_002511461.1|/0/alpha-n-acetylglucosaminidase, putative [Ricinus communis]
clementine0.9_002154m.g	3343	7.09399	6.16916	20.1405	-	-	-	gi|296086604|emb|CBI32239.3|/0/unnamed protein product [Vitis vinifera]
clementine0.9_002155m.g	2997	1.22788	7.17112	12.5484	GO:0044424//intracellular part	GO:0008378//galactosyltransferase activity	GO:0009311//oligosaccharide metabolic process;GO:0009628//response to abiotic stimulus	gi|255548395|ref|XP_002515254.1|/0/Stachyose synthase precursor, putative [Ricinus communis]
clementine0.9_002158m.g	2595	3.15131	0.501941	1.79206	GO:0031090//organelle membrane	-	-	gi|357444799|ref|XP_003592677.1|/0/mscS family protein, putative [Medicago truncatula]
clementine0.9_002161m.g	3280	14.7721	6.68477	10.0479	GO:0043231//intracellular membrane-bounded organelle	GO:0003723//RNA binding	GO:0008380//RNA splicing;GO:0009653//anatomical structure morphogenesis;GO:0009725//response to hormone stimulus;GO:0035196//production of miRNAs involved in gene silencing by miRNA;GO:0048571	gi|255544958|ref|XP_002513540.1|/0/cap binding protein, putative [Ricinus communis]
clementine0.9_002162m.g	3464	49.1627	124.714	114.171	GO:0016020//membrane	-	-	gi|296084627|emb|CBI25715.3|/0/unnamed protein product [Vitis vinifera]
clementine0.9_002163m.g	3757	15.3454	6.41388	12.7009	-	GO:0019203//carbohydrate phosphatase activity;GO:0035251//UDP-glucosyltransferase activity	GO:0005991//trehalose metabolic process	gi|224074305|ref|XP_002304347.1|/0/predicted protein [Populus trichocarpa]
clementine0.9_002177m.g	2866	167.419	66.8842	78.4498	GO:0043231//intracellular membrane-bounded organelle;GO:0043234//protein complex;GO:0044444//cytoplasmic part	GO:0008135//translation factor activity, nucleic acid binding	GO:0006412//translation	gi|357445261|ref|XP_003592908.1|/0/Eukaryotic translation initiation factor 3 subunit C [Medicago truncatula]
clementine0.9_002191m.g	3304	5.32142	2.43109	3.91654	GO:0009536//plastid	GO:0001071//nucleic acid binding transcription factor activity;GO:0005488//binding;GO:0016620//oxidoreductase activity, acting on the aldehyde or oxo group of donors, NAD or NADP as acceptor;GO:0030528//transcription regulator activity	GO:0006631//fatty acid metabolic process;GO:0006970//response to osmotic stress;GO:0010017//red or far-red light signaling pathway;GO:0010467//gene expression	gi|225464796|ref|XP_002268998.1|/0/PREDICTED: protein FAR1-RELATED SEQUENCE 2-like [Vitis vinifera]//gi|42569554|ref|NP_180784.2|/0/FAR1-related protein [Arabidopsis thaliana]//gi|42571013|ref|NP_973580.1|/0/FAR1-related protein [Arabidopsis thaliana]
clementine0.9_002193m.g	3164	38.1874	17.4275	23.9639	-	-	-	gi|296085507|emb|CBI29239.3|/0/unnamed protein product [Vitis vinifera]
clementine0.9_002201m.g	3094	7.53275	10.244	18.3632	-	-	-	gi|297736863|emb|CBI26064.3|/0/unnamed protein product [Vitis vinifera]
clementine0.9_002205m.g	2707	1.81256	7.93936	13.2952	-	GO:0004672//protein kinase activity	-	gi|224115098|ref|XP_002316939.1|/0/predicted protein [Populus trichocarpa]
clementine0.9_002210m.g	4004	8.22055	3.63262	3.63581	-	-	GO:0009416//response to light stimulus	gi|359487094|ref|XP_002272915.2|/0/PREDICTED: protein FAR1-RELATED SEQUENCE 3-like [Vitis vinifera]
clementine0.9_002211m.g	2854	5.1576	1.82556	4.03816	GO:0000785//chromatin;GO:0043231//intracellular membrane-bounded organelle	GO:0003676//nucleic acid binding;GO:0046872//metal ion binding	GO:0006310//DNA recombination;GO:0007127//meiosis I;GO:0007276//gamete generation;GO:0048229//gametophyte development	gi|255557709|ref|XP_002519884.1|/0/replication factor A 1, rfa1, putative [Ricinus communis]
clementine0.9_002224m.g	3124	5.30082	3.12709	9.51414	GO:0016020//membrane;GO:0032300//mismatch repair complex;GO:0043231//intracellular membrane-bounded organelle	GO:0003690//double-stranded DNA binding;GO:0032559	GO:0006281//DNA repair;GO:0006915//apoptosis;GO:0010520//regulation of reciprocal meiotic recombination	gi|255541826|ref|XP_002511977.1|/0/DNA mismatch repair protein MSH2, putative [Ricinus communis]
clementine0.9_002225m.g	3385	15.703	4.23276	6.0329	-	-	-	gi|296085525|emb|CBI29257.3|/0/unnamed protein product [Vitis vinifera]
clementine0.9_002229m.g	3352	21.2248	1.68387	5.30813	GO:0044464//cell part	GO:0015925;GO:0030246//carbohydrate binding;GO:0043167//ion binding	GO:0044238//primary metabolic process	gi|57232107|gb|AAW47739.1|/0/beta-galactosidase [Prunus persica]
clementine0.9_002237m.g	3334	3.24997	1.49762	0.90968	-	GO:0003690//double-stranded DNA binding	GO:0006281//DNA repair	gi|255539477|ref|XP_002510803.1|/0/DNA mismatch repair protein MSH3, putative [Ricinus communis]
clementine0.9_002238m.g	3288	7.71008	2.11279	4.73502	GO:0016020//membrane;GO:0031410//cytoplasmic vesicle;GO:0043231//intracellular membrane-bounded organelle	GO:0004713//protein tyrosine kinase activity;GO:0016791//phosphatase activity;GO:0032559	GO:0006464//protein modification process;GO:0007167//enzyme linked receptor protein signaling pathway	gi|255584451|ref|XP_002532956.1|/0/ATP binding protein, putative [Ricinus communis]
clementine0.9_002239m.g	3735	5.03577	1.5112	2.81498	GO:0005819//spindle;GO:0044459//plasma membrane part	GO:0008092//cytoskeletal protein binding	GO:0000226//microtubule cytoskeleton organization	gi|255583160|ref|XP_002532346.1|/0/gamma-tubulin complex component, putative [Ricinus communis]
clementine0.9_002251m.g	3100	10.6178	2.31095	4.56562	GO:0043231//intracellular membrane-bounded organelle	GO:0001071//nucleic acid binding transcription factor activity;GO:0003677//DNA binding	GO:0003006//developmental process involved in reproduction;GO:0006351//transcription, DNA-dependent;GO:0009799//specification of symmetry;GO:0009933//meristem structural organization;GO:0009943//adaxial/abaxial axis specification	gi|60327627|gb|AAX19053.1|/0/class III HD-Zip protein 4 [Populus trichocarpa]
clementine0.9_002256m.g	2869	3.34916	1.05934	1.47997	GO:0043231//intracellular membrane-bounded organelle	GO:0004558//alpha-glucosidase activity;GO:0005488//binding	GO:0044238//primary metabolic process	gi|297739952|emb|CBI30134.3|/0/unnamed protein product [Vitis vinifera]
clementine0.9_002260m.g	4049	39.9391	27.0759	16.7786	-	-	-	gi|224092224|ref|XP_002309517.1|/1.05498e-58/predicted protein [Populus trichocarpa]//gi|224092224|ref|XP_002309517.1|/8.50115e-59/predicted protein [Populus trichocarpa]//gi|224092224|ref|XP_002309517.1|/8.77885e-59/predicted protein [Populus trichocarpa]//gi|224092224|ref|XP_002309517.1|/8.79632e-59/predicted protein [Populus trichocarpa]
clementine0.9_002261m.g	3716	13.4791	2.16155	4.35289	-	GO:0015925;GO:0030246//carbohydrate binding;GO:0043167//ion binding	GO:0044238//primary metabolic process	gi|255538780|ref|XP_002510455.1|/0/beta-galactosidase, putative [Ricinus communis]
clementine0.9_002265m.g	2550	1.60346	0.170266	0.475745	-	-	-	gi|297745275|emb|CBI40355.3|/3.37678e-52/unnamed protein product [Vitis vinifera]
clementine0.9_002271m.g	3826	10.7938	4.59599	9.7238	-	GO:0005488//binding	-	gi|255538080|ref|XP_002510105.1|/0/protein with unknown function [Ricinus communis]
clementine0.9_002272m.g	2740	7.83444	3.88226	11.1427	-	GO:0016791//phosphatase activity;GO:0032559	GO:0006950//response to stress;GO:0012501//programmed cell death	gi|255561034|ref|XP_002521529.1|/0/Disease resistance protein RGA2, putative [Ricinus communis]
clementine0.9_002273m.g	3170	7.48114	2.7393	4.33723	GO:0044464//cell part	GO:0015075//ion transmembrane transporter activity	GO:0006811//ion transport	gi|22325475|ref|NP_178539.2|/7.88506e-147/Cation efflux family protein [Arabidopsis thaliana]
clementine0.9_002280m.g	3383	6.40579	2.82351	3.70555	-	GO:0004721//phosphoprotein phosphatase activity	GO:0006796//phosphate metabolic process	gi|255586601|ref|XP_002533934.1|/0/phosphoprotein phosphatase, putative [Ricinus communis]
clementine0.9_002282m.g	3579	80.7712	27.2954	41.0146	GO:0043231//intracellular membrane-bounded organelle	GO:0001071//nucleic acid binding transcription factor activity;GO:0003676//nucleic acid binding;GO:0005515//protein binding	GO:0006355//regulation of transcription, DNA-dependent;GO:0008283//cell proliferation;GO:0009755//hormone-mediated signaling pathway;GO:0009900;GO:0009908//flower development;GO:0010260//organ senescence	gi|359386136|gb|AEV43357.1|/0/auxin-response factor [Citrus sinensis]
clementine0.9_002283m.g	3085	35.7855	41.8698	72.1598	GO:0009536//plastid	-	-	gi|296086616|emb|CBI32251.3|/0/unnamed protein product [Vitis vinifera]
clementine0.9_002290m.g	3555	38.6455	27.4186	18.8826	-	-	GO:0009987//cellular process	gi|297745547|emb|CBI40712.3|/0/unnamed protein product [Vitis vinifera]
clementine0.9_002292m.g	2906	5.06531	2.61464	5.77491	GO:0043231//intracellular membrane-bounded organelle	GO:0005488//binding	-	gi|255542648|ref|XP_002512387.1|/0/DNA polymerase zeta catalytic subunit, putative [Ricinus communis]
clementine0.9_002294m.g	3553	37.689	8.73735	18.9501	GO:0043231//intracellular membrane-bounded organelle	GO:0001071//nucleic acid binding transcription factor activity;GO:0003677//DNA binding	GO:0006351//transcription, DNA-dependent;GO:0009799//specification of symmetry;GO:0009933//meristem structural organization;GO:0009943//adaxial/abaxial axis specification;GO:0048869	gi|255578153|ref|XP_002529946.1|/0/DNA binding protein, putative [Ricinus communis]
clementine0.9_002296m.g	2681	2.44018	4.37256	10.6337	-	GO:0004672//protein kinase activity;GO:0005488//binding	-	gi|255555113|ref|XP_002518594.1|/0/Negative regulator of the PHO system, putative [Ricinus communis]
clementine0.9_002300m.g	3054	6.69422	1.84818	2.97925	-	GO:0004175//endopeptidase activity;GO:0032559;GO:0042623//ATPase activity, coupled	GO:0019538//protein metabolic process	gi|296088557|emb|CBI37548.3|/0/unnamed protein product [Vitis vinifera]
clementine0.9_002305m.g	2761	15.1054	8.01997	6.51758	-	GO:0003677//DNA binding	GO:0006259//DNA metabolic process	gi|302144008|emb|CBI23113.3|/0/unnamed protein product [Vitis vinifera]
clementine0.9_002308m.g	3195	191.708	93.9023	60.879	GO:0042598//vesicular fraction;GO:0043231//intracellular membrane-bounded organelle;GO:0044444//cytoplasmic part	GO:0016814//hydrolase activity, acting on carbon-nitrogen (but not peptide) bonds, in cyclic amidines;GO:0019901//protein kinase binding	GO:0003006//developmental process involved in reproduction;GO:0009127//purine nucleoside monophosphate biosynthetic process;GO:0009725//response to hormone stimulus	gi|296083176|emb|CBI22812.3|/0/unnamed protein product [Vitis vinifera]
clementine0.9_002319m.g	3205	178.097	64.4834	161.627	GO:0009536//plastid;GO:0031090//organelle membrane;GO:0031981//nuclear lumen	GO:0008135//translation factor activity, nucleic acid binding;GO:0017111//nucleoside-triphosphatase activity;GO:0032561//guanyl ribonucleotide binding;GO:0046914//transition metal ion binding	GO:0006412//translation;GO:0006950//response to stress;GO:0009207	gi|357966933|gb|AET97562.1|/0/elongation factor [Ziziphus jujuba]
clementine0.9_002323m.g	3094	8.5239	1.68395	1.89514	-	GO:0001071//nucleic acid binding transcription factor activity;GO:0003676//nucleic acid binding;GO:0005515//protein binding;GO:0032561//guanyl ribonucleotide binding;GO:0060229//lipase activator activity	GO:0006355//regulation of transcription, DNA-dependent;GO:0009725//response to hormone stimulus;GO:0010038//response to metal ion;GO:0010260//organ senescence	gi|269986107|gb|ACX68650.3|/0/auxin response factor [Dimocarpus longan]
clementine0.9_002327m.g	2668	3.21834	3.58019	11.4434	-	GO:0003676//nucleic acid binding;GO:0017111//nucleoside-triphosphatase activity;GO:0032559;GO:0046914//transition metal ion binding	-	gi|224089945|ref|XP_002308876.1|/0/chromatin remodeling complex subunit [Populus trichocarpa]
clementine0.9_002334m.g	2962	12.2858	5.93661	13.1745	GO:0043231//intracellular membrane-bounded organelle	GO:0005488//binding	GO:0007275//multicellular organismal development;GO:0009725//response to hormone stimulus;GO:0009987//cellular process	gi|46095227|gb|AAS80150.1|/0/ACT11D09.4 [Cucumis melo]
clementine0.9_002337m.g	3012	16.8332	33.9473	82.2326	GO:0009536//plastid	GO:0016758//transferase activity, transferring hexosyl groups;GO:0048037//cofactor binding	GO:0006950//response to stress;GO:0010038//response to metal ion;GO:0044238//primary metabolic process	gi|21063929|gb|AAM29154.1|/0/starch phosphorylase type H [Citrus hybrid cultivar]
clementine0.9_002339m.g	2826	15.8431	6.22231	10.8751	GO:0044464//cell part	GO:0004560//alpha-L-fucosidase activity	GO:0044238//primary metabolic process	gi|224103687|ref|XP_002313154.1|/0/predicted protein [Populus trichocarpa]
clementine0.9_002340m.g	2520	0.649021	4.13504	2.32681	-	GO:0035251//UDP-glucosyltransferase activity	GO:0005984//disaccharide metabolic process	gi|297738137|emb|CBI27338.3|/0/unnamed protein product [Vitis vinifera]
clementine0.9_002341m.g	4771	55.7918	17.7912	39.2432	GO:0044464//cell part	GO:0004620//phospholipase activity;GO:0035091//phosphatidylinositol binding;GO:0046872//metal ion binding	GO:0006650//glycerophospholipid metabolic process;GO:0010038//response to metal ion;GO:0042742//defense response to bacterium	gi|255541418|ref|XP_002511773.1|/0/phospholipase d beta, putative [Ricinus communis]
clementine0.9_002347m.g	3089	3.30919	1.26501	1.04729	-	-	-	gi|255544067|ref|XP_002513096.1|/1.19943e-103/conserved hypothetical protein [Ricinus communis]//gi|255544067|ref|XP_002513096.1|/5.74264e-102/conserved hypothetical protein [Ricinus communis]
clementine0.9_002348m.g	2625	2.41436	0.496205	0.231076	-	-	GO:0003006//developmental process involved in reproduction;GO:0007389//pattern specification process;GO:0009791//post-embryonic development;GO:0010074//maintenance of meristem identity;GO:0048367//shoot development;GO:0048646//anatomical structure formation involved in morphogenesis	gi|255577084|ref|XP_002529426.1|/0/bel1 homeotic protein, putative [Ricinus communis]
clementine0.9_002353m.g	3050	7.3733	2.49119	5.50226	-	-	-	gi|255581238|ref|XP_002531431.1|/0/pentatricopeptide repeat-containing protein, putative [Ricinus communis]
clementine0.9_002354m.g	3073	12.0416	18.3675	58.3612	GO:0009536//plastid	GO:0016758//transferase activity, transferring hexosyl groups;GO:0016798//hydrolase activity, acting on glycosyl bonds;GO:0043167//ion binding	GO:0009250//glucan biosynthetic process	gi|297740079|emb|CBI30261.3|/0/unnamed protein product [Vitis vinifera]
clementine0.9_002355m.g	3278	20.519	9.8677	9.74566	-	-	-	gi|224120502|ref|XP_002331063.1|/0/predicted protein [Populus trichocarpa]
clementine0.9_002359m.g	3191	2.62679	3.74175	6.77985	-	-	-	gi|15226909|ref|NP_181059.1|/6.9156e-50/DCD (Development and Cell Death) domain protein [Arabidopsis thaliana]
clementine0.9_002361m.g	3087	11.2585	53.657	77.6803	GO:0044464//cell part	GO:0032559;GO:0042623//ATPase activity, coupled	-	gi|255545124|ref|XP_002513623.1|/0/ATP binding protein, putative [Ricinus communis]
clementine0.9_002365m.g	3060	3.87503	2.27022	4.95568	-	GO:0016778	GO:0006163//purine nucleotide metabolic process	gi|297737338|emb|CBI26539.3|/0/unnamed protein product [Vitis vinifera]
clementine0.9_002370m.g	3100	10.0242	4.97205	6.06575	-	-	-	gi|356541446|ref|XP_003539187.1|/0/PREDICTED: uncharacterized protein LOC100801329 [Glycine max]
clementine0.9_002373m.g	3278	14.5941	8.94054	27.6333	-	GO:0008138//protein tyrosine/serine/threonine phosphatase activity	GO:0006464//protein modification process;GO:0006796//phosphate metabolic process;GO:0006970//response to osmotic stress;GO:0009411//response to UV	gi|297816818|ref|XP_002876292.1|/0/map kinase phosphatase [Arabidopsis lyrata subsp. lyrata]
clementine0.9_002376m.g	3238	46.596	9.58734	16.7973	GO:0043231//intracellular membrane-bounded organelle	GO:0001071//nucleic acid binding transcription factor activity;GO:0003676//nucleic acid binding;GO:0005488//binding;GO:0005515//protein binding	GO:0006351//transcription, DNA-dependent;GO:0009725//response to hormone stimulus;GO:0009755//hormone-mediated signaling pathway;GO:0009791//post-embryonic development;GO:0050794//regulation of cellular process	gi|118488187|gb|ABK95913.1|/0/unknown [Populus trichocarpa]//gi|255570473|ref|XP_002526195.1|/0/Auxin response factor, putative [Ricinus communis]
clementine0.9_002377m.g	3011	5.90714	2.23506	3.89476	-	-	-	gi|255582757|ref|XP_002532155.1|/0/synaptotagmin, putative [Ricinus communis]
clementine0.9_002380m.g	2889	3.60904	2.2543	5.45896	-	GO:0004672//protein kinase activity;GO:0005488//binding	-	gi|224115098|ref|XP_002316939.1|/0/predicted protein [Populus trichocarpa]//gi|302143131|emb|CBI20426.3|/0/unnamed protein product [Vitis vinifera]
clementine0.9_002390m.g	2697	10.1576	1.20739	2.54895	GO:0031224//intrinsic to membrane	GO:0000166//nucleotide binding;GO:0005249//voltage-gated potassium channel activity;GO:0005515//protein binding	GO:0006873//cellular ion homeostasis;GO:0009725//response to hormone stimulus;GO:0030001//metal ion transport	gi|255577304|ref|XP_002529533.1|/0/Potassium channel AKT2/3, putative [Ricinus communis]
clementine0.9_002392m.g	3274	0.999103	1.12722	3.7054	-	-	-	gi|297830924|ref|XP_002883344.1|/0/pentatricopeptide repeat-containing protein [Arabidopsis lyrata subsp. lyrata]
clementine0.9_002400m.g	2726	10.2746	13.2993	21.7323	GO:0044424//intracellular part	GO:0008168//methyltransferase activity	GO:0006364//rRNA processing;GO:0006730//one-carbon metabolic process	gi|255543715|ref|XP_002512920.1|/0/ribosomal RNA methyltransferase, putative [Ricinus communis]
clementine0.9_002403m.g	3468	16.0936	3.88107	8.22059	GO:0009536//plastid	GO:0005506//iron ion binding	GO:0003006//developmental process involved in reproduction;GO:0009725//response to hormone stimulus	gi|297734212|emb|CBI15459.3|/0/unnamed protein product [Vitis vinifera]
clementine0.9_002405m.g	2646	7.95823	1.39475	2.36884	GO:0031224//intrinsic to membrane	GO:0015299//solute:hydrogen antiporter activity	GO:0006811//ion transport	gi|255537655|ref|XP_002509894.1|/0/Na(+)/H(+) antiporter, putative [Ricinus communis]
clementine0.9_002409m.g	2787	64.2593	21.7323	31.4133	GO:0043231//intracellular membrane-bounded organelle	GO:0003676//nucleic acid binding	-	gi|297744010|emb|CBI36980.3|/1.09777e-120/unnamed protein product [Vitis vinifera]
clementine0.9_002413m.g	3810	31.8199	23.8172	54.1831	-	GO:0016788//hydrolase activity, acting on ester bonds	-	gi|255550313|ref|XP_002516207.1|/0/phosphoinositide 5-phosphatase, putative [Ricinus communis]
clementine0.9_002420m.g	3486	35.4225	17.6237	16.8783	GO:0043231//intracellular membrane-bounded organelle	GO:0001071//nucleic acid binding transcription factor activity;GO:0003677//DNA binding	GO:0003006//developmental process involved in reproduction;GO:0006351//transcription, DNA-dependent;GO:0009799//specification of symmetry;GO:0009887//organ morphogenesis;GO:0009933//meristem structural organization;GO:0009953//dorsal/ventral pattern formation;GO:0010073//meristem maintenance	gi|255549852|ref|XP_002515977.1|/0/DNA binding protein, putative [Ricinus communis]
clementine0.9_002423m.g	3199	1.34207	0.475032	0.0632046	-	GO:0003677//DNA binding	GO:0006351//transcription, DNA-dependent;GO:0009887//organ morphogenesis	gi|7239157|gb|AAF43095.1|AF053769_1/0/homeodomain protein [Malus x domestica]
clementine0.9_002434m.g	3137	117.764	27.4736	35.9652	GO:0005576//extracellular region	GO:0016462//pyrophosphatase activity;GO:0032559	GO:0006950//response to stress;GO:0012501//programmed cell death	gi|255538428|ref|XP_002510279.1|/0/leucine-rich repeat-containing protein, putative [Ricinus communis]
clementine0.9_002443m.g	3343	25.624	57.4057	31.3902	-	GO:0046872//metal ion binding	-	gi|255542832|ref|XP_002512479.1|/0/splicing factor, arginine/serine-rich 2,rnap interacting protein, putative [Ricinus communis]
clementine0.9_002449m.g	2742	3.13149	1.82095	5.67788	GO:0016020//membrane	GO:0000166//nucleotide binding;GO:0004672//protein kinase activity;GO:0030246//carbohydrate binding	GO:0009987//cellular process	gi|255567483|ref|XP_002524721.1|/0/S-locus-specific glycoprotein S6 precursor, putative [Ricinus communis]
clementine0.9_002454m.g	3405	48.6337	12.3049	19.0612	GO:0016020//membrane;GO:0043231//intracellular membrane-bounded organelle	GO:0004672//protein kinase activity;GO:0032559	GO:0000902//cell morphogenesis;GO:0001558//regulation of cell growth;GO:0006464//protein modification process;GO:0007275//multicellular organismal development;GO:0043401//steroid hormone mediated signaling pathway	gi|224054892|ref|XP_002298383.1|/0/predicted protein [Populus trichocarpa]
clementine0.9_002457m.g	3018	53.9894	24.9603	76.5085	GO:0009532//plastid stroma;GO:0009534//chloroplast thylakoid;GO:0009706//chloroplast inner membrane;GO:0030312//external encapsulating structure	GO:0003676//nucleic acid binding;GO:0016788//hydrolase activity, acting on ester bonds;GO:0032559;GO:0042623//ATPase activity, coupled	GO:0006281//DNA repair;GO:0006605//protein targeting;GO:0009657//plastid organization;GO:0015995//chlorophyll biosynthetic process;GO:0017038//protein import	gi|255540075|ref|XP_002511102.1|/0/ATP-dependent clp protease, putative [Ricinus communis]
clementine0.9_002458m.g	2853	3.36795	1.29356	2.97653	-	GO:0003824//catalytic activity	GO:0006768//biotin metabolic process	gi|297796671|ref|XP_002866220.1|/0/mitochondrial bifunctional diaminopelargonate synthetase [Arabidopsis lyrata subsp. lyrata]
clementine0.9_002459m.g	3340	40.521	20.149	44.3732	GO:0009526//plastid envelope;GO:0016020//membrane;GO:0042579//microbody	GO:0005543//phospholipid binding;GO:0017111//nucleoside-triphosphatase activity;GO:0032561//guanyl ribonucleotide binding	GO:0007005//mitochondrion organization;GO:0007031//peroxisome organization;GO:0007275//multicellular organismal development;GO:0009207;GO:0009657//plastid organization	gi|255584037|ref|XP_002532763.1|/0/dynamin, putative [Ricinus communis]
clementine0.9_002461m.g	2484	0.823033	0.524371	3.17451	-	-	-	gi|334187522|ref|NP_196448.2|/0/pentatricopeptide repeat-containing protein [Arabidopsis thaliana]
clementine0.9_002467m.g	2759	15.4869	6.84552	12.9713	-	-	-	gi|357445881|ref|XP_003593218.1|/7.97476e-148/Methyl binding domain protein [Medicago truncatula]
clementine0.9_002476m.g	2839	14.8344	6.04088	9.32973	-	GO:0000166//nucleotide binding;GO:0004672//protein kinase activity	GO:0009987//cellular process	gi|351721140|ref|NP_001235152.1|/0/S-locus lectin protein kinase family protein precursor [Glycine max]
clementine0.9_002478m.g	3348	10.503	3.89049	6.15996	-	-	-	gi|255586139|ref|XP_002533731.1|/0/pentatricopeptide repeat-containing protein, putative [Ricinus communis]
clementine0.9_002481m.g	4064	10.5138	4.86101	6.86576	-	-	-	gi|302141664|emb|CBI18867.3|/0/unnamed protein product [Vitis vinifera]//gi|302141664|emb|CBI18867.3|/4.48624e-167/unnamed protein product [Vitis vinifera]//gi|302141664|emb|CBI18867.3|/9.72706e-160/unnamed protein product [Vitis vinifera]
clementine0.9_002485m.g	3001	3.13372	1.08509	3.30136	-	-	-	gi|255581786|ref|XP_002531694.1|/0/pentatricopeptide repeat-containing protein, putative [Ricinus communis]
clementine0.9_002486m.g	3378	12.4069	6.68363	15.0237	GO:0031410//cytoplasmic vesicle	-	-	gi|377652303|dbj|BAL63045.1|/0/peptidyl serine alpha-galactosyltransferase [Nicotiana tabacum]
clementine0.9_002488m.g	2968	146.03	80.092	179.506	GO:0000325//plant-type vacuole;GO:0009536//plastid;GO:0016469//proton-transporting two-sector ATPase complex;GO:0031090//organelle membrane	GO:0003824//catalytic activity;GO:0015077//monovalent inorganic cation transmembrane transporter activity;GO:0015405	GO:0006754//ATP biosynthetic process;GO:0009651//response to salt stress;GO:0015988//energy coupled proton transport, against electrochemical gradient;GO:0031667//response to nutrient levels	gi|255543805|ref|XP_002512965.1|/0/vacuolar proton atpase, putative [Ricinus communis]
clementine0.9_002490m.g	3354	23.5894	12.2979	25.4397	-	-	-	gi|255538284|ref|XP_002510207.1|/0/fms interacting protein, putative [Ricinus communis]//gi|302142308|emb|CBI19511.3|/0/unnamed protein product [Vitis vinifera]
clementine0.9_002493m.g	2799	6.20848	1.62875	2.16711	GO:0043231//intracellular membrane-bounded organelle	GO:0001071//nucleic acid binding transcription factor activity;GO:0003677//DNA binding;GO:0042802//identical protein binding	GO:0003002//regionalization;GO:0051301//cell division	gi|224139438|ref|XP_002323112.1|/0/GRAS family transcription factor [Populus trichocarpa]
clementine0.9_002495m.g	3963	8.61512	2.13638	4.18363	GO:0043231//intracellular membrane-bounded organelle	GO:0004175//endopeptidase activity	GO:0006972//hyperosmotic response;GO:0019538//protein metabolic process	gi|255546473|ref|XP_002514296.1|/0/site-1 protease, putative [Ricinus communis]
clementine0.9_002500m.g	2954	7.33609	1.61678	8.3505	-	GO:0046914//transition metal ion binding	GO:0003006//developmental process involved in reproduction;GO:0006351//transcription, DNA-dependent	gi|297736096|emb|CBI24134.3|/0/unnamed protein product [Vitis vinifera]
clementine0.9_002507m.g	3143	11.2531	3.93704	5.98276	GO:0044464//cell part	GO:0004527//exonuclease activity;GO:0005488//binding	GO:0044237//cellular metabolic process	gi|296085897|emb|CBI31221.3|/0/unnamed protein product [Vitis vinifera]
clementine0.9_002512m.g	2724	9.90686	2.15177	3.4144	GO:0016020//membrane	GO:0000166//nucleotide binding;GO:0004672//protein kinase activity	GO:0000902//cell morphogenesis;GO:0001558//regulation of cell growth;GO:0007275//multicellular organismal development;GO:0043401//steroid hormone mediated signaling pathway	gi|255568229|ref|XP_002525090.1|/0/kinase, putative [Ricinus communis]
clementine0.9_002514m.g	2761	0.296185	0.786271	2.27017	GO:0043231//intracellular membrane-bounded organelle	GO:0000166//nucleotide binding;GO:0016887//ATPase activity	GO:0044237//cellular metabolic process	gi|224121142|ref|XP_002318509.1|/0/white-brown-complex ABC transporter family [Populus trichocarpa]
clementine0.9_002528m.g	3177	18.7903	9.70309	20.4928	GO:0016469//proton-transporting two-sector ATPase complex;GO:0030658//transport vesicle membrane	GO:0015077//monovalent inorganic cation transmembrane transporter activity;GO:0017111//nucleoside-triphosphatase activity	GO:0015988//energy coupled proton transport, against electrochemical gradient	gi|255582973|ref|XP_002532256.1|/0/vacuolar proton atpase, putative [Ricinus communis]
clementine0.9_002529m.g	2460	0.332425	1.32372	2.79452	-	GO:0016853//isomerase activity	-	gi|224066499|ref|XP_002302110.1|/0/copalyl diphosphate synthase [Populus trichocarpa]
clementine0.9_002531m.g	3327	7.80405	8.80886	15.801	-	-	-	gi|255585028|ref|XP_002533224.1|/0/wd40 protein, putative [Ricinus communis]
clementine0.9_002537m.g	3089	12.4425	5.62226	12.8947	-	GO:0004713//protein tyrosine kinase activity;GO:0032559	GO:0006464//protein modification process	gi|255575293|ref|XP_002528550.1|/0/protein kinase, putative [Ricinus communis]
clementine0.9_002541m.g	2813	7.77648	7.09998	19.4788	-	GO:0016846//carbon-sulfur lyase activity;GO:0048037//cofactor binding	-	gi|224063433|ref|XP_002301144.1|/0/predicted protein [Populus trichocarpa]
clementine0.9_002542m.g	3485	17.1297	19.9336	43.5713	GO:0009526//plastid envelope;GO:0031224//intrinsic to membrane	GO:0004175//endopeptidase activity;GO:0032559;GO:0042623//ATPase activity, coupled;GO:0046914//transition metal ion binding	GO:0009057//macromolecule catabolic process;GO:0019538//protein metabolic process	gi|255569271|ref|XP_002525603.1|/0/Cell division protein ftsH, putative [Ricinus communis]
clementine0.9_002545m.g	3279	23.1314	9.79849	18.5604	-	-	-	gi|302143964|emb|CBI23069.3|/0/unnamed protein product [Vitis vinifera]
clementine0.9_002550m.g	2451	12.9288	2.56858	13.199	-	GO:0003676//nucleic acid binding;GO:0017111//nucleoside-triphosphatase activity;GO:0032559	GO:0006970//response to osmotic stress	gi|297737012|emb|CBI26213.3|/0/unnamed protein product [Vitis vinifera]
clementine0.9_002555m.g	3523	32.5551	10.2906	19.6854	GO:0015630//microtubule cytoskeleton;GO:0016020//membrane;GO:0044431//Golgi apparatus part	GO:0003774//motor activity;GO:0032559	GO:0000904//cell morphogenesis involved in differentiation;GO:0007017//microtubule-based process	gi|255551765|ref|XP_002516928.1|/0/kif4, putative [Ricinus communis]
clementine0.9_002559m.g	2880	18.1726	10.7791	24.5719	-	GO:0005515//protein binding;GO:0030528//transcription regulator activity	GO:0009409//response to cold	gi|255556643|ref|XP_002519355.1|/0/calmodulin-binding transcription activator (camta), plants, putative [Ricinus communis]
clementine0.9_002560m.g	3421	12.1314	12.882	35.7574	-	-	-	gi|334184326|ref|NP_179622.5|/0/DENN (AEX-3) domain-containing protein [Arabidopsis thaliana]
clementine0.9_002566m.g	2541	7.80434	4.61347	3.81944	-	-	-	gi|45826061|gb|AAS77675.1|/9.62631e-108/resistance protein [Quercus suber]
clementine0.9_002567m.g	2452	6.42006	2.83314	9.23551	-	GO:0003676//nucleic acid binding;GO:0017111//nucleoside-triphosphatase activity;GO:0032559	-	gi|224136306|ref|XP_002326828.1|/0/chromatin remodeling complex subunit [Populus trichocarpa]
clementine0.9_002576m.g	3236	3.72746	1.8784	8.49755	GO:0043231//intracellular membrane-bounded organelle	GO:0003724//RNA helicase activity;GO:0032559	-	gi|255566773|ref|XP_002524370.1|/0/ATP-dependent RNA and DNA helicase, putative [Ricinus communis]
clementine0.9_002577m.g	2800	89.5892	26.5935	33.7949	GO:0009707//chloroplast outer membrane;GO:0031224//intrinsic to membrane	GO:0008320//protein transmembrane transporter activity	GO:0006605//protein targeting;GO:0009653//anatomical structure morphogenesis;GO:0009657//plastid organization	gi|255559014|ref|XP_002520530.1|/0/sorting and assembly machinery (sam50) protein, putative [Ricinus communis]
clementine0.9_002579m.g	2888	30.5813	9.09551	15.1224	-	-	-	gi|224096806|ref|XP_002310744.1|/0/cc-nbs-lrr resistance protein [Populus trichocarpa]
clementine0.9_002582m.g	2659	5.07452	2.12273	3.26974	-	-	-	gi|357494725|ref|XP_003617651.1|/2.97657e-176/PHD finger protein [Medicago truncatula]
clementine0.9_002585m.g	3540	15.0732	29.0066	30.3859	-	-	-	gi|225436962|ref|XP_002276508.1|/1.00828e-57/PREDICTED: uncharacterized protein LOC100264786 [Vitis vinifera]//gi|225436962|ref|XP_002276508.1|/1.40811e-81/PREDICTED: uncharacterized protein LOC100264786 [Vitis vinifera]//gi|225436962|ref|XP_002276508.1|/1.46397e-81/PREDICTED: uncharacterized protein LOC100264786 [Vitis vinifera]
clementine0.9_002586m.g	2515	5.1212	10.1855	10.5316	-	GO:0016627//oxidoreductase activity, acting on the CH-CH group of donors;GO:0050662//coenzyme binding	GO:0008152//metabolic process;GO:0048588//developmental cell growth	gi|255551833|ref|XP_002516962.1|/0/protein with unknown function [Ricinus communis]
clementine0.9_002588m.g	2981	49.1729	20.2452	37.1691	GO:0016020//membrane	GO:0032559;GO:0042623//ATPase activity, coupled	GO:0009987//cellular process	gi|224121826|ref|XP_002318682.1|/0/predicted protein [Populus trichocarpa]
clementine0.9_002589m.g	2900	74.4449	38.627	81.7133	GO:0031090//organelle membrane;GO:0031224//intrinsic to membrane;GO:0043231//intracellular membrane-bounded organelle	GO:0016787//hydrolase activity;GO:0032561//guanyl ribonucleotide binding	GO:0007010//cytoskeleton organization;GO:0009826//unidimensional cell growth;GO:0009913//epidermal cell differentiation;GO:0042546//cell wall biogenesis;GO:0048193//Golgi vesicle transport	gi|255572949|ref|XP_002527405.1|/0/Protein SEY1, putative [Ricinus communis]
clementine0.9_002590m.g	2883	17.0191	16.7919	37.6611	GO:0016020//membrane;GO:0043234//protein complex	GO:0019787//small conjugating protein ligase activity;GO:0033612//receptor serine/threonine kinase binding	GO:0009688//abscisic acid biosynthetic process;GO:0010260//organ senescence;GO:0015995//chlorophyll biosynthetic process;GO:0015996//chlorophyll catabolic process;GO:0032446//protein modification by small protein conjugation	gi|255539268|ref|XP_002510699.1|/0/ubiquitin-protein ligase, putative [Ricinus communis]
clementine0.9_002594m.g	3158	9.25748	11.8925	22.793	GO:0016020//membrane	-	-	gi|334186598|ref|NP_001154242.2|/0/uncharacterized protein [Arabidopsis thaliana]
clementine0.9_002596m.g	2683	0.990585	3.23652	6.55634	-	GO:0016740//transferase activity	-	gi|224115098|ref|XP_002316939.1|/0/predicted protein [Populus trichocarpa]
clementine0.9_002608m.g	2769	16.0216	7.1344	11.9752	-	GO:0004560//alpha-L-fucosidase activity	GO:0044238//primary metabolic process	gi|224103687|ref|XP_002313154.1|/0/predicted protein [Populus trichocarpa]
clementine0.9_002611m.g	2895	12.2877	16.8722	31.3589	-	GO:0008238//exopeptidase activity;GO:0016790//thiolester hydrolase activity;GO:0019783//small conjugating protein-specific protease activity;GO:0046914//transition metal ion binding	GO:0003006//developmental process involved in reproduction;GO:0019941//modification-dependent protein catabolic process;GO:0048588//developmental cell growth;GO:0070646	gi|302143104|emb|CBI20399.3|/0/unnamed protein product [Vitis vinifera]
clementine0.9_002612m.g	2430	0.925455	0.0893372	2.16337	-	-	-	gi|357507065|ref|XP_003623821.1|/0/Pentatricopeptide repeat-containing protein [Medicago truncatula]
clementine0.9_002616m.g	3028	7.62942	2.4376	3.13838	-	-	-	gi|296081481|emb|CBI20004.3|/0/unnamed protein product [Vitis vinifera]
clementine0.9_002617m.g	3067	35.329	45.0884	20.6345	GO:0043231//intracellular membrane-bounded organelle	GO:0032559;GO:0042623//ATPase activity, coupled	-	gi|357505253|ref|XP_003622915.1|/0/DEAD-box ATP-dependent RNA helicase [Medicago truncatula]
clementine0.9_002618m.g	3283	3.86091	1.12413	1.29334	GO:0043231//intracellular membrane-bounded organelle	GO:0001071//nucleic acid binding transcription factor activity;GO:0003676//nucleic acid binding;GO:0005515//protein binding	GO:0001708//cell fate specification;GO:0006351//transcription, DNA-dependent;GO:0009755//hormone-mediated signaling pathway;GO:0009791//post-embryonic development	gi|255570833|ref|XP_002526369.1|/0/Auxin response factor, putative [Ricinus communis]
clementine0.9_002624m.g	2682	4.95477	35.6959	71.7697	-	GO:0016301//kinase activity	-	gi|357485505|ref|XP_003613040.1|/0/U-box domain-containing protein [Medicago truncatula]
clementine0.9_002628m.g	2859	4.29048	4.10033	8.27437	GO:0043234//protein complex	GO:0016728;GO:0032559	GO:0006259//DNA metabolic process;GO:0009142//nucleoside triphosphate biosynthetic process;GO:0010038//response to metal ion	gi|4151068|emb|CAA71816.1|/0/ribonucleotide reductase [Nicotiana tabacum]
clementine0.9_002629m.g	3163	12.2807	5.69663	6.96772	GO:0005635//nuclear envelope	GO:0005488//binding	GO:0006605//protein targeting;GO:0009814//defense response, incompatible interaction	gi|15239202|ref|NP_196187.1|/0/nuclear pore complex protein-like protein [Arabidopsis thaliana]//gi|225448406|ref|XP_002271517.1|/0/PREDICTED: uncharacterized protein LOC100265724 [Vitis vinifera]
clementine0.9_002637m.g	2677	82.6319	157.485	167.071	GO:0016020//membrane;GO:0031981//nuclear lumen;GO:0044444//cytoplasmic part	GO:0032559;GO:0042623//ATPase activity, coupled	GO:0009987//cellular process;GO:0010038//response to metal ion	gi|351727028|ref|NP_001235099.1|/0/cell division cycle protein 48 homolog [Glycine max]
clementine0.9_002644m.g	3094	11.0348	3.50823	4.44377	GO:0009536//plastid;GO:0031981//nuclear lumen	GO:0016740//transferase activity	GO:0009987//cellular process	gi|255571202|ref|XP_002526551.1|/0/set domain protein, putative [Ricinus communis]//gi|297744207|emb|CBI37177.3|/2.05644e-153/unnamed protein product [Vitis vinifera]//gi|297744207|emb|CBI37177.3|/2.27741e-169/unnamed protein product [Vitis vinifera]
clementine0.9_002649m.g	2684	526.414	217.251	352.253	-	-	-	gi|6682841|dbj|BAA88904.1|/0/sucrose synthase [Citrus unshiu]
clementine0.9_002651m.g	3289	10.4427	7.0625	15.3073	-	GO:0005515//protein binding	-	gi|359473614|ref|XP_002271091.2|/0/PREDICTED: uncharacterized protein LOC100257476 [Vitis vinifera]
clementine0.9_002661m.g	2447	1.33676	5.05685	5.20559	-	-	-	gi|224096806|ref|XP_002310744.1|/0/cc-nbs-lrr resistance protein [Populus trichocarpa]
clementine0.9_002665m.g	2894	7.77075	4.05074	3.70289	-	GO:0005543//phospholipid binding	GO:0006629//lipid metabolic process;GO:0023052//signaling	gi|255545520|ref|XP_002513820.1|/0/Oxysterol-binding protein, putative [Ricinus communis]
clementine0.9_002681m.g	4270	27.3387	17.235	12.1694	-	-	-	gi|255553526|ref|XP_002517804.1|/0/protein binding protein, putative [Ricinus communis]
clementine0.9_002683m.g	2409	13.5785	5.40696	12.8416	GO:0009536//plastid;GO:0016020//membrane	GO:0005488//binding;GO:0016301//kinase activity	-	gi|297745064|emb|CBI38656.3|/0/unnamed protein product [Vitis vinifera]
clementine0.9_002686m.g	3342	61.6016	41.768	87.9068	GO:0043231//intracellular membrane-bounded organelle	GO:0008135//translation factor activity, nucleic acid binding	GO:0006412//translation	gi|309296913|gb|ADO64264.1|/0/eukaryotic initiation factor iso4G [Carica papaya]
clementine0.9_002690m.g	2828	4.26522	1.68882	4.00379	GO:0005634//nucleus	-	-	gi|255536971|ref|XP_002509552.1|/1.89668e-136/Sister chromatid cohesion 1 protein, putative [Ricinus communis]//gi|255536971|ref|XP_002509552.1|/3.53159e-118/Sister chromatid cohesion 1 protein, putative [Ricinus communis]
clementine0.9_002699m.g	2845	21.7736	24.2652	49.393	GO:0030312//external encapsulating structure;GO:0043231//intracellular membrane-bounded organelle	GO:0005515//protein binding;GO:0032559	GO:0044267//cellular protein metabolic process;GO:0050896//response to stimulus	gi|296085007|emb|CBI28422.3|/0/unnamed protein product [Vitis vinifera]
clementine0.9_002702m.g	2406	6.62778	1.71434	5.79851	GO:0031224//intrinsic to membrane	GO:0015299//solute:hydrogen antiporter activity	GO:0006811//ion transport	gi|255537657|ref|XP_002509895.1|/0/Na(+)/H(+) antiporter, putative [Ricinus communis]
clementine0.9_002707m.g	2944	21.9441	3.68698	4.46415	-	-	GO:0006629//lipid metabolic process	gi|255547970|ref|XP_002515042.1|/0/Oxysterol-binding protein, putative [Ricinus communis]
clementine0.9_002712m.g	2918	8.54759	2.45509	5.05825	-	-	-	gi|296084500|emb|CBI25059.3|/0/unnamed protein product [Vitis vinifera]//gi|296084500|emb|CBI25059.3|/1.87888e-179/unnamed protein product [Vitis vinifera]
clementine0.9_002714m.g	3770	4.50097	6.10384	9.06376	GO:0016020//membrane;GO:0044444//cytoplasmic part	GO:0000166//nucleotide binding;GO:0004674//protein serine/threonine kinase activity	-	gi|255538590|ref|XP_002510360.1|/0/kinase, putative [Ricinus communis]
clementine0.9_002716m.g	3491	29.2227	11.0068	16.2749	-	-	-	gi|255585908|ref|XP_002533627.1|/0/nucleotide binding protein, putative [Ricinus communis]
clementine0.9_002718m.g	3246	7.36896	5.35033	13.2677	-	-	-	gi|255550475|ref|XP_002516288.1|/0/suppression of tumorigenicity, putative [Ricinus communis]//gi|297738574|emb|CBI27819.3|/0/unnamed protein product [Vitis vinifera]
clementine0.9_002719m.g	2569	1.51202	0.0845035	0.314818	GO:0043231//intracellular membrane-bounded organelle	GO:0001071//nucleic acid binding transcription factor activity;GO:0003677//DNA binding;GO:0030528//transcription regulator activity	GO:0006351//transcription, DNA-dependent;GO:0006950//response to stress;GO:0009755//hormone-mediated signaling pathway	gi|255555881|ref|XP_002518976.1|/0/homeobox protein, putative [Ricinus communis]
clementine0.9_002721m.g	2516	3.65654	0.345134	1.20543	-	-	-	gi|297741535|emb|CBI32667.3|/1.82094e-167/unnamed protein product [Vitis vinifera]
clementine0.9_002738m.g	2756	5.341	0.236309	0.586913	-	-	-	gi|224113403|ref|XP_002316485.1|/0/predicted protein [Populus trichocarpa]
clementine0.9_002741m.g	2953	68.0549	22.7896	41.9036	GO:0043231//intracellular membrane-bounded organelle	-	-	gi|255550522|ref|XP_002516311.1|/0/ATP binding protein, putative [Ricinus communis]
clementine0.9_002747m.g	2930	19.9557	5.92736	18.0109	GO:0043231//intracellular membrane-bounded organelle	-	GO:0022613//ribonucleoprotein complex biogenesis	gi|255539194|ref|XP_002510662.1|/0/ribosome biogenesis protein tsr1, putative [Ricinus communis]
clementine0.9_002752m.g	3166	5.29507	15.6337	28.4831	GO:0016020//membrane	GO:0005253//anion channel activity;GO:0005488//binding	GO:0015698//inorganic anion transport	gi|224120342|ref|XP_002331024.1|/0/Cl-channel clc-7 [Populus trichocarpa]
clementine0.9_002756m.g	3790	52.0544	18.9023	35.5302	-	GO:0003677//DNA binding	GO:0007275//multicellular organismal development;GO:0008361//regulation of cell size;GO:0009414//response to water deprivation;GO:0048523//negative regulation of cellular process;GO:0048856//anatomical structure development	gi|354832293|gb|AER42647.1|/6.59976e-172/GTL1 [Populus tremula x Populus alba]
clementine0.9_002766m.g	3250	0.37743	1.13555	2.61294	-	-	-	gi|224118294|ref|XP_002317783.1|/0/predicted protein [Populus trichocarpa]
clementine0.9_002770m.g	2860	40.8883	19.8872	23.2591	GO:0044424//intracellular part	GO:0008172//S-methyltransferase activity;GO:0046914//transition metal ion binding	GO:0000097//sulfur amino acid biosynthetic process;GO:0006730//one-carbon metabolic process	gi|255549601|ref|XP_002515852.1|/0/5-methyltetrahydropteroyltriglutamate--homocysteine methyltransferase, putative [Ricinus communis]
clementine0.9_002772m.g	3070	13.2521	33.2352	32.2058	-	-	-	gi|224074675|ref|XP_002304419.1|/0/GRAS family transcription factor [Populus trichocarpa]
clementine0.9_002773m.g	3162	101.574	37.4174	36.9598	-	-	-	gi|225465743|ref|XP_002264820.1|/0/PREDICTED: uncharacterized protein LOC100255521 [Vitis vinifera]
clementine0.9_002774m.g	2995	1.2287	0.434904	0.135019	GO:0009536//plastid;GO:0016020//membrane	GO:0005451//monovalent cation:hydrogen antiporter activity;GO:0046873//metal ion transmembrane transporter activity	GO:0006812//cation transport	gi|255554533|ref|XP_002518305.1|/0/Glutathione-regulated potassium-efflux system protein kefB, putative [Ricinus communis]
clementine0.9_002775m.g	2841	16.0473	7.87055	13.2375	-	-	-	gi|255555221|ref|XP_002518647.1|/0/nucleotide binding protein, putative [Ricinus communis]
clementine0.9_002782m.g	3492	44.0849	17.1583	38.157	-	-	-	gi|224115390|ref|XP_002317021.1|/0/predicted protein [Populus trichocarpa]
clementine0.9_002784m.g	2588	18.564	4.86522	12.5784	GO:0005576//extracellular region;GO:0009532//plastid stroma;GO:0031090//organelle membrane;GO:0042579//microbody	GO:0008172//S-methyltransferase activity;GO:0046914//transition metal ion binding	GO:0000097//sulfur amino acid biosynthetic process;GO:0006730//one-carbon metabolic process;GO:0006970//response to osmotic stress;GO:0010038//response to metal ion	gi|255569484|ref|XP_002525709.1|/0/5-methyltetrahydropteroyltriglutamate--homocysteine methyltransferase, putative [Ricinus communis]
clementine0.9_002791m.g	2899	5.57119	3.96887	9.62485	-	-	-	gi|296082211|emb|CBI21216.3|/5.99697e-61/unnamed protein product [Vitis vinifera]
clementine0.9_002797m.g	4303	7.36426	2.77479	6.48442	-	-	-	gi|145360312|ref|NP_565594.3|/1.19581e-162/transducin family protein / WD-40 repeat family protein [Arabidopsis thaliana]//gi|145360312|ref|NP_565594.3|/2.27759e-141/transducin family protein / WD-40 repeat family protein [Arabidopsis thaliana]//gi|145360312|ref|NP_565594.3|/3.35717e-158/transducin family protein / WD-40 repeat family protein [Arabidopsis thaliana]//gi|145360312|ref|NP_565594.3|/…
clementine0.9_002802m.g	2541	11.9881	3.58826	9.23031	-	-	-	gi|147839260|emb|CAN67961.1|/6.59316e-32/hypothetical protein VITISV_033801 [Vitis vinifera]
clementine0.9_002807m.g	2370	1.46646	7.32792	21.5842	GO:0044424//intracellular part	GO:0003723//RNA binding	-	gi|22330712|ref|NP_177940.2|/2.82349e-138/pumilio 7 [Arabidopsis thaliana]
clementine0.9_002813m.g	2420	8.19456	1.88383	4.34461	GO:0009532//plastid stroma	GO:0016616//oxidoreductase activity, acting on the CH-OH group of donors, NAD or NADP as acceptor;GO:0016774//phosphotransferase activity, carboxyl group as acceptor;GO:0031406//carboxylic acid binding;GO:0032559	GO:0000097//sulfur amino acid biosynthetic process;GO:0006796//phosphate metabolic process	gi|297740938|emb|CBI31250.3|/0/unnamed protein product [Vitis vinifera]
clementine0.9_002816m.g	2808	3.13069	5.5664	13.465	GO:0009536//plastid	GO:0004672//protein kinase activity;GO:0008378//galactosyltransferase activity;GO:0032559	GO:0005985//sucrose metabolic process;GO:0006464//protein modification process;GO:0006950//response to stress;GO:0009312//oligosaccharide biosynthetic process;GO:0009725//response to hormone stimulus;GO:0019406;GO:0023052//signaling	gi|255567355|ref|XP_002524657.1|/0/Stachyose synthase precursor, putative [Ricinus communis]
clementine0.9_002823m.g	3650	12.1545	5.17446	12.1315	-	GO:0003723//RNA binding;GO:0016791//phosphatase activity	GO:0006796//phosphate metabolic process;GO:0006950//response to stress;GO:0009755//hormone-mediated signaling pathway;GO:0040007//growth	gi|297740221|emb|CBI30403.3|/0/unnamed protein product [Vitis vinifera]
clementine0.9_002824m.g	3912	28.325	12.264	14.4201	-	-	-	gi|255571608|ref|XP_002526750.1|/0/conserved hypothetical protein [Ricinus communis]
clementine0.9_002825m.g	2799	8.98403	3.95554	7.51266	GO:0009532//plastid stroma	GO:0005083//small GTPase regulator activity;GO:0008483//transaminase activity;GO:0046914//transition metal ion binding	GO:0009085//lysine biosynthetic process;GO:0009627//systemic acquired resistance;GO:0032012//regulation of ARF protein signal transduction	gi|255555567|ref|XP_002518820.1|/0/gcn4-complementing protein, putative [Ricinus communis]//gi|297738263|emb|CBI27464.3|/0/unnamed protein product [Vitis vinifera]
clementine0.9_002827m.g	2752	4.4573	2.60318	6.39196	GO:0009536//plastid	GO:0004518//nuclease activity	GO:0000398//nuclear mRNA splicing, via spliceosome;GO:0043623//cellular protein complex assembly	gi|255561657|ref|XP_002521838.1|/0/pentatricopeptide repeat-containing protein, putative [Ricinus communis]
clementine0.9_002831m.g	2569	3.74027	0.676028	2.75465	-	-	-	gi|255546727|ref|XP_002514422.1|/0/pentatricopeptide repeat-containing protein, putative [Ricinus communis]
clementine0.9_002833m.g	2770	72.7723	34.4052	40.0004	GO:0043231//intracellular membrane-bounded organelle	GO:0003676//nucleic acid binding;GO:0032559;GO:0042623//ATPase activity, coupled	-	gi|255582203|ref|XP_002531894.1|/0/dead box ATP-dependent RNA helicase, putative [Ricinus communis]
clementine0.9_002834m.g	2405	2.38019	0.541595	1.34514	-	-	-	gi|255580288|ref|XP_002530973.1|/3.68233e-85/phosphatidylinositol n-acetylglucosaminyltransferase subunit p, putative [Ricinus communis]
clementine0.9_002838m.g	2666	19.6313	15.1458	30.7914	GO:0031981//nuclear lumen	GO:0003676//nucleic acid binding	-	gi|297742925|emb|CBI35792.3|/0/unnamed protein product [Vitis vinifera]
clementine0.9_002839m.g	3713	4.29476	1.05241	2.39602	GO:0031410//cytoplasmic vesicle	GO:0004672//protein kinase activity;GO:0016628//oxidoreductase activity, acting on the CH-CH group of donors, NAD or NADP as acceptor;GO:0032559	GO:0006464//protein modification process;GO:0007167//enzyme linked receptor protein signaling pathway	gi|255569464|ref|XP_002525699.1|/0/leucine-rich repeat protein, putative [Ricinus communis]
clementine0.9_002841m.g	2615	1.25088	3.07163	5.18043	GO:0016020//membrane	GO:0046914//transition metal ion binding;GO:0070011	GO:0019538//protein metabolic process;GO:0060918//auxin transport	gi|297743057|emb|CBI35924.3|/0/unnamed protein product [Vitis vinifera]
clementine0.9_002844m.g	2646	13.5985	23.2186	36.7552	GO:0016020//membrane;GO:0031410//cytoplasmic vesicle	GO:0016307//phosphatidylinositol phosphate kinase activity;GO:0032559	GO:0006796//phosphate metabolic process;GO:0046488//phosphatidylinositol metabolic process	gi|255576804|ref|XP_002529289.1|/0/phosphatidylinositol-4-phosphate 5-kinase, putative [Ricinus communis]
clementine0.9_002847m.g	2804	116.73	23.7684	29.4923	GO:0016020//membrane	-	-	gi|302398613|gb|ADL36601.1|/0/BZIP domain class transcription factor [Malus x domestica]
clementine0.9_002849m.g	3060	18.9743	7.80387	12.1579	-	GO:0005515//protein binding;GO:0017111//nucleoside-triphosphatase activity	-	gi|297738362|emb|CBI27563.3|/0/unnamed protein product [Vitis vinifera]
clementine0.9_002854m.g	2815	21.0615	8.71443	5.60247	-	-	-	gi|224138270|ref|XP_002322772.1|/0/predicted protein [Populus trichocarpa]
clementine0.9_002859m.g	3611	2.0948	0.961903	3.86353	-	-	-	gi|296085227|emb|CBI28722.3|/0/unnamed protein product [Vitis vinifera]
clementine0.9_002864m.g	2924	35.0291	6.31074	8.36703	GO:0000325//plant-type vacuole;GO:0031224//intrinsic to membrane	GO:0005254//chloride channel activity;GO:0015078//hydrogen ion transmembrane transporter activity;GO:0015103//inorganic anion transmembrane transporter activity	GO:0010035//response to inorganic substance;GO:0015698//inorganic anion transport	gi|255536929|ref|XP_002509531.1|/0/chloride channel clc, putative [Ricinus communis]
clementine0.9_002866m.g	3126	14.4535	6.8752	15.9761	-	GO:0004674//protein serine/threonine kinase activity;GO:0004871//signal transducer activity	GO:0044238//primary metabolic process;GO:0044260	gi|255556394|ref|XP_002519231.1|/0/map3k delta-1 protein kinase, putative [Ricinus communis]
clementine0.9_002867m.g	2869	2.56532	0.302669	0.77522	-	-	-	gi|255552089|ref|XP_002517089.1|/0/tso1, putative [Ricinus communis]
clementine0.9_002869m.g	3774	4.76705	2.70355	5.89324	-	GO:0046914//transition metal ion binding	-	gi|224089543|ref|XP_002308750.1|/0/predicted protein [Populus trichocarpa]//gi|224124726|ref|XP_002329933.1|/0/predicted protein [Populus trichocarpa]
clementine0.9_002870m.g	3039	52.6072	125.082	83.0323	GO:0031410//cytoplasmic vesicle	GO:0046873//metal ion transmembrane transporter activity	GO:0030001//metal ion transport;GO:0034220//ion transmembrane transport;GO:0050896//response to stimulus	gi|255543489|ref|XP_002512807.1|/0/Potassium transporter, putative [Ricinus communis]
clementine0.9_002885m.g	2617	13.7492	3.06928	2.39509	GO:0031410//cytoplasmic vesicle	GO:0004175//endopeptidase activity;GO:0005515//protein binding	GO:0019538//protein metabolic process;GO:0044092//negative regulation of molecular function	gi|255543843|ref|XP_002512984.1|/0/Xylem serine proteinase 1 precursor, putative [Ricinus communis]
clementine0.9_002887m.g	2867	55.9772	13.8568	32.4409	GO:0009532//plastid stroma	GO:0003676//nucleic acid binding;GO:0032559;GO:0042623//ATPase activity, coupled;GO:0046914//transition metal ion binding	GO:0003006//developmental process involved in reproduction	gi|255543078|ref|XP_002512602.1|/0/dead box ATP-dependent RNA helicase, putative [Ricinus communis]
clementine0.9_002890m.g	2535	83.1476	19.2683	9.65096	-	GO:0016899//oxidoreductase activity, acting on the CH-OH group of donors, oxygen as acceptor;GO:0050662//coenzyme binding	GO:0006950//response to stress;GO:0044281//small molecule metabolic process	gi|357517451|ref|XP_003629014.1|/0/GMC-type oxidoreductase, putative [Medicago truncatula]
clementine0.9_002901m.g	2835	10.8891	6.12598	4.70711	-	-	-	gi|255545034|ref|XP_002513578.1|/0/heat shock protein binding protein, putative [Ricinus communis]
clementine0.9_002905m.g	2908	2.10909	4.18054	6.81388	GO:0043231//intracellular membrane-bounded organelle	GO:0005488//binding	GO:0048528//post-embryonic root development	gi|255539887|ref|XP_002511008.1|/0/ubiquitin-protein ligase, putative [Ricinus communis]
clementine0.9_002906m.g	2455	2.08189	5.04037	20.3427	GO:0009536//plastid	GO:0004672//protein kinase activity;GO:0008378//galactosyltransferase activity	GO:0005985//sucrose metabolic process;GO:0006950//response to stress;GO:0009312//oligosaccharide biosynthetic process;GO:0009725//response to hormone stimulus;GO:0019406	gi|187610414|gb|ACD13461.1|/0/raffionse synthase 2 [Glycine max]
clementine0.9_002907m.g	2415	0.001	1.07871	1.25585	-	GO:0000166//nucleotide binding;GO:0004672//protein kinase activity	GO:0044238//primary metabolic process;GO:0044260	gi|255583185|ref|XP_002532358.1|/0/BRASSINOSTEROID INSENSITIVE 1-associated receptor kinase 1 precursor, putative [Ricinus communis]
clementine0.9_002908m.g	2792	111.447	5.28728	9.41437	GO:0031410//cytoplasmic vesicle	GO:0004175//endopeptidase activity;GO:0005515//protein binding;GO:0070011	GO:0019538//protein metabolic process;GO:0044092//negative regulation of molecular function	gi|13430434|gb|AAK25839.1|AF360129_1/0/putative subtilisin serine protease [Arabidopsis thaliana]//gi|224074095|ref|XP_002304250.1|/0/predicted protein [Populus trichocarpa]
clementine0.9_002910m.g	2542	5.46893	0.512406	1.27265	GO:0031410//cytoplasmic vesicle	GO:0004175//endopeptidase activity;GO:0005515//protein binding	GO:0019538//protein metabolic process;GO:0044092//negative regulation of molecular function	gi|255555807|ref|XP_002518939.1|/0/Cucumisin precursor, putative [Ricinus communis]
clementine0.9_002914m.g	2715	3.08733	46.4564	70.0782	GO:0005576//extracellular region;GO:0005618//cell wall	GO:0015926//glucosidase activity	GO:0003006//developmental process involved in reproduction;GO:0044238//primary metabolic process	gi|183579871|dbj|BAG28345.1|/0/arabinofuranosidase [Citrus unshiu]
clementine0.9_002918m.g	2656	10.3914	4.74066	13.9311	GO:0043231//intracellular membrane-bounded organelle	-	GO:0003006//developmental process involved in reproduction	gi|22328051|ref|NP_201244.2|/1.81602e-149/HEN4 isoform 2 [Arabidopsis thaliana]//gi|357445989|ref|XP_003593272.1|/4.88743e-141/Heterogeneous nuclear ribonucleoprotein K [Medicago truncatula]
clementine0.9_002919m.g	2571	3.33977	0.253313	1.02236	GO:0031410//cytoplasmic vesicle	GO:0004175//endopeptidase activity;GO:0005515//protein binding;GO:0016628//oxidoreductase activity, acting on the CH-CH group of donors, NAD or NADP as acceptor	GO:0019538//protein metabolic process;GO:0044092//negative regulation of molecular function	gi|255562582|ref|XP_002522297.1|/0/Xylem serine proteinase 1 precursor, putative [Ricinus communis]
clementine0.9_002924m.g	2910	5.19886	1.71583	3.61305	GO:0016020//membrane	GO:0000166//nucleotide binding;GO:0005515//protein binding	GO:0006810//transport;GO:0051707//response to other organism	gi|255567305|ref|XP_002524633.1|/0/Cyclic nucleotide-gated ion channel, putative [Ricinus communis]
clementine0.9_002925m.g	2602	0.785709	4.33845	4.66237	-	GO:0000166//nucleotide binding;GO:0004386//helicase activity	-	gi|255542404|ref|XP_002512265.1|/0/ATP-dependent helicase NAM7, putative [Ricinus communis]
clementine0.9_002926m.g	2759	10.0776	0.865525	2.05196	GO:0005576//extracellular region;GO:0005618//cell wall;GO:0009536//plastid	GO:0015926//glucosidase activity	GO:0044238//primary metabolic process	gi|255545664|ref|XP_002513892.1|/0/Periplasmic beta-glucosidase precursor, putative [Ricinus communis]
clementine0.9_002930m.g	2791	1.97776	6.84481	17.8213	GO:0005576//extracellular region;GO:0005618//cell wall;GO:0031090//organelle membrane;GO:0031410//cytoplasmic vesicle;GO:0043231//intracellular membrane-bounded organelle	GO:0004175//endopeptidase activity	GO:0019538//protein metabolic process	gi|320117871|gb|ADW11233.1|/0/subtilisin-like protease 2 [Phaseolus vulgaris]
clementine0.9_002931m.g	2556	8.31843	7.55906	16.9284	-	-	-	gi|297735434|emb|CBI17874.3|/0/unnamed protein product [Vitis vinifera]
clementine0.9_002933m.g	3067	2.26639	0.566259	0.593324	-	-	-	gi|296087358|emb|CBI33732.3|/0/unnamed protein product [Vitis vinifera]
clementine0.9_002935m.g	2701	1.81658	8.68037	11.8276	GO:0009536//plastid	GO:0008378//galactosyltransferase activity	GO:0006950//response to stress;GO:0009628//response to abiotic stimulus	gi|255582335|ref|XP_002531958.1|/0/hydrolase, hydrolyzing O-glycosyl compounds, putative [Ricinus communis]
clementine0.9_002942m.g	2462	7.22437	0.617233	1.39612	GO:0031090//organelle membrane	GO:0016811//hydrolase activity, acting on carbon-nitrogen (but not peptide) bonds, in linear amides	-	gi|255573907|ref|XP_002527872.1|/0/ceramidase, putative [Ricinus communis]
clementine0.9_002943m.g	3114	10.57	4.04341	5.97355	-	GO:0016874//ligase activity	-	gi|225438111|ref|XP_002277883.1|/0/PREDICTED: U-box domain-containing protein 3-like isoform 1 [Vitis vinifera]
clementine0.9_002950m.g	2541	6.03428	29.0478	37.16	-	GO:0004553//hydrolase activity, hydrolyzing O-glycosyl compounds;GO:0004672//protein kinase activity;GO:0032559;GO:0043167//ion binding	GO:0006026;GO:0006464//protein modification process	gi|296088199|emb|CBI35714.3|/0/unnamed protein product [Vitis vinifera]
clementine0.9_002951m.g	2745	7.00091	2.45165	2.43072	-	GO:0000166//nucleotide binding;GO:0016301//kinase activity;GO:0030246//carbohydrate binding	GO:0009987//cellular process	gi|317415947|emb|CAR94513.1|/0/protein kinase [Prunus cerasifera]
clementine0.9_002954m.g	2584	78.327	7.56117	10.8764	GO:0042579//microbody	GO:0016641//oxidoreductase activity, acting on the CH-NH2 group of donors, oxygen as acceptor;GO:0046914//transition metal ion binding;GO:0048037//cofactor binding	GO:0006807//nitrogen compound metabolic process	gi|255574009|ref|XP_002527922.1|/0/copper amine oxidase, putative [Ricinus communis]
clementine0.9_002956m.g	2734	123.158	63.2847	55.3919	-	GO:0008378//galactosyltransferase activity	GO:0009628//response to abiotic stimulus	gi|317106767|dbj|BAJ53259.1|/0/JMS10C05.2 [Jatropha curcas]
clementine0.9_002961m.g	3072	37.268	8.33872	26.2612	GO:0030312//external encapsulating structure;GO:0043231//intracellular membrane-bounded organelle	-	-	gi|15230882|ref|NP_191347.1|/0/calcium-dependent lipid-binding domain-containing plant phosphoribosyltransferase-like protein [Arabidopsis thaliana]
clementine0.9_002963m.g	2768	10.1187	4.07827	9.93427	GO:0043231//intracellular membrane-bounded organelle	-	-	gi|296082000|emb|CBI21005.3|/0/unnamed protein product [Vitis vinifera]
clementine0.9_002964m.g	2463	2.57316	0.001	0.001	GO:0005576//extracellular region	GO:0070011	GO:0019538//protein metabolic process	gi|302142715|emb|CBI19918.3|/0/unnamed protein product [Vitis vinifera]
clementine0.9_002966m.g	3074	1.52965	0.001	0.13155	GO:0030312//external encapsulating structure;GO:0043231//intracellular membrane-bounded organelle	-	-	gi|255544770|ref|XP_002513446.1|/0/synaptotagmin, putative [Ricinus communis]
clementine0.9_002969m.g	2866	26.2507	15.4523	56.2976	GO:0031224//intrinsic to membrane;GO:0044431//Golgi apparatus part	GO:0005254//chloride channel activity	GO:0000902//cell morphogenesis;GO:0006873//cellular ion homeostasis;GO:0010035//response to inorganic substance;GO:0015698//inorganic anion transport	gi|297737022|emb|CBI26223.3|/0/unnamed protein product [Vitis vinifera]
clementine0.9_002970m.g	2843	38.7597	14.5083	14.2949	-	-	-	gi|356553493|ref|XP_003545090.1|/1.08365e-131/PREDICTED: uncharacterized protein LOC100815261 [Glycine max]//gi|356553493|ref|XP_003545090.1|/3.71989e-132/PREDICTED: uncharacterized protein LOC100815261 [Glycine max]
clementine0.9_002976m.g	2541	2.816	0.001	0.001	-	GO:0004175//endopeptidase activity;GO:0005515//protein binding;GO:0016628//oxidoreductase activity, acting on the CH-CH group of donors, NAD or NADP as acceptor	GO:0009725//response to hormone stimulus;GO:0010101;GO:0019538//protein metabolic process;GO:0044092//negative regulation of molecular function	gi|255567212|ref|XP_002524587.1|/0/Xylem serine proteinase 1 precursor, putative [Ricinus communis]
clementine0.9_002977m.g	3049	7.17456	3.20401	5.03987	-	-	GO:0009416//response to light stimulus	gi|18397514|ref|NP_566278.1|/0/protein FAR1-related sequence 7 [Arabidopsis thaliana]
clementine0.9_002983m.g	2802	6.34776	2.63421	8.87565	GO:0043231//intracellular membrane-bounded organelle	GO:0003723//RNA binding;GO:0030528//transcription regulator activity	GO:0006396//RNA processing	gi|255556727|ref|XP_002519397.1|/0/plant RNA cleavage stimulation factor, putative [Ricinus communis]
clementine0.9_002988m.g	2604	5.9668	3.00124	10.0164	GO:0005618//cell wall	GO:0015926//glucosidase activity	GO:0044238//primary metabolic process	gi|255548487|ref|XP_002515300.1|/0/Beta-glucosidase, putative [Ricinus communis]
clementine0.9_002989m.g	2660	8.68492	2.28515	2.96446	GO:0009527//plastid outer membrane;GO:0042579//microbody	GO:0005515//protein binding;GO:0017111//nucleoside-triphosphatase activity;GO:0032561//guanyl ribonucleotide binding	GO:0007031//peroxisome organization;GO:0009207;GO:0009658//chloroplast organization	gi|347596005|gb|AEP13980.1|/0/ARC5 protein [Manihot esculenta]
clementine0.9_002992m.g	2949	17.5394	7.80315	6.4449	GO:0043231//intracellular membrane-bounded organelle	-	-	gi|224096282|ref|XP_002310598.1|/0/predicted protein [Populus trichocarpa]
clementine0.9_002995m.g	2506	11.6661	44.9599	27.0288	-	GO:0005488//binding	-	gi|255573230|ref|XP_002527544.1|/0/protein binding protein, putative [Ricinus communis]
clementine0.9_002996m.g	2888	9.9106	4.66051	3.36053	GO:0043231//intracellular membrane-bounded organelle	GO:0004672//protein kinase activity;GO:0032559	GO:0006464//protein modification process	gi|255546081|ref|XP_002514100.1|/0/ATP binding protein, putative [Ricinus communis]
clementine0.9_002999m.g	2494	8.85312	0.001	0.001	GO:0005576//extracellular region;GO:0031410//cytoplasmic vesicle	GO:0004175//endopeptidase activity;GO:0005515//protein binding	GO:0019538//protein metabolic process;GO:0044092//negative regulation of molecular function	gi|255539639|ref|XP_002510884.1|/0/Cucumisin precursor, putative [Ricinus communis]
clementine0.9_003000m.g	2784	7.56375	3.50899	7.48051	-	-	GO:0003006//developmental process involved in reproduction	gi|296086368|emb|CBI31957.3|/0/unnamed protein product [Vitis vinifera]
clementine0.9_003012m.g	2579	0.792716	1.59934	2.90077	-	GO:0004175//endopeptidase activity;GO:0005515//protein binding	GO:0019538//protein metabolic process;GO:0044092//negative regulation of molecular function	gi|296088493|emb|CBI37484.3|/0/unnamed protein product [Vitis vinifera]
clementine0.9_003015m.g	3270	3.25106	0.001	0.0618323	-	GO:0005488//binding	-	gi|147862664|emb|CAN79336.1|/0/hypothetical protein VITISV_026089 [Vitis vinifera]
clementine0.9_003022m.g	3318	13.1858	5.29965	12.9797	-	-	-	gi|296081481|emb|CBI20004.3|/0/unnamed protein product [Vitis vinifera]
clementine0.9_003034m.g	2301	1.06619	0.377383	2.72401	GO:0043231//intracellular membrane-bounded organelle	-	-	gi|297738941|emb|CBI28186.3|/0/unnamed protein product [Vitis vinifera]
clementine0.9_003037m.g	2805	163.918	66.0169	61.5585	GO:0005576//extracellular region;GO:0005618//cell wall	GO:0004175//endopeptidase activity;GO:0005515//protein binding	GO:0003006//developmental process involved in reproduction;GO:0009845//seed germination;GO:0010191;GO:0019538//protein metabolic process;GO:0044092//negative regulation of molecular function	gi|255538108|ref|XP_002510119.1|/0/Xylem serine proteinase 1 precursor, putative [Ricinus communis]
clementine0.9_003038m.g	2591	4.49756	2.68115	6.32093	GO:0009532//plastid stroma;GO:0043234//protein complex	GO:0016462//pyrophosphatase activity;GO:0032559;GO:0051003	GO:0006779//porphyrin biosynthetic process	gi|255544946|ref|XP_002513534.1|/0/Magnesium-chelatase subunit chlD, chloroplast precursor, putative [Ricinus communis]
clementine0.9_003055m.g	3504	40.3165	14.6213	26.2549	GO:0031090//organelle membrane	GO:0004673//protein histidine kinase activity;GO:0004871//signal transducer activity;GO:0032559	GO:0000160//two-component signal transduction system (phosphorelay);GO:0006351//transcription, DNA-dependent;GO:0006468//protein phosphorylation	gi|283520944|gb|ADB25214.1|/0/ethylene response 2 [Citrus sinensis]
clementine0.9_003056m.g	3489	77.2295	28.995	60.9646	-	-	-	gi|219687743|dbj|BAH09382.1|/0/transcription factor LHY [Populus nigra]
clementine0.9_003059m.g	2904	1.056	2.09315	6.05739	GO:0016020//membrane	-	GO:0030001//metal ion transport;GO:0048229//gametophyte development	gi|359472756|ref|XP_002276261.2|/0/PREDICTED: potassium transporter 11-like [Vitis vinifera]
clementine0.9_003061m.g	2982	15.7685	6.552	13.6286	-	GO:0005543//phospholipid binding;GO:0032934//sterol binding	GO:0006629//lipid metabolic process;GO:0023052//signaling	gi|224125020|ref|XP_002329871.1|/0/predicted protein [Populus trichocarpa]//gi|297741168|emb|CBI31899.3|/0/unnamed protein product [Vitis vinifera]
clementine0.9_003063m.g	3034	2.15627	0.930179	3.26545	GO:0009536//plastid	-	GO:0009451//RNA modification	gi|357479991|ref|XP_003610281.1|/0/Pentatricopeptide repeat-containing protein [Medicago truncatula]
clementine0.9_003064m.g	2497	3.84812	5.73805	14.5753	GO:0044464//cell part	GO:0016787//hydrolase activity	GO:0044238//primary metabolic process	gi|255542550|ref|XP_002512338.1|/1.33586e-170/Alpha-L-fucosidase 2 precursor, putative [Ricinus communis]
clementine0.9_003065m.g	2720	7.44107	0.798123	0.743351	GO:0005618//cell wall;GO:0031410//cytoplasmic vesicle	GO:0004175//endopeptidase activity;GO:0005515//protein binding	GO:0019538//protein metabolic process;GO:0044092//negative regulation of molecular function	gi|255550431|ref|XP_002516266.1|/0/Xylem serine proteinase 1 precursor, putative [Ricinus communis]
clementine0.9_003067m.g	2454	7.08131	3.53854	8.23927	-	-	-	gi|302144194|emb|CBI23321.3|/0/unnamed protein product [Vitis vinifera]
clementine0.9_003068m.g	2965	30.4077	12.8863	19.5713	GO:0031225//anchored to membrane	GO:0008081//phosphoric diester hydrolase activity	GO:0000904//cell morphogenesis involved in differentiation;GO:0009913//epidermal cell differentiation;GO:0010383;GO:0019400	gi|255576268|ref|XP_002529027.1|/0/glycerophosphoryl diester phosphodiesterase, putative [Ricinus communis]
clementine0.9_003069m.g	2510	1.05886	0.001	0.0813321	GO:0044464//cell part	GO:0015197//peptide transporter activity	GO:0015833//peptide transport	gi|224072274|ref|XP_002303684.1|/0/oligopeptide transporter OPT family [Populus trichocarpa]//gi|255555713|ref|XP_002518892.1|/0/Oligopeptide transporter, putative [Ricinus communis]
clementine0.9_003070m.g	2790	3.88366	10.5821	28.2633	-	GO:0004553//hydrolase activity, hydrolyzing O-glycosyl compounds;GO:0004672//protein kinase activity;GO:0032559	GO:0005975//carbohydrate metabolic process;GO:0006464//protein modification process	gi|296088199|emb|CBI35714.3|/0/unnamed protein product [Vitis vinifera]
clementine0.9_003075m.g	2906	5.83918	2.39052	5.14872	GO:0016020//membrane	GO:0016628//oxidoreductase activity, acting on the CH-CH group of donors, NAD or NADP as acceptor;GO:0032559	GO:0006950//response to stress;GO:0010038//response to metal ion;GO:0044267//cellular protein metabolic process	gi|255563893|ref|XP_002522946.1|/0/Heat-shock protein 105 kDa, putative [Ricinus communis]
clementine0.9_003080m.g	2650	0.154295	0.163841	2.97565	-	GO:0016853//isomerase activity	-	gi|300431227|gb|ADK12003.1|/0/beta-amyrin synthase [Aralia elata]
clementine0.9_003083m.g	3038	8.07537	2.57249	5.12467	GO:0005576//extracellular region;GO:0005618//cell wall	GO:0004175//endopeptidase activity;GO:0005515//protein binding	GO:0003006//developmental process involved in reproduction;GO:0009845//seed germination;GO:0010191;GO:0019538//protein metabolic process;GO:0044092//negative regulation of molecular function	gi|255584904|ref|XP_002533167.1|/0/Xylem serine proteinase 1 precursor, putative [Ricinus communis]
clementine0.9_003102m.g	2570	3.02287	1.436	6.05788	-	GO:0003824//catalytic activity	GO:0006399//tRNA metabolic process	gi|297746159|emb|CBI16215.3|/1.02942e-149/unnamed protein product [Vitis vinifera]//gi|297746159|emb|CBI16215.3|/3.12199e-140/unnamed protein product [Vitis vinifera]
clementine0.9_003104m.g	5724	38.1453	16.6117	15.2951	GO:0044444//cytoplasmic part	GO:0004674//protein serine/threonine kinase activity	-	gi|255547862|ref|XP_002514988.1|/0/cdk10/11, putative [Ricinus communis]
clementine0.9_003106m.g	2649	184.298	575.218	269.512	GO:0016021//integral to membrane;GO:0031090//organelle membrane;GO:0043231//intracellular membrane-bounded organelle	GO:0015405;GO:0016462//pyrophosphatase activity;GO:0016628//oxidoreductase activity, acting on the CH-CH group of donors, NAD or NADP as acceptor;GO:0046872//metal ion binding	GO:0006818//hydrogen transport;GO:0008152//metabolic process	gi|255579837|ref|XP_002530755.1|/0/Pyrophosphate-energized vacuolar membrane proton pump, putative [Ricinus communis]
clementine0.9_003110m.g	2844	12.0048	9.00723	23.2478	-	-	-	gi|255556123|ref|XP_002519096.1|/0/phospholipase A-2-activating protein, putative [Ricinus communis]
clementine0.9_003114m.g	3048	5.70129	2.84894	7.89396	-	GO:0003824//catalytic activity	-	gi|255586287|ref|XP_002533795.1|/0/adenosine diphosphatase, putative [Ricinus communis]
clementine0.9_003117m.g	2497	0.654999	1.3041	4.85843	-	-	-	gi|359492675|ref|XP_002281567.2|/5.49166e-124/PREDICTED: uncharacterized protein LOC100253949 [Vitis vinifera]
clementine0.9_003124m.g	2483	0.494019	0.786873	2.52434	GO:0043231//intracellular membrane-bounded organelle	-	-	gi|255586261|ref|XP_002533783.1|/0/pentatricopeptide repeat-containing protein, putative [Ricinus communis]
clementine0.9_003127m.g	3022	4.05906	1.07755	4.21511	-	-	-	gi|255541015|ref|XP_002511572.1|/0/pentatricopeptide repeat-containing protein, putative [Ricinus communis]
clementine0.9_003128m.g	2369	4.66013	0.916376	3.15791	GO:0031224//intrinsic to membrane	GO:0004871//signal transducer activity	GO:0009267//cellular response to starvation	gi|255575849|ref|XP_002528822.1|/0/xenotropic and polytropic murine leukemia virus receptor pho1, putative [Ricinus communis]
clementine0.9_003136m.g	3011	28.3814	23.7926	49.0202	GO:0043231//intracellular membrane-bounded organelle	GO:0046872//metal ion binding	-	gi|255547432|ref|XP_002514773.1|/0/leucine zipper-ef-hand containing transmembrane protein, putative [Ricinus communis]
clementine0.9_003138m.g	2796	10.0173	10.7924	22.2729	GO:0009536//plastid	GO:0003676//nucleic acid binding	-	gi|297742560|emb|CBI34709.3|/0/unnamed protein product [Vitis vinifera]
clementine0.9_003139m.g	2440	1.59196	1.86839	7.29216	GO:0016020//membrane;GO:0043234//protein complex;GO:0044444//cytoplasmic part	-	GO:0000904//cell morphogenesis involved in differentiation;GO:0009856//pollination	gi|255572385|ref|XP_002527131.1|/0/exocyst complex component sec6, putative [Ricinus communis]
clementine0.9_003140m.g	2807	7.5746	24.3617	38.3206	GO:0009536//plastid	GO:0004672//protein kinase activity;GO:0008378//galactosyltransferase activity;GO:0032559	GO:0005985//sucrose metabolic process;GO:0006464//protein modification process;GO:0006950//response to stress;GO:0009312//oligosaccharide biosynthetic process;GO:0009725//response to hormone stimulus;GO:0019406;GO:0023052//signaling	gi|118487822|gb|ABK95734.1|/0/unknown [Populus trichocarpa]
clementine0.9_003141m.g	3010	63.8455	100.034	134.212	GO:0043231//intracellular membrane-bounded organelle	GO:0004175//endopeptidase activity	GO:0019538//protein metabolic process	gi|297742723|emb|CBI35357.3|/0/unnamed protein product [Vitis vinifera]
[truncated: 5,930 more rows]

## Sheet: selected-260
260 DEGs highly correlated with citric acid content (threshold value >0.7)
[truncated: 261 more rows]

[truncated: 3 more sheets: ranking-260, selected-22TFs, formula]
